# Supplementary material for: A unique cerebellar pattern of microglia activation in a mouse model of encephalopathy of prematurity
Source: bioRxiv or medRxiv preprint supplement (doi:10.1101/2021.06.26.449853), 2021-06-26
Supplement: Supplementary file [file media-2.pdf]

**Supplementary table 1: List of antibodies and primers****Table 1A: Primary antibodies for immunohistochemistry**

| Antigen | Specification     | Company        | Number    | Dilution | Incubation Time |
|---------|-------------------|----------------|-----------|----------|-----------------|
| PAX6    | Mouse Anti Pax6   | Millipore      | MAB5552   | 1:100    | 24h             |
| KI67    | Rabbit Anti Ki67  | Abcam          | Ab16667   | 1:200    | 24h             |
| OLIG2   | Mouse Anti Olig2  | Abcam          | Ab56643   | 1:500    | 24h             |
| OLIG1   | Rabbit Anti Olig1 | Millipore      | AB15620   | 1:750    | 24h             |
| PCNA    | Mouse Anti PCNA   | Abcam          | Ab29      | 1:1000   | 24h             |
| PCNA    | Rabbit Anti PCNA  | Abcam          | Ab15497   | 1:500    | 24h             |
| CASP3   | Rabbit Anti Casp3 | Cell Signaling | 9664      | 1:200    | 24h             |
| IBA1    | Rabbit Anti Iba1  | Wako Chemicals | 019-19741 | 1:750    | 48h             |
| MAG     | Mouse Anti MAG    | Abcam          | Ab89780   | 1:1000   | 24h             |
| MOG     | Rabbit Anti MOG   | Abcam          | Ab32760   | 1:1500   | 24h             |
| BRDU    | Rabbit Anti Brdu  | Bioss          | Bs-0489R  | 1:50     | 24h             |
| BRDU    | Chicken Anti Brdu | Abcam          | Ab92837   | 1:300    | 48h             |
| APC     | Mouse Anti CC1    | Calbiochem     | OP86      | 1:250    | 24h             |

PAX6, Paired Box 6; KI67, Marker of proliferation KI-67; OLIG2, Oligodendrocyte Transcription Factor 2; OLIG1, Oligodendrocyte Transcription Factor 1; PCNA, Proliferating Cell Nuclear Antigen; CASP3, Cleaved Caspase 3; IBA1, Ionized Calcium-Binding Adapter Molecule 1; MAG, Myelin-Associated Glycoprotein; MOG, Myelin Oligodendrocyte Glycoprotein; BRDU, Bromo-Desoxyuridine; APC, Anti-Adenomatous Polyposis Coli Clone 1.

**Table 1B: Secondary antibodies for immunohistochemistry**

| Antigen | Specification                          | Company          | Number | Dilution | IT |
|---------|----------------------------------------|------------------|--------|----------|----|
| Rabbit  | Goat Anti Rabbit, Alexa Fluor, 488nm   | Invitrogen       | A11034 | 1:200    | 1h |
| Chicken | Goat Anti Chicken, Alexa Fluor, 594nm  | Molecular Probes | A11042 | 1:200    | 1h |
| Mouse   | Goat Anti Mouse, Alexa Fluor, 594nm    | Molecular Probes | A11032 | 1:200    | 1h |
| Mouse   | Goat Anti Mouse, Alexa Fluor, 488nm    | Molecular Probes | A11029 | 1:200    | 1h |
| Rabbit  | Goat Anti Rabbit, Alexa Fluor, 594nm   | Molecular Probes | A11037 | 1:200    | 1h |
| Rabbit  | Donkey Anti Rabbit, Alexa Fluor, 546nm | Molecular Probes | A10040 | 1:200    | 1h |

IT, incubation time

**Table 1c: Sequences of oligonucleotides and gene loci**

| Gene                 | Oligonucleotide Sequences 5'-3' | Gene Bank Sequence       |                |
|----------------------|---------------------------------|--------------------------|----------------|
| <i>Hprt</i>          | Forward                         | TGCTGACCTGCTGGATTACATT   | NM_013556.2    |
|                      | Reverse                         | TCCCCGTTGACTGATCATT      |                |
|                      | Probe                           | TCAGACTGAAGAGCTACTG      |                |
| <i>Olig2</i>         | Forward                         | ATCTTCCTCCAGCACCTCCT     | NM_016967.2    |
|                      | Reverse                         | GGGCTCAGTCATCTGCTTCT     |                |
|                      | Probe                           | CCACGTCTTCCACCAAGAAA     |                |
| <i>Cnp</i>           | Forward                         | AGCAGGAGGTGGTGAAGAGA     | NM_001146318.1 |
|                      | Reverse                         | GATGGCTTGTCCAGATCA       |                |
|                      | Probe                           | TTTGTGACACCCAAGACAGC     |                |
| <i>Gclc</i>          | Forward                         | GTGGAGGCCAATATGAGGAA     | NM_010295.2    |
|                      | Reverse                         | CTGGGTTGGGTCTGTGTTCT     |                |
|                      | Probe                           | AGGCTCTCTGCACCATCACT     |                |
| <i>Sod2</i>          | Forward                         | CCGAGGAGAAGTACCACGAG     | NM_013671.3    |
|                      | Reverse                         | ATATGTCCCCACCATTGAA      |                |
|                      | Probe                           | ACAACCTCAGGTCGCTCTTCAG   |                |
| <i>H2-Ab (MchII)</i> | Forward                         | CATCAAGGCCGACCACATG      | NM_008206.2    |
|                      | Reverse                         | TCCCCGTCAAATTCGTGTGT     |                |
|                      | Probe                           | CTTCTACCAATCTTACGACGCT   |                |
| <i>Nos2</i>          | Forward                         | CATCGACCCGTCCACAGTATG    | NM_001313922.1 |
|                      | Reverse                         | GAAATCCGATGTGGCCTTGT     |                |
|                      | Probe                           | CAGTGGAGAGATTTTGCATG     |                |
| <i>Igf1</i>          | Forward                         | GCTGGTGGATGCTCTTCAGTT    | NM_010512.5    |
|                      | Reverse                         | AGGTGCCCTCCGAATGCT       |                |
|                      | Probe                           | Detected With SYBR Green |                |
| <i>Ccnd2</i>         | Forward                         | TCGATGATTGCAACTGGAAG     | NM_009829.3    |
|                      | Reverse                         | TCCACATCAGTGTGGGTGAT     |                |
|                      | Probe                           | ACACACTCACGTGTGATGCC     |                |

*Hprt*, hypoxanthine-guanine phosphoribosyl-transferase; *Olig2*, oligodendrocyte transcription factor 2; *Cnp*, 2',3'-cyclic nucleotide 3'-phosphodiesterase; *Gclc*, glutamate-cysteine ligase catalytic subunit; *Sod2*, superoxide dismutase 2; *H2-Ab*, MHC class II antigen; *Nos2* = nitric oxide synthase 2; *Igf1*, insulin-like growth factor 1; *Ccnd2*, cyclin D2

**Supplementary table 2:**  
**Atlas-based segmentation dataset, including absolute and relative volumes**  
**and statistical analysis of data from PBS and IL-1 $\beta$  exposed mice.**

| Atlas ROI                           | Absolute volumes (mm3) |       |              |       |          |             | Absolute volumes (mm3) |       |              |       |          |             |
|-------------------------------------|------------------------|-------|--------------|-------|----------|-------------|------------------------|-------|--------------|-------|----------|-------------|
|                                     | P15                    |       | IL-1 $\beta$ |       | % change | Effect (SD) | P60                    |       | IL-1 $\beta$ |       | % change | Effect (SD) |
|                                     | Saline                 | SD    | Mean         | SD    |          |             | Mean                   | SD    | Mean         | SD    |          |             |
| amygdala                            | 8,797                  | 0,667 | 8,265        | 0,833 | -6,0     | -0,80       | 10,107                 | 0,673 | 9,602        | 0,614 | -5,0     | -0,75       |
| anterior commissure: pars anterior  | 1,004                  | 0,053 | 0,990        | 0,070 | -1,5     | -0,28       | 1,201                  | 0,090 | 1,138        | 0,079 | -5,2     | -0,70       |
| anterior commissure: pars posterior | 0,342                  | 0,020 | 0,326        | 0,027 | -4,5     | -0,78       | 0,417                  | 0,035 | 0,399        | 0,020 | -4,2     | -0,50       |
| basal forebrain                     | 4,873                  | 0,375 | 4,623        | 0,443 | -5,1     | -0,67       | 5,545                  | 0,425 | 5,228        | 0,324 | -5,7     | -0,75       |
| bed nucleus of stria terminalis     | 1,161                  | 0,099 | 1,122        | 0,106 | -3,4     | -0,40       | 1,352                  | 0,141 | 1,283        | 0,087 | -5,1     | -0,49       |
| cerebellar peduncle: inferior       | 0,690                  | 0,053 | 0,663        | 0,029 | -4,0     | -0,51       | 0,818                  | 0,024 | 0,802        | 0,040 | -2,0     | -0,66       |
| cerebellar peduncle: middle         | 0,977                  | 0,060 | 0,944        | 0,045 | -3,4     | -0,56       | 1,249                  | 0,082 | 1,166        | 0,098 | -6,7     | -1,02       |
| cerebellar peduncle: superior       | 0,781                  | 0,070 | 0,744        | 0,043 | -4,8     | -0,53       | 0,993                  | 0,094 | 0,921        | 0,061 | -7,3     | -0,77       |
| cerebral aqueduct                   | 0,477                  | 0,023 | 0,468        | 0,044 | -1,9     | -0,40       | 0,529                  | 0,053 | 0,470        | 0,041 | -11,2    | -1,12       |
| cerebral peduncle                   | 1,693                  | 0,128 | 1,596        | 0,065 | -5,7     | -0,75       | 2,216                  | 0,178 | 2,116        | 0,150 | -4,5     | -0,56       |
| colliculus: inferior                | 4,798                  | 0,366 | 4,648        | 0,170 | -3,1     | -0,41       | 5,755                  | 0,392 | 5,412        | 0,306 | -6,0     | -0,87       |
| colliculus: superior                | 7,749                  | 0,615 | 7,472        | 0,331 | -3,6     | -0,45       | 8,933                  | 0,528 | 8,515        | 0,579 | -4,7     | -0,79       |
| corpus callosum                     | 11,430                 | 0,611 | 11,130       | 0,473 | -2,6     | -0,49       | 13,556                 | 1,190 | 12,733       | 1,074 | -6,1     | -0,69       |
| corticospinal tract/pyramids        | 1,309                  | 0,142 | 1,262        | 0,080 | -3,6     | -0,33       | 1,562                  | 0,077 | 1,539        | 0,090 | -1,5     | -0,30       |
| cuneate nucleus                     | 0,266                  | 0,024 | 0,265        | 0,020 | -0,4     | -0,05       | 0,266                  | 0,026 | 0,269        | 0,027 | 0,9      | 0,10        |
| dentate gyrus of hippocampus        | 2,743                  | 0,131 | 2,617        | 0,103 | -4,6     | -0,96       | 3,353                  | 0,225 | 3,120        | 0,292 | -6,9     | -1,03       |
| facial nerve (cranial nerve 7)      | 0,188                  | 0,014 | 0,181        | 0,009 | -3,7     | -0,51       | 0,235                  | 0,016 | 0,226        | 0,019 | -3,6     | -0,53       |
| fasciculus retroflexus              | 0,232                  | 0,013 | 0,227        | 0,010 | -2,5     | -0,44       | 0,280                  | 0,025 | 0,262        | 0,018 | -6,4     | -0,72       |
| fimbria                             | 2,706                  | 0,191 | 2,595        | 0,172 | -4,1     | -0,58       | 3,243                  | 0,300 | 3,066        | 0,249 | -5,5     | -0,59       |
| fornix                              | 0,569                  | 0,041 | 0,540        | 0,040 | -5,2     | -0,72       | 0,671                  | 0,066 | 0,633        | 0,035 | -5,6     | -0,57       |
| fourth ventricle                    | 0,841                  | 0,094 | 0,799        | 0,092 | -5,0     | -0,45       | 0,936                  | 0,056 | 0,839        | 0,059 | -10,4    | -1,73       |

|                                                 |        |       |        |       |      |       |        |       |        |       |      |       |
|-------------------------------------------------|--------|-------|--------|-------|------|-------|--------|-------|--------|-------|------|-------|
| fundus of striatum                              | 0,163  | 0,011 | 0,152  | 0,013 | -7,2 | -1,03 | 0,186  | 0,016 | 0,176  | 0,013 | -5,2 | -0,59 |
| globus pallidus                                 | 2,265  | 0,187 | 2,087  | 0,069 | -7,9 | -0,95 | 3,048  | 0,340 | 2,827  | 0,168 | -7,2 | -0,65 |
| habenular commissure                            | 0,030  | 0,001 | 0,030  | 0,002 | -0,5 | -0,10 | 0,034  | 0,004 | 0,034  | 0,004 | 1,6  | 0,12  |
| hippocampus                                     | 17,503 | 0,974 | 16,890 | 0,583 | -3,5 | -0,63 | 21,314 | 1,119 | 20,072 | 1,606 | -5,8 | -1,11 |
| hypothalamus                                    | 8,958  | 0,615 | 8,588  | 0,753 | -4,1 | -0,60 | 10,245 | 0,884 | 9,783  | 0,515 | -4,5 | -0,52 |
| inferior olivary complex                        | 0,222  | 0,030 | 0,217  | 0,017 | -2,0 | -0,15 | 0,266  | 0,019 | 0,263  | 0,017 | -1,1 | -0,15 |
| internal capsule                                | 2,158  | 0,188 | 1,985  | 0,086 | -8,0 | -0,92 | 2,934  | 0,325 | 2,748  | 0,229 | -6,4 | -0,57 |
| interpeduncular nucleus                         | 0,215  | 0,025 | 0,202  | 0,024 | -6,0 | -0,52 | 0,258  | 0,022 | 0,244  | 0,030 | -5,2 | -0,61 |
| lateral olfactory tract                         | 0,775  | 0,034 | 0,754  | 0,043 | -2,7 | -0,62 | 0,852  | 0,043 | 0,797  | 0,061 | -6,5 | -1,30 |
| lateral septum                                  | 2,509  | 0,226 | 2,419  | 0,180 | -3,6 | -0,40 | 2,920  | 0,246 | 2,770  | 0,184 | -5,2 | -0,61 |
| lateral ventricle                               | 2,537  | 0,202 | 2,479  | 0,219 | -2,3 | -0,29 | 2,939  | 0,253 | 2,760  | 0,231 | -6,1 | -0,71 |
| mammillary bodies                               | 0,390  | 0,029 | 0,377  | 0,036 | -3,5 | -0,47 | 0,473  | 0,043 | 0,477  | 0,036 | 1,0  | 0,11  |
| mammillothalamic tract                          | 0,240  | 0,013 | 0,231  | 0,011 | -3,5 | -0,63 | 0,268  | 0,022 | 0,251  | 0,014 | -6,2 | -0,77 |
| medial lemniscus/medial longitudinal fasciculus | 2,145  | 0,165 | 2,074  | 0,060 | -3,3 | -0,43 | 2,626  | 0,143 | 2,532  | 0,124 | -3,6 | -0,66 |
| medial septum                                   | 1,155  | 0,090 | 1,094  | 0,111 | -5,3 | -0,68 | 1,335  | 0,106 | 1,276  | 0,065 | -4,4 | -0,55 |
| medulla                                         | 22,692 | 1,765 | 22,037 | 0,973 | -2,9 | -0,37 | 25,365 | 1,352 | 24,728 | 1,671 | -2,5 | -0,47 |
| midbrain                                        | 11,177 | 0,823 | 10,628 | 0,525 | -4,9 | -0,67 | 14,179 | 1,241 | 13,245 | 0,975 | -6,6 | -0,75 |
| nucleus accumbens                               | 3,652  | 0,274 | 3,537  | 0,280 | -3,2 | -0,42 | 4,274  | 0,314 | 4,120  | 0,262 | -3,6 | -0,49 |
| olfactory bulbs                                 | 19,548 | 0,898 | 18,551 | 0,919 | -5,1 | -1,11 | 20,108 | 1,394 | 18,559 | 1,938 | -7,7 | -1,11 |
| olfactory tubercle                              | 2,739  | 0,153 | 2,678  | 0,186 | -2,2 | -0,40 | 3,340  | 0,259 | 3,233  | 0,246 | -3,2 | -0,41 |
| optic tract                                     | 1,444  | 0,083 | 1,373  | 0,076 | -4,9 | -0,85 | 1,794  | 0,137 | 1,704  | 0,096 | -5,0 | -0,66 |
| periaqueductal grey                             | 3,751  | 0,249 | 3,578  | 0,201 | -4,6 | -0,69 | 4,311  | 0,301 | 4,006  | 0,271 | -7,1 | -1,01 |
| pons                                            | 13,094 | 0,938 | 12,437 | 0,570 | -5,0 | -0,70 | 16,533 | 0,986 | 15,735 | 0,920 | -4,8 | -0,81 |
| pontine nucleus                                 | 0,626  | 0,057 | 0,609  | 0,045 | -2,6 | -0,29 | 0,805  | 0,050 | 0,773  | 0,067 | -3,9 | -0,63 |
| posterior commissure                            | 0,138  | 0,009 | 0,136  | 0,009 | -1,3 | -0,19 | 0,156  | 0,011 | 0,145  | 0,011 | -7,4 | -1,05 |
| pre-para subiculum                              | 1,985  | 0,217 | 1,929  | 0,101 | -2,8 | -0,25 | 2,266  | 0,111 | 2,119  | 0,149 | -6,5 | -1,33 |
| stratum granulosum of hippocampus               | 0,697  | 0,032 | 0,660  | 0,033 | -5,3 | -1,15 | 0,843  | 0,053 | 0,775  | 0,070 | -8,0 | -1,28 |
| stria medullaris                                | 0,653  | 0,035 | 0,628  | 0,028 | -3,8 | -0,72 | 0,734  | 0,046 | 0,696  | 0,047 | -5,2 | -0,83 |

|                                                   |        |       |        |       |       |       |        |       |        |       |       |       |
|---------------------------------------------------|--------|-------|--------|-------|-------|-------|--------|-------|--------|-------|-------|-------|
| stria terminalis                                  | 0,705  | 0,072 | 0,657  | 0,046 | -6,9  | -0,68 | 0,915  | 0,094 | 0,860  | 0,081 | -6,0  | -0,59 |
| striatum                                          | 16,749 | 1,580 | 16,285 | 1,023 | -2,8  | -0,29 | 21,450 | 1,796 | 20,677 | 1,019 | -3,6  | -0,43 |
| subependymale zone / rhinocele                    | 0,070  | 0,004 | 0,068  | 0,005 | -2,5  | -0,39 | 0,071  | 0,003 | 0,066  | 0,005 | -6,8  | -1,42 |
| superior olivary complex                          | 0,490  | 0,053 | 0,476  | 0,035 | -2,8  | -0,26 | 0,610  | 0,041 | 0,585  | 0,051 | -4,1  | -0,62 |
| thalamus                                          | 14,682 | 1,052 | 14,059 | 0,642 | -4,2  | -0,59 | 17,157 | 1,255 | 16,157 | 0,953 | -5,8  | -0,80 |
| third ventricle                                   | 0,910  | 0,054 | 0,878  | 0,055 | -3,4  | -0,58 | 1,000  | 0,073 | 0,952  | 0,061 | -4,9  | -0,67 |
| ventral tegmental decussation                     | 0,122  | 0,009 | 0,115  | 0,012 | -6,0  | -0,84 | 0,149  | 0,014 | 0,138  | 0,015 | -7,3  | -0,80 |
| lobules 1-2: lingula and central lobule (ventral) | 1,950  | 0,123 | 1,792  | 0,153 | -8,1  | -1,29 | 2,430  | 0,297 | 2,031  | 0,143 | -16,4 | -1,34 |
| lobule 3: central lobule (dorsal)                 | 1,979  | 0,230 | 1,801  | 0,161 | -9,0  | -0,77 | 2,584  | 0,273 | 2,324  | 0,165 | -10,1 | -0,95 |
| lobules 4-5: culmen (ventral and dorsal)          | 3,631  | 0,441 | 3,570  | 0,286 | -1,7  | -0,14 | 4,552  | 0,370 | 4,322  | 0,286 | -5,1  | -0,62 |
| lobule 6: declive                                 | 2,041  | 0,214 | 2,114  | 0,212 | 3,6   | 0,34  | 2,382  | 0,158 | 2,253  | 0,194 | -5,4  | -0,82 |
| lobule 7: tuber (or folium)                       | 0,825  | 0,097 | 0,858  | 0,095 | 3,9   | 0,33  | 0,880  | 0,108 | 0,814  | 0,094 | -7,5  | -0,61 |
| lobule 8: pyramis                                 | 1,253  | 0,120 | 1,288  | 0,142 | 2,8   | 0,29  | 1,301  | 0,184 | 1,213  | 0,172 | -6,7  | -0,48 |
| lobule 9: uvula                                   | 2,819  | 0,202 | 2,835  | 0,276 | 0,5   | 0,08  | 2,810  | 0,282 | 2,654  | 0,200 | -5,5  | -0,55 |
| lobule 10: nodulus                                | 1,651  | 0,199 | 1,651  | 0,281 | 0,0   | 0,00  | 1,711  | 0,083 | 1,637  | 0,093 | -4,3  | -0,88 |
| anterior lobule (lobules 4-5)                     | 1,675  | 0,148 | 1,563  | 0,125 | -6,7  | -0,76 | 2,137  | 0,205 | 1,904  | 0,200 | -10,9 | -1,14 |
| simple lobule (lobule 6)                          | 5,119  | 0,560 | 5,015  | 0,457 | -2,0  | -0,19 | 6,286  | 0,381 | 5,723  | 0,477 | -9,0  | -1,48 |
| crus 1: ansiform lobule (lobule 6)                | 4,703  | 0,493 | 4,650  | 0,564 | -1,1  | -0,11 | 5,309  | 0,462 | 4,863  | 0,373 | -8,4  | -0,96 |
| crus 2: ansiform lobule (lobule 7)                | 3,269  | 0,302 | 3,326  | 0,387 | 1,7   | 0,19  | 3,491  | 0,385 | 3,287  | 0,302 | -5,8  | -0,53 |
| paramedian lobule (lobule 7)                      | 3,368  | 0,281 | 3,489  | 0,363 | 3,6   | 0,43  | 3,461  | 0,312 | 3,479  | 0,364 | 0,5   | 0,06  |
| copula: pyramis (lobule 8)                        | 2,063  | 0,175 | 2,127  | 0,219 | 3,1   | 0,37  | 2,200  | 0,162 | 2,136  | 0,205 | -2,9  | -0,39 |
| flocculus (FL)                                    | 0,994  | 0,053 | 0,941  | 0,043 | -5,4  | -1,01 | 1,098  | 0,106 | 1,036  | 0,083 | -5,6  | -0,58 |
| paraflocculus (PFL)                               | 4,192  | 0,212 | 4,093  | 0,104 | -2,4  | -0,47 | 4,253  | 0,272 | 4,113  | 0,254 | -3,3  | -0,51 |
| trunk of arbor vita                               | 3,202  | 0,330 | 3,072  | 0,332 | -4,1  | -0,39 | 4,413  | 0,477 | 4,111  | 0,279 | -6,9  | -0,63 |
| lobule 1-2 white matter                           | 0,106  | 0,008 | 0,095  | 0,010 | -10,4 | -1,41 | 0,141  | 0,019 | 0,115  | 0,010 | -18,4 | -1,38 |
| lobule 3 white matter                             | 0,265  | 0,029 | 0,243  | 0,023 | -8,2  | -0,74 | 0,348  | 0,044 | 0,314  | 0,027 | -9,9  | -0,79 |
| trunk of lobules 1-3 white matter                 | 0,138  | 0,014 | 0,125  | 0,011 | -9,1  | -0,89 | 0,205  | 0,031 | 0,186  | 0,016 | -9,1  | -0,59 |
| lobules 4-5 white matter                          | 0,701  | 0,080 | 0,708  | 0,061 | 0,9   | 0,08  | 0,880  | 0,090 | 0,841  | 0,063 | -4,5  | -0,44 |

|                                             |       |       |       |       |       |       |       |       |       |       |       |       |
|---------------------------------------------|-------|-------|-------|-------|-------|-------|-------|-------|-------|-------|-------|-------|
| lobules 6-7 white matter                    | 0,702 | 0,092 | 0,759 | 0,103 | 8,1   | 0,62  | 0,862 | 0,094 | 0,797 | 0,071 | -7,6  | -0,70 |
| lobule 8 white matter                       | 0,165 | 0,018 | 0,171 | 0,021 | 3,3   | 0,31  | 0,177 | 0,027 | 0,161 | 0,024 | -8,7  | -0,57 |
| trunk of lobules 6-8 white matter           | 0,118 | 0,019 | 0,127 | 0,016 | 6,9   | 0,43  | 0,139 | 0,014 | 0,128 | 0,015 | -7,5  | -0,74 |
| lobule 9 white matter                       | 0,386 | 0,038 | 0,387 | 0,037 | 0,2   | 0,02  | 0,393 | 0,051 | 0,365 | 0,032 | -7,0  | -0,54 |
| lobule 10 white matter                      | 0,124 | 0,016 | 0,124 | 0,023 | -0,1  | -0,01 | 0,129 | 0,008 | 0,124 | 0,008 | -4,1  | -0,65 |
| anterior lobule white matter                | 0,100 | 0,008 | 0,093 | 0,009 | -6,9  | -0,83 | 0,132 | 0,015 | 0,121 | 0,015 | -8,4  | -0,73 |
| simple lobule white matter                  | 0,571 | 0,064 | 0,555 | 0,053 | -2,7  | -0,24 | 0,724 | 0,052 | 0,650 | 0,066 | -10,3 | -1,43 |
| crus 1 white matter                         | 0,499 | 0,064 | 0,491 | 0,072 | -1,7  | -0,13 | 0,614 | 0,066 | 0,548 | 0,054 | -10,8 | -1,01 |
| trunk of simple and crus 1 white matter     | 0,145 | 0,021 | 0,147 | 0,024 | 0,9   | 0,06  | 0,206 | 0,027 | 0,183 | 0,020 | -11,4 | -0,87 |
| crus 2 white matter                         | 0,316 | 0,036 | 0,328 | 0,048 | 3,9   | 0,34  | 0,347 | 0,047 | 0,322 | 0,033 | -7,3  | -0,54 |
| paramedian lobule                           | 0,231 | 0,027 | 0,246 | 0,031 | 6,1   | 0,53  | 0,241 | 0,027 | 0,242 | 0,027 | 0,3   | 0,03  |
| trunk of crus 2 and paramedian white matter | 0,338 | 0,041 | 0,359 | 0,053 | 6,3   | 0,51  | 0,381 | 0,042 | 0,370 | 0,028 | -3,0  | -0,27 |
| copula white matter                         | 0,111 | 0,010 | 0,113 | 0,013 | 2,1   | 0,24  | 0,118 | 0,011 | 0,109 | 0,010 | -8,3  | -0,88 |
| paraflocculus white matter                  | 0,360 | 0,021 | 0,353 | 0,010 | -2,0  | -0,34 | 0,369 | 0,032 | 0,357 | 0,025 | -3,4  | -0,39 |
| flocculus white matter                      | 0,065 | 0,006 | 0,060 | 0,004 | -7,0  | -0,81 | 0,074 | 0,008 | 0,070 | 0,006 | -5,7  | -0,52 |
| dentate nucleus                             | 0,246 | 0,032 | 0,233 | 0,024 | -5,1  | -0,39 | 0,347 | 0,033 | 0,328 | 0,026 | -5,4  | -0,58 |
| nucleus interpositus                        | 0,270 | 0,034 | 0,242 | 0,023 | -10,3 | -0,83 | 0,429 | 0,063 | 0,390 | 0,034 | -9,1  | -0,62 |
| fastigial nucleus                           | 0,246 | 0,032 | 0,229 | 0,029 | -6,7  | -0,51 | 0,369 | 0,054 | 0,338 | 0,027 | -8,3  | -0,57 |
| Cingulate cortex: area 24a                  | 1,472 | 0,070 | 1,451 | 0,117 | -1,4  | -0,30 | 1,538 | 0,199 | 1,491 | 0,141 | -3,1  | -0,24 |
| Cingulate cortex: area 24a'                 | 0,648 | 0,031 | 0,644 | 0,076 | -0,6  | -0,12 | 0,681 | 0,063 | 0,669 | 0,060 | -1,9  | -0,20 |
| Cingulate cortex: area 24b                  | 1,259 | 0,055 | 1,234 | 0,090 | -2,0  | -0,46 | 1,247 | 0,131 | 1,203 | 0,088 | -3,5  | -0,34 |
| Cingulate cortex: area 24b'                 | 0,456 | 0,021 | 0,453 | 0,054 | -0,7  | -0,15 | 0,475 | 0,040 | 0,465 | 0,035 | -2,0  | -0,23 |
| Cingulate cortex: area 25                   | 0,489 | 0,037 | 0,497 | 0,039 | 1,6   | 0,20  | 0,514 | 0,032 | 0,488 | 0,029 | -5,1  | -0,82 |
| Cingulate cortex: area 29a                  | 0,696 | 0,052 | 0,690 | 0,058 | -0,8  | -0,10 | 0,730 | 0,050 | 0,724 | 0,060 | -0,8  | -0,12 |
| Cingulate cortex: area 29b                  | 0,393 | 0,031 | 0,383 | 0,032 | -2,5  | -0,32 | 0,414 | 0,030 | 0,402 | 0,034 | -3,1  | -0,43 |
| Cingulate cortex: area 29c                  | 1,503 | 0,080 | 1,498 | 0,161 | -0,4  | -0,07 | 1,549 | 0,100 | 1,581 | 0,116 | 2,1   | 0,32  |
| Cingulate cortex: area 30                   | 2,615 | 0,163 | 2,640 | 0,245 | 1,0   | 0,15  | 2,822 | 0,211 | 2,709 | 0,254 | -4,0  | -0,53 |
| Cingulate cortex: area 32                   | 2,000 | 0,064 | 1,994 | 0,173 | -0,3  | -0,09 | 1,969 | 0,168 | 1,909 | 0,130 | -3,0  | -0,35 |

|                                                    |       |       |       |       |      |       |        |       |       |       |      |       |
|----------------------------------------------------|-------|-------|-------|-------|------|-------|--------|-------|-------|-------|------|-------|
| Amygdalopiriform transition area                   | 0,698 | 0,054 | 0,670 | 0,042 | -4,1 | -0,53 | 0,830  | 0,057 | 0,795 | 0,049 | -4,2 | -0,62 |
| Primary auditory cortex                            | 1,366 | 0,105 | 1,367 | 0,082 | 0,1  | 0,02  | 1,471  | 0,145 | 1,387 | 0,143 | -5,7 | -0,58 |
| Secondary auditory cortex: dorsal area             | 1,535 | 0,112 | 1,520 | 0,110 | -1,0 | -0,13 | 1,644  | 0,141 | 1,554 | 0,145 | -5,5 | -0,63 |
| Secondary auditory cortex: ventral area            | 1,543 | 0,106 | 1,541 | 0,097 | -0,1 | -0,02 | 1,653  | 0,176 | 1,540 | 0,162 | -6,8 | -0,64 |
| Caudomedial entorhinal cortex                      | 3,888 | 0,362 | 3,856 | 0,159 | -0,8 | -0,09 | 4,832  | 0,291 | 4,438 | 0,337 | -8,2 | -1,35 |
| Cingulum                                           | 0,624 | 0,023 | 0,615 | 0,045 | -1,5 | -0,40 | 0,714  | 0,060 | 0,682 | 0,057 | -4,5 | -0,53 |
| Clastrum                                           | 0,232 | 0,021 | 0,232 | 0,017 | -0,1 | -0,01 | 0,268  | 0,021 | 0,261 | 0,021 | -2,8 | -0,36 |
| Cortex-amygdala transition zones                   | 0,893 | 0,049 | 0,876 | 0,099 | -2,0 | -0,36 | 1,053  | 0,096 | 1,017 | 0,106 | -3,4 | -0,37 |
| Clastrum: dorsal part                              | 0,309 | 0,028 | 0,302 | 0,024 | -2,3 | -0,26 | 0,328  | 0,028 | 0,317 | 0,021 | -3,2 | -0,38 |
| Dorsal nucleus of the endopiriform                 | 1,266 | 0,103 | 1,231 | 0,129 | -2,8 | -0,34 | 1,396  | 0,083 | 1,346 | 0,098 | -3,6 | -0,60 |
| Dorsal intermediate entorhinal cortex              | 1,496 | 0,119 | 1,462 | 0,093 | -2,3 | -0,29 | 1,740  | 0,107 | 1,659 | 0,088 | -4,7 | -0,76 |
| Dorsolateral entorhinal cortex                     | 2,036 | 0,168 | 2,018 | 0,121 | -0,9 | -0,11 | 2,340  | 0,153 | 2,224 | 0,129 | -5,0 | -0,76 |
| Dorsolateral orbital cortex                        | 0,760 | 0,042 | 0,765 | 0,066 | 0,6  | 0,12  | 0,852  | 0,063 | 0,824 | 0,088 | -3,3 | -0,45 |
| Dorsal tenia tecta                                 | 0,714 | 0,053 | 0,710 | 0,049 | -0,6 | -0,08 | 0,781  | 0,049 | 0,741 | 0,050 | -5,1 | -0,81 |
| Ectorhinal cortex                                  | 2,590 | 0,195 | 2,575 | 0,134 | -0,6 | -0,08 | 2,818  | 0,186 | 2,617 | 0,210 | -7,1 | -1,08 |
| Frontal cortex: area 3                             | 0,677 | 0,038 | 0,682 | 0,034 | 0,7  | 0,12  | 0,722  | 0,051 | 0,702 | 0,048 | -2,8 | -0,40 |
| Frontal association cortex                         | 6,432 | 0,259 | 6,439 | 0,374 | 0,1  | 0,03  | 6,630  | 0,370 | 6,383 | 0,523 | -3,7 | -0,67 |
| Intermediate nucleus of the endopiriform claustrum | 0,539 | 0,043 | 0,530 | 0,053 | -1,7 | -0,21 | 0,635  | 0,037 | 0,605 | 0,048 | -4,7 | -0,82 |
| Insular region: not subdivided                     | 7,212 | 0,586 | 7,160 | 0,639 | -0,7 | -0,09 | 7,625  | 0,459 | 7,323 | 0,501 | -4,0 | -0,66 |
| Lateral orbital cortex                             | 2,724 | 0,211 | 2,748 | 0,233 | 0,9  | 0,11  | 2,955  | 0,143 | 2,878 | 0,268 | -2,6 | -0,54 |
| Lateral parietal association cortex                | 0,183 | 0,010 | 0,182 | 0,018 | -0,9 | -0,17 | 0,191  | 0,017 | 0,178 | 0,020 | -6,6 | -0,73 |
| Primary motor cortex                               | 6,111 | 0,222 | 6,100 | 0,353 | -0,2 | -0,05 | 6,495  | 0,524 | 6,251 | 0,491 | -3,8 | -0,47 |
| Secondary motor cortex                             | 6,056 | 0,200 | 6,085 | 0,418 | 0,5  | 0,14  | 6,226  | 0,511 | 5,937 | 0,455 | -4,6 | -0,57 |
| Medial entorhinal cortex                           | 0,528 | 0,049 | 0,518 | 0,018 | -2,0 | -0,21 | 0,667  | 0,050 | 0,627 | 0,045 | -6,1 | -0,82 |
| Medial orbital cortex                              | 1,411 | 0,083 | 1,419 | 0,120 | 0,6  | 0,10  | 1,394  | 0,090 | 1,346 | 0,106 | -3,4 | -0,53 |
| Medial parietal association cortex                 | 0,329 | 0,017 | 0,331 | 0,042 | 0,8  | 0,15  | 0,357  | 0,031 | 0,333 | 0,039 | -6,8 | -0,78 |
| Piriform cortex                                    | 9,134 | 0,674 | 8,885 | 0,812 | -2,7 | -0,37 | 10,430 | 0,494 | 9,947 | 0,722 | -4,6 | -0,98 |
| Posterolateral cortical amygdaloid area            | 1,002 | 0,074 | 0,940 | 0,080 | -6,2 | -0,83 | 1,184  | 0,059 | 1,130 | 0,050 | -4,6 | -0,91 |



|                                                |       |       |       |       |      |       |        |       |        |       |      |       |
|------------------------------------------------|-------|-------|-------|-------|------|-------|--------|-------|--------|-------|------|-------|
| Posteromedial cortical amygdaloid area         | 0,967 | 0,075 | 0,929 | 0,074 | -4,0 | -0,51 | 1,147  | 0,060 | 1,120  | 0,053 | -2,3 | -0,44 |
| Perirhinal cortex                              | 2,380 | 0,185 | 2,352 | 0,128 | -1,2 | -0,15 | 2,647  | 0,162 | 2,487  | 0,183 | -6,0 | -0,98 |
| Parietal cortex: posterior area: rostral part  | 0,116 | 0,007 | 0,113 | 0,006 | -3,0 | -0,48 | 0,122  | 0,010 | 0,113  | 0,012 | -7,5 | -0,89 |
| Rostral amygdalopiriform area                  | 0,526 | 0,042 | 0,494 | 0,032 | -6,0 | -0,75 | 0,618  | 0,032 | 0,588  | 0,031 | -5,0 | -0,95 |
| Primary somatosensory cortex                   | 4,109 | 0,253 | 4,099 | 0,203 | -0,2 | -0,04 | 4,405  | 0,317 | 4,229  | 0,315 | -4,0 | -0,56 |
| Primary somatosensory cortex: barrel field     | 9,881 | 0,728 | 9,697 | 0,524 | -1,9 | -0,25 | 10,869 | 0,980 | 10,253 | 0,928 | -5,7 | -0,63 |
| Primary somatosensory cortex: dysgranular zone | 0,302 | 0,020 | 0,296 | 0,012 | -1,9 | -0,28 | 0,324  | 0,026 | 0,307  | 0,026 | -5,2 | -0,67 |
| Primary somatosensory cortex: forelimb region  | 3,558 | 0,208 | 3,504 | 0,154 | -1,5 | -0,26 | 3,906  | 0,345 | 3,702  | 0,335 | -5,2 | -0,59 |
| Primary somatosensory cortex: hindlimb region  | 2,418 | 0,113 | 2,388 | 0,208 | -1,3 | -0,27 | 2,615  | 0,234 | 2,466  | 0,224 | -5,7 | -0,63 |
| Primary somatosensory cortex: jaw region       | 0,706 | 0,044 | 0,709 | 0,030 | 0,4  | 0,06  | 0,771  | 0,062 | 0,744  | 0,061 | -3,4 | -0,42 |
| Primary somatosensory cortex: shoulder region  | 0,206 | 0,014 | 0,199 | 0,012 | -3,2 | -0,49 | 0,218  | 0,019 | 0,202  | 0,019 | -7,2 | -0,83 |
| Primary somatosensory cortex: trunk region     | 0,461 | 0,025 | 0,454 | 0,040 | -1,6 | -0,29 | 0,483  | 0,042 | 0,451  | 0,049 | -6,7 | -0,78 |
| Primary somatosensory cortex: upper lip region | 5,418 | 0,343 | 5,385 | 0,218 | -0,6 | -0,10 | 5,824  | 0,459 | 5,567  | 0,422 | -4,4 | -0,56 |
| Secondary somatosensory cortex                 | 6,276 | 0,474 | 6,192 | 0,420 | -1,3 | -0,18 | 6,659  | 0,601 | 6,289  | 0,485 | -5,6 | -0,61 |
| Temporal association area                      | 2,499 | 0,183 | 2,499 | 0,118 | 0,0  | 0,00  | 2,692  | 0,198 | 2,498  | 0,209 | -7,2 | -0,98 |
| Primary visual cortex                          | 2,129 | 0,179 | 2,075 | 0,112 | -2,5 | -0,30 | 2,303  | 0,160 | 2,138  | 0,196 | -7,2 | -1,03 |
| Primary visual cortex: binocular area          | 1,891 | 0,138 | 1,835 | 0,118 | -3,0 | -0,41 | 1,984  | 0,129 | 1,875  | 0,202 | -5,5 | -0,85 |
| Primary visual cortex: monocular area          | 1,965 | 0,128 | 1,890 | 0,067 | -3,8 | -0,59 | 2,010  | 0,161 | 1,907  | 0,185 | -5,1 | -0,64 |
| Secondary visual cortex: lateral area          | 2,430 | 0,195 | 2,393 | 0,142 | -1,5 | -0,19 | 2,617  | 0,170 | 2,461  | 0,249 | -6,0 | -0,92 |
| Secondary visual cortex: mediolateral area     | 0,944 | 0,061 | 0,922 | 0,054 | -2,3 | -0,36 | 0,959  | 0,092 | 0,912  | 0,093 | -5,0 | -0,52 |
| Secondary visual cortex: mediomedial area      | 1,335 | 0,081 | 1,317 | 0,086 | -1,3 | -0,22 | 1,392  | 0,121 | 1,332  | 0,131 | -4,3 | -0,50 |
| Clastrum: ventral part                         | 0,556 | 0,044 | 0,538 | 0,051 | -3,3 | -0,41 | 0,584  | 0,042 | 0,571  | 0,042 | -2,3 | -0,32 |
| Ventral nucleus of the endopiriform claustrum  | 0,388 | 0,032 | 0,368 | 0,042 | -5,1 | -0,61 | 0,440  | 0,031 | 0,420  | 0,031 | -4,4 | -0,62 |
| Ventral intermediate entorhinal cortex         | 0,787 | 0,063 | 0,767 | 0,040 | -2,5 | -0,32 | 0,951  | 0,067 | 0,905  | 0,058 | -4,9 | -0,70 |
| Ventral orbital cortex                         | 1,254 | 0,065 | 1,261 | 0,090 | 0,6  | 0,12  | 1,311  | 0,075 | 1,279  | 0,117 | -2,4 | -0,42 |
| Ventral tenia tecta                            | 0,120 | 0,010 | 0,121 | 0,009 | 0,4  | 0,06  | 0,140  | 0,011 | 0,132  | 0,012 | -5,7 | -0,73 |

| Atlas ROI                           | Absolute volumes (mm3) |        |        |             |       |          | Relative volumes (% total brain volume) |       |        |             |       |          |
|-------------------------------------|------------------------|--------|--------|-------------|-------|----------|-----------------------------------------|-------|--------|-------------|-------|----------|
|                                     | Mixed-model ANOVA      |        |        |             |       |          | Mixed-model ANOVA                       |       |        |             |       |          |
|                                     | F-statistic            |        |        | FDR-q value |       |          | F-statistic                             |       |        | FDR-q value |       |          |
|                                     | Age                    | Tx     | Age:Tx | q-Age       | q-Tx  | q-Age:Tx | Age                                     | Tx    | Age:Tx | q-Age       | q-Tx  | q-Age:Tx |
| amygdala                            | 35,386                 | 7,594  | 0,239  | 0,000       | 0,041 | 0,719    | 2,141                                   | 1,306 | 0,992  | 0,188       | 0,805 | 0,988    |
| anterior commissure: pars anterior  | 57,793                 | 5,809  | 3,175  | 0,000       | 0,064 | 0,523    | 8,814                                   | 0,001 | 0,609  | 0,009       | 0,992 | 0,988    |
| anterior commissure: pars posterior | 109,944                | 9,452  | 1,022  | 0,000       | 0,029 | 0,535    | 40,929                                  | 0,578 | 0,557  | 0,000       | 0,805 | 0,988    |
| basal forebrain                     | 26,268                 | 6,407  | 0,292  | 0,000       | 0,058 | 0,714    | 0,002                                   | 0,388 | 0,478  | 0,979       | 0,820 | 0,988    |
| bed nucleus of stria terminalis     | 30,635                 | 4,472  | 0,840  | 0,000       | 0,094 | 0,576    | 1,089                                   | 0,067 | 0,016  | 0,356       | 0,949 | 0,988    |
| cerebellar peduncle: inferior       | 111,017                | 4,710  | 0,010  | 0,000       | 0,090 | 0,939    | 10,533                                  | 0,423 | 1,792  | 0,005       | 0,805 | 0,988    |
| cerebellar peduncle: middle         | 119,818                | 11,450 | 3,802  | 0,000       | 0,022 | 0,523    | 56,930                                  | 1,728 | 0,669  | 0,000       | 0,805 | 0,988    |
| cerebellar peduncle: superior       | 98,921                 | 11,529 | 2,314  | 0,000       | 0,022 | 0,523    | 31,577                                  | 1,819 | 0,098  | 0,000       | 0,805 | 0,988    |
| cerebral aqueduct                   | 3,437                  | 7,629  | 4,191  | 0,101       | 0,041 | 0,523    | 10,948                                  | 0,916 | 1,508  | 0,004       | 0,805 | 0,988    |
| cerebral peduncle                   | 177,074                | 9,342  | 0,434  | 0,000       | 0,029 | 0,646    | 114,035                                 | 0,622 | 1,176  | 0,000       | 0,805 | 0,988    |
| colliculus: inferior                | 72,194                 | 8,207  | 1,957  | 0,000       | 0,035 | 0,523    | 8,479                                   | 0,058 | 0,001  | 0,010       | 0,949 | 0,988    |
| colliculus: superior                | 43,544                 | 5,764  | 0,624  | 0,000       | 0,064 | 0,592    | 0,807                                   | 0,007 | 0,377  | 0,417       | 0,991 | 0,988    |
| corpus callosum                     | 41,058                 | 6,272  | 2,303  | 0,000       | 0,060 | 0,523    | 7,150                                   | 0,599 | 0,655  | 0,016       | 0,805 | 0,988    |
| corticospinal tract/pyramids        | 64,439                 | 1,844  | 0,000  | 0,000       | 0,258 | 0,983    | 8,667                                   | 0,716 | 1,297  | 0,009       | 0,805 | 0,988    |
| cuneate nucleus                     | 0,022                  | 0,063  | 0,148  | 0,899       | 0,814 | 0,782    | 14,301                                  | 2,962 | 0,963  | 0,001       | 0,793 | 0,988    |
| dentate gyrus of hippocampus        | 76,885                 | 10,771 | 1,753  | 0,000       | 0,022 | 0,523    | 17,298                                  | 1,695 | 0,003  | 0,001       | 0,805 | 0,988    |
| facial nerve (cranial nerve 7)      | 97,738                 | 4,956  | 0,628  | 0,000       | 0,086 | 0,592    | 23,375                                  | 0,001 | 0,240  | 0,000       | 0,992 | 0,988    |
| fasciculus retroflexus              | 67,379                 | 8,861  | 3,517  | 0,000       | 0,032 | 0,523    | 11,107                                  | 0,483 | 0,695  | 0,004       | 0,805 | 0,988    |
| fimbria                             | 56,652                 | 7,924  | 1,567  | 0,000       | 0,037 | 0,523    | 12,786                                  | 1,084 | 0,015  | 0,002       | 0,805 | 0,988    |
| fornix                              | 52,937                 | 8,752  | 0,676  | 0,000       | 0,032 | 0,586    | 5,903                                   | 0,961 | 0,315  | 0,029       | 0,805 | 0,988    |
| fourth ventricle                    | 6,909                  | 9,567  | 2,094  | 0,021       | 0,029 | 0,523    | 2,427                                   | 1,801 | 0,177  | 0,163       | 0,805 | 0,988    |
| fundus of striatum                  | 30,168                 | 8,489  | 0,072  | 0,000       | 0,033 | 0,824    | 0,899                                   | 2,259 | 1,733  | 0,398       | 0,805 | 0,988    |

|                                                 |         |        |       |       |       |       |         |        |       |       |       |       |
|-------------------------------------------------|---------|--------|-------|-------|-------|-------|---------|--------|-------|-------|-------|-------|
| globus pallidus                                 | 177,803 | 18,208 | 1,560 | 0,000 | 0,008 | 0,523 | 212,493 | 12,178 | 0,160 | 0,000 | 0,074 | 0,988 |
| habenular commissure                            | 21,359  | 0,009  | 0,004 | 0,000 | 0,933 | 0,963 | 0,084   | 2,946  | 0,835 | 0,804 | 0,793 | 0,988 |
| hippocampus                                     | 93,494  | 9,325  | 1,912 | 0,000 | 0,029 | 0,523 | 26,530  | 0,437  | 0,001 | 0,000 | 0,805 | 0,988 |
| hypothalamus                                    | 34,219  | 4,909  | 0,243 | 0,000 | 0,086 | 0,719 | 0,168   | 0,000  | 0,524 | 0,721 | 0,995 | 0,988 |
| inferior olivary complex                        | 43,669  | 0,639  | 0,033 | 0,000 | 0,495 | 0,878 | 5,328   | 0,973  | 0,445 | 0,037 | 0,805 | 0,988 |
| internal capsule                                | 135,420 | 11,324 | 0,735 | 0,000 | 0,022 | 0,585 | 146,064 | 5,561  | 0,352 | 0,000 | 0,648 | 0,988 |
| interpeduncular nucleus                         | 26,136  | 3,314  | 0,083 | 0,000 | 0,147 | 0,823 | 3,613   | 0,212  | 0,272 | 0,086 | 0,896 | 0,988 |
| lateral olfactory tract                         | 13,859  | 7,973  | 2,466 | 0,001 | 0,037 | 0,523 | 20,307  | 0,741  | 0,466 | 0,000 | 0,805 | 0,988 |
| lateral septum                                  | 39,107  | 5,968  | 1,048 | 0,000 | 0,064 | 0,530 | 1,718   | 0,141  | 0,018 | 0,240 | 0,918 | 0,988 |
| lateral ventricle                               | 24,221  | 4,768  | 1,899 | 0,000 | 0,090 | 0,523 | 0,125   | 0,142  | 0,330 | 0,759 | 0,918 | 0,988 |
| mammillary bodies                               | 69,565  | 0,492  | 0,227 | 0,000 | 0,535 | 0,724 | 13,037  | 1,459  | 2,123 | 0,002 | 0,805 | 0,988 |
| mammillothalamic tract                          | 24,866  | 8,802  | 1,473 | 0,000 | 0,032 | 0,523 | 4,571   | 0,176  | 0,039 | 0,053 | 0,908 | 0,988 |
| medial lemniscus/medial longitudinal fasciculus | 135,201 | 6,969  | 0,870 | 0,000 | 0,049 | 0,569 | 37,272  | 0,187  | 0,661 | 0,000 | 0,908 | 0,988 |
| medial septum                                   | 42,156  | 5,896  | 0,086 | 0,000 | 0,064 | 0,823 | 1,459   | 0,094  | 0,816 | 0,280 | 0,938 | 0,988 |
| medulla                                         | 29,122  | 2,307  | 0,055 | 0,000 | 0,209 | 0,843 | 0,251   | 0,782  | 0,948 | 0,665 | 0,805 | 0,988 |
| midbrain                                        | 108,476 | 11,023 | 1,766 | 0,000 | 0,022 | 0,523 | 43,658  | 1,688  | 0,000 | 0,000 | 0,805 | 0,988 |
| nucleus accumbens                               | 53,218  | 4,819  | 0,760 | 0,000 | 0,089 | 0,585 | 5,491   | 0,017  | 0,231 | 0,035 | 0,981 | 0,988 |
| olfactory bulbs                                 | 0,389   | 8,473  | 0,818 | 0,593 | 0,033 | 0,577 | 69,413  | 3,424  | 0,024 | 0,000 | 0,728 | 0,988 |
| olfactory tubercle                              | 79,156  | 3,175  | 0,739 | 0,000 | 0,147 | 0,585 | 14,420  | 0,339  | 0,154 | 0,001 | 0,836 | 0,988 |
| optic tract                                     | 140,678 | 11,016 | 0,806 | 0,000 | 0,022 | 0,577 | 49,918  | 0,516  | 0,823 | 0,000 | 0,805 | 0,988 |
| periaqueductal grey                             | 37,033  | 11,059 | 1,481 | 0,000 | 0,022 | 0,523 | 0,000   | 1,124  | 0,011 | 0,993 | 0,805 | 0,988 |
| pons                                            | 180,490 | 13,293 | 1,253 | 0,000 | 0,018 | 0,524 | 75,371  | 0,897  | 0,494 | 0,000 | 0,805 | 0,988 |
| pontine nucleus                                 | 99,663  | 3,204  | 0,708 | 0,000 | 0,147 | 0,586 | 27,831  | 0,118  | 0,064 | 0,000 | 0,925 | 0,988 |
| posterior commissure                            | 16,618  | 5,335  | 3,054 | 0,001 | 0,075 | 0,523 | 3,175   | 0,001  | 0,640 | 0,108 | 0,992 | 0,988 |
| pre-para subiculum                              | 20,776  | 4,632  | 1,101 | 0,000 | 0,090 | 0,530 | 0,974   | 0,000  | 0,005 | 0,384 | 0,995 | 0,988 |
| stratum granulosum of hippocampus               | 68,893  | 14,105 | 2,015 | 0,000 | 0,015 | 0,523 | 8,385   | 2,880  | 0,013 | 0,010 | 0,793 | 0,988 |
| stria medullaris                                | 35,737  | 8,648  | 0,968 | 0,000 | 0,033 | 0,541 | 1,579   | 0,118  | 0,350 | 0,260 | 0,925 | 0,988 |
| stria terminalis                                | 71,188  | 6,988  | 0,529 | 0,000 | 0,049 | 0,615 | 46,153  | 1,980  | 0,139 | 0,000 | 0,805 | 0,988 |

|                                                   |         |        |       |       |       |       |        |        |       |       |       |       |
|---------------------------------------------------|---------|--------|-------|-------|-------|-------|--------|--------|-------|-------|-------|-------|
| striatum                                          | 133,162 | 5,145  | 1,276 | 0,000 | 0,079 | 0,524 | 85,640 | 0,104  | 0,107 | 0,000 | 0,931 | 0,988 |
| subependymale zone / rhinocele                    | 0,010   | 6,009  | 1,805 | 0,927 | 0,064 | 0,523 | 58,970 | 0,174  | 0,175 | 0,000 | 0,908 | 0,988 |
| superior olivary complex                          | 59,215  | 2,739  | 0,564 | 0,000 | 0,176 | 0,612 | 13,335 | 0,085  | 0,057 | 0,002 | 0,938 | 0,988 |
| thalamus                                          | 51,586  | 8,992  | 1,186 | 0,000 | 0,032 | 0,527 | 4,101  | 0,734  | 0,156 | 0,067 | 0,805 | 0,988 |
| third ventricle                                   | 18,623  | 5,609  | 0,534 | 0,000 | 0,068 | 0,615 | 4,476  | 0,002  | 0,295 | 0,056 | 0,992 | 0,988 |
| ventral tegmental decussation                     | 41,500  | 6,989  | 0,689 | 0,000 | 0,049 | 0,586 | 7,963  | 1,417  | 0,030 | 0,012 | 0,805 | 0,988 |
| lobules 1-2: lingula and central lobule (ventral) | 35,030  | 26,846 | 6,312 | 0,000 | 0,001 | 0,523 | 3,214  | 15,725 | 2,627 | 0,106 | 0,029 | 0,988 |
| lobule 3: central lobule (dorsal)                 | 73,122  | 14,055 | 1,160 | 0,000 | 0,015 | 0,529 | 27,219 | 5,242  | 0,002 | 0,000 | 0,649 | 0,988 |
| lobules 4-5: culmen (ventral and dorsal)          | 54,517  | 3,017  | 1,442 | 0,000 | 0,159 | 0,523 | 12,015 | 0,031  | 0,056 | 0,003 | 0,972 | 0,988 |
| lobule 6: declive                                 | 14,183  | 0,778  | 3,682 | 0,001 | 0,463 | 0,523 | 0,209  | 0,854  | 1,254 | 0,690 | 0,805 | 0,988 |
| lobule 7: tuber (or folium)                       | 0,039   | 0,566  | 2,807 | 0,866 | 0,516 | 0,523 | 10,488 | 0,420  | 1,269 | 0,005 | 0,805 | 0,988 |
| lobule 8: pyramis                                 | 0,129   | 0,306  | 1,457 | 0,759 | 0,619 | 0,523 | 13,026 | 0,605  | 0,456 | 0,002 | 0,805 | 0,988 |
| lobule 9: uvula                                   | 2,276   | 0,603  | 0,922 | 0,185 | 0,503 | 0,552 | 33,517 | 0,988  | 0,028 | 0,000 | 0,805 | 0,988 |
| lobule 10: nodulus                                | 0,087   | 0,404  | 0,395 | 0,800 | 0,573 | 0,663 | 8,222  | 0,429  | 0,001 | 0,011 | 0,805 | 0,988 |
| anterior lobule (lobules 4-5)                     | 49,888  | 11,140 | 1,742 | 0,000 | 0,022 | 0,523 | 12,158 | 3,539  | 0,143 | 0,003 | 0,728 | 0,988 |
| simple lobule (lobule 6)                          | 33,671  | 5,821  | 3,062 | 0,000 | 0,064 | 0,523 | 2,972  | 0,440  | 0,875 | 0,120 | 0,805 | 0,988 |
| crus 1: ansiform lobule (lobule 6)                | 6,369   | 3,179  | 2,060 | 0,027 | 0,147 | 0,523 | 2,297  | 0,037  | 0,446 | 0,174 | 0,964 | 0,988 |
| crus 2: ansiform lobule (lobule 7)                | 0,612   | 0,632  | 1,607 | 0,503 | 0,495 | 0,523 | 9,402  | 0,580  | 0,371 | 0,007 | 0,805 | 0,988 |
| paramedian lobule (lobule 7)                      | 0,251   | 0,208  | 0,365 | 0,679 | 0,682 | 0,667 | 10,850 | 3,997  | 0,003 | 0,004 | 0,714 | 0,988 |
| copula: pyramis (lobule 8)                        | 1,516   | 0,064  | 1,446 | 0,278 | 0,814 | 0,523 | 7,850  | 2,003  | 0,182 | 0,012 | 0,805 | 0,988 |
| flocculus (FL)                                    | 15,441  | 6,870  | 0,431 | 0,001 | 0,049 | 0,646 | 0,856  | 0,479  | 0,226 | 0,408 | 0,805 | 0,988 |
| paraflocculus (PFL)                               | 0,168   | 2,692  | 0,078 | 0,725 | 0,177 | 0,823 | 39,957 | 1,264  | 0,884 | 0,000 | 0,805 | 0,988 |
| trunk of arbor vita                               | 129,942 | 8,424  | 2,615 | 0,000 | 0,033 | 0,523 | 49,581 | 0,926  | 0,164 | 0,000 | 0,805 | 0,988 |
| lobule 1-2 white matter                           | 48,075  | 28,398 | 6,052 | 0,000 | 0,001 | 0,523 | 13,287 | 17,488 | 2,417 | 0,002 | 0,029 | 0,988 |
| lobule 3 white matter                             | 67,199  | 12,269 | 1,558 | 0,000 | 0,022 | 0,523 | 23,538 | 4,164  | 0,050 | 0,000 | 0,714 | 0,988 |
| trunk of lobules 1-3 white matter                 | 178,403 | 15,607 | 2,044 | 0,000 | 0,013 | 0,523 | 91,584 | 4,849  | 0,032 | 0,000 | 0,667 | 0,988 |
| lobules 4-5 white matter                          | 45,391  | 1,414  | 2,072 | 0,000 | 0,310 | 0,523 | 8,583  | 0,495  | 0,369 | 0,010 | 0,805 | 0,988 |
| lobules 6-7 white matter                          | 12,022  | 0,328  | 5,874 | 0,003 | 0,609 | 0,523 | 0,004  | 0,869  | 3,143 | 0,968 | 0,805 | 0,988 |

|                                             |         |        |       |       |       |       |         |       |       |       |       |       |
|---------------------------------------------|---------|--------|-------|-------|-------|-------|---------|-------|-------|-------|-------|-------|
| lobule 8 white matter                       | 0,002   | 0,499  | 1,999 | 0,968 | 0,535 | 0,523 | 8,576   | 0,297 | 0,828 | 0,010 | 0,859 | 0,988 |
| trunk of lobules 6-8 white matter           | 4,343   | 0,199  | 3,787 | 0,067 | 0,684 | 0,523 | 0,961   | 0,689 | 1,537 | 0,385 | 0,805 | 0,988 |
| lobule 9 white matter                       | 0,890   | 0,672  | 0,759 | 0,412 | 0,495 | 0,585 | 21,360  | 0,501 | 0,041 | 0,000 | 0,805 | 0,988 |
| lobule 10 white matter                      | 0,194   | 0,236  | 0,200 | 0,712 | 0,664 | 0,736 | 6,097   | 0,469 | 0,017 | 0,026 | 0,805 | 0,988 |
| anterior lobule white matter                | 64,164  | 7,006  | 0,696 | 0,000 | 0,049 | 0,586 | 23,878  | 1,519 | 0,009 | 0,000 | 0,805 | 0,988 |
| simple lobule white matter                  | 38,779  | 6,914  | 3,356 | 0,000 | 0,049 | 0,523 | 6,910   | 1,153 | 1,161 | 0,018 | 0,805 | 0,988 |
| crus 1 white matter                         | 16,466  | 4,354  | 2,792 | 0,001 | 0,097 | 0,523 | 0,765   | 0,614 | 1,003 | 0,428 | 0,805 | 0,988 |
| trunk of simple and crus 1 white matter     | 48,088  | 4,603  | 5,257 | 0,000 | 0,090 | 0,523 | 16,991  | 0,664 | 2,562 | 0,001 | 0,805 | 0,988 |
| crus 2 white matter                         | 0,733   | 0,382  | 2,212 | 0,459 | 0,581 | 0,523 | 5,193   | 0,496 | 0,899 | 0,039 | 0,805 | 0,988 |
| paramedian lobule                           | 0,172   | 0,423  | 0,683 | 0,725 | 0,566 | 0,586 | 7,428   | 3,845 | 0,078 | 0,015 | 0,714 | 0,988 |
| trunk of crus 2 and paramedian white matter | 4,957   | 0,007  | 2,411 | 0,050 | 0,936 | 0,523 | 1,148   | 1,648 | 0,780 | 0,344 | 0,805 | 0,988 |
| copula white matter                         | 0,123   | 1,325  | 3,077 | 0,762 | 0,325 | 0,523 | 12,354  | 0,239 | 1,021 | 0,003 | 0,884 | 0,988 |
| paraflocculus white matter                  | 0,583   | 1,749  | 0,137 | 0,508 | 0,263 | 0,788 | 26,322  | 1,166 | 0,512 | 0,000 | 0,805 | 0,988 |
| flocculus white matter                      | 19,886  | 5,977  | 0,250 | 0,000 | 0,064 | 0,719 | 0,731   | 0,990 | 0,202 | 0,437 | 0,805 | 0,988 |
| dentate nucleus                             | 135,214 | 6,440  | 1,240 | 0,000 | 0,058 | 0,524 | 67,314  | 0,672 | 0,000 | 0,000 | 0,805 | 0,988 |
| nucleus interpositus                        | 214,477 | 15,550 | 1,884 | 0,000 | 0,013 | 0,523 | 151,789 | 6,439 | 0,022 | 0,000 | 0,511 | 0,988 |
| fastigial nucleus                           | 145,929 | 9,938  | 2,224 | 0,000 | 0,028 | 0,523 | 71,392  | 2,372 | 0,135 | 0,000 | 0,805 | 0,988 |
| Cingulate cortex: area 24a                  | 1,731   | 1,183  | 0,439 | 0,243 | 0,354 | 0,646 | 11,056  | 0,372 | 0,017 | 0,004 | 0,820 | 0,988 |
| Cingulate cortex: area 24a'                 | 2,766   | 0,657  | 0,387 | 0,141 | 0,495 | 0,663 | 8,464   | 0,962 | 0,030 | 0,010 | 0,805 | 0,988 |
| Cingulate cortex: area 24b                  | 0,214   | 1,865  | 0,365 | 0,703 | 0,257 | 0,667 | 47,946  | 0,446 | 0,141 | 0,000 | 0,805 | 0,988 |
| Cingulate cortex: area 24b'                 | 1,746   | 0,551  | 0,251 | 0,243 | 0,519 | 0,719 | 12,996  | 1,314 | 0,117 | 0,002 | 0,805 | 0,988 |
| Cingulate cortex: area 25                   | 0,869   | 1,606  | 3,479 | 0,415 | 0,281 | 0,523 | 30,473  | 1,239 | 1,284 | 0,000 | 0,805 | 0,988 |
| Cingulate cortex: area 29a                  | 3,519   | 0,114  | 0,002 | 0,098 | 0,757 | 0,972 | 14,215  | 4,020 | 0,919 | 0,001 | 0,714 | 0,988 |
| Cingulate cortex: area 29b                  | 3,549   | 1,458  | 0,082 | 0,097 | 0,307 | 0,823 | 18,775  | 1,037 | 0,700 | 0,000 | 0,805 | 0,988 |
| Cingulate cortex: area 29c                  | 2,957   | 0,125  | 0,238 | 0,129 | 0,750 | 0,719 | 13,753  | 6,528 | 2,081 | 0,002 | 0,511 | 0,988 |
| Cingulate cortex: area 30                   | 3,405   | 0,540  | 1,115 | 0,102 | 0,520 | 0,530 | 11,084  | 1,796 | 0,125 | 0,004 | 0,805 | 0,988 |
| Cingulate cortex: area 32                   | 0,902   | 1,053  | 0,799 | 0,411 | 0,379 | 0,577 | 58,449  | 1,471 | 0,000 | 0,000 | 0,805 | 0,988 |
| Amygdalopiriform transition area            | 62,197  | 5,781  | 0,519 | 0,000 | 0,064 | 0,615 | 11,873  | 0,009 | 0,575 | 0,003 | 0,987 | 0,988 |

|                                                    |        |        |       |       |       |       |        |       |       |       |       |       |
|----------------------------------------------------|--------|--------|-------|-------|-------|-------|--------|-------|-------|-------|-------|-------|
| Primary auditory cortex                            | 2,537  | 1,725  | 1,786 | 0,160 | 0,265 | 0,523 | 21,793 | 0,547 | 0,914 | 0,000 | 0,805 | 0,988 |
| Secondary auditory cortex: dorsal area             | 3,028  | 2,349  | 1,428 | 0,125 | 0,208 | 0,523 | 22,915 | 0,218 | 0,413 | 0,000 | 0,896 | 0,988 |
| Secondary auditory cortex: ventral area            | 1,354  | 2,188  | 1,997 | 0,305 | 0,223 | 0,523 | 25,745 | 0,174 | 1,019 | 0,000 | 0,908 | 0,988 |
| Caudomedial entorhinal cortex                      | 55,742 | 6,040  | 4,472 | 0,000 | 0,064 | 0,523 | 12,943 | 0,090 | 2,607 | 0,002 | 0,938 | 0,988 |
| Cingulum                                           | 24,736 | 3,267  | 1,539 | 0,000 | 0,147 | 0,523 | 0,020  | 0,150 | 0,095 | 0,911 | 0,918 | 0,988 |
| Clastrum                                           | 25,661 | 1,075  | 0,971 | 0,000 | 0,377 | 0,541 | 0,383  | 1,216 | 0,010 | 0,584 | 0,805 | 0,988 |
| Cortex-amygdala transition zones                   | 29,751 | 1,959  | 0,636 | 0,000 | 0,247 | 0,592 | 1,852  | 0,062 | 0,010 | 0,224 | 0,949 | 0,988 |
| Clastrum: dorsal part                              | 4,818  | 1,822  | 0,271 | 0,053 | 0,260 | 0,719 | 13,289 | 0,629 | 0,314 | 0,002 | 0,805 | 0,988 |
| Dorsal nucleus of the endopiriform                 | 13,760 | 2,906  | 0,544 | 0,001 | 0,163 | 0,615 | 1,833  | 0,041 | 0,105 | 0,224 | 0,962 | 0,988 |
| Dorsal intermediate entorhinal cortex              | 42,869 | 4,017  | 0,963 | 0,000 | 0,110 | 0,541 | 0,830  | 0,371 | 0,100 | 0,413 | 0,820 | 0,988 |
| Dorsolateral entorhinal cortex                     | 28,085 | 2,388  | 1,304 | 0,000 | 0,207 | 0,524 | 0,383  | 1,475 | 0,001 | 0,584 | 0,805 | 0,988 |
| Dorsolateral orbital cortex                        | 12,938 | 1,071  | 1,505 | 0,002 | 0,377 | 0,523 | 0,910  | 0,786 | 0,211 | 0,397 | 0,805 | 0,988 |
| Dorsal tenia tecta                                 | 10,380 | 3,546  | 2,594 | 0,005 | 0,138 | 0,523 | 11,167 | 0,275 | 0,502 | 0,004 | 0,863 | 0,988 |
| Ectorhinal cortex                                  | 4,043  | 3,473  | 2,556 | 0,077 | 0,140 | 0,523 | 46,912 | 0,509 | 1,470 | 0,000 | 0,805 | 0,988 |
| Frontal cortex: area 3                             | 5,747  | 1,190  | 1,817 | 0,035 | 0,354 | 0,523 | 34,806 | 4,684 | 0,347 | 0,000 | 0,667 | 0,988 |
| Frontal association cortex                         | 0,588  | 1,758  | 1,831 | 0,508 | 0,263 | 0,523 | 46,920 | 1,573 | 0,249 | 0,000 | 0,805 | 0,988 |
| Intermediate nucleus of the endopiriform claustrum | 35,029 | 3,628  | 1,650 | 0,000 | 0,134 | 0,523 | 2,142  | 0,005 | 0,115 | 0,188 | 0,992 | 0,988 |
| Insular region: not subdivided                     | 2,925  | 1,796  | 1,125 | 0,130 | 0,262 | 0,530 | 24,807 | 0,924 | 0,078 | 0,000 | 0,805 | 0,988 |
| Lateral orbital cortex                             | 6,868  | 0,632  | 1,182 | 0,022 | 0,495 | 0,527 | 8,385  | 2,328 | 0,142 | 0,010 | 0,805 | 0,988 |
| Lateral parietal association cortex                | 0,210  | 2,333  | 1,487 | 0,703 | 0,208 | 0,523 | 19,304 | 0,015 | 0,323 | 0,000 | 0,981 | 0,988 |
| Primary motor cortex                               | 4,267  | 1,868  | 1,626 | 0,069 | 0,257 | 0,523 | 24,624 | 1,275 | 0,181 | 0,000 | 0,805 | 0,988 |
| Secondary motor cortex                             | 0,076  | 1,765  | 2,260 | 0,810 | 0,263 | 0,523 | 43,066 | 1,028 | 0,481 | 0,000 | 0,805 | 0,988 |
| Medial entorhinal cortex                           | 78,834 | 4,701  | 2,019 | 0,000 | 0,090 | 0,523 | 26,923 | 0,018 | 0,134 | 0,000 | 0,981 | 0,988 |
| Medial orbital cortex                              | 1,441  | 0,681  | 1,085 | 0,290 | 0,495 | 0,530 | 58,176 | 1,939 | 0,042 | 0,000 | 0,805 | 0,988 |
| Medial parietal association cortex                 | 1,838  | 1,415  | 1,959 | 0,233 | 0,310 | 0,523 | 8,268  | 0,165 | 0,723 | 0,010 | 0,911 | 0,988 |
| Piriform cortex                                    | 27,896 | 4,362  | 1,048 | 0,000 | 0,097 | 0,530 | 0,035  | 0,000 | 0,007 | 0,880 | 0,995 | 0,988 |
| Posterolateral cortical amygdaloid area            | 82,658 | 10,832 | 0,131 | 0,000 | 0,022 | 0,790 | 12,501 | 0,833 | 1,892 | 0,002 | 0,805 | 0,988 |
| Posteromedial cortical amygdaloid area             | 78,750 | 4,077  | 0,070 | 0,000 | 0,108 | 0,824 | 16,244 | 0,427 | 2,128 | 0,001 | 0,805 | 0,988 |

|                                                |        |       |       |       |       |       |        |       |       |       |       |       |
|------------------------------------------------|--------|-------|-------|-------|-------|-------|--------|-------|-------|-------|-------|-------|
| Perirhinal cortex                              | 11,946 | 3,204 | 1,627 | 0,003 | 0,147 | 0,523 | 17,812 | 0,928 | 0,200 | 0,000 | 0,805 | 0,988 |
| Parietal cortex: posterior area: rostral part  | 1,006  | 5,263 | 1,475 | 0,384 | 0,076 | 0,523 | 25,269 | 0,441 | 0,191 | 0,000 | 0,805 | 0,988 |
| Rostral amygdalopiriform area                  | 69,771 | 9,885 | 0,123 | 0,000 | 0,028 | 0,793 | 9,032  | 0,707 | 1,979 | 0,008 | 0,805 | 0,988 |
| Primary somatosensory cortex                   | 5,770  | 2,054 | 1,732 | 0,035 | 0,238 | 0,523 | 37,759 | 2,371 | 0,404 | 0,000 | 0,805 | 0,988 |
| Primary somatosensory cortex: barrel field     | 8,110  | 3,235 | 1,325 | 0,013 | 0,147 | 0,524 | 9,473  | 0,012 | 0,203 | 0,007 | 0,981 | 0,988 |
| Primary somatosensory cortex: dysgranular zone | 5,629  | 3,524 | 1,311 | 0,037 | 0,138 | 0,524 | 25,059 | 0,080 | 0,106 | 0,000 | 0,939 | 0,988 |
| Primary somatosensory cortex: forelimb region  | 9,008  | 3,219 | 1,540 | 0,009 | 0,147 | 0,523 | 9,826  | 0,061 | 0,261 | 0,006 | 0,949 | 0,988 |
| Primary somatosensory cortex: hindlimb region  | 4,496  | 2,822 | 1,534 | 0,062 | 0,170 | 0,523 | 10,705 | 0,027 | 0,254 | 0,004 | 0,974 | 0,988 |
| Primary somatosensory cortex: jaw region       | 9,093  | 1,411 | 1,736 | 0,008 | 0,310 | 0,523 | 15,740 | 2,869 | 0,519 | 0,001 | 0,793 | 0,988 |
| Primary somatosensory cortex: shoulder region  | 2,174  | 5,442 | 1,399 | 0,192 | 0,072 | 0,523 | 19,542 | 0,517 | 0,136 | 0,000 | 0,805 | 0,988 |
| Primary somatosensory cortex: trunk region     | 0,528  | 2,989 | 1,395 | 0,529 | 0,159 | 0,523 | 20,004 | 0,002 | 0,236 | 0,000 | 0,992 | 0,988 |
| Primary somatosensory cortex: upper lip region | 5,878  | 2,405 | 1,669 | 0,034 | 0,207 | 0,523 | 34,897 | 1,561 | 0,346 | 0,000 | 0,805 | 0,988 |
| Secondary somatosensory cortex                 | 2,225  | 2,699 | 1,297 | 0,188 | 0,177 | 0,524 | 32,679 | 0,268 | 0,185 | 0,000 | 0,863 | 0,988 |
| Temporal association area                      | 2,233  | 3,273 | 3,175 | 0,188 | 0,147 | 0,523 | 57,279 | 0,444 | 2,855 | 0,000 | 0,805 | 0,988 |
| Primary visual cortex                          | 3,932  | 4,325 | 1,283 | 0,081 | 0,098 | 0,524 | 23,260 | 0,046 | 0,155 | 0,000 | 0,962 | 0,988 |
| Primary visual cortex: binocular area          | 1,796  | 3,402 | 0,653 | 0,237 | 0,144 | 0,592 | 25,128 | 0,012 | 0,001 | 0,000 | 0,981 | 0,988 |
| Primary visual cortex: monocular area          | 0,441  | 4,083 | 0,261 | 0,568 | 0,108 | 0,719 | 44,209 | 0,013 | 0,348 | 0,000 | 0,981 | 0,988 |
| Secondary visual cortex: lateral area          | 3,731  | 2,971 | 1,391 | 0,089 | 0,159 | 0,523 | 20,702 | 0,042 | 0,344 | 0,000 | 0,962 | 0,988 |
| Secondary visual cortex: mediolateral area     | 0,015  | 2,372 | 0,497 | 0,914 | 0,207 | 0,623 | 37,121 | 0,116 | 0,014 | 0,000 | 0,925 | 0,988 |
| Secondary visual cortex: mediomedial area      | 1,093  | 1,627 | 0,613 | 0,363 | 0,280 | 0,592 | 23,912 | 0,597 | 0,001 | 0,000 | 0,805 | 0,988 |
| Clastrum: ventral part                         | 4,984  | 2,048 | 0,091 | 0,050 | 0,238 | 0,823 | 12,289 | 0,283 | 0,811 | 0,003 | 0,863 | 0,988 |
| Ventral nucleus of the endopiriform claustrum  | 22,152 | 4,592 | 0,218 | 0,000 | 0,090 | 0,726 | 0,218  | 0,333 | 0,553 | 0,687 | 0,836 | 0,988 |
| Ventral intermediate entorhinal cortex         | 64,518 | 4,582 | 1,198 | 0,000 | 0,090 | 0,527 | 13,484 | 0,113 | 0,023 | 0,002 | 0,925 | 0,988 |
| Ventral orbital cortex                         | 2,107  | 0,634 | 1,063 | 0,198 | 0,495 | 0,530 | 33,950 | 3,600 | 0,038 | 0,000 | 0,728 | 0,988 |
| Ventral tenia tecta                            | 23,189 | 1,984 | 2,387 | 0,000 | 0,246 | 0,523 | 0,001  | 0,502 | 0,605 | 0,984 | 0,805 | 0,988 |

**Supplementary table 3:**  
**Differentially expressed gene (DEG) lists from RNAseq analysis of CD11B+ microglia**  
**from the cerebrum and cerebellum.**

| <i>CEREBRUM IL1 vs PBS</i> | <i>log2FoldC padj</i> | <i>Gene name</i>    | <i>CEREBELLUM IL1 vs PBS</i> | <i>log2FoldCh padj</i> | <i>Gene name</i>    |
|----------------------------|-----------------------|---------------------|------------------------------|------------------------|---------------------|
| ENSMUSG00000067219         | 5,362                 | 0,011 Nipal1        | ENSMUSG00000067219           | 6,013                  | 0,005 Nipal1        |
| ENSMUSG00000041481         | 4,892                 | 0,000 Serpina3g     | ENSMUSG00000041481           | 5,087                  | 0,000 Serpina3g     |
| ENSMUSG000000048534        | 4,745                 | 0,000 Jaml          | ENSMUSG000000032726          | 4,850                  | 0,016 Bmp8a         |
| ENSMUSG000000032068        | 4,679                 | 0,000 Plet1         | ENSMUSG000000054072          | 4,840                  | 0,000 ligp1         |
| ENSMUSG000000006179        | 4,622                 | 0,000 Prss16        | ENSMUSG000000078921          | 4,732                  | 0,000 Tgtp2         |
| ENSMUSG0000000041449       | 4,498                 | 0,000 Serpina3h     | ENSMUSG000000006179          | 4,704                  | 0,000 Prss16        |
| ENSMUSG0000000031780       | 4,469                 | 0,000 Ccl17         | ENSMUSG0000000031780         | 4,537                  | 0,000 Ccl17         |
| ENSMUSG000000079014        | 4,340                 | 0,000 Serpina3i     | ENSMUSG000000067261          | 4,397                  | 0,040 Foxd3         |
| ENSMUSG000000066363        | 4,275                 | 0,000 Serpina3f     | ENSMUSG000000032068          | 4,364                  | 0,000 Plet1         |
| ENSMUSG0000000085913       | 4,234                 | 0,026 Gm15601       | ENSMUSG000000068303          | 4,180                  | 0,017 Spr-ps1       |
| ENSMUSG000000091553        | 4,202                 | 0,000 Serpina3e-ps  | ENSMUSG000000078922          | 4,180                  | 0,000 Tgtp1         |
| ENSMUSG000000078922        | 4,110                 | 0,000 Tgtp1         | ENSMUSG000000092920          | 3,831                  | 0,001 Mirt2         |
| ENSMUSG0000000021553       | 4,088                 | 0,000 Slc28a3       | ENSMUSG000000056569          | 3,728                  | 0,000 Mpz           |
| ENSMUSG000000054072        | 3,905                 | 0,000 ligp1         | ENSMUSG000000021553          | 3,695                  | 0,001 Slc28a3       |
| ENSMUSG000000032726        | 3,862                 | 0,038 Bmp8a         | ENSMUSG000000041449          | 3,652                  | 0,000 Serpina3h     |
| ENSMUSG000000012428        | 3,677                 | 0,000 Steap4        | ENSMUSG000000048534          | 3,632                  | 0,000 Jaml          |
| ENSMUSG0000000101304       | 3,568                 | 0,000 Plet1os       | ENSMUSG000000023132          | 3,599                  | 0,000 Gzma          |
| ENSMUSG000000026073        | 3,433                 | 0,000 Il1r2         | ENSMUSG000000091553          | 3,551                  | 0,000 Serpina3e-ps  |
| ENSMUSG000000097848        | 3,357                 | 0,000 Gm807         | ENSMUSG000000012428          | 3,445                  | 0,000 Steap4        |
| ENSMUSG0000000039196       | 3,205                 | 0,000 Orm1          | ENSMUSG000000056290          | 3,425                  | 0,000 Ms4a4b        |
| ENSMUSG0000000085810       | 3,189                 | 0,024 Gm16325       | ENSMUSG000000094733          | 3,387                  | 0,000 Gm5416        |
| ENSMUSG000000048752        | 3,132                 | 0,023 Prss50        | ENSMUSG000000079014          | 3,350                  | 0,000 Serpina3i     |
| ENSMUSG000000045534        | 3,055                 | 0,000 Kcna5         | ENSMUSG000000050014          | 3,319                  | 0,000 Apol10b       |
| ENSMUSG0000000078921       | 3,025                 | 0,000 Tgtp2         | ENSMUSG000000066363          | 3,293                  | 0,000 Serpina3f     |
| ENSMUSG000000035896        | 2,987                 | 0,003 Rnase1        | ENSMUSG000000079363          | 3,291                  | 0,000 Gbp4          |
| ENSMUSG000000020407        | 2,895                 | 0,000 Upp1          | ENSMUSG000000060183          | 3,139                  | 0,000 Cxcl11        |
| ENSMUSG000000029379        | 2,893                 | 0,002 Cxcl3         | ENSMUSG000000105096          | 3,114                  | 0,000 Gbp10         |
| ENSMUSG000000060183        | 2,849                 | 0,000 Cxcl11        | ENSMUSG000000047222          | 3,114                  | 0,020 Rnase2a       |
| ENSMUSG000000094733        | 2,821                 | 0,000 Gm5416        | ENSMUSG000000026073          | 3,075                  | 0,000 Il1r2         |
| ENSMUSG000000066687        | 2,814                 | 0,000 Zbtb16        | ENSMUSG000000066687          | 3,069                  | 0,000 Zbtb16        |
| ENSMUSG0000000020183       | 2,795                 | 0,000 Cpm           | ENSMUSG000000068227          | 3,060                  | 0,000 Il2rb         |
| ENSMUSG000000032311        | 2,729                 | 0,000 Nrg4          | ENSMUSG000000029417          | 3,023                  | 0,000 Cxcl9         |
| ENSMUSG000000070407        | 2,713                 | 0,000 Hs3st3b1      | ENSMUSG000000101304          | 2,965                  | 0,000 Plet1os       |
| ENSMUSG0000000066170       | 2,660                 | 0,000 E230001N04Rik | ENSMUSG000000032311          | 2,957                  | 0,000 Nrg4          |
| ENSMUSG000000047798        | 2,651                 | 0,000 Cd300lf       | ENSMUSG000000097848          | 2,929                  | 0,000 Gm807         |
| ENSMUSG000000033863        | 2,629                 | 0,000 Klif9         | ENSMUSG000000095620          | 2,912                  | 0,002 2010005H15Rik |
| ENSMUSG000000027962        | 2,579                 | 0,000 Vcam1         | ENSMUSG000000064147          | 2,893                  | 0,000 Rab44         |
| ENSMUSG000000020027        | 2,538                 | 0,000 Socs2         | ENSMUSG000000020183          | 2,787                  | 0,000 Cpm           |
| ENSMUSG000000027670        | 2,520                 | 0,000 Ocstap        | ENSMUSG000000078783          | 2,750                  | 0,000 Gm9733        |
| ENSMUSG000000024222        | 2,500                 | 0,000 Fkbp5         | ENSMUSG000000066170          | 2,729                  | 0,000 E230001N04Rik |



|                      |       |       |               |                      |       |       |          |
|----------------------|-------|-------|---------------|----------------------|-------|-------|----------|
| ENSMUSG00000084956   | 2,478 | 0,000 | Gm16194       | ENSMUSG00000020407   | 2,726 | 0,000 | Upp1     |
| ENSMUSG000000022479  | 2,466 | 0,000 | Vdr           | ENSMUSG000000033863  | 2,707 | 0,000 | Klf9     |
| ENSMUSG000000031779  | 2,462 | 0,001 | Ccl22         | ENSMUSG000000025739  | 2,622 | 0,027 | Gng13    |
| ENSMUSG000000022651  | 2,451 | 0,000 | Retnlg        | ENSMUSG000000027962  | 2,621 | 0,000 | Vcam1    |
| ENSMUSG000000064147  | 2,441 | 0,000 | Rab44         | ENSMUSG000000039196  | 2,613 | 0,001 | Orm1     |
| ENSMUSG000000002847  | 2,439 | 0,000 | Pla1a         | ENSMUSG000000062488  | 2,598 | 0,000 | Ifit3b   |
| ENSMUSG000000027360  | 2,424 | 0,000 | Hdc           | ENSMUSG000000035896  | 2,597 | 0,017 | Rnase1   |
| ENSMUSG000000031762  | 2,410 | 0,000 | Mt2           | ENSMUSG000000029378  | 2,564 | 0,001 | Areg     |
| ENSMUSG0000000026770 | 2,389 | 0,003 | Il2ra         | ENSMUSG000000064032  | 2,532 | 0,015 | Gm10143  |
| ENSMUSG000000030144  | 2,365 | 0,000 | Clec4d        | ENSMUSG000000026581  | 2,527 | 0,000 | Sell     |
| ENSMUSG000000078763  | 2,363 | 0,000 | Slfn1         | ENSMUSG000000045534  | 2,513 | 0,000 | Kcna5    |
| ENSMUSG000000102189  | 2,362 | 0,006 | Gm37194       | ENSMUSG000000034271  | 2,476 | 0,000 | Jdp2     |
| ENSMUSG000000053007  | 2,360 | 0,000 | Creb5         | ENSMUSG000000078817  | 2,471 | 0,000 | Nlrp12   |
| ENSMUSG000000034271  | 2,359 | 0,000 | Jdp2          | ENSMUSG000000047976  | 2,429 | 0,048 | Kcna1    |
| ENSMUSG000000031778  | 2,331 | 0,000 | Cx3cl1        | ENSMUSG000000099137  | 2,415 | 0,000 | Gm10603  |
| ENSMUSG000000009248  | 2,302 | 0,000 | Ascl2         | ENSMUSG000000038067  | 2,409 | 0,041 | Csf3     |
| ENSMUSG000000105096  | 2,295 | 0,000 | Gbp10         | ENSMUSG000000002847  | 2,409 | 0,000 | Pla1a    |
| ENSMUSG000000095620  | 2,261 | 0,017 | 2010005H15Rik | ENSMUSG000000026770  | 2,406 | 0,016 | Il2ra    |
| ENSMUSG000000096278  | 2,234 | 0,010 | Dcpp2         | ENSMUSG000000022651  | 2,385 | 0,000 | Retnlg   |
| ENSMUSG000000039956  | 2,221 | 0,000 | Mrap          | ENSMUSG000000007480  | 2,384 | 0,018 | Mc5r     |
| ENSMUSG000000005824  | 2,209 | 0,000 | Tnfsf14       | ENSMUSG000000022602  | 2,367 | 0,000 | Arc      |
| ENSMUSG000000050578  | 2,208 | 0,002 | Mmp13         | ENSMUSG000000052403  | 2,353 | 0,016 | Fcnaos   |
| ENSMUSG000000035352  | 2,208 | 0,000 | Ccl12         | ENSMUSG000000034459  | 2,352 | 0,000 | Ifit1    |
| ENSMUSG000000097472  | 2,197 | 0,010 | Gm26586       | ENSMUSG000000078630  | 2,338 | 0,016 | Tomt     |
| ENSMUSG000000020940  | 2,188 | 0,013 | 1700023F06Rik | ENSMUSG000000032327  | 2,310 | 0,000 | Stra6    |
| ENSMUSG000000058626  | 2,180 | 0,021 | Capn11        | ENSMUSG000000033368  | 2,304 | 0,000 | Trim69   |
| ENSMUSG0000000029417 | 2,180 | 0,001 | Cxcl9         | ENSMUSG000000097141  | 2,302 | 0,036 | Gm10524  |
| ENSMUSG000000029378  | 2,172 | 0,001 | Areg          | ENSMUSG000000082292  | 2,299 | 0,000 | Gm12250  |
| ENSMUSG000000079363  | 2,165 | 0,000 | Gbp4          | ENSMUSG000000004328  | 2,294 | 0,000 | Hif3a    |
| ENSMUSG0000000032094 | 2,157 | 0,000 | Cd3d          | ENSMUSG0000000096719 | 2,264 | 0,031 | Mrgpra2b |
| ENSMUSG000000004328  | 2,156 | 0,000 | Hif3a         | ENSMUSG000000052270  | 2,247 | 0,000 | Fpr2     |
| ENSMUSG000000028270  | 2,124 | 0,000 | Gbp2          | ENSMUSG000000084956  | 2,234 | 0,002 | Gm16194  |
| ENSMUSG000000022584  | 2,122 | 0,000 | Ly6c2         | ENSMUSG000000032094  | 2,224 | 0,000 | Cd3d     |
| ENSMUSG0000000086742 | 2,119 | 0,000 | Gm16201       | ENSMUSG000000024222  | 2,203 | 0,000 | Fkbp5    |
| ENSMUSG000000022102  | 2,117 | 0,000 | Dok2          | ENSMUSG000000028270  | 2,198 | 0,000 | Gbp2     |
| ENSMUSG000000097141  | 2,111 | 0,022 | Gm10524       | ENSMUSG000000039956  | 2,197 | 0,000 | Mrap     |
| ENSMUSG0000000092680 | 2,106 | 0,000 | Snord55       | ENSMUSG000000076498  | 2,179 | 0,005 | Trbc2    |
| ENSMUSG000000028862  | 2,095 | 0,000 | Map3k6        | ENSMUSG000000028862  | 2,175 | 0,000 | Map3k6   |
| ENSMUSG000000022602  | 2,095 | 0,000 | Arc           | ENSMUSG000000025216  | 2,157 | 0,000 | Lbx1     |
| ENSMUSG000000020108  | 2,089 | 0,000 | Ddit4         | ENSMUSG000000080413  | 2,157 | 0,000 | Gm26473  |
| ENSMUSG000000076258  | 2,076 | 0,003 | Gm23935       | ENSMUSG000000025746  | 2,153 | 0,000 | Il6      |
| ENSMUSG000000026581  | 2,052 | 0,000 | Sell          | ENSMUSG000000086825  | 2,139 | 0,005 | Gm15675  |
| ENSMUSG000000041046  | 2,048 | 0,000 | Ramp3         | ENSMUSG000000032661  | 2,133 | 0,000 | Oas3     |
| ENSMUSG0000000026580 | 2,039 | 0,017 | Selp          | ENSMUSG000000035042  | 2,126 | 0,000 | Ccl5     |
| ENSMUSG000000022126  | 2,031 | 0,001 | Acod1         | ENSMUSG000000058626  | 2,117 | 0,041 | Capn11   |
| ENSMUSG000000032724  | 2,022 | 0,000 | Abtb2         | ENSMUSG000000050830  | 2,116 | 0,007 | Vwc2     |
| ENSMUSG000000025216  | 2,017 | 0,000 | Lbx1          | ENSMUSG000000027360  | 2,103 | 0,000 | Hdc      |

|                     |       |                     |                     |       |                     |
|---------------------|-------|---------------------|---------------------|-------|---------------------|
| ENSMUSG00000078817  | 2,015 | 0,000 Nlrp12        | ENSMUSG00000021123  | 2,097 | 0,000 Rdh12         |
| ENSMUSG00000038357  | 2,014 | 0,004 Camp          | ENSMUSG00000070407  | 2,096 | 0,000 Hs3st3b1      |
| ENSMUSG00000110588  | 2,012 | 0,003 Gm45774       | ENSMUSG00000092572  | 2,082 | 0,000 Serpinb10     |
| ENSMUSG00000039405  | 1,994 | 0,000 Prss23        | ENSMUSG00000106609  | 2,079 | 0,001 Gm43181       |
| ENSMUSG00000070691  | 1,992 | 0,000 Runx3         | ENSMUSG00000078763  | 2,079 | 0,000 Sifn1         |
| ENSMUSG00000092920  | 1,990 | 0,002 Mirt2         | ENSMUSG00000061048  | 2,078 | 0,031 Cdh3          |
| ENSMUSG00000024424  | 1,989 | 0,000 Ttc39c        | ENSMUSG00000040264  | 2,069 | 0,000 Gbp2b         |
| ENSMUSG00000038793  | 1,970 | 0,002 Lefty1        | ENSMUSG00000044103  | 2,067 | 0,001 Il1f9         |
| ENSMUSG00000022582  | 1,958 | 0,000 Ly6g          | ENSMUSG00000022534  | 2,065 | 0,001 Mefv          |
| ENSMUSG00000031444  | 1,946 | 0,000 F10           | ENSMUSG00000053007  | 2,055 | 0,000 Creb5         |
| ENSMUSG00000047293  | 1,940 | 0,005 Gpr15         | ENSMUSG00000100625  | 2,051 | 0,004 1700016G22Rik |
| ENSMUSG00000023132  | 1,922 | 0,008 Gzma          | ENSMUSG00000022586  | 2,049 | 0,007 Ly6i          |
| ENSMUSG00000097165  | 1,917 | 0,003 2210008F06Rik | ENSMUSG00000022479  | 2,044 | 0,000 Vdr           |
| ENSMUSG00000100113  | 1,917 | 0,018 Gm28592       | ENSMUSG00000007107  | 2,043 | 0,022 Atp1a4        |
| ENSMUSG00000025473  | 1,909 | 0,000 Adam8         | ENSMUSG00000079362  | 2,041 | 0,000 Gm43302       |
| ENSMUSG000000027978 | 1,907 | 0,000 Prss12        | ENSMUSG00000020108  | 2,036 | 0,000 Ddit4         |
| ENSMUSG00000032578  | 1,902 | 0,000 Cish          | ENSMUSG00000039405  | 2,015 | 0,000 Prss23        |
| ENSMUSG00000021123  | 1,901 | 0,000 Rdh12         | ENSMUSG00000097714  | 2,011 | 0,001 Gm20109       |
| ENSMUSG00000086815  | 1,901 | 0,019 3110082J24Rik | ENSMUSG00000097472  | 2,007 | 0,038 Gm26586       |
| ENSMUSG00000022902  | 1,895 | 0,023 Stfa2         | ENSMUSG00000054203  | 2,006 | 0,001 Ifi205        |
| ENSMUSG00000040121  | 1,893 | 0,035 Rep15         | ENSMUSG00000110588  | 2,004 | 0,010 Gm45774       |
| ENSMUSG00000082292  | 1,884 | 0,000 Gm12250       | ENSMUSG00000021750  | 2,002 | 0,000 Fam107a       |
| ENSMUSG000000079597 | 1,876 | 0,010 Gm5483        | ENSMUSG000000109560 | 1,997 | 0,010 Gm8463        |
| ENSMUSG00000020826  | 1,867 | 0,000 Nos2          | ENSMUSG00000024424  | 1,987 | 0,000 Ttc39c        |
| ENSMUSG00000113701  | 1,867 | 0,015 B230303A05Rik | ENSMUSG00000102051  | 1,983 | 0,000 I830127L07Rik |
| ENSMUSG00000058624  | 1,866 | 0,000 Gda           | ENSMUSG00000063767  | 1,968 | 0,046 S100a7a       |
| ENSMUSG00000052188  | 1,864 | 0,001 Gm14964       | ENSMUSG00000027978  | 1,964 | 0,000 Prss12        |
| ENSMUSG00000074052  | 1,861 | 0,049 BC048644      | ENSMUSG00000047798  | 1,963 | 0,000 Cd300lf       |
| ENSMUSG00000038201  | 1,856 | 0,000 Kcna7         | ENSMUSG00000105504  | 1,960 | 0,000 Gbp5          |
| ENSMUSG000000080413 | 1,856 | 0,001 Gm26473       | ENSMUSG00000060808  | 1,960 | 0,038 B9d1os        |
| ENSMUSG00000049130  | 1,848 | 0,000 C5ar1         | ENSMUSG00000052749  | 1,959 | 0,000 Trim30b       |
| ENSMUSG00000097714  | 1,842 | 0,002 Gm20109       | ENSMUSG00000022582  | 1,956 | 0,000 Ly6g          |
| ENSMUSG00000001227  | 1,838 | 0,000 Sema6b        | ENSMUSG00000025473  | 1,952 | 0,000 Adam8         |
| ENSMUSG00000050370  | 1,837 | 0,024 Ch25h         | ENSMUSG00000062157  | 1,940 | 0,001 Ifnlr1        |
| ENSMUSG00000096719  | 1,835 | 0,032 Mrgpra2b      | ENSMUSG00000058624  | 1,936 | 0,000 Gda           |
| ENSMUSG00000068227  | 1,832 | 0,001 Il2rb         | ENSMUSG00000021903  | 1,935 | 0,000 Galnt15       |
| ENSMUSG000000103164 | 1,829 | 0,001 Gm38150       | ENSMUSG00000022102  | 1,922 | 0,000 Dok2          |
| ENSMUSG00000095562  | 1,822 | 0,026 Gm21887       | ENSMUSG00000035352  | 1,920 | 0,000 Ccl12         |
| ENSMUSG00000020310  | 1,810 | 0,000 Madcam1       | ENSMUSG00000031778  | 1,914 | 0,000 Cx3cl1        |
| ENSMUSG00000032484  | 1,796 | 0,008 Ngp           | ENSMUSG00000021125  | 1,914 | 0,000 Arg2          |
| ENSMUSG00000051397  | 1,795 | 0,005 Tacstd2       | ENSMUSG00000100113  | 1,904 | 0,038 Gm28592       |
| ENSMUSG00000026822  | 1,793 | 0,023 Lcn2          | ENSMUSG00000005800  | 1,898 | 0,000 Mmp8          |
| ENSMUSG00000053214  | 1,773 | 0,008 Gm9899        | ENSMUSG00000026399  | 1,884 | 0,000 Cd55          |
| ENSMUSG000000086481 | 1,773 | 0,044 Gm11707       | ENSMUSG00000104713  | 1,884 | 0,000 Gbp6          |
| ENSMUSG00000040711  | 1,768 | 0,000 Sh3pxd2b      | ENSMUSG00000074896  | 1,883 | 0,000 Ifit3         |
| ENSMUSG00000054342  | 1,768 | 0,000 Kcnn4         | ENSMUSG00000032446  | 1,860 | 0,047 Eomes         |
| ENSMUSG00000065145  | 1,758 | 0,028 Vaultrc5      | ENSMUSG00000041046  | 1,852 | 0,000 Ramp3         |

|                     |       |                     |                     |       |                     |
|---------------------|-------|---------------------|---------------------|-------|---------------------|
| ENSMUSG00000032204  | 1,753 | 0,000 Aqp9          | ENSMUSG00000034997  | 1,850 | 0,043 Htr2a         |
| ENSMUSG00000048572  | 1,751 | 0,000 Tmem252       | ENSMUSG00000023206  | 1,847 | 0,000 Il15ra        |
| ENSMUSG000000106609 | 1,751 | 0,000 Gm43181       | ENSMUSG00000030144  | 1,843 | 0,002 Clec4d        |
| ENSMUSG00000025746  | 1,741 | 0,000 Il6           | ENSMUSG00000045094  | 1,841 | 0,004 Arhgef37      |
| ENSMUSG00000023206  | 1,734 | 0,000 Il15ra        | ENSMUSG00000022126  | 1,831 | 0,008 Acod1         |
| ENSMUSG00000032860  | 1,722 | 0,000 P2ry2         | ENSMUSG00000053101  | 1,824 | 0,000 Gpr141        |
| ENSMUSG00000038917  | 1,721 | 0,000 3930402G23Rik | ENSMUSG00000046159  | 1,821 | 0,005 Chrm3         |
| ENSMUSG000000102051 | 1,721 | 0,001 I830127L07Rik | ENSMUSG00000051748  | 1,821 | 0,004 Wfdc21        |
| ENSMUSG000000001131 | 1,717 | 0,000 Timp1         | ENSMUSG00000030142  | 1,813 | 0,001 Clec4e        |
| ENSMUSG000000099137 | 1,716 | 0,012 Gm10603       | ENSMUSG00000032420  | 1,808 | 0,000 Nt5e          |
| ENSMUSG00000021125  | 1,713 | 0,000 Arg2          | ENSMUSG00000043873  | 1,806 | 0,003 Chil5         |
| ENSMUSG00000053338  | 1,710 | 0,006 Tarm1         | ENSMUSG00000032204  | 1,787 | 0,000 Aqp9          |
| ENSMUSG00000030069  | 1,705 | 0,002 Prok2         | ENSMUSG00000076309  | 1,786 | 0,032 Mir147        |
| ENSMUSG00000029372  | 1,702 | 0,003 Ppbp          | ENSMUSG00000079339  | 1,780 | 0,006 Ifit1bl1      |
| ENSMUSG00000007107  | 1,696 | 0,033 Atp1a4        | ENSMUSG00000037681  | 1,778 | 0,045 Esyt3         |
| ENSMUSG00000025573  | 1,690 | 0,000 6030468B19Rik | ENSMUSG000000108985 | 1,773 | 0,005 A930030B08Rik |
| ENSMUSG00000044103  | 1,690 | 0,004 Il1f9         | ENSMUSG00000064380  | 1,768 | 0,022 Gm26448       |
| ENSMUSG00000076498  | 1,689 | 0,012 Trbc2         | ENSMUSG00000020027  | 1,768 | 0,000 Socs2         |
| ENSMUSG00000062515  | 1,680 | 0,000 Fabp4         | ENSMUSG00000059657  | 1,767 | 0,001 Stfa2l1       |
| ENSMUSG000000102037 | 1,678 | 0,000 Bcl2a1a       | ENSMUSG00000036863  | 1,762 | 0,003 Syde2         |
| ENSMUSG00000063767  | 1,676 | 0,037 S100a7a       | ENSMUSG00000027670  | 1,760 | 0,000 Ocstamp       |
| ENSMUSG00000022094  | 1,674 | 0,000 Slc39a14      | ENSMUSG00000053338  | 1,758 | 0,011 Tarm1         |
| ENSMUSG000000090877 | 1,671 | 0,039 Hspa1b        | ENSMUSG00000096929  | 1,743 | 0,036 A330023F24Rik |
| ENSMUSG00000030878  | 1,669 | 0,000 Cdr2          | ENSMUSG00000024730  | 1,742 | 0,048 Ms4a8a        |
| ENSMUSG00000018500  | 1,663 | 0,000 Adora2b       | ENSMUSG00000032724  | 1,741 | 0,000 Abtb2         |
| ENSMUSG00000054203  | 1,658 | 0,006 Ifi205        | ENSMUSG00000026220  | 1,735 | 0,005 Slc16a14      |
| ENSMUSG000000031104 | 1,649 | 0,000 Rab33a        | ENSMUSG00000032105  | 1,729 | 0,001 Pdzd3         |
| ENSMUSG00000028019  | 1,643 | 0,000 Pdgfc         | ENSMUSG00000048572  | 1,722 | 0,001 Tmem252       |
| ENSMUSG00000052270  | 1,641 | 0,000 Fpr2          | ENSMUSG00000028037  | 1,720 | 0,000 Ifi44         |
| ENSMUSG000000030325 | 1,640 | 0,007 Klrb1c        | ENSMUSG00000031444  | 1,719 | 0,000 F10           |
| ENSMUSG00000042265  | 1,633 | 0,000 Trem1         | ENSMUSG00000070691  | 1,713 | 0,007 Runx3         |
| ENSMUSG00000076309  | 1,625 | 0,021 Mir147        | ENSMUSG00000030069  | 1,713 | 0,004 Prok2         |
| ENSMUSG00000027068  | 1,620 | 0,005 Dhrs9         | ENSMUSG00000090877  | 1,700 | 0,049 Hspa1b        |
| ENSMUSG00000024772  | 1,609 | 0,000 Ehd1          | ENSMUSG000000103164 | 1,699 | 0,007 Gm38150       |
| ENSMUSG00000009633  | 1,605 | 0,000 G0s2          | ENSMUSG000000105813 | 1,698 | 0,043 Gm42928       |
| ENSMUSG00000092572  | 1,598 | 0,000 Serpinb10     | ENSMUSG00000079597  | 1,696 | 0,030 Gm5483        |
| ENSMUSG000000025044 | 1,595 | 0,000 Msr1          | ENSMUSG00000040711  | 1,687 | 0,000 Sh3pxd2b      |
| ENSMUSG000000078161 | 1,594 | 0,000 Erich3        | ENSMUSG00000000386  | 1,676 | 0,043 Mx1           |
| ENSMUSG00000058603  | 1,593 | 0,000 Rpl28-ps1     | ENSMUSG00000052188  | 1,674 | 0,006 Gm14964       |
| ENSMUSG000000001493 | 1,589 | 0,001 Meox1         | ENSMUSG000000081965 | 1,673 | 0,021 Gm11620       |
| ENSMUSG000000001025 | 1,585 | 0,000 S100a6        | ENSMUSG00000070304  | 1,659 | 0,000 Scn2b         |
| ENSMUSG00000046159  | 1,581 | 0,006 Chrm3         | ENSMUSG00000022094  | 1,653 | 0,000 Slc39a14      |
| ENSMUSG00000068262  | 1,577 | 0,032 Gm5879        | ENSMUSG00000009185  | 1,653 | 0,021 Ccl8          |
| ENSMUSG000000074361 | 1,573 | 0,000 C5ar2         | ENSMUSG00000015970  | 1,651 | 0,050 Chdh          |
| ENSMUSG00000079362  | 1,573 | 0,000 Gm43302       | ENSMUSG000000100147 | 1,647 | 0,035 1700047M11Rik |
| ENSMUSG00000005864  | 1,569 | 0,020 Cnga2         | ENSMUSG00000021614  | 1,638 | 0,000 Vcan          |
| ENSMUSG00000021903  | 1,566 | 0,002 Galnt15       | ENSMUSG00000020638  | 1,634 | 0,000 Cmpk2         |

|                     |       |                     |                    |       |                     |
|---------------------|-------|---------------------|--------------------|-------|---------------------|
| ENSMUSG00000032496  | 1,566 | 0,036 Ltf           | ENSMUSG00000076258 | 1,632 | 0,037 Gm23935       |
| ENSMUSG00000078783  | 1,565 | 0,001 Gm9733        | ENSMUSG00000027338 | 1,631 | 0,000 Prnd          |
| ENSMUSG00000051314  | 1,558 | 0,016 Ffar2         | ENSMUSG00000000791 | 1,628 | 0,000 Il12rb1       |
| ENSMUSG00000050896  | 1,555 | 0,041 Rtn4rl2       | ENSMUSG00000041827 | 1,626 | 0,000 Oasl1         |
| ENSMUSG00000031722  | 1,551 | 0,000 Hp            | ENSMUSG00000038357 | 1,626 | 0,036 Camp          |
| ENSMUSG00000026874  | 1,550 | 0,019 Hc            | ENSMUSG00000022512 | 1,624 | 0,011 Cldn1         |
| ENSMUSG00000100147  | 1,549 | 0,019 1700047M11Rik | ENSMUSG00000030218 | 1,620 | 0,000 Mgp           |
| ENSMUSG00000114608  | 1,547 | 0,003 AC238811.2    | ENSMUSG00000063820 | 1,617 | 0,004 Arl9          |
| ENSMUSG000000060962 | 1,544 | 0,001 Dmkn          | ENSMUSG00000056966 | 1,614 | 0,007 Gjc3          |
| ENSMUSG00000043165  | 1,535 | 0,005 Lor           | ENSMUSG00000020826 | 1,603 | 0,000 Nos2          |
| ENSMUSG00000034226  | 1,532 | 0,000 Rhov          | ENSMUSG00000046908 | 1,597 | 0,000 Ltb4r1        |
| ENSMUSG00000060019  | 1,531 | 0,000 Gm10073       | ENSMUSG00000038793 | 1,594 | 0,022 Lefty1        |
| ENSMUSG00000026981  | 1,530 | 0,000 Il1rn         | ENSMUSG00000055866 | 1,593 | 0,000 Per2          |
| ENSMUSG00000032327  | 1,517 | 0,000 Stra6         | ENSMUSG00000018500 | 1,591 | 0,000 Adora2b       |
| ENSMUSG00000029321  | 1,505 | 0,002 Slc10a6       | ENSMUSG00000051054 | 1,582 | 0,022 1700014D04Rik |
| ENSMUSG000000021750 | 1,501 | 0,000 Fam107a       | ENSMUSG00000028019 | 1,582 | 0,000 Pdgfc         |
| ENSMUSG00000060131  | 1,496 | 0,000 Atp8b4        | ENSMUSG00000022584 | 1,580 | 0,011 Ly6c2         |
| ENSMUSG00000029314  | 1,494 | 0,000 Gpat3         | ENSMUSG00000027219 | 1,577 | 0,007 Slc28a2       |
| ENSMUSG00000047986  | 1,492 | 0,021 Palm3         | ENSMUSG00000043448 | 1,571 | 0,000 Gjc2          |
| ENSMUSG00000059657  | 1,489 | 0,007 Stfa211       | ENSMUSG00000053461 | 1,571 | 0,004 Hhip2         |
| ENSMUSG00000050014  | 1,488 | 0,022 Apol10b       | ENSMUSG00000053541 | 1,569 | 0,013 Gm4759        |
| ENSMUSG00000021091  | 1,483 | 0,002 Serpina3n     | ENSMUSG00000027068 | 1,566 | 0,012 Dhrs9         |
| ENSMUSG000000017144 | 1,480 | 0,000 Rnd3          | ENSMUSG00000029321 | 1,563 | 0,003 Slc10a6       |
| ENSMUSG00000025355  | 1,477 | 0,000 Mmp19         | ENSMUSG00000053214 | 1,553 | 0,033 Gm9899        |
| ENSMUSG00000037872  | 1,476 | 0,044 Ackr1         | ENSMUSG00000003484 | 1,550 | 0,003 Cyp4f18       |
| ENSMUSG00000053101  | 1,476 | 0,000 Gpr141        | ENSMUSG00000013974 | 1,547 | 0,000 Mcemp1        |
| ENSMUSG00000040473  | 1,466 | 0,000 Cfpap69       | ENSMUSG00000051397 | 1,546 | 0,037 Tacstd2       |
| ENSMUSG00000045664  | 1,466 | 0,000 Cdc42ep2      | ENSMUSG00000020641 | 1,545 | 0,001 Rsad2         |
| ENSMUSG00000022952  | 1,465 | 0,000 Runx1         | ENSMUSG00000001227 | 1,544 | 0,000 Sema6b        |
| ENSMUSG000000027219 | 1,456 | 0,008 Slc28a2       | ENSMUSG00000045664 | 1,540 | 0,000 Cdc42ep2      |
| ENSMUSG00000021614  | 1,452 | 0,000 Vcan          | ENSMUSG00000030878 | 1,533 | 0,000 Cdr2          |
| ENSMUSG00000022534  | 1,450 | 0,009 Mefv          | ENSMUSG00000002831 | 1,532 | 0,048 Plin4         |
| ENSMUSG00000026068  | 1,440 | 0,000 Il18rap       | ENSMUSG00000042265 | 1,527 | 0,000 Trem1         |
| ENSMUSG000000071001 | 1,437 | 0,001 Hrct1         | ENSMUSG00000035873 | 1,526 | 0,000 Pawr          |
| ENSMUSG00000105504  | 1,436 | 0,000 Gbp5          | ENSMUSG00000033508 | 1,517 | 0,000 Asprv1        |
| ENSMUSG00000022408  | 1,433 | 0,012 Fam83f        | ENSMUSG00000038917 | 1,512 | 0,016 3930402G23Rik |
| ENSMUSG000000026220 | 1,430 | 0,017 Slc16a14      | ENSMUSG00000031722 | 1,510 | 0,000 Hp            |
| ENSMUSG00000032661  | 1,419 | 0,001 Oas3          | ENSMUSG00000050953 | 1,504 | 0,000 Gja1          |
| ENSMUSG00000037446  | 1,418 | 0,016 Tulp1         | ENSMUSG00000030107 | 1,499 | 0,000 Usp18         |
| ENSMUSG00000029307  | 1,416 | 0,007 Dmp1          | ENSMUSG00000028841 | 1,494 | 0,036 Cnksr1        |
| ENSMUSG00000047759  | 1,413 | 0,000 Hs3st3a1      | ENSMUSG00000042549 | 1,483 | 0,000 Map2k3os      |
| ENSMUSG00000030208  | 1,411 | 0,000 Emp1          | ENSMUSG00000030187 | 1,478 | 0,000 Klra2         |
| ENSMUSG00000001473  | 1,408 | 0,000 Tubb6         | ENSMUSG00000033213 | 1,475 | 0,005 AA467197      |
| ENSMUSG000000032105 | 1,407 | 0,010 Pdzd3         | ENSMUSG00000020122 | 1,470 | 0,000 Egrf          |
| ENSMUSG00000058443  | 1,405 | 0,001 Rpl10-ps3     | ENSMUSG00000032578 | 1,470 | 0,000 Cish          |
| ENSMUSG00000020077  | 1,400 | 0,000 Srgn          | ENSMUSG00000009633 | 1,469 | 0,000 G0s2          |
| ENSMUSG00000026303  | 1,397 | 0,006 Mlph          | ENSMUSG00000001131 | 1,469 | 0,002 Timp1         |



|                      |       |                  |                     |       |                     |
|----------------------|-------|------------------|---------------------|-------|---------------------|
| ENSMUSG00000026399   | 1,396 | 0,000 Cd55       | ENSMUSG00000024772  | 1,461 | 0,000 Ehd1          |
| ENSMUSG000000104713  | 1,394 | 0,000 Gbp6       | ENSMUSG00000007877  | 1,461 | 0,016 Tcap          |
| ENSMUSG000000064246  | 1,388 | 0,000 Chil1      | ENSMUSG000000055093 | 1,460 | 0,032 Gm8430        |
| ENSMUSG000000020122  | 1,387 | 0,000 Egfr       | ENSMUSG00000020427  | 1,459 | 0,000 Igfbp3        |
| ENSMUSG000000085196  | 1,383 | 0,049 Gm14963    | ENSMUSG00000007033  | 1,458 | 0,001 Hspa1l        |
| ENSMUSG000000042549  | 1,382 | 0,000 Map2k3os   | ENSMUSG000000009376 | 1,453 | 0,000 Met           |
| ENSMUSG000000051748  | 1,382 | 0,028 Wfdc21     | ENSMUSG000000108738 | 1,453 | 0,017 Gm44777       |
| ENSMUSG000000070304  | 1,376 | 0,000 Scn2b      | ENSMUSG000000067297 | 1,452 | 0,049 Ifit1bl2      |
| ENSMUSG000000025856  | 1,368 | 0,000 Pdgfa      | ENSMUSG000000001444 | 1,450 | 0,040 Tbx21         |
| ENSMUSG000000112567  | 1,365 | 0,015 Gm32899    | ENSMUSG000000030208 | 1,450 | 0,000 Emp1          |
| ENSMUSG000000068240  | 1,363 | 0,003 Gm11808    | ENSMUSG000000060131 | 1,446 | 0,001 Atp8b4        |
| ENSMUSG000000007659  | 1,358 | 0,000 Bcl2l1     | ENSMUSG000000031762 | 1,445 | 0,001 Mt2           |
| ENSMUSG0000000033213 | 1,357 | 0,004 AA467197   | ENSMUSG000000092680 | 1,436 | 0,020 Snord55       |
| ENSMUSG000000005800  | 1,356 | 0,005 Mmp8       | ENSMUSG000000035283 | 1,432 | 0,000 Adrb1         |
| ENSMUSG000000020427  | 1,355 | 0,000 Igfbp3     | ENSMUSG000000089726 | 1,426 | 0,000 Mir17hg       |
| ENSMUSG0000000001444 | 1,351 | 0,036 Tbx21      | ENSMUSG000000035692 | 1,425 | 0,000 Isg15         |
| ENSMUSG000000084159  | 1,349 | 0,010 Gm12696    | ENSMUSG000000030303 | 1,424 | 0,000 Far2          |
| ENSMUSG000000056290  | 1,348 | 0,013 Ms4a4b     | ENSMUSG000000105338 | 1,415 | 0,000 Gm43802       |
| ENSMUSG000000097558  | 1,346 | 0,014 Gm26902    | ENSMUSG000000071347 | 1,407 | 0,003 C1qtnf9       |
| ENSMUSG000000111966  | 1,345 | 0,000 Gm5781     | ENSMUSG000000044461 | 1,406 | 0,022 Shisa2        |
| ENSMUSG000000022512  | 1,343 | 0,013 Cldn1      | ENSMUSG000000088634 | 1,403 | 0,041 Gm24958       |
| ENSMUSG000000023087  | 1,330 | 0,000 Noct       | ENSMUSG000000104880 | 1,400 | 0,042 AL645522.1    |
| ENSMUSG0000000030748 | 1,328 | 0,000 Il4ra      | ENSMUSG000000078853 | 1,394 | 0,000 Igtg          |
| ENSMUSG000000079419  | 1,327 | 0,009 Ms4a6c     | ENSMUSG000000064441 | 1,388 | 0,003 Snord37       |
| ENSMUSG000000110686  | 1,312 | 0,006 Gm45855    | ENSMUSG000000027514 | 1,384 | 0,000 Zbp1          |
| ENSMUSG000000027338  | 1,311 | 0,001 Prnd       | ENSMUSG000000025573 | 1,381 | 0,006 6030468B19Rik |
| ENSMUSG000000024164  | 1,306 | 0,004 C3         | ENSMUSG000000008307 | 1,370 | 0,010 1700109H08Rik |
| ENSMUSG000000030303  | 1,298 | 0,000 Far2       | ENSMUSG000000045932 | 1,370 | 0,000 Ifit2         |
| ENSMUSG000000027849  | 1,292 | 0,039 Syt6       | ENSMUSG000000027849 | 1,366 | 0,040 Syt6          |
| ENSMUSG0000000073293 | 1,284 | 0,004 Nudt10     | ENSMUSG000000036185 | 1,361 | 0,029 Sapcd1        |
| ENSMUSG000000053111  | 1,283 | 0,025 Fank1      | ENSMUSG000000034438 | 1,360 | 0,001 Gbp8          |
| ENSMUSG000000094497  | 1,283 | 0,010 Gm8210     | ENSMUSG000000031710 | 1,350 | 0,016 Ucp1          |
| ENSMUSG000000105699  | 1,281 | 0,000 Gm43703    | ENSMUSG000000037820 | 1,346 | 0,000 Tgm2          |
| ENSMUSG0000000030187 | 1,275 | 0,000 Klra2      | ENSMUSG000000001493 | 1,345 | 0,016 Meox1         |
| ENSMUSG000000050621  | 1,274 | 0,003 Rps27rt    | ENSMUSG000000009248 | 1,345 | 0,001 Ascl2         |
| ENSMUSG000000046223  | 1,273 | 0,000 Plaur      | ENSMUSG000000029314 | 1,340 | 0,000 Gpat3         |
| ENSMUSG0000000074874 | 1,267 | 0,000 Ctla2b     | ENSMUSG000000038037 | 1,339 | 0,000 Socs1         |
| ENSMUSG000000036863  | 1,266 | 0,015 Syde2      | ENSMUSG000000064246 | 1,334 | 0,000 Chil1         |
| ENSMUSG000000055866  | 1,266 | 0,000 Per2       | ENSMUSG000000030214 | 1,334 | 0,000 Plbd1         |
| ENSMUSG000000079445  | 1,254 | 0,000 B3gnt7     | ENSMUSG000000049130 | 1,330 | 0,009 C5ar1         |
| ENSMUSG000000040264  | 1,254 | 0,001 Gbp2b      | ENSMUSG000000106258 | 1,329 | 0,031 Rpl7a-ps7     |
| ENSMUSG000000026833  | 1,253 | 0,000 Olfm1      | ENSMUSG000000001025 | 1,315 | 0,000 S100a6        |
| ENSMUSG000000115358  | 1,250 | 0,002 AC127578.1 | ENSMUSG000000031958 | 1,313 | 0,000 Ldhd          |
| ENSMUSG0000000045094 | 1,245 | 0,048 Arhgef37   | ENSMUSG000000039699 | 1,309 | 0,000 Batf2         |
| ENSMUSG000000000791  | 1,236 | 0,003 Il12rb1    | ENSMUSG000000073739 | 1,309 | 0,023 Gm16287       |
| ENSMUSG000000070348  | 1,233 | 0,000 Ccnd1      | ENSMUSG000000024066 | 1,308 | 0,005 Xdh           |
| ENSMUSG000000041959  | 1,228 | 0,000 S100a10    | ENSMUSG000000097572 | 1,304 | 0,005 Gm26797       |

|                      |       |                  |                     |       |                     |
|----------------------|-------|------------------|---------------------|-------|---------------------|
| ENSMUSG00000013974   | 1,227 | 0,002 Mcemp1     | ENSMUSG00000073489  | 1,303 | 0,000 Ifi204        |
| ENSMUSG000000035283  | 1,227 | 0,000 Adrb1      | ENSMUSG00000002204  | 1,302 | 0,000 Napsa         |
| ENSMUSG000000114432  | 1,226 | 0,001 AC160962.1 | ENSMUSG000000100465 | 1,300 | 0,002 Gm29264       |
| ENSMUSG000000000440  | 1,225 | 0,000 Pparg      | ENSMUSG000000003070 | 1,292 | 0,000 Efna2         |
| ENSMUSG000000086825  | 1,224 | 0,043 Gm15675    | ENSMUSG000000078920 | 1,291 | 0,000 Ifi47         |
| ENSMUSG000000104603  | 1,223 | 0,011 AL845457.1 | ENSMUSG000000098754 | 1,284 | 0,000 Prn           |
| ENSMUSG000000073421  | 1,223 | 0,000 H2-Ab1     | ENSMUSG000000051444 | 1,281 | 0,000 Bbs12         |
| ENSMUSG000000049892  | 1,218 | 0,002 Rasd1      | ENSMUSG000000064791 | 1,276 | 0,006 Snord14e      |
| ENSMUSG000000038037  | 1,217 | 0,000 Socs1      | ENSMUSG000000029410 | 1,271 | 0,000 Ppef2         |
| ENSMUSG000000050549  | 1,213 | 0,000 Fam241a    | ENSMUSG000000078161 | 1,269 | 0,009 Erich3        |
| ENSMUSG000000015850  | 1,209 | 0,001 Adamtsl4   | ENSMUSG000000031997 | 1,268 | 0,032 Trpc6         |
| ENSMUSG000000068105  | 1,207 | 0,001 Tnfrsf13c  | ENSMUSG000000065987 | 1,254 | 0,013 Cd209b        |
| ENSMUSG000000041608  | 1,202 | 0,032 Entpd3     | ENSMUSG000000114724 | 1,253 | 0,000 CT009713.7    |
| ENSMUSG000000081984  | 1,201 | 0,001 Dnajb3     | ENSMUSG000000040473 | 1,252 | 0,001 Cfap69        |
| ENSMUSG000000052749  | 1,200 | 0,001 Trim30b    | ENSMUSG000000030562 | 1,248 | 0,013 Nox4          |
| ENSMUSG0000000031997 | 1,198 | 0,021 Trpc6      | ENSMUSG000000025498 | 1,248 | 0,000 Irf7          |
| ENSMUSG000000026180  | 1,198 | 0,000 Cxcr2      | ENSMUSG000000066058 | 1,248 | 0,026 Cldn19        |
| ENSMUSG000000044734  | 1,194 | 0,004 Serpinb1a  | ENSMUSG000000054342 | 1,245 | 0,000 Kcnn4         |
| ENSMUSG000000026558  | 1,194 | 0,000 Uck2       | ENSMUSG000000086124 | 1,242 | 0,016 A530076117Rik |
| ENSMUSG000000040714  | 1,192 | 0,007 Klc3       | ENSMUSG000000110697 | 1,240 | 0,000 Gm31718       |
| ENSMUSG000000038059  | 1,189 | 0,000 Smim3      | ENSMUSG000000049892 | 1,238 | 0,004 Rasd1         |
| ENSMUSG000000045106  | 1,188 | 0,036 Ccdc73     | ENSMUSG000000034226 | 1,237 | 0,005 Rhov          |
| ENSMUSG000000052212  | 1,185 | 0,046 Cd177      | ENSMUSG000000017144 | 1,234 | 0,000 Rnd3          |
| ENSMUSG000000033644  | 1,181 | 0,001 Piiw12     | ENSMUSG000000033032 | 1,233 | 0,000 Afap111       |
| ENSMUSG000000016283  | 1,170 | 0,020 H2-M2      | ENSMUSG000000037428 | 1,231 | 0,004 Vgf           |
| ENSMUSG000000002204  | 1,170 | 0,000 Napsa      | ENSMUSG000000022952 | 1,224 | 0,000 Runx1         |
| ENSMUSG000000028480  | 1,164 | 0,000 Glipr2     | ENSMUSG000000040152 | 1,220 | 0,005 Thbs1         |
| ENSMUSG000000045502  | 1,164 | 0,001 Hcar2      | ENSMUSG000000062515 | 1,220 | 0,034 Fabp4         |
| ENSMUSG000000040274  | 1,159 | 0,000 Cdk6       | ENSMUSG000000097494 | 1,219 | 0,045 4933406C10Rik |
| ENSMUSG0000000028874 | 1,155 | 0,000 Fgr        | ENSMUSG000000041959 | 1,213 | 0,001 S100a10       |
| ENSMUSG000000058905  | 1,155 | 0,027 Gm10051    | ENSMUSG000000020077 | 1,205 | 0,000 Srgn          |
| ENSMUSG000000087412  | 1,154 | 0,000 Gm15501    | ENSMUSG000000025355 | 1,205 | 0,000 Mmp19         |
| ENSMUSG000000015501  | 1,152 | 0,000 Hivep2     | ENSMUSG000000005672 | 1,202 | 0,000 Kit           |
| ENSMUSG000000050953  | 1,151 | 0,000 Gja1       | ENSMUSG000000026068 | 1,201 | 0,004 Il18rap       |
| ENSMUSG000000005087  | 1,150 | 0,000 Cd44       | ENSMUSG000000030711 | 1,196 | 0,001 Sult1a1       |
| ENSMUSG000000106895  | 1,135 | 0,025 Gm4754     | ENSMUSG000000003032 | 1,195 | 0,000 Klf4          |
| ENSMUSG0000000024910 | 1,133 | 0,013 Ctsw       | ENSMUSG000000026303 | 1,194 | 0,029 Mlph          |
| ENSMUSG000000048807  | 1,126 | 0,000 Slc35e4    | ENSMUSG000000047759 | 1,191 | 0,002 Hs3st3a1      |
| ENSMUSG000000056749  | 1,121 | 0,000 Nfil3      | ENSMUSG000000074874 | 1,190 | 0,002 Ctla2b        |
| ENSMUSG000000055632  | 1,120 | 0,011 Hmcn2      | ENSMUSG000000038354 | 1,189 | 0,036 Ankrd35       |
| ENSMUSG000000076441  | 1,119 | 0,000 Ass1       | ENSMUSG000000015850 | 1,188 | 0,001 Adamtsl4      |
| ENSMUSG000000033508  | 1,119 | 0,009 Asprv1     | ENSMUSG000000109032 | 1,187 | 0,004 Gm7972        |
| ENSMUSG000000071347  | 1,116 | 0,020 C1qtnf9    | ENSMUSG000000044734 | 1,186 | 0,007 Serpinb1a     |
| ENSMUSG0000000036594 | 1,110 | 0,000 H2-Aa      | ENSMUSG000000104517 | 1,186 | 0,047 Gm18407       |
| ENSMUSG000000031700  | 1,104 | 0,000 Gpt2       | ENSMUSG000000079681 | 1,185 | 0,011 Zglp1         |
| ENSMUSG000000032643  | 1,101 | 0,000 Fhl3       | ENSMUSG000000050612 | 1,185 | 0,028 Txndc2        |
| ENSMUSG000000031958  | 1,101 | 0,002 Ldhd       | ENSMUSG000000114432 | 1,183 | 0,002 AC160962.1    |

|                     |       |                     |                     |       |                     |
|---------------------|-------|---------------------|---------------------|-------|---------------------|
| ENSMUSG00000035873  | 1,100 | 0,003 Pawr          | ENSMUSG00000024087  | 1,168 | 0,000 Cyp1b1        |
| ENSMUSG000000098754 | 1,095 | 0,001 Prn           | ENSMUSG00000069874  | 1,165 | 0,000 Irgm2         |
| ENSMUSG00000024526  | 1,095 | 0,038 Cidea         | ENSMUSG00000020836  | 1,164 | 0,000 Coro6         |
| ENSMUSG00000032470  | 1,095 | 0,000 Mras          | ENSMUSG00000000303  | 1,161 | 0,008 Cdh1          |
| ENSMUSG000000092837 | 1,095 | 0,002 Rpph1         | ENSMUSG00000022528  | 1,156 | 0,000 Hes1          |
| ENSMUSG000000037820 | 1,095 | 0,000 Tgm2          | ENSMUSG00000028268  | 1,153 | 0,000 Gbp3          |
| ENSMUSG00000062456  | 1,090 | 0,001 Rpl9-ps6      | ENSMUSG00000020310  | 1,147 | 0,040 Madcam1       |
| ENSMUSG00000039960  | 1,090 | 0,000 Rhou          | ENSMUSG00000061531  | 1,147 | 0,004 Tmem236       |
| ENSMUSG000000070780 | 1,086 | 0,000 Rbm47         | ENSMUSG00000041754  | 1,147 | 0,014 Trem3         |
| ENSMUSG000000086124 | 1,083 | 0,023 A530076l17Rik | ENSMUSG00000002108  | 1,144 | 0,000 Nr1h3         |
| ENSMUSG00000030214  | 1,082 | 0,000 Plbd1         | ENSMUSG00000024430  | 1,143 | 0,010 Cabyr         |
| ENSMUSG00000070305  | 1,080 | 0,005 Mpzl3         | ENSMUSG00000027456  | 1,135 | 0,012 Sdcbp2        |
| ENSMUSG00000051444  | 1,077 | 0,000 Bbs12         | ENSMUSG00000030170  | 1,127 | 0,002 Wnt5b         |
| ENSMUSG00000009376  | 1,075 | 0,003 Met           | ENSMUSG00000032193  | 1,127 | 0,000 Ldlr          |
| ENSMUSG00000060586  | 1,074 | 0,000 H2-Eb1        | ENSMUSG00000028480  | 1,127 | 0,000 Glipr2        |
| ENSMUSG000000031765 | 1,071 | 0,001 Mt1           | ENSMUSG00000024526  | 1,126 | 0,042 Cidea         |
| ENSMUSG00000034591  | 1,066 | 0,013 Slc41a2       | ENSMUSG00000003271  | 1,122 | 0,035 Sult2b1       |
| ENSMUSG00000011305  | 1,064 | 0,028 Plin5         | ENSMUSG00000024659  | 1,121 | 0,007 Anxa1         |
| ENSMUSG00000042608  | 1,064 | 0,000 Stk40         | ENSMUSG00000040274  | 1,121 | 0,000 Cdk6          |
| ENSMUSG000000114635 | 1,061 | 0,000 CT010498.2    | ENSMUSG00000074361  | 1,118 | 0,003 C5ar2         |
| ENSMUSG00000033032  | 1,060 | 0,000 Afap111       | ENSMUSG00000047330  | 1,116 | 0,024 Kcne4         |
| ENSMUSG00000078193  | 1,060 | 0,028 Gm2000        | ENSMUSG00000086742  | 1,115 | 0,019 Gm16201       |
| ENSMUSG000000037225 | 1,059 | 0,004 Fgf2          | ENSMUSG00000097365  | 1,112 | 0,037 C030034L19Rik |
| ENSMUSG00000070343  | 1,055 | 0,011 Gm10288       | ENSMUSG00000020419  | 1,110 | 0,047 Hormad2       |
| ENSMUSG00000073802  | 1,054 | 0,000 Cdkn2b        | ENSMUSG00000031896  | 1,110 | 0,005 Ctrl          |
| ENSMUSG00000074227  | 1,054 | 0,043 Spint2        | ENSMUSG00000027377  | 1,107 | 0,050 Mall          |
| ENSMUSG000000110697 | 1,052 | 0,001 Gm31718       | ENSMUSG00000034156  | 1,106 | 0,000 Tspoap1       |
| ENSMUSG00000061531  | 1,050 | 0,002 Tmem236       | ENSMUSG00000073293  | 1,105 | 0,018 Nudt10        |
| ENSMUSG00000060950  | 1,046 | 0,000 Trmt61a       | ENSMUSG00000092626  | 1,101 | 0,034 9130230N09Rik |
| ENSMUSG000000083337 | 1,045 | 0,010 Gm11539       | ENSMUSG00000040253  | 1,101 | 0,001 Gbp7          |
| ENSMUSG00000030413  | 1,044 | 0,011 Pglyrp1       | ENSMUSG00000000792  | 1,101 | 0,000 Slc5a5        |
| ENSMUSG00000029322  | 1,044 | 0,000 Plac8         | ENSMUSG00000009378  | 1,099 | 0,001 Slc16a12      |
| ENSMUSG00000028328  | 1,040 | 0,000 Tmod1         | ENSMUSG00000074151  | 1,099 | 0,002 Nlrc5         |
| ENSMUSG00000056888  | 1,038 | 0,000 Glipr1        | ENSMUSG00000001473  | 1,096 | 0,000 Tubb6         |
| ENSMUSG00000025591  | 1,036 | 0,000 Tma16         | ENSMUSG00000023087  | 1,095 | 0,000 Noct          |
| ENSMUSG00000078920  | 1,036 | 0,000 Ifi47         | ENSMUSG00000035295  | 1,094 | 0,002 Wdr38         |
| ENSMUSG000000069805 | 1,034 | 0,007 Fbp1          | ENSMUSG000000101462 | 1,091 | 0,026 Gm3052        |
| ENSMUSG00000032207  | 1,034 | 0,004 Lipc          | ENSMUSG00000050621  | 1,090 | 0,017 Rps27rt       |
| ENSMUSG00000046908  | 1,033 | 0,008 Ltb4r1        | ENSMUSG00000104671  | 1,090 | 0,042 Gm43062       |
| ENSMUSG00000031506  | 1,031 | 0,001 Ptpn7         | ENSMUSG00000046733  | 1,086 | 0,012 Gprc5a        |
| ENSMUSG000000081926 | 1,028 | 0,034 Gm15536       | ENSMUSG00000033967  | 1,085 | 0,000 Rnf225        |
| ENSMUSG00000027514  | 1,028 | 0,001 Zbp1          | ENSMUSG00000099876  | 1,082 | 0,046 Gm29650       |
| ENSMUSG00000057657  | 1,028 | 0,022 Rps18-ps3     | ENSMUSG00000022237  | 1,078 | 0,002 Ankrd33b      |
| ENSMUSG000000097365 | 1,027 | 0,040 C030034L19Rik | ENSMUSG00000039960  | 1,075 | 0,001 Rhou          |
| ENSMUSG00000041754  | 1,016 | 0,018 Trem3         | ENSMUSG00000029561  | 1,072 | 0,000 Oasl2         |
| ENSMUSG00000022218  | 1,013 | 0,000 Tgm1          | ENSMUSG00000022026  | 1,070 | 0,003 Olfm4         |
| ENSMUSG00000105388  | 1,009 | 0,026 Rpl36a-ps2    | ENSMUSG00000029322  | 1,063 | 0,000 Plac8         |

|                      |       |                     |                     |       |                     |
|----------------------|-------|---------------------|---------------------|-------|---------------------|
| ENSMUSG00000036305   | 1,009 | 0,031 Rpl39-ps      | ENSMUSG00000023341  | 1,062 | 0,000 Mx2           |
| ENSMUSG000000061024  | 1,007 | 0,000 Rrs1          | ENSMUSG00000019997  | 1,061 | 0,033 Ctgf          |
| ENSMUSG000000024053  | 1,003 | 0,001 Emilin2       | ENSMUSG000000034591 | 1,059 | 0,020 Slc41a2       |
| ENSMUSG000000050335  | 1,001 | 0,000 Lgals3        | ENSMUSG00000001281  | 1,056 | 0,038 Itgb7         |
| ENSMUSG000000047844  | 1,000 | 0,007 Bex4          | ENSMUSG000000061815 | 1,055 | 0,006 Rufy4         |
| ENSMUSG000000039232  | 0,999 | 0,004 Stx11         | ENSMUSG000000005087 | 1,052 | 0,001 Cd44          |
| ENSMUSG000000037434  | 0,995 | 0,000 Slc30a1       | ENSMUSG000000110419 | 1,049 | 0,037 AW046200      |
| ENSMUSG000000024732  | 0,992 | 0,000 Ccdc86        | ENSMUSG000000070305 | 1,047 | 0,010 Mpzl3         |
| ENSMUSG0000000071470 | 0,991 | 0,006 Ccnb1ip1      | ENSMUSG000000107331 | 1,046 | 0,001 Gm42732       |
| ENSMUSG000000060419  | 0,989 | 0,003 Rps16-ps2     | ENSMUSG000000074796 | 1,044 | 0,015 Slc4a11       |
| ENSMUSG000000044258  | 0,987 | 0,028 Ctla2a        | ENSMUSG000000044258 | 1,044 | 0,028 Ctla2a        |
| ENSMUSG000000028069  | 0,981 | 0,000 Gpatch4       | ENSMUSG000000090125 | 1,043 | 0,036 Pou3f1        |
| ENSMUSG000000021149  | 0,981 | 0,000 Gtbp4         | ENSMUSG000000022346 | 1,042 | 0,000 Myc           |
| ENSMUSG000000029343  | 0,979 | 0,001 Crybb1        | ENSMUSG000000022218 | 1,042 | 0,000 Tgm1          |
| ENSMUSG00000001542   | 0,978 | 0,000 Ell2          | ENSMUSG000000024910 | 1,041 | 0,040 Ctsw          |
| ENSMUSG0000000013415 | 0,978 | 0,011 Igf2bp1       | ENSMUSG000000035576 | 1,041 | 0,046 L3mbtl1       |
| ENSMUSG000000039942  | 0,976 | 0,044 Ptger4        | ENSMUSG000000040605 | 1,039 | 0,001 Bace2         |
| ENSMUSG000000078853  | 0,976 | 0,000 Igtp          | ENSMUSG000000030748 | 1,037 | 0,000 Il4ra         |
| ENSMUSG000000049999  | 0,976 | 0,000 Ppp1r3d       | ENSMUSG000000097386 | 1,032 | 0,046 9130213A22Rik |
| ENSMUSG000000038335  | 0,975 | 0,000 Tsr1          | ENSMUSG000000024935 | 1,031 | 0,037 Slc1a1        |
| ENSMUSG000000002108  | 0,974 | 0,000 Nr1h3         | ENSMUSG000000027318 | 1,030 | 0,024 Adam33        |
| ENSMUSG000000109941  | 0,971 | 0,000 Exosc6        | ENSMUSG00000013415  | 1,026 | 0,010 Igf2bp1       |
| ENSMUSG0000000031494 | 0,970 | 0,015 Cd209a        | ENSMUSG000000026558 | 1,024 | 0,000 Uck2          |
| ENSMUSG000000025492  | 0,968 | 0,000 Ifitm3        | ENSMUSG000000049103 | 1,024 | 0,002 Ccr2          |
| ENSMUSG000000052040  | 0,967 | 0,000 Klfl3         | ENSMUSG000000003469 | 1,021 | 0,021 Phyhip        |
| ENSMUSG000000024610  | 0,959 | 0,000 Cd74          | ENSMUSG000000074743 | 1,020 | 0,024 Thbd          |
| ENSMUSG000000024679  | 0,957 | 0,026 Ms4a6d        | ENSMUSG000000109602 | 1,018 | 0,004 Gm31597       |
| ENSMUSG000000035042  | 0,954 | 0,049 Ccl5          | ENSMUSG000000002897 | 1,018 | 0,000 Il17ra        |
| ENSMUSG000000070960  | 0,949 | 0,038 Gm19680       | ENSMUSG000000051065 | 1,015 | 0,004 Mb21d2        |
| ENSMUSG0000000045725 | 0,948 | 0,011 Prr15         | ENSMUSG000000103839 | 1,015 | 0,034 Gm37607       |
| ENSMUSG000000057135  | 0,945 | 0,024 Scimp         | ENSMUSG000000024843 | 1,014 | 0,000 Chka          |
| ENSMUSG000000097346  | 0,945 | 0,049 Gm26619       | ENSMUSG000000068105 | 1,014 | 0,010 Tnfrsf13c     |
| ENSMUSG000000018543  | 0,944 | 0,028 1700001P01Rik | ENSMUSG000000027580 | 1,014 | 0,000 Helz2         |
| ENSMUSG000000114884  | 0,943 | 0,023 AC168059.2    | ENSMUSG000000024899 | 1,014 | 0,003 Papss2        |
| ENSMUSG000000022951  | 0,939 | 0,000 Rcan1         | ENSMUSG000000020121 | 1,011 | 0,000 Srgap1        |
| ENSMUSG000000093677  | 0,937 | 0,001 Gm20712       | ENSMUSG000000028328 | 1,009 | 0,000 Tmod1         |
| ENSMUSG0000000060438 | 0,936 | 0,003 Rps10-ps1     | ENSMUSG000000039232 | 1,009 | 0,006 Stx11         |
| ENSMUSG000000106847  | 0,934 | 0,000 Peg13         | ENSMUSG000000032561 | 1,003 | 0,006 Acpp          |
| ENSMUSG000000020961  | 0,931 | 0,001 Ston2         | ENSMUSG000000055833 | 1,000 | 0,007 1700034H15Rik |
| ENSMUSG000000024899  | 0,929 | 0,004 Papss2        | ENSMUSG000000114884 | 0,999 | 0,036 AC168059.2    |
| ENSMUSG000000068762  | 0,926 | 0,016 Gstm6         | ENSMUSG000000030413 | 0,998 | 0,022 Pglyrp1       |
| ENSMUSG000000038521  | 0,926 | 0,050 C1s1          | ENSMUSG000000054435 | 0,994 | 0,022 Gimap4        |
| ENSMUSG000000053801  | 0,926 | 0,000 Grwd1         | ENSMUSG000000070427 | 0,989 | 0,000 Il18bp        |
| ENSMUSG0000000067288 | 0,925 | 0,005 Rps28         | ENSMUSG000000068762 | 0,987 | 0,030 Gstm6         |
| ENSMUSG000000029082  | 0,923 | 0,002 Bst1          | ENSMUSG000000024610 | 0,987 | 0,000 Cd74          |
| ENSMUSG000000096883  | 0,922 | 0,028 Shisa8        | ENSMUSG000000026180 | 0,986 | 0,000 Cxcr2         |
| ENSMUSG000000058761  | 0,920 | 0,000 Rnf169        | ENSMUSG000000045319 | 0,985 | 0,007 Proser2       |



|                     |       |                     |                    |       |                     |
|---------------------|-------|---------------------|--------------------|-------|---------------------|
| ENSMUSG00000046791  | 0,919 | 0,000 Riox1         | ENSMUSG00000026107 | 0,983 | 0,002 Nabp1         |
| ENSMUSG00000033255  | 0,919 | 0,030 Gm5134        | ENSMUSG00000114487 | 0,982 | 0,024 CT010498.1    |
| ENSMUSG00000027395  | 0,918 | 0,000 Polr1b        | ENSMUSG00000007659 | 0,982 | 0,000 Bcl2l1        |
| ENSMUSG00000043421  | 0,916 | 0,000 Hlfpda        | ENSMUSG00000015501 | 0,976 | 0,001 Hivep2        |
| ENSMUSG00000022305  | 0,916 | 0,000 Lrp12         | ENSMUSG00000075602 | 0,975 | 0,013 Ly6a          |
| ENSMUSG00000074796  | 0,914 | 0,016 Slc4a11       | ENSMUSG00000050549 | 0,970 | 0,000 Fam241a       |
| ENSMUSG00000022237  | 0,911 | 0,005 Ankrd33b      | ENSMUSG00000060568 | 0,969 | 0,014 Fam78b        |
| ENSMUSG00000053175  | 0,910 | 0,027 Bcl3          | ENSMUSG00000029082 | 0,968 | 0,002 Bst1          |
| ENSMUSG000000040152 | 0,905 | 0,040 Thbs1         | ENSMUSG00000020205 | 0,967 | 0,000 Phlda1        |
| ENSMUSG00000079547  | 0,905 | 0,042 H2-DMb1       | ENSMUSG00000054404 | 0,967 | 0,005 Slfn5         |
| ENSMUSG00000093327  | 0,903 | 0,000 Mir5107       | ENSMUSG00000056501 | 0,964 | 0,004 Cebpb         |
| ENSMUSG00000036381  | 0,900 | 0,002 P2ry14        | ENSMUSG00000039236 | 0,961 | 0,003 Isg20         |
| ENSMUSG00000073775  | 0,900 | 0,000 Kti12         | ENSMUSG00000070348 | 0,957 | 0,000 Ccnd1         |
| ENSMUSG00000030711  | 0,899 | 0,016 Sult1a1       | ENSMUSG00000029605 | 0,955 | 0,005 Oas1b         |
| ENSMUSG00000020798  | 0,897 | 0,000 Spns3         | ENSMUSG00000022504 | 0,955 | 0,026 Ciita         |
| ENSMUSG000000102737 | 0,897 | 0,009 1700016A09Rik | ENSMUSG00000098850 | 0,954 | 0,003 Gm27390       |
| ENSMUSG00000044576  | 0,895 | 0,000 Gareme2       | ENSMUSG00000022951 | 0,954 | 0,000 Rcan1         |
| ENSMUSG00000051065  | 0,895 | 0,009 Mb21d2        | ENSMUSG00000032860 | 0,950 | 0,008 P2ry2         |
| ENSMUSG000000105338 | 0,893 | 0,021 Gm43802       | ENSMUSG00000000440 | 0,949 | 0,000 Pparg         |
| ENSMUSG00000040605  | 0,893 | 0,002 Bace2         | ENSMUSG00000001588 | 0,943 | 0,015 Acap1         |
| ENSMUSG00000022018  | 0,892 | 0,007 Rgcc          | ENSMUSG00000032470 | 0,939 | 0,000 Mras          |
| ENSMUSG00000027907  | 0,891 | 0,003 S100a11       | ENSMUSG00000018543 | 0,936 | 0,021 1700001P01Rik |
| ENSMUSG00000022346  | 0,891 | 0,000 Myc           | ENSMUSG00000061024 | 0,936 | 0,000 Rrs1          |
| ENSMUSG00000001707  | 0,890 | 0,000 Eef1e1        | ENSMUSG00000025492 | 0,935 | 0,000 Ifitm3        |
| ENSMUSG00000071637  | 0,890 | 0,001 Cebpdl        | ENSMUSG00000036594 | 0,933 | 0,001 H2-Aa         |
| ENSMUSG00000020224  | 0,889 | 0,002 Llph          | ENSMUSG00000036390 | 0,933 | 0,000 Gadd45a       |
| ENSMUSG00000002897  | 0,888 | 0,000 Il17ra        | ENSMUSG00000115426 | 0,930 | 0,034 AC129931.1    |
| ENSMUSG00000095687  | 0,886 | 0,030 Rnaset2a      | ENSMUSG00000039629 | 0,929 | 0,014 Strip2        |
| ENSMUSG00000032656  | 0,886 | 0,016 March3        | ENSMUSG00000022146 | 0,924 | 0,011 Osmr          |
| ENSMUSG000000110010 | 0,884 | 0,006 Gm45629       | ENSMUSG00000020044 | 0,924 | 0,002 Timp3         |
| ENSMUSG00000037904  | 0,883 | 0,000 Ankrd9        | ENSMUSG00000005148 | 0,924 | 0,005 Klf5          |
| ENSMUSG00000098430  | 0,882 | 0,023 Gm27494       | ENSMUSG00000032643 | 0,923 | 0,000 Fhl3          |
| ENSMUSG00000008734  | 0,882 | 0,000 Gprc5b        | ENSMUSG00000102037 | 0,922 | 0,036 Bcl2a1a       |
| ENSMUSG00000022026  | 0,882 | 0,014 Olfm4         | ENSMUSG00000058761 | 0,922 | 0,000 Rnf169        |
| ENSMUSG00000047657  | 0,879 | 0,047 Crry-ps       | ENSMUSG00000060470 | 0,920 | 0,015 Adgrg3        |
| ENSMUSG00000032014  | 0,877 | 0,000 Oaf           | ENSMUSG00000026020 | 0,920 | 0,000 Nop58         |
| ENSMUSG000000045179 | 0,875 | 0,025 Sox3          | ENSMUSG00000089774 | 0,917 | 0,000 Slc5a3        |
| ENSMUSG00000022504  | 0,875 | 0,019 Ciita         | ENSMUSG00000097467 | 0,914 | 0,017 Gm26737       |
| ENSMUSG00000034203  | 0,874 | 0,000 Chchd4        | ENSMUSG00000001542 | 0,909 | 0,002 Eil2          |
| ENSMUSG00000057561  | 0,874 | 0,000 Eif1a         | ENSMUSG00000114025 | 0,909 | 0,032 AC154636.3    |
| ENSMUSG00000022528  | 0,873 | 0,000 Hes1          | ENSMUSG00000059493 | 0,907 | 0,048 Nhs           |
| ENSMUSG00000045709  | 0,872 | 0,007 Smkr-ps       | ENSMUSG00000053414 | 0,906 | 0,007 Hunk          |
| ENSMUSG00000056737  | 0,871 | 0,002 Capg          | ENSMUSG00000039116 | 0,904 | 0,019 Adgrg6        |
| ENSMUSG000000060143 | 0,870 | 0,008 Gm10076       | ENSMUSG00000020363 | 0,901 | 0,035 Gfpt2         |
| ENSMUSG00000038888  | 0,870 | 0,000 Ctu1          | ENSMUSG00000024486 | 0,901 | 0,000 Hbegf         |
| ENSMUSG00000028771  | 0,869 | 0,000 Ptpn12        | ENSMUSG00000021203 | 0,900 | 0,000 Otub2         |
| ENSMUSG00000026020  | 0,863 | 0,000 Nop58         | ENSMUSG00000027868 | 0,899 | 0,021 Tbx15         |

|                     |       |                     |                    |       |                     |
|---------------------|-------|---------------------|--------------------|-------|---------------------|
| ENSMUSG00000032369  | 0,863 | 0,001 Plscr1        | ENSMUSG00000030790 | 0,897 | 0,048 Adm           |
| ENSMUSG00000060568  | 0,863 | 0,009 Fam78b        | ENSMUSG00000105161 | 0,895 | 0,007 Gm42595       |
| ENSMUSG00000028268  | 0,861 | 0,000 Gbp3          | ENSMUSG00000110404 | 0,894 | 0,041 Rnf223        |
| ENSMUSG00000056501  | 0,858 | 0,009 Cebp          | ENSMUSG00000020656 | 0,894 | 0,000 Grhl1         |
| ENSMUSG00000017929  | 0,854 | 0,000 B4galt5       | ENSMUSG00000024871 | 0,892 | 0,022 Doc2g         |
| ENSMUSG00000040253  | 0,852 | 0,014 Gbp7          | ENSMUSG00000020812 | 0,891 | 0,000 1810032O08Rik |
| ENSMUSG00000026377  | 0,850 | 0,000 Nifk          | ENSMUSG00000028063 | 0,891 | 0,000 Lmna          |
| ENSMUSG00000023153  | 0,849 | 0,021 Tmem52        | ENSMUSG00000026435 | 0,886 | 0,013 Slc45a3       |
| ENSMUSG000000088088 | 0,848 | 0,008 Rmrp          | ENSMUSG00000025591 | 0,882 | 0,000 Tma16         |
| ENSMUSG00000115420  | 0,848 | 0,008 AL732506.1    | ENSMUSG00000058794 | 0,880 | 0,004 Nfe2          |
| ENSMUSG00000035692  | 0,845 | 0,002 lsg15         | ENSMUSG00000027395 | 0,880 | 0,000 Polr1b        |
| ENSMUSG00000046229  | 0,844 | 0,017 Scand1        | ENSMUSG00000049241 | 0,878 | 0,002 Hcar1         |
| ENSMUSG00000074800  | 0,843 | 0,028 Gm4149        | ENSMUSG00000040957 | 0,878 | 0,000 Cables1       |
| ENSMUSG00000057605  | 0,842 | 0,023 Gm6807        | ENSMUSG00000069805 | 0,877 | 0,041 Fbp1          |
| ENSMUSG00000097327  | 0,841 | 0,001 E030030106Rik | ENSMUSG00000023153 | 0,877 | 0,023 Tmem52        |
| ENSMUSG000000022900 | 0,840 | 0,003 lldr1         | ENSMUSG00000036452 | 0,876 | 0,000 Arhgap26      |
| ENSMUSG00000039236  | 0,839 | 0,008 lsg20         | ENSMUSG00000055865 | 0,875 | 0,036 Fam19a3       |
| ENSMUSG00000087590  | 0,838 | 0,013 Epb4114aos    | ENSMUSG00000024053 | 0,873 | 0,010 Emilin2       |
| ENSMUSG00000062353  | 0,834 | 0,020 Gm15772       | ENSMUSG00000044033 | 0,873 | 0,020 Ccdc141       |
| ENSMUSG00000038046  | 0,833 | 0,000 Mrm3          | ENSMUSG00000038335 | 0,871 | 0,000 Tsr1          |
| ENSMUSG00000063354  | 0,833 | 0,002 Slc39a4       | ENSMUSG00000025856 | 0,869 | 0,000 Pdgfa         |
| ENSMUSG00000049103  | 0,830 | 0,010 Ccr2          | ENSMUSG00000045180 | 0,867 | 0,006 Shroom2       |
| ENSMUSG000000032322 | 0,830 | 0,045 Pstpip1       | ENSMUSG00000024085 | 0,864 | 0,001 Man2a1        |
| ENSMUSG00000067870  | 0,830 | 0,019 Rpl31-ps8     | ENSMUSG00000024769 | 0,862 | 0,000 Cdc42bpg      |
| ENSMUSG00000021958  | 0,829 | 0,000 Pinx1         | ENSMUSG00000021149 | 0,861 | 0,000 Gtpbp4        |
| ENSMUSG00000028381  | 0,828 | 0,000 Ugcg          | ENSMUSG00000027907 | 0,859 | 0,007 S100a11       |
| ENSMUSG00000030170  | 0,826 | 0,024 Wnt5b         | ENSMUSG00000026875 | 0,857 | 0,006 Traf1         |
| ENSMUSG00000024843  | 0,826 | 0,000 Chka          | ENSMUSG00000065124 | 0,853 | 0,001 Snora65       |
| ENSMUSG00000028413  | 0,825 | 0,000 B4galt1       | ENSMUSG00000040328 | 0,848 | 0,026 Olfr56        |
| ENSMUSG00000031605  | 0,825 | 0,000 Klhl2         | ENSMUSG00000031700 | 0,845 | 0,000 Gpt2          |
| ENSMUSG00000009378  | 0,824 | 0,010 Slc16a12      | ENSMUSG00000020961 | 0,843 | 0,004 Ston2         |
| ENSMUSG00000044583  | 0,824 | 0,038 Tlr7          | ENSMUSG00000042608 | 0,841 | 0,000 Stk40         |
| ENSMUSG00000020599  | 0,824 | 0,006 Rgs9          | ENSMUSG00000060586 | 0,841 | 0,004 H2-Eb1        |
| ENSMUSG00000065922  | 0,823 | 0,008 n-R5-8s1      | ENSMUSG00000026833 | 0,841 | 0,006 Olfm1         |
| ENSMUSG00000004100  | 0,823 | 0,000 Ppan          | ENSMUSG00000114635 | 0,838 | 0,012 CT010498.2    |
| ENSMUSG00000066975  | 0,817 | 0,002 Cryba4        | ENSMUSG00000056749 | 0,837 | 0,000 Nfil3         |
| ENSMUSG00000114487  | 0,812 | 0,049 CT010498.1    | ENSMUSG00000106847 | 0,834 | 0,000 Peg13         |
| ENSMUSG00000023988  | 0,812 | 0,000 Bysl          | ENSMUSG00000080058 | 0,825 | 0,012 Gm11175       |
| ENSMUSG00000071757  | 0,812 | 0,000 Zhx2          | ENSMUSG00000037434 | 0,825 | 0,000 Slc30a1       |
| ENSMUSG00000015176  | 0,809 | 0,000 Nolc1         | ENSMUSG00000111291 | 0,824 | 0,005 AC124577.2    |
| ENSMUSG00000113165  | 0,809 | 0,001 AC115037.1    | ENSMUSG00000042349 | 0,824 | 0,016 lkbke         |
| ENSMUSG00000048216  | 0,809 | 0,014 Gpr85         | ENSMUSG00000086429 | 0,822 | 0,001 Gt(ROSA)26Sor |
| ENSMUSG00000030609  | 0,808 | 0,000 Aen           | ENSMUSG00000032656 | 0,817 | 0,041 March3        |
| ENSMUSG00000033538  | 0,807 | 0,015 Casp4         | ENSMUSG00000091996 | 0,817 | 0,008 BC049352      |
| ENSMUSG00000000184  | 0,805 | 0,001 Ccnd2         | ENSMUSG00000046204 | 0,813 | 0,006 Pnma2         |
| ENSMUSG00000061815  | 0,803 | 0,031 Rufy4         | ENSMUSG00000109015 | 0,811 | 0,007 Gm31024       |
| ENSMUSG00000032193  | 0,801 | 0,003 Ldlr          | ENSMUSG00000070780 | 0,808 | 0,000 Rbm47         |

|                     |       |                     |                    |       |                     |
|---------------------|-------|---------------------|--------------------|-------|---------------------|
| ENSMUSG00000109536  | 0,801 | 0,043 9330162G02Rik | ENSMUSG00000094626 | 0,808 | 0,032 Tmem121b      |
| ENSMUSG00000030521  | 0,801 | 0,000 Mphosph10     | ENSMUSG00000028771 | 0,806 | 0,000 Ptpn12        |
| ENSMUSG00000001588  | 0,799 | 0,030 Acap1         | ENSMUSG00000037254 | 0,803 | 0,045 Itih2         |
| ENSMUSG00000017652  | 0,799 | 0,012 Cd40          | ENSMUSG00000093327 | 0,802 | 0,003 Mir5107       |
| ENSMUSG00000008540  | 0,797 | 0,000 Mgst1         | ENSMUSG00000073421 | 0,801 | 0,008 H2-Ab1        |
| ENSMUSG000000021265 | 0,796 | 0,001 Slc25a29      | ENSMUSG00000058883 | 0,801 | 0,043 Zfp708        |
| ENSMUSG00000073599  | 0,796 | 0,005 Ecscr         | ENSMUSG00000028874 | 0,800 | 0,015 Fgr           |
| ENSMUSG00000050299  | 0,796 | 0,011 Gm9843        | ENSMUSG00000026576 | 0,799 | 0,009 Atp1b1        |
| ENSMUSG000000020205 | 0,795 | 0,000 Phlda1        | ENSMUSG00000052040 | 0,797 | 0,000 Klf13         |
| ENSMUSG00000019194  | 0,795 | 0,000 Scn1b         | ENSMUSG00000110945 | 0,796 | 0,022 Gm9856        |
| ENSMUSG00000038279  | 0,795 | 0,000 Nop2          | ENSMUSG00000068417 | 0,794 | 0,000 Pnp2          |
| ENSMUSG00000075602  | 0,794 | 0,041 Ly6a          | ENSMUSG00000020599 | 0,792 | 0,014 Rgs9          |
| ENSMUSG000000002983 | 0,794 | 0,000 Relb          | ENSMUSG00000022371 | 0,792 | 0,005 Col14a1       |
| ENSMUSG00000000776  | 0,792 | 0,000 Polr3d        | ENSMUSG00000074876 | 0,787 | 0,000 Spata51       |
| ENSMUSG00000021285  | 0,791 | 0,000 Ppp1r13b      | ENSMUSG00000097327 | 0,781 | 0,002 E030030I06Rik |
| ENSMUSG000000039699 | 0,791 | 0,010 Batf2         | ENSMUSG00000076441 | 0,779 | 0,020 Ass1          |
| ENSMUSG00000032561  | 0,790 | 0,018 Acpp          | ENSMUSG00000022661 | 0,776 | 0,016 Cd200         |
| ENSMUSG00000063193  | 0,786 | 0,011 Cd300lb       | ENSMUSG00000113165 | 0,775 | 0,004 AC115037.1    |
| ENSMUSG00000024486  | 0,784 | 0,001 Hbegf         | ENSMUSG00000110275 | 0,772 | 0,003 Gm5905        |
| ENSMUSG000000084416 | 0,782 | 0,019 Rpl10a-ps1    | ENSMUSG00000078490 | 0,770 | 0,001 Cfap74        |
| ENSMUSG00000090439  | 0,780 | 0,040 Gm17455       | ENSMUSG00000030203 | 0,768 | 0,000 Dusp16        |
| ENSMUSG00000041057  | 0,780 | 0,000 Wdr43         | ENSMUSG00000036381 | 0,767 | 0,036 P2ry14        |
| ENSMUSG000000038296 | 0,778 | 0,000 Galnt18       | ENSMUSG00000039782 | 0,766 | 0,023 Cpeb2         |
| ENSMUSG00000028063  | 0,775 | 0,001 Lmna          | ENSMUSG00000097743 | 0,765 | 0,001 Gm16973       |
| ENSMUSG00000031578  | 0,773 | 0,000 Mak16         | ENSMUSG00000048807 | 0,765 | 0,000 Slc35e4       |
| ENSMUSG00000024087  | 0,772 | 0,018 Cyp1b1        | ENSMUSG00000050860 | 0,758 | 0,001 Phospho1      |
| ENSMUSG000000090069 | 0,772 | 0,038 E430024P14Rik | ENSMUSG00000015843 | 0,755 | 0,020 Rxrg          |
| ENSMUSG00000002233  | 0,770 | 0,000 Rhoc          | ENSMUSG00000027508 | 0,754 | 0,018 Pag1          |
| ENSMUSG00000026728  | 0,769 | 0,000 Vim           | ENSMUSG00000039153 | 0,752 | 0,046 Runx2         |
| ENSMUSG000000024754 | 0,769 | 0,008 Tmem2         | ENSMUSG00000085156 | 0,750 | 0,000 Snhg15        |
| ENSMUSG00000018012  | 0,768 | 0,000 Rac3          | ENSMUSG00000008734 | 0,749 | 0,000 Gprc5b        |
| ENSMUSG00000003153  | 0,768 | 0,000 Slc2a3        | ENSMUSG00000046791 | 0,748 | 0,000 Riox1         |
| ENSMUSG00000078974  | 0,767 | 0,008 Sec61g        | ENSMUSG00000015176 | 0,746 | 0,000 Nolc1         |
| ENSMUSG000000021453 | 0,767 | 0,003 Gadd45g       | ENSMUSG00000054263 | 0,746 | 0,018 Lifr          |
| ENSMUSG00000028840  | 0,766 | 0,000 Zfp593        | ENSMUSG00000035673 | 0,745 | 0,001 Sbno2         |
| ENSMUSG00000035673  | 0,766 | 0,000 Sbno2         | ENSMUSG00000063193 | 0,744 | 0,028 Cd300lb       |
| ENSMUSG000000049225 | 0,764 | 0,000 Pdp1          | ENSMUSG00000042821 | 0,741 | 0,003 Snai1         |
| ENSMUSG00000040093  | 0,764 | 0,003 Bmf           | ENSMUSG00000027765 | 0,739 | 0,031 P2ry1         |
| ENSMUSG00000042417  | 0,763 | 0,047 Ccno          | ENSMUSG00000049999 | 0,738 | 0,000 Ppp1r3d       |
| ENSMUSG00000068099  | 0,763 | 0,002 1500009C09Rik | ENSMUSG00000004100 | 0,737 | 0,000 Ppan          |
| ENSMUSG00000006360  | 0,763 | 0,042 Crip1         | ENSMUSG00000040451 | 0,736 | 0,003 Sgms1         |
| ENSMUSG00000026796  | 0,763 | 0,000 Fam129b       | ENSMUSG00000099109 | 0,733 | 0,046 Mir7115       |
| ENSMUSG00000040447  | 0,763 | 0,003 Spns2         | ENSMUSG00000044576 | 0,733 | 0,003 Garem2        |
| ENSMUSG000000074466 | 0,763 | 0,015 Gm15417       | ENSMUSG00000052776 | 0,731 | 0,005 Oas1a         |
| ENSMUSG00000104367  | 0,761 | 0,018 Gm38079       | ENSMUSG00000092035 | 0,730 | 0,007 Peg10         |
| ENSMUSG00000031837  | 0,761 | 0,019 Necab2        | ENSMUSG00000087365 | 0,730 | 0,022 C430049B03Rik |
| ENSMUSG00000000957  | 0,760 | 0,000 Mmp14         | ENSMUSG00000071637 | 0,728 | 0,013 Cebpd         |

|                     |       |                    |                     |       |                     |
|---------------------|-------|--------------------|---------------------|-------|---------------------|
| ENSMUSG00000044197  | 0,758 | 0,000 Gpr146       | ENSMUSG00000057561  | 0,728 | 0,000 Eif1a         |
| ENSMUSG00000069899  | 0,757 | 0,018 Gm12166      | ENSMUSG00000028967  | 0,727 | 0,000 Errf1         |
| ENSMUSG00000015476  | 0,755 | 0,039 Prrt1        | ENSMUSG00000002881  | 0,726 | 0,000 Nab1          |
| ENSMUSG00000022146  | 0,752 | 0,034 Osmr         | ENSMUSG00000044345  | 0,725 | 0,001 Marveld1      |
| ENSMUSG00000079508  | 0,752 | 0,017 Apoo         | ENSMUSG00000079508  | 0,722 | 0,039 Apoo          |
| ENSMUSG00000054934  | 0,750 | 0,045 Kcnmb4       | ENSMUSG00000005237  | 0,722 | 0,014 Dnah2         |
| ENSMUSG00000027236  | 0,749 | 0,000 Eif3j1       | ENSMUSG00000085385  | 0,720 | 0,000 Shhg17        |
| ENSMUSG00000002881  | 0,748 | 0,000 Nab1         | ENSMUSG00000028381  | 0,719 | 0,000 Ugcg          |
| ENSMUSG000000031490 | 0,748 | 0,005 Eif4ebp1     | ENSMUSG00000049225  | 0,718 | 0,000 Pdp1          |
| ENSMUSG00000096974  | 0,748 | 0,028 Gm26881      | ENSMUSG00000021453  | 0,718 | 0,009 Gadd45g       |
| ENSMUSG00000039450  | 0,747 | 0,000 Dcxr         | ENSMUSG00000033721  | 0,718 | 0,002 Vav3          |
| ENSMUSG00000030203  | 0,747 | 0,000 Dusp16       | ENSMUSG00000038264  | 0,717 | 0,035 Sema7a        |
| ENSMUSG00000011008  | 0,746 | 0,047 Mcoln2       | ENSMUSG00000079445  | 0,716 | 0,004 B3gnt7        |
| ENSMUSG00000035295  | 0,746 | 0,037 Wdr38        | ENSMUSG00000046794  | 0,713 | 0,004 Ppp1r3b       |
| ENSMUSG00000097906  | 0,745 | 0,000 Gm9625       | ENSMUSG00000024754  | 0,711 | 0,023 Tmem2         |
| ENSMUSG000000085355 | 0,745 | 0,029 301003L21Rik | ENSMUSG00000038279  | 0,710 | 0,000 Nop2          |
| ENSMUSG00000017715  | 0,743 | 0,000 Pgs1         | ENSMUSG00000046879  | 0,708 | 0,000 Irgm1         |
| ENSMUSG00000027076  | 0,743 | 0,000 Timm10       | ENSMUSG00000067931  | 0,707 | 0,012 Zfp948        |
| ENSMUSG00000033777  | 0,743 | 0,001 Tlr13        | ENSMUSG00000033355  | 0,707 | 0,000 Rtp4          |
| ENSMUSG00000045538  | 0,742 | 0,000 Ddx28        | ENSMUSG00000087412  | 0,706 | 0,043 Gm15501       |
| ENSMUSG00000050860  | 0,741 | 0,001 Phospho1     | ENSMUSG00000024732  | 0,703 | 0,000 Ccdc86        |
| ENSMUSG00000001630  | 0,740 | 0,000 Stk38l       | ENSMUSG00000038046  | 0,703 | 0,001 Mrm3          |
| ENSMUSG000000051435 | 0,738 | 0,000 Fhad1        | ENSMUSG00000000776  | 0,703 | 0,000 Polr3d        |
| ENSMUSG00000036390  | 0,736 | 0,000 Gadd45a      | ENSMUSG00000040093  | 0,701 | 0,011 Bmf           |
| ENSMUSG00000037966  | 0,734 | 0,000 Ninj1        | ENSMUSG00000030521  | 0,699 | 0,000 Mphosph10     |
| ENSMUSG00000027508  | 0,733 | 0,016 Pag1         | ENSMUSG00000022305  | 0,697 | 0,007 Lrp12         |
| ENSMUSG000000028010 | 0,733 | 0,000 Gar1         | ENSMUSG00000025357  | 0,697 | 0,000 Dgka          |
| ENSMUSG00000047090  | 0,732 | 0,000 Tmem198b     | ENSMUSG00000002617  | 0,695 | 0,003 Zfp40         |
| ENSMUSG00000038489  | 0,730 | 0,002 Polr2l       | ENSMUSG00000008540  | 0,695 | 0,001 Mgst1         |
| ENSMUSG000000029570 | 0,730 | 0,000 Lfng         | ENSMUSG00000038342  | 0,693 | 0,002 Mlxip         |
| ENSMUSG00000040957  | 0,729 | 0,000 Cables1      | ENSMUSG00000024042  | 0,692 | 0,014 Sik1          |
| ENSMUSG00000091509  | 0,728 | 0,002 Gm17066      | ENSMUSG00000034570  | 0,691 | 0,018 Inpp5j        |
| ENSMUSG00000085436  | 0,728 | 0,010 Zfp335os     | ENSMUSG00000085492  | 0,687 | 0,000 Trmt61b       |
| ENSMUSG00000031304  | 0,727 | 0,019 Il2rg        | ENSMUSG00000022957  | 0,687 | 0,000 Itsn1         |
| ENSMUSG00000060032  | 0,727 | 0,016 H2afj        | ENSMUSG00000085316  | 0,686 | 0,039 D330050G23Rik |
| ENSMUSG00000040451  | 0,727 | 0,002 Sgms1        | ENSMUSG00000024985  | 0,686 | 0,000 Tcf7l2        |
| ENSMUSG000000041506 | 0,727 | 0,000 Rrp9         | ENSMUSG000000027375 | 0,685 | 0,027 Mal           |
| ENSMUSG00000053414  | 0,724 | 0,029 Hunk         | ENSMUSG00000003153  | 0,682 | 0,001 Slc2a3        |
| ENSMUSG00000020656  | 0,724 | 0,000 Grhl1        | ENSMUSG00000040829  | 0,681 | 0,038 Zmynd15       |
| ENSMUSG00000028108  | 0,724 | 0,001 Ecm1         | ENSMUSG00000071757  | 0,680 | 0,000 Zhx2          |
| ENSMUSG00000016664  | 0,723 | 0,000 Pacsin2      | ENSMUSG00000047735  | 0,679 | 0,017 Samd9l        |
| ENSMUSG00000018920  | 0,720 | 0,013 Cxcl16       | ENSMUSG00000030609  | 0,679 | 0,000 Aen           |
| ENSMUSG00000052253  | 0,718 | 0,000 Zfp622       | ENSMUSG00000046223  | 0,678 | 0,005 Plaur         |
| ENSMUSG000000027596 | 0,716 | 0,010 a            | ENSMUSG00000024778  | 0,678 | 0,020 Fas           |
| ENSMUSG00000026875  | 0,716 | 0,016 Traf1        | ENSMUSG00000031578  | 0,678 | 0,000 Mak16         |
| ENSMUSG00000050212  | 0,716 | 0,002 Eva1b        | ENSMUSG00000045672  | 0,675 | 0,000 Col27a1       |
| ENSMUSG00000027221  | 0,715 | 0,000 Chst1        | ENSMUSG00000093677  | 0,675 | 0,033 Gm20712       |



|                     |       |                     |                     |       |                     |
|---------------------|-------|---------------------|---------------------|-------|---------------------|
| ENSMUSG00000064307  | 0,715 | 0,045 Lrrc51        | ENSMUSG00000032119  | 0,674 | 0,000 Hinfp         |
| ENSMUSG00000034614  | 0,714 | 0,006 Pik3ip1       | ENSMUSG00000026981  | 0,673 | 0,044 Il1rn         |
| ENSMUSG00000022372  | 0,713 | 0,012 Sla           | ENSMUSG00000028069  | 0,673 | 0,001 Gpatch4       |
| ENSMUSG00000068417  | 0,713 | 0,000 Pnp2          | ENSMUSG00000010358  | 0,672 | 0,004 Ifi35         |
| ENSMUSG00000048007  | 0,710 | 0,007 Timm8a1       | ENSMUSG00000031825  | 0,672 | 0,011 Crispld2      |
| ENSMUSG00000031839  | 0,710 | 0,000 Hsbp1         | ENSMUSG00000030409  | 0,671 | 0,038 Dmpk          |
| ENSMUSG00000042854  | 0,709 | 0,000 Trp53rkb      | ENSMUSG00000031880  | 0,670 | 0,025 Rrad          |
| ENSMUSG00000025290  | 0,709 | 0,012 Rps24         | ENSMUSG00000025887  | 0,670 | 0,025 Casp12        |
| ENSMUSG00000025402  | 0,709 | 0,000 Nab2          | ENSMUSG00000031605  | 0,669 | 0,000 Kihl2         |
| ENSMUSG00000025171  | 0,708 | 0,000 Ubtd1         | ENSMUSG00000056888  | 0,668 | 0,000 Glipr1        |
| ENSMUSG00000020121  | 0,704 | 0,011 Srgap1        | ENSMUSG00000037904  | 0,667 | 0,027 Ankrd9        |
| ENSMUSG00000039084  | 0,703 | 0,031 Chad          | ENSMUSG00000002058  | 0,667 | 0,006 Unc119        |
| ENSMUSG00000022371  | 0,703 | 0,010 Col14a1       | ENSMUSG00000050335  | 0,666 | 0,003 Lgals3        |
| ENSMUSG00000000732  | 0,702 | 0,000 Icosl         | ENSMUSG00000049950  | 0,663 | 0,004 Rpp38         |
| ENSMUSG00000021687  | 0,700 | 0,000 Scamp1        | ENSMUSG00000097772  | 0,662 | 0,001 5430416N02Rik |
| ENSMUSG000000028948 | 0,700 | 0,000 Nol9          | ENSMUSG00000053063  | 0,661 | 0,035 Clec12a       |
| ENSMUSG00000030403  | 0,699 | 0,000 Vasp          | ENSMUSG00000028128  | 0,657 | 0,046 F3            |
| ENSMUSG00000015337  | 0,699 | 0,006 Endog         | ENSMUSG00000037692  | 0,657 | 0,000 Ahdc1         |
| ENSMUSG00000042745  | 0,698 | 0,011 Id1           | ENSMUSG00000054855  | 0,656 | 0,005 Rnd1          |
| ENSMUSG00000001020  | 0,697 | 0,032 S100a4        | ENSMUSG00000041057  | 0,652 | 0,000 Wdr43         |
| ENSMUSG00000036278  | 0,696 | 0,003 Macrod1       | ENSMUSG00000038888  | 0,652 | 0,000 Ctu1          |
| ENSMUSG00000083621  | 0,694 | 0,045 Gm14586       | ENSMUSG00000021958  | 0,651 | 0,000 Pinx1         |
| ENSMUSG000000042729 | 0,694 | 0,000 Wdr74         | ENSMUSG00000020798  | 0,651 | 0,022 Spns3         |
| ENSMUSG00000035397  | 0,694 | 0,000 Klf16         | ENSMUSG000000101628 | 0,650 | 0,040 Gm28177       |
| ENSMUSG00000025869  | 0,694 | 0,000 Nop16         | ENSMUSG00000016552  | 0,650 | 0,045 Foxred2       |
| ENSMUSG00000000409  | 0,692 | 0,027 Lck           | ENSMUSG00000036948  | 0,649 | 0,000 BC037034      |
| ENSMUSG00000097772  | 0,692 | 0,000 5430416N02Rik | ENSMUSG00000022351  | 0,648 | 0,007 Sqle          |
| ENSMUSG00000020484  | 0,692 | 0,000 Xbp1          | ENSMUSG00000003617  | 0,648 | 0,027 Cp            |
| ENSMUSG0000002058   | 0,692 | 0,002 Unc119        | ENSMUSG00000043079  | 0,648 | 0,010 Synpo         |
| ENSMUSG00000023272  | 0,690 | 0,000 Creld2        | ENSMUSG00000031146  | 0,645 | 0,014 Plp2          |
| ENSMUSG00000021493  | 0,690 | 0,012 Pdlim7        | ENSMUSG00000021493  | 0,644 | 0,033 Pdlim7        |
| ENSMUSG00000110423  | 0,689 | 0,000 Gm45736       | ENSMUSG00000089762  | 0,641 | 0,022 Ier5l         |
| ENSMUSG00000039725  | 0,688 | 0,000 Trp53rka      | ENSMUSG00000036533  | 0,641 | 0,012 Cdc42ep3      |
| ENSMUSG00000022864  | 0,688 | 0,003 D16Erttd472e  | ENSMUSG00000026377  | 0,639 | 0,000 Nifk          |
| ENSMUSG00000021508  | 0,688 | 0,008 Cxcl14        | ENSMUSG00000037260  | 0,639 | 0,000 Hgsnat        |
| ENSMUSG00000063694  | 0,687 | 0,000 Cyps          | ENSMUSG00000000732  | 0,637 | 0,001 Icosl         |
| ENSMUSG000000045690 | 0,686 | 0,003 Wdr89         | ENSMUSG00000043421  | 0,637 | 0,000 Hilpda        |
| ENSMUSG00000033721  | 0,685 | 0,003 Vav3          | ENSMUSG00000001707  | 0,636 | 0,000 Eef1e1        |
| ENSMUSG00000024608  | 0,684 | 0,007 Rps14         | ENSMUSG00000019846  | 0,635 | 0,003 Lama4         |
| ENSMUSG00000039985  | 0,684 | 0,009 Fam60a        | ENSMUSG00000021285  | 0,633 | 0,000 Ppp1r13b      |
| ENSMUSG00000085492  | 0,683 | 0,000 Trmt61b       | ENSMUSG00000028413  | 0,633 | 0,000 B4galt1       |
| ENSMUSG00000017765  | 0,683 | 0,000 Slc12a4       | ENSMUSG00000067653  | 0,631 | 0,001 Ankrd23       |
| ENSMUSG00000027215  | 0,683 | 0,000 Cd82          | ENSMUSG00000014778  | 0,629 | 0,000 Fhod1         |
| ENSMUSG000000022247 | 0,682 | 0,000 Brix1         | ENSMUSG00000053801  | 0,629 | 0,000 Grwd1         |
| ENSMUSG00000020812  | 0,681 | 0,002 1810032O08Rik | ENSMUSG00000051435  | 0,628 | 0,001 Fhad1         |
| ENSMUSG00000046410  | 0,681 | 0,017 Kcnk6         | ENSMUSG00000034818  | 0,627 | 0,045 Celf5         |
| ENSMUSG00000026107  | 0,678 | 0,042 Nabp1         | ENSMUSG00000097392  | 0,627 | 0,000 D930016D06Rik |

|                      |       |                 |                     |       |                     |
|----------------------|-------|-----------------|---------------------|-------|---------------------|
| ENSMUSG00000013846   | 0,677 | 0,020 St3gal1   | ENSMUSG00000002983  | 0,626 | 0,001 Relb          |
| ENSMUSG000000032841  | 0,676 | 0,004 Prr5l     | ENSMUSG000000025650 | 0,625 | 0,010 Col7a1        |
| ENSMUSG000000003070  | 0,676 | 0,036 Efn2      | ENSMUSG000000041438 | 0,624 | 0,000 Utp4          |
| ENSMUSG000000027333  | 0,676 | 0,000 Smox      | ENSMUSG00000001630  | 0,623 | 0,002 Stk38l        |
| ENSMUSG000000020399  | 0,675 | 0,037 Havcr2    | ENSMUSG000000007617 | 0,623 | 0,004 Homer1        |
| ENSMUSG000000115338  | 0,675 | 0,000 Pnp       | ENSMUSG000000026104 | 0,622 | 0,000 Stat1         |
| ENSMUSG000000023068  | 0,674 | 0,000 Nus1      | ENSMUSG000000091509 | 0,622 | 0,015 Gm17066       |
| ENSMUSG000000049744  | 0,673 | 0,034 Arhgap15  | ENSMUSG000000026970 | 0,620 | 0,000 Rbms1         |
| ENSMUSG0000000018339 | 0,673 | 0,000 Gpx3      | ENSMUSG000000028717 | 0,619 | 0,008 Tal1          |
| ENSMUSG000000003283  | 0,672 | 0,004 Hck       | ENSMUSG000000069049 | 0,617 | 0,005 Eif2s3y       |
| ENSMUSG000000021871  | 0,671 | 0,000 Pnp       | ENSMUSG000000032802 | 0,617 | 0,000 Srxn1         |
| ENSMUSG000000038510  | 0,670 | 0,000 Rpf2      | ENSMUSG000000051495 | 0,617 | 0,000 Irf2bp2       |
| ENSMUSG000000025436  | 0,670 | 0,000 Atp23     | ENSMUSG000000114771 | 0,616 | 0,043 AC163667.1    |
| ENSMUSG000000026069  | 0,667 | 0,002 Il1rl1    | ENSMUSG000000038296 | 0,616 | 0,006 Galnt18       |
| ENSMUSG000000026576  | 0,667 | 0,023 Atp1b1    | ENSMUSG000000074622 | 0,616 | 0,000 Mafb          |
| ENSMUSG0000000074876 | 0,666 | 0,000 Spata5l1  | ENSMUSG000000017715 | 0,614 | 0,000 Pgs1          |
| ENSMUSG000000031431  | 0,666 | 0,001 Tsc22d3   | ENSMUSG000000073775 | 0,613 | 0,000 Kti12         |
| ENSMUSG000000041390  | 0,664 | 0,003 Mdfic     | ENSMUSG00000000184  | 0,613 | 0,028 Ccnd2         |
| ENSMUSG000000022554  | 0,663 | 0,000 Hgh1      | ENSMUSG000000022960 | 0,611 | 0,000 Donson        |
| ENSMUSG000000098178  | 0,662 | 0,042 Gm42418   | ENSMUSG000000027583 | 0,610 | 0,000 Zbtb46        |
| ENSMUSG000000038274  | 0,662 | 0,015 Fau       | ENSMUSG000000021365 | 0,608 | 0,003 Nedd9         |
| ENSMUSG000000064109  | 0,660 | 0,035 Hcst      | ENSMUSG000000040447 | 0,607 | 0,036 Spns2         |
| ENSMUSG0000000033294 | 0,659 | 0,000 Noc4l     | ENSMUSG000000028840 | 0,606 | 0,005 Zfp593        |
| ENSMUSG000000023905  | 0,659 | 0,011 Tnfrsf12a | ENSMUSG000000097906 | 0,606 | 0,000 Gm9625        |
| ENSMUSG000000026305  | 0,659 | 0,000 Lrrfip1   | ENSMUSG000000046667 | 0,606 | 0,001 Rbm12b1       |
| ENSMUSG000000043439  | 0,659 | 0,002 Epop      | ENSMUSG000000040033 | 0,606 | 0,003 Stat2         |
| ENSMUSG000000070284  | 0,659 | 0,000 Gmppb     | ENSMUSG000000028948 | 0,604 | 0,000 Nol9          |
| ENSMUSG000000044345  | 0,658 | 0,001 Marveld1  | ENSMUSG000000034579 | 0,601 | 0,038 Pla2g3        |
| ENSMUSG000000032109  | 0,657 | 0,000 Nlrx1     | ENSMUSG000000104950 | 0,600 | 0,004 4833413G10Rik |
| ENSMUSG0000000058794 | 0,657 | 0,031 Nfe2      | ENSMUSG000000063972 | 0,599 | 0,010 Nr6a1         |
| ENSMUSG000000038845  | 0,657 | 0,004 Phb       | ENSMUSG000000075585 | 0,599 | 0,001 6330403L08Rik |
| ENSMUSG000000055137  | 0,656 | 0,001 Sugct     | ENSMUSG000000067212 | 0,598 | 0,000 H2-T23        |
| ENSMUSG000000024085  | 0,654 | 0,016 Man2a1    | ENSMUSG000000022864 | 0,597 | 0,017 D16Ert472e    |
| ENSMUSG000000054720  | 0,653 | 0,001 Lrrc8c    | ENSMUSG000000026305 | 0,594 | 0,000 Lrrfip1       |
| ENSMUSG000000038264  | 0,653 | 0,044 Sema7a    | ENSMUSG000000098465 | 0,594 | 0,033 Mir1668       |
| ENSMUSG000000020806  | 0,652 | 0,019 Rhbdf2    | ENSMUSG000000025813 | 0,593 | 0,036 Homer2        |
| ENSMUSG0000000049482 | 0,651 | 0,000 Ctu2      | ENSMUSG000000115338 | 0,593 | 0,000 Pnp           |
| ENSMUSG000000060216  | 0,651 | 0,000 Arrb2     | ENSMUSG000000009741 | 0,593 | 0,000 Ubp1          |
| ENSMUSG000000050244  | 0,651 | 0,000 Heatr1    | ENSMUSG00000017929  | 0,593 | 0,000 B4galt5       |
| ENSMUSG000000070462  | 0,650 | 0,000 Tlnrd1    | ENSMUSG00000019487  | 0,593 | 0,000 Trip10        |
| ENSMUSG000000027765  | 0,649 | 0,039 P2ry1     | ENSMUSG000000097000 | 0,592 | 0,016 Gm17435       |
| ENSMUSG000000089762  | 0,648 | 0,014 Ier5l     | ENSMUSG000000098794 | 0,591 | 0,001 Gm28038       |
| ENSMUSG000000034686  | 0,648 | 0,034 Prr7      | ENSMUSG000000021871 | 0,590 | 0,000 Pnp           |
| ENSMUSG0000000032802 | 0,648 | 0,000 Srxn1     | ENSMUSG000000032841 | 0,589 | 0,024 Prr5l         |
| ENSMUSG000000017679  | 0,648 | 0,000 Ttpal     | ENSMUSG000000060950 | 0,588 | 0,000 Trmt61a       |
| ENSMUSG000000015843  | 0,647 | 0,040 Rxrg      | ENSMUSG000000039470 | 0,588 | 0,000 Zdhhc2        |
| ENSMUSG000000006442  | 0,646 | 0,000 Srm       | ENSMUSG000000043183 | 0,587 | 0,001 Simc1         |

|                      |       |                     |                     |       |                |
|----------------------|-------|---------------------|---------------------|-------|----------------|
| ENSMUSG00000054871   | 0,645 | 0,022 Tmem158       | ENSMUSG00000049939  | 0,587 | 0,003 Lrrc4    |
| ENSMUSG00000029642   | 0,645 | 0,002 Polr1d        | ENSMUSG00000027236  | 0,585 | 0,000 Eif3j1   |
| ENSMUSG00000087651   | 0,644 | 0,024 1500009L16Rik | ENSMUSG00000002885  | 0,585 | 0,007 Adgre5   |
| ENSMUSG00000003206   | 0,644 | 0,006 Ebi3          | ENSMUSG00000031024  | 0,585 | 0,000 St5      |
| ENSMUSG000000036256  | 0,644 | 0,047 Igfbp7        | ENSMUSG000000086150 | 0,585 | 0,037 Bach2os  |
| ENSMUSG000000041203  | 0,644 | 0,003 Trir          | ENSMUSG000000017679 | 0,583 | 0,000 Ttpal    |
| ENSMUSG000000037260  | 0,642 | 0,000 Hgsnat        | ENSMUSG000000026728 | 0,583 | 0,002 Vim      |
| ENSMUSG00000020075   | 0,641 | 0,000 Ddx21         | ENSMUSG000000033909 | 0,582 | 0,000 Usp36    |
| ENSMUSG000000112429  | 0,640 | 0,001 AC131081.1    | ENSMUSG000000042364 | 0,581 | 0,000 Snx18    |
| ENSMUSG00000015950   | 0,640 | 0,020 Ncf1          | ENSMUSG000000044149 | 0,580 | 0,000 Nkrf     |
| ENSMUSG00000070476   | 0,638 | 0,000 Fam217b       | ENSMUSG000000033545 | 0,579 | 0,000 Znrf1    |
| ENSMUSG000000050796  | 0,637 | 0,000 B3galt6       | ENSMUSG000000043243 | 0,578 | 0,011 Fam129c  |
| ENSMUSG000000035049  | 0,637 | 0,000 Rrp12         | ENSMUSG000000031939 | 0,578 | 0,002 Taf1d    |
| ENSMUSG000000022876  | 0,636 | 0,002 Samsn1        | ENSMUSG000000039633 | 0,577 | 0,009 Lonrf1   |
| ENSMUSG000000087305  | 0,636 | 0,007 A430035B10Rik | ENSMUSG000000078651 | 0,576 | 0,005 Aoc2     |
| ENSMUSG000000020044  | 0,634 | 0,038 Timp3         | ENSMUSG000000044197 | 0,576 | 0,001 Gpr146   |
| ENSMUSG000000031511  | 0,633 | 0,000 Arhgef7       | ENSMUSG000000028261 | 0,575 | 0,000 Ndufaf4  |
| ENSMUSG00000105161   | 0,633 | 0,049 Gm42595       | ENSMUSG000000042354 | 0,574 | 0,000 Gnl3     |
| ENSMUSG000000063480  | 0,632 | 0,000 Snu13         | ENSMUSG000000109941 | 0,571 | 0,032 Exosc6   |
| ENSMUSG000000033467  | 0,631 | 0,006 Crif2         | ENSMUSG000000046768 | 0,570 | 0,019 Rhoj     |
| ENSMUSG000000007617  | 0,631 | 0,002 Homer1        | ENSMUSG000000026158 | 0,569 | 0,000 Ogfr1    |
| ENSMUSG000000033147  | 0,630 | 0,037 Slc22a15      | ENSMUSG000000000957 | 0,567 | 0,001 Mmp14    |
| ENSMUSG0000000043388 | 0,629 | 0,043 Tmem130       | ENSMUSG000000020075 | 0,566 | 0,000 Ddx21    |
| ENSMUSG000000023017  | 0,629 | 0,013 Asic1         | ENSMUSG000000000317 | 0,566 | 0,049 Bcl6b    |
| ENSMUSG000000083992  | 0,625 | 0,027 Gm11478       | ENSMUSG000000034842 | 0,562 | 0,026 Art3     |
| ENSMUSG000000027540  | 0,623 | 0,000 Ptpn1         | ENSMUSG000000032103 | 0,561 | 0,000 Pus3     |
| ENSMUSG000000029552  | 0,622 | 0,017 Tes           | ENSMUSG000000034709 | 0,560 | 0,000 Ppp1r21  |
| ENSMUSG000000003848  | 0,622 | 0,000 Nob1          | ENSMUSG000000025359 | 0,559 | 0,005 Pmel     |
| ENSMUSG000000025508  | 0,621 | 0,046 Rplp2         | ENSMUSG000000030701 | 0,559 | 0,035 Plekhh1  |
| ENSMUSG000000002699  | 0,620 | 0,003 Lcp2          | ENSMUSG000000028248 | 0,559 | 0,046 Pnir     |
| ENSMUSG000000051652  | 0,618 | 0,014 Lrrc3         | ENSMUSG000000023988 | 0,556 | 0,000 Bysl     |
| ENSMUSG000000042364  | 0,617 | 0,000 Snx18         | ENSMUSG000000018899 | 0,554 | 0,028 Irf1     |
| ENSMUSG000000051518  | 0,617 | 0,005 Rps19bp1      | ENSMUSG000000099041 | 0,554 | 0,024 Gm28035  |
| ENSMUSG0000000082433 | 0,616 | 0,037 Gm9025        | ENSMUSG000000101166 | 0,553 | 0,004 Gm28496  |
| ENSMUSG000000049950  | 0,616 | 0,006 Rpp38         | ENSMUSG000000054321 | 0,552 | 0,006 Taf4b    |
| ENSMUSG000000031799  | 0,615 | 0,000 Tpm4          | ENSMUSG000000039361 | 0,550 | 0,001 Picalm   |
| ENSMUSG0000000005374 | 0,615 | 0,000 Tbl2          | ENSMUSG000000017765 | 0,550 | 0,000 Slc12a4  |
| ENSMUSG000000034842  | 0,612 | 0,007 Art3          | ENSMUSG000000000916 | 0,549 | 0,000 Nsun5    |
| ENSMUSG00000114429   | 0,612 | 0,037 AC113060.1    | ENSMUSG000000020484 | 0,548 | 0,000 Xbp1     |
| ENSMUSG000000029752  | 0,611 | 0,010 Asns          | ENSMUSG000000026069 | 0,547 | 0,023 Il1r1    |
| ENSMUSG0000000028633 | 0,611 | 0,000 Ctps          | ENSMUSG000000046994 | 0,547 | 0,016 Mars2    |
| ENSMUSG000000001305  | 0,610 | 0,000 Rrp15         | ENSMUSG000000036560 | 0,546 | 0,010 Lgi4     |
| ENSMUSG000000036948  | 0,609 | 0,000 BC037034      | ENSMUSG000000055945 | 0,546 | 0,027 Prr18    |
| ENSMUSG0000000071568 | 0,609 | 0,029 Gm5874        | ENSMUSG000000016664 | 0,545 | 0,000 Pacsin2  |
| ENSMUSG0000000005672 | 0,609 | 0,042 Kit           | ENSMUSG000000047090 | 0,545 | 0,000 Tmem198b |
| ENSMUSG000000062093  | 0,608 | 0,031 Gm10110       | ENSMUSG000000025762 | 0,543 | 0,000 Larp1b   |
| ENSMUSG000000099764  | 0,608 | 0,043 Rps10-ps2     | ENSMUSG000000029657 | 0,542 | 0,003 Hsph1    |

|                     |       |       |           |                     |       |       |               |
|---------------------|-------|-------|-----------|---------------------|-------|-------|---------------|
| ENSMUSG00000026158  | 0,608 | 0,000 | Ogfr1     | ENSMUSG00000053907  | 0,541 | 0,000 | Mat2a         |
| ENSMUSG00000074825  | 0,607 | 0,000 | Itprlp1   | ENSMUSG00000028633  | 0,540 | 0,000 | Ctps          |
| ENSMUSG00000044968  | 0,606 | 0,007 | Napepld   | ENSMUSG00000034203  | 0,537 | 0,000 | Chchd4        |
| ENSMUSG00000037960  | 0,605 | 0,000 | Card19    | ENSMUSG00000042766  | 0,537 | 0,041 | Trim46        |
| ENSMUSG00000022255  | 0,605 | 0,001 | Mtdh      | ENSMUSG00000038510  | 0,536 | 0,002 | Rpf2          |
| ENSMUSG00000031604  | 0,605 | 0,000 | Msmo1     | ENSMUSG00000027368  | 0,535 | 0,026 | Dusp2         |
| ENSMUSG00000000916  | 0,605 | 0,000 | Nsun5     | ENSMUSG00000027405  | 0,535 | 0,000 | Nop56         |
| ENSMUSG00000049232  | 0,604 | 0,000 | Tigd2     | ENSMUSG00000037447  | 0,535 | 0,018 | Arid5a        |
| ENSMUSG000000031608 | 0,603 | 0,015 | Galnt7    | ENSMUSG00000028645  | 0,534 | 0,001 | Slc2a1        |
| ENSMUSG00000062373  | 0,603 | 0,000 | Tmem65    | ENSMUSG00000012429  | 0,534 | 0,017 | Mplkip        |
| ENSMUSG00000028261  | 0,601 | 0,000 | Ndufaf4   | ENSMUSG00000025236  | 0,534 | 0,000 | Adpgk         |
| ENSMUSG00000028741  | 0,600 | 0,002 | Mrto4     | ENSMUSG00000030403  | 0,533 | 0,000 | Vasp          |
| ENSMUSG00000020307  | 0,598 | 0,001 | Cdc34     | ENSMUSG00000028108  | 0,533 | 0,024 | Ecm1          |
| ENSMUSG00000043998  | 0,598 | 0,000 | Mgat2     | ENSMUSG00000040723  | 0,533 | 0,000 | Rcsd1         |
| ENSMUSG00000024985  | 0,595 | 0,001 | Tcf7l2    | ENSMUSG00000032109  | 0,532 | 0,000 | Nlr1          |
| ENSMUSG000000085894 | 0,593 | 0,003 | Gm15832   | ENSMUSG00000031431  | 0,532 | 0,013 | Tsc22d3       |
| ENSMUSG00000041438  | 0,593 | 0,000 | Utp4      | ENSMUSG00000034165  | 0,532 | 0,001 | Ccnd3         |
| ENSMUSG00000063506  | 0,592 | 0,003 | Arhgap22  | ENSMUSG00000034422  | 0,531 | 0,023 | Parp14        |
| ENSMUSG00000044768  | 0,592 | 0,000 | D1Ert622e | ENSMUSG00000044968  | 0,531 | 0,031 | Napepld       |
| ENSMUSG00000033099  | 0,591 | 0,006 | Nol12     | ENSMUSG000000112429 | 0,531 | 0,015 | AC131081.1    |
| ENSMUSG00000026159  | 0,590 | 0,000 | Agfg1     | ENSMUSG00000040511  | 0,531 | 0,002 | Pvr           |
| ENSMUSG00000031841  | 0,589 | 0,028 | Cdh13     | ENSMUSG00000079036  | 0,530 | 0,000 | Alkbh1        |
| ENSMUSG00000034321  | 0,589 | 0,000 | Exosc1    | ENSMUSG00000022255  | 0,529 | 0,005 | Mtdh          |
| ENSMUSG00000026974  | 0,589 | 0,000 | Zmynd19   | ENSMUSG00000026896  | 0,529 | 0,027 | Ifih1         |
| ENSMUSG00000048027  | 0,588 | 0,004 | Rgmb      | ENSMUSG00000018012  | 0,528 | 0,033 | Rac3          |
| ENSMUSG00000115219  | 0,587 | 0,004 | Eef1akmt4 | ENSMUSG00000035640  | 0,528 | 0,003 | Cbarp         |
| ENSMUSG00000054855  | 0,587 | 0,009 | Rnd1      | ENSMUSG00000023017  | 0,528 | 0,047 | Asic1         |
| ENSMUSG00000044231  | 0,587 | 0,000 | Nhlrc1    | ENSMUSG00000008318  | 0,527 | 0,008 | Relt          |
| ENSMUSG00000022792  | 0,585 | 0,000 | Yars2     | ENSMUSG00000020692  | 0,526 | 0,001 | Nle1          |
| ENSMUSG000000010358 | 0,585 | 0,012 | Ifi35     | ENSMUSG00000050295  | 0,524 | 0,035 | Foxc1         |
| ENSMUSG00000047260  | 0,585 | 0,000 | Emc6      | ENSMUSG00000020648  | 0,523 | 0,004 | Dus4l         |
| ENSMUSG00000044763  | 0,583 | 0,000 | Trmt10c   | ENSMUSG00000005374  | 0,523 | 0,000 | Tbl2          |
| ENSMUSG00000107176  | 0,582 | 0,009 | Gm9794    | ENSMUSG00000055065  | 0,522 | 0,000 | Ddx17         |
| ENSMUSG00000032575  | 0,582 | 0,000 | Manf      | ENSMUSG00000063480  | 0,522 | 0,000 | Snu13         |
| ENSMUSG00000032103  | 0,582 | 0,000 | Pus3      | ENSMUSG00000074873  | 0,522 | 0,021 | Al606181      |
| ENSMUSG00000074576  | 0,582 | 0,001 | Mocs3     | ENSMUSG00000039191  | 0,521 | 0,004 | Rbpj          |
| ENSMUSG000000091996 | 0,582 | 0,047 | BC049352  | ENSMUSG00000085894  | 0,521 | 0,017 | Gm15832       |
| ENSMUSG00000027722  | 0,582 | 0,000 | Spata5    | ENSMUSG00000031976  | 0,518 | 0,041 | Urb2          |
| ENSMUSG00000049241  | 0,581 | 0,033 | Hcar1     | ENSMUSG00000019194  | 0,518 | 0,039 | Scn1b         |
| ENSMUSG00000056121  | 0,580 | 0,000 | Fez2      | ENSMUSG00000024891  | 0,517 | 0,001 | Slc29a2       |
| ENSMUSG00000006941  | 0,580 | 0,000 | Eif1b     | ENSMUSG00000048027  | 0,516 | 0,021 | Rgmb          |
| ENSMUSG00000095464  | 0,579 | 0,041 | Gm21987   | ENSMUSG00000031604  | 0,513 | 0,000 | Msmo1         |
| ENSMUSG00000035828  | 0,577 | 0,001 | Pim3      | ENSMUSG00000003746  | 0,512 | 0,047 | Man1a         |
| ENSMUSG000000026970 | 0,576 | 0,001 | Rbms1     | ENSMUSG00000028060  | 0,512 | 0,005 | 2810403A07Rik |
| ENSMUSG00000028634  | 0,576 | 0,003 | Hivep3    | ENSMUSG00000044763  | 0,511 | 0,000 | Trmt10c       |
| ENSMUSG00000015766  | 0,576 | 0,026 | Eps8      | ENSMUSG00000005373  | 0,511 | 0,005 | Mlxipl        |
| ENSMUSG00000031024  | 0,576 | 0,000 | St5       | ENSMUSG00000035828  | 0,510 | 0,006 | Pim3          |



|                      |       |                     |                     |       |                |
|----------------------|-------|---------------------|---------------------|-------|----------------|
| ENSMUSG00000108732   | 0,575 | 0,028 2310043P16Rik | ENSMUSG00000021036  | 0,509 | 0,000 Sptlc2   |
| ENSMUSG000000021036  | 0,575 | 0,000 Sptlc2        | ENSMUSG000000022194 | 0,507 | 0,003 Pabpn1   |
| ENSMUSG000000037692  | 0,574 | 0,001 Ahdc1         | ENSMUSG000000035397 | 0,506 | 0,001 Klf16    |
| ENSMUSG000000021326  | 0,574 | 0,000 Trim27        | ENSMUSG000000063506 | 0,504 | 0,023 Arhgap22 |
| ENSMUSG000000025790  | 0,574 | 0,049 Slco3a1       | ENSMUSG000000059897 | 0,504 | 0,012 Zfp930   |
| ENSMUSG000000089989  | 0,574 | 0,031 Gm45713       | ENSMUSG000000022340 | 0,504 | 0,050 Sybu     |
| ENSMUSG000000045962  | 0,573 | 0,040 Wnk1          | ENSMUSG000000028339 | 0,504 | 0,043 Col15a1  |
| ENSMUSG000000024777  | 0,573 | 0,000 Ppp2r5b       | ENSMUSG000000002233 | 0,501 | 0,001 Rhoc     |
| ENSMUSG0000000045777 | 0,572 | 0,041 Ifitm10       | ENSMUSG000000031153 | 0,500 | 0,000 Gripap1  |
| ENSMUSG000000030888  | 0,571 | 0,000 Rrp8          | ENSMUSG000000045538 | 0,499 | 0,012 Ddx28    |
| ENSMUSG000000029344  | 0,570 | 0,000 Tpst2         | ENSMUSG000000026159 | 0,499 | 0,002 Agfg1    |
| ENSMUSG000000002885  | 0,569 | 0,006 Adgre5        | ENSMUSG000000043998 | 0,497 | 0,000 Mgat2    |
| ENSMUSG000000058126  | 0,569 | 0,031 Tpm3-rs7      | ENSMUSG000000060216 | 0,497 | 0,001 Arrb2    |
| ENSMUSG000000051495  | 0,569 | 0,000 Irf2bp2       | ENSMUSG000000026289 | 0,497 | 0,000 Atg16l1  |
| ENSMUSG000000110275  | 0,569 | 0,037 Gm5905        | ENSMUSG000000030545 | 0,495 | 0,000 Pex11a   |
| ENSMUSG0000000023106 | 0,568 | 0,002 Dnr           | ENSMUSG000000037242 | 0,495 | 0,022 Clic4    |
| ENSMUSG000000075585  | 0,568 | 0,001 6330403L08Rik | ENSMUSG000000090015 | 0,495 | 0,043 Gm15446  |
| ENSMUSG000000031146  | 0,567 | 0,019 Plp2          | ENSMUSG000000023272 | 0,493 | 0,002 Creld2   |
| ENSMUSG000000028540  | 0,567 | 0,000 Dph2          | ENSMUSG000000001467 | 0,493 | 0,004 Cyp51    |
| ENSMUSG000000074677  | 0,567 | 0,038 Sirpb1c       | ENSMUSG000000037573 | 0,492 | 0,042 Tob1     |
| ENSMUSG000000023067  | 0,566 | 0,013 Cdkn1a        | ENSMUSG000000053113 | 0,491 | 0,020 Socs3    |
| ENSMUSG000000074129  | 0,563 | 0,034 Rpl13a        | ENSMUSG000000029570 | 0,491 | 0,000 Lfng     |
| ENSMUSG0000000019487 | 0,563 | 0,000 Trip10        | ENSMUSG000000055491 | 0,490 | 0,000 Pprc1    |
| ENSMUSG000000039886  | 0,563 | 0,000 Tmem120a      | ENSMUSG000000063694 | 0,489 | 0,009 Cycs     |
| ENSMUSG000000026520  | 0,563 | 0,002 Pycr2         | ENSMUSG000000020248 | 0,487 | 0,000 Nfyb     |
| ENSMUSG000000058355  | 0,562 | 0,000 Abce1         | ENSMUSG000000021701 | 0,487 | 0,012 Plk2     |
| ENSMUSG000000036966  | 0,561 | 0,000 Spryd3        | ENSMUSG000000042719 | 0,485 | 0,030 Naa25    |
| ENSMUSG000000034587  | 0,561 | 0,001 8430429K09Rik | ENSMUSG000000049482 | 0,484 | 0,008 Ctut2    |
| ENSMUSG000000031976  | 0,561 | 0,017 Urb2          | ENSMUSG000000039176 | 0,482 | 0,000 Polg     |
| ENSMUSG0000000026596 | 0,561 | 0,046 Abl2          | ENSMUSG000000029708 | 0,481 | 0,042 Gcc1     |
| ENSMUSG000000022557  | 0,561 | 0,000 Bop1          | ENSMUSG000000003134 | 0,480 | 0,000 Tbc1d8   |
| ENSMUSG000000033545  | 0,560 | 0,000 Znr1          | ENSMUSG000000066152 | 0,480 | 0,000 Slc31a2  |
| ENSMUSG0000000032112 | 0,558 | 0,000 Trappc4       | ENSMUSG000000020527 | 0,479 | 0,000 Myo19    |
| ENSMUSG000000009293  | 0,556 | 0,000 Ube2g2        | ENSMUSG000000023068 | 0,478 | 0,000 Nus1     |
| ENSMUSG000000044533  | 0,556 | 0,025 Rps2          | ENSMUSG000000052253 | 0,477 | 0,029 Zfp622   |
| ENSMUSG000000002393  | 0,556 | 0,000 Nr2f6         | ENSMUSG000000025616 | 0,477 | 0,000 Usp16    |
| ENSMUSG0000000092035 | 0,554 | 0,045 Peg10         | ENSMUSG000000025602 | 0,476 | 0,021 Zfp202   |
| ENSMUSG000000031917  | 0,553 | 0,000 Nip7          | ENSMUSG000000024999 | 0,475 | 0,012 Noc3l    |
| ENSMUSG000000045128  | 0,553 | 0,033 Rpl18a        | ENSMUSG000000026121 | 0,475 | 0,002 Sema4c   |
| ENSMUSG000000036452  | 0,553 | 0,028 Arhgap26      | ENSMUSG000000028559 | 0,475 | 0,000 Osbpl9   |
| ENSMUSG000000048277  | 0,552 | 0,001 Syng2         | ENSMUSG000000054027 | 0,475 | 0,032 Nt5dc3   |
| ENSMUSG000000021930  | 0,552 | 0,000 Spryd7        | ENSMUSG000000026974 | 0,474 | 0,000 Zmynd19  |
| ENSMUSG000000046516  | 0,552 | 0,045 Cox17         | ENSMUSG000000043702 | 0,474 | 0,020 Pde12    |
| ENSMUSG0000000034709 | 0,552 | 0,000 Ppp1r21       | ENSMUSG000000029484 | 0,474 | 0,007 Anxa3    |
| ENSMUSG000000039191  | 0,551 | 0,001 Rbpj          | ENSMUSG000000020706 | 0,474 | 0,000 Ftsj3    |
| ENSMUSG000000058546  | 0,551 | 0,039 Rpl23a        | ENSMUSG000000022974 | 0,473 | 0,005 Paxbp1   |
| ENSMUSG000000078490  | 0,551 | 0,026 Cfap74        | ENSMUSG000000051451 | 0,473 | 0,004 Crebzf   |

|                      |       |                |                      |       |                     |
|----------------------|-------|----------------|----------------------|-------|---------------------|
| ENSMUSG00000040659   | 0,549 | 0,000 Efh2     | ENSMUSG00000003848   | 0,472 | 0,000 Nob1          |
| ENSMUSG000000020553  | 0,548 | 0,013 Pctp     | ENSMUSG00000018339   | 0,472 | 0,003 Gpx3          |
| ENSMUSG000000085385  | 0,548 | 0,006 Snhg17   | ENSMUSG000000056260  | 0,472 | 0,041 Lrif1         |
| ENSMUSG000000074892  | 0,547 | 0,006 B3galt5  | ENSMUSG000000022247  | 0,472 | 0,008 Brix1         |
| ENSMUSG000000084319  | 0,546 | 0,000 Tpt1-ps3 | ENSMUSG000000035047  | 0,471 | 0,000 Kri1          |
| ENSMUSG000000028645  | 0,545 | 0,001 Slc2a1   | ENSMUSG000000022792  | 0,471 | 0,001 Yars2         |
| ENSMUSG000000054079  | 0,545 | 0,000 Utp18    | ENSMUSG000000045294  | 0,470 | 0,047 Insig1        |
| ENSMUSG000000039640  | 0,544 | 0,024 Mrpl12   | ENSMUSG000000057329  | 0,469 | 0,033 Bcl2          |
| ENSMUSG000000024953  | 0,543 | 0,015 Prdx5    | ENSMUSG000000041025  | 0,469 | 0,000 Iffo2         |
| ENSMUSG000000018470  | 0,543 | 0,019 Kcnab3   | ENSMUSG000000023009  | 0,469 | 0,001 Nckap5l       |
| ENSMUSG000000027613  | 0,542 | 0,001 Eif6     | ENSMUSG000000048174  | 0,468 | 0,005 Tmem81        |
| ENSMUSG000000004771  | 0,541 | 0,000 Rab11a   | ENSMUSG000000024777  | 0,468 | 0,000 Ppp2r5b       |
| ENSMUSG000000105913  | 0,540 | 0,017 Mir5121  | ENSMUSG000000035649  | 0,467 | 0,001 Zcchc7        |
| ENSMUSG000000054000  | 0,539 | 0,030 Tusc1    | ENSMUSG000000016477  | 0,466 | 0,043 E2f3          |
| ENSMUSG000000031825  | 0,539 | 0,040 Crispld2 | ENSMUSG000000028952  | 0,466 | 0,005 Zbtb48        |
| ENSMUSG0000000027646 | 0,539 | 0,000 Src      | ENSMUSG000000043556  | 0,465 | 0,040 Fbxl7         |
| ENSMUSG000000098465  | 0,538 | 0,031 Mir1668  | ENSMUSG000000092232  | 0,464 | 0,001 Gm20521       |
| ENSMUSG000000038855  | 0,538 | 0,005 Itpkb    | ENSMUSG000000000555  | 0,464 | 0,013 Itga5         |
| ENSMUSG000000033931  | 0,536 | 0,000 Rbm34    | ENSMUSG000000025995  | 0,463 | 0,000 Wdr75         |
| ENSMUSG0000000022674 | 0,536 | 0,000 Ube2v2   | ENSMUSG000000021687  | 0,462 | 0,001 Scamp1        |
| ENSMUSG000000035640  | 0,536 | 0,002 Cbarp    | ENSMUSG000000027221  | 0,462 | 0,036 Chst1         |
| ENSMUSG000000029657  | 0,536 | 0,002 Hsph1    | ENSMUSG000000040296  | 0,462 | 0,032 Ddx58         |
| ENSMUSG0000000059277 | 0,536 | 0,013 R74862   | ENSMUSG000000025402  | 0,462 | 0,007 Nab2          |
| ENSMUSG000000047649  | 0,535 | 0,018 Cd3eap   | ENSMUSG000000064289  | 0,461 | 0,001 Tank          |
| ENSMUSG000000030291  | 0,535 | 0,036 Med21    | ENSMUSG000000034484  | 0,461 | 0,000 Snx2          |
| ENSMUSG000000062169  | 0,535 | 0,000 Cnih4    | ENSMUSG000000044224  | 0,461 | 0,000 Dnajc21       |
| ENSMUSG0000000032215 | 0,535 | 0,000 Rsl24d1  | ENSMUSG000000025436  | 0,461 | 0,008 Atp23         |
| ENSMUSG000000074622  | 0,535 | 0,000 Mafb     | ENSMUSG000000031799  | 0,460 | 0,000 Tpm4          |
| ENSMUSG000000042766  | 0,534 | 0,022 Trim46   | ENSMUSG000000029344  | 0,459 | 0,000 Tpst2         |
| ENSMUSG0000000034892 | 0,534 | 0,047 Rps29    | ENSMUSG0000000097440 | 0,457 | 0,041 Gm6277        |
| ENSMUSG000000049939  | 0,533 | 0,007 Lrrc4    | ENSMUSG000000031565  | 0,456 | 0,048 Fgfr1         |
| ENSMUSG000000047945  | 0,533 | 0,005 Marcks1  | ENSMUSG000000041506  | 0,455 | 0,007 Rrp9          |
| ENSMUSG000000052146  | 0,532 | 0,038 Rps10    | ENSMUSG000000058355  | 0,455 | 0,001 Abce1         |
| ENSMUSG0000000025762 | 0,530 | 0,000 Larp1b   | ENSMUSG000000047446  | 0,455 | 0,012 Arl4a         |
| ENSMUSG000000020692  | 0,529 | 0,001 Nle1     | ENSMUSG000000028540  | 0,451 | 0,000 Dph2          |
| ENSMUSG000000031897  | 0,529 | 0,031 Psmb10   | ENSMUSG000000032115  | 0,450 | 0,001 Hyou1         |
| ENSMUSG0000000020107 | 0,528 | 0,000 Anapc16  | ENSMUSG000000045140  | 0,450 | 0,035 Pigw          |
| ENSMUSG000000079037  | 0,528 | 0,006 Prnp     | ENSMUSG000000024037  | 0,450 | 0,000 Wdr4          |
| ENSMUSG000000018565  | 0,528 | 0,000 Elp5     | ENSMUSG000000021692  | 0,450 | 0,001 Dimt1         |
| ENSMUSG000000043445  | 0,527 | 0,001 Pgp      | ENSMUSG000000036634  | 0,449 | 0,046 Mag           |
| ENSMUSG0000000024661 | 0,527 | 0,014 Fth1     | ENSMUSG000000031839  | 0,448 | 0,014 Hsbp1         |
| ENSMUSG000000006301  | 0,527 | 0,000 Tmbim1   | ENSMUSG000000034587  | 0,448 | 0,016 8430429K09Rik |
| ENSMUSG000000025498  | 0,526 | 0,026 Irf7     | ENSMUSG000000014905  | 0,447 | 0,043 Dnajb9        |
| ENSMUSG0000000046768 | 0,525 | 0,024 Rhoj     | ENSMUSG000000026796  | 0,447 | 0,003 Fam129b       |
| ENSMUSG000000020397  | 0,524 | 0,000 Med7     | ENSMUSG000000020057  | 0,446 | 0,047 Dram1         |
| ENSMUSG000000020901  | 0,523 | 0,003 Pik3r5   | ENSMUSG000000083012  | 0,446 | 0,000 Fam220a       |
| ENSMUSG000000027787  | 0,522 | 0,000 Nmd3     | ENSMUSG000000039725  | 0,446 | 0,005 Trp53rka      |

|                      |       |                     |                     |       |                     |
|----------------------|-------|---------------------|---------------------|-------|---------------------|
| ENSMUSG00000027583   | 0,522 | 0,001 Zbtb46        | ENSMUSG00000033543  | 0,446 | 0,048 Gtf2a2        |
| ENSMUSG00000027351   | 0,521 | 0,014 Spred1        | ENSMUSG00000029504  | 0,445 | 0,000 Ddx51         |
| ENSMUSG00000067274   | 0,521 | 0,001 Rplp0         | ENSMUSG00000022489  | 0,445 | 0,004 Pde1b         |
| ENSMUSG00000029711   | 0,520 | 0,003 Epo           | ENSMUSG00000002325  | 0,445 | 0,000 Irf9          |
| ENSMUSG00000026959   | 0,519 | 0,050 Grin1         | ENSMUSG00000010048  | 0,443 | 0,005 Ifrd2         |
| ENSMUSG000000057497  | 0,518 | 0,000 Fam136a       | ENSMUSG00000070643  | 0,443 | 0,000 Sox13         |
| ENSMUSG000000097290  | 0,517 | 0,004 1300002E11Rik | ENSMUSG00000029415  | 0,441 | 0,041 Sdad1         |
| ENSMUSG00000047368   | 0,517 | 0,000 Abhd17b       | ENSMUSG00000028064  | 0,440 | 0,015 Sema4a        |
| ENSMUSG000000083064  | 0,517 | 0,029 Gm7785        | ENSMUSG00000004127  | 0,440 | 0,000 Trmt10a       |
| ENSMUSG00000008393   | 0,516 | 0,000 Carhsp1       | ENSMUSG000000052783 | 0,440 | 0,015 Grk4          |
| ENSMUSG00000039361   | 0,516 | 0,001 Picalm        | ENSMUSG00000027333  | 0,439 | 0,000 Smox          |
| ENSMUSG00000020706   | 0,516 | 0,000 Ftsj3         | ENSMUSG00000028907  | 0,439 | 0,002 Utp11         |
| ENSMUSG000000023791  | 0,515 | 0,000 Pigx          | ENSMUSG00000070462  | 0,439 | 0,000 Tlnrd1        |
| ENSMUSG000000065124  | 0,515 | 0,042 Snora65       | ENSMUSG00000071645  | 0,439 | 0,000 Tut1          |
| ENSMUSG000000034165  | 0,513 | 0,001 Ccnd3         | ENSMUSG00000027540  | 0,438 | 0,002 Ptpn1         |
| ENSMUSG000000012429  | 0,513 | 0,017 Mplkip        | ENSMUSG00000074480  | 0,438 | 0,017 Mex3a         |
| ENSMUSG00000044477   | 0,512 | 0,000 Zfand3        | ENSMUSG00000070972  | 0,436 | 0,001 Dnajc25       |
| ENSMUSG00000046711   | 0,512 | 0,009 Hmga1         | ENSMUSG00000050244  | 0,435 | 0,006 Heatr1        |
| ENSMUSG000000039208  | 0,511 | 0,006 Metrn1        | ENSMUSG00000074825  | 0,435 | 0,001 Itprip1       |
| ENSMUSG000000062619  | 0,511 | 0,043 2310039H08Rik | ENSMUSG00000026819  | 0,435 | 0,029 Slc25a25      |
| ENSMUSG000000024790  | 0,510 | 0,016 Sac3d1        | ENSMUSG00000034321  | 0,434 | 0,001 Exosc1        |
| ENSMUSG00000024429   | 0,510 | 0,001 Gnl1          | ENSMUSG000000050796 | 0,434 | 0,003 B3galt6       |
| ENSMUSG0000000031029 | 0,510 | 0,010 Eif3f         | ENSMUSG000000056917 | 0,432 | 0,000 Sipa1         |
| ENSMUSG000000024091  | 0,510 | 0,000 Vapa          | ENSMUSG00000049957  | 0,431 | 0,000 Ccdc137       |
| ENSMUSG000000032231  | 0,510 | 0,005 Anxa2         | ENSMUSG00000017057  | 0,430 | 0,038 Il13ra1       |
| ENSMUSG000000001467  | 0,509 | 0,002 Cyp51         | ENSMUSG00000025316  | 0,430 | 0,042 Banp          |
| ENSMUSG000000039470  | 0,508 | 0,001 Zdhhc2        | ENSMUSG00000035049  | 0,430 | 0,001 Rrp12         |
| ENSMUSG000000033909  | 0,508 | 0,000 Usp36         | ENSMUSG000000092541 | 0,429 | 0,002 Gm20537       |
| ENSMUSG000000104950  | 0,508 | 0,017 4833413G10Rik | ENSMUSG00000020009  | 0,428 | 0,000 Ifngr1        |
| ENSMUSG000000049307  | 0,507 | 0,006 Fut4          | ENSMUSG000000030681 | 0,427 | 0,005 Mvp           |
| ENSMUSG000000042719  | 0,506 | 0,015 Naa25         | ENSMUSG000000093485 | 0,426 | 0,036 Gm20708       |
| ENSMUSG000000022442  | 0,505 | 0,000 Ttll1         | ENSMUSG00000048100  | 0,425 | 0,023 Taf13         |
| ENSMUSG000000054676  | 0,505 | 0,000 1600014C10Rik | ENSMUSG000000037960 | 0,425 | 0,011 Card19        |
| ENSMUSG000000060579  | 0,505 | 0,027 Fhit          | ENSMUSG00000024330  | 0,425 | 0,045 Col11a2       |
| ENSMUSG000000061518  | 0,504 | 0,032 Cox5b         | ENSMUSG00000027787  | 0,422 | 0,000 Nmd3          |
| ENSMUSG00000029860   | 0,504 | 0,000 Zyx           | ENSMUSG000000092203 | 0,421 | 0,042 1110038B12Rik |
| ENSMUSG0000000049300 | 0,504 | 0,000 Prmt6         | ENSMUSG000000058392 | 0,421 | 0,000 Rrp1b         |
| ENSMUSG000000003746  | 0,502 | 0,038 Man1a         | ENSMUSG00000018932  | 0,421 | 0,018 Map2k3        |
| ENSMUSG000000060126  | 0,502 | 0,001 Tpt1          | ENSMUSG000000005483 | 0,420 | 0,000 Dnajb1        |
| ENSMUSG000000079677  | 0,502 | 0,040 Fdx1l         | ENSMUSG00000027804  | 0,419 | 0,000 Ppid          |
| ENSMUSG000000018932  | 0,502 | 0,002 Map2k3        | ENSMUSG000000054079 | 0,419 | 0,000 Utp18         |
| ENSMUSG000000025995  | 0,500 | 0,000 Wdr75         | ENSMUSG00000022119  | 0,419 | 0,008 Rbm26         |
| ENSMUSG000000026470  | 0,499 | 0,000 Stx6          | ENSMUSG00000030880  | 0,418 | 0,000 Polr3e        |
| ENSMUSG0000000090946 | 0,498 | 0,000 Ccdc71l       | ENSMUSG000000033931 | 0,418 | 0,000 Rbm34         |
| ENSMUSG000000045671  | 0,498 | 0,030 Spred2        | ENSMUSG00000024081  | 0,415 | 0,000 Cebpz         |
| ENSMUSG000000023286  | 0,497 | 0,001 Ube2j2        | ENSMUSG00000020932  | 0,415 | 0,023 Gfap          |
| ENSMUSG000000043284  | 0,497 | 0,005 Tmem11        | ENSMUSG00000109510  | 0,415 | 0,003 Gm42417       |

|                     |       |                     |                     |       |                     |
|---------------------|-------|---------------------|---------------------|-------|---------------------|
| ENSMUSG00000038214  | 0,497 | 0,016 Bend3         | ENSMUSG00000044231  | 0,414 | 0,021 Nhirc1        |
| ENSMUSG00000021024  | 0,497 | 0,012 Psma6         | ENSMUSG00000028034  | 0,414 | 0,035 Fubp1         |
| ENSMUSG00000002395  | 0,497 | 0,040 Use1          | ENSMUSG00000054676  | 0,412 | 0,007 1600014C10Rik |
| ENSMUSG00000046994  | 0,497 | 0,020 Mars2         | ENSMUSG00000019774  | 0,412 | 0,012 Mtrf1l        |
| ENSMUSG00000028559  | 0,496 | 0,000 Osbpl9        | ENSMUSG00000044768  | 0,412 | 0,001 D1Ertdd622e   |
| ENSMUSG00000040723  | 0,495 | 0,000 Rcsd1         | ENSMUSG00000027722  | 0,411 | 0,000 Spata5        |
| ENSMUSG00000056124  | 0,495 | 0,000 B4galt6       | ENSMUSG00000032010  | 0,411 | 0,005 Usp2          |
| ENSMUSG00000025477  | 0,494 | 0,000 Inpp5a        | ENSMUSG00000006301  | 0,410 | 0,001 Tmbim1        |
| ENSMUSG000000030880 | 0,493 | 0,000 Polr3e        | ENSMUSG00000022554  | 0,410 | 0,037 Hgh1          |
| ENSMUSG00000027746  | 0,492 | 0,000 Ufm1          | ENSMUSG00000110423  | 0,410 | 0,048 Gm45736       |
| ENSMUSG00000024436  | 0,491 | 0,001 Mrps18b       | ENSMUSG00000038930  | 0,410 | 0,007 Rccd1         |
| ENSMUSG00000012848  | 0,490 | 0,035 Rps5          | ENSMUSG00000045411  | 0,408 | 0,000 2410002F23Rik |
| ENSMUSG00000024456  | 0,490 | 0,000 Diaph1        | ENSMUSG00000028869  | 0,407 | 0,000 Gnl2          |
| ENSMUSG00000031652  | 0,490 | 0,000 N4bp1         | ENSMUSG00000068114  | 0,407 | 0,016 Ccdc134       |
| ENSMUSG00000033543  | 0,489 | 0,018 Gtf2a2        | ENSMUSG00000048787  | 0,407 | 0,030 Dcun1d3       |
| ENSMUSG000000022960 | 0,489 | 0,000 Donson        | ENSMUSG00000020424  | 0,407 | 0,049 Gatsl3        |
| ENSMUSG00000025967  | 0,489 | 0,023 Eef1b2        | ENSMUSG00000030888  | 0,406 | 0,001 Rrp8          |
| ENSMUSG00000039633  | 0,488 | 0,025 Lonrf1        | ENSMUSG00000001065  | 0,405 | 0,000 Zfp276        |
| ENSMUSG00000067367  | 0,488 | 0,019 Lyar          | ENSMUSG00000027865  | 0,404 | 0,002 Gdap2         |
| ENSMUSG00000056917  | 0,487 | 0,000 Sipa1         | ENSMUSG00000010067  | 0,404 | 0,027 Rassf1        |
| ENSMUSG00000032803  | 0,487 | 0,000 Cdv3          | ENSMUSG00000002733  | 0,404 | 0,010 Plekha3       |
| ENSMUSG00000074182  | 0,487 | 0,003 Znhit6        | ENSMUSG00000018143  | 0,403 | 0,010 Mafk          |
| ENSMUSG00000006589  | 0,487 | 0,045 Aprt          | ENSMUSG00000025422  | 0,402 | 0,017 Agap2         |
| ENSMUSG00000028898  | 0,485 | 0,025 Trnau1ap      | ENSMUSG00000021326  | 0,402 | 0,001 Trim27        |
| ENSMUSG00000109556  | 0,485 | 0,038 Gm38843       | ENSMUSG00000090946  | 0,402 | 0,008 Ccdc71l       |
| ENSMUSG00000006333  | 0,484 | 0,038 Rps9          | ENSMUSG00000070476  | 0,401 | 0,034 Fam217b       |
| ENSMUSG00000045140  | 0,484 | 0,014 Pigw          | ENSMUSG00000048277  | 0,399 | 0,027 Syngn2        |
| ENSMUSG00000067995  | 0,483 | 0,000 Gtf2f2        | ENSMUSG00000002625  | 0,399 | 0,007 Akap8l        |
| ENSMUSG00000062742  | 0,482 | 0,029 Gm5239        | ENSMUSG00000022463  | 0,398 | 0,041 Sreb2         |
| ENSMUSG000000054027 | 0,481 | 0,021 Nt5dc3        | ENSMUSG00000039474  | 0,397 | 0,004 Wfs1          |
| ENSMUSG00000026663  | 0,480 | 0,023 Atf6          | ENSMUSG00000031701  | 0,397 | 0,000 Dnaja2        |
| ENSMUSG00000085156  | 0,480 | 0,031 Snhg15        | ENSMUSG00000069844  | 0,396 | 0,003 Sco1          |
| ENSMUSG00000034484  | 0,480 | 0,000 Snx2          | ENSMUSG00000031511  | 0,396 | 0,003 Arhgef7       |
| ENSMUSG000000092203 | 0,480 | 0,012 1110038B12Rik | ENSMUSG00000004040  | 0,396 | 0,041 Stat3         |
| ENSMUSG000000097039 | 0,478 | 0,042 Pvt1          | ENSMUSG00000037752  | 0,395 | 0,002 Xkr8          |
| ENSMUSG00000020116  | 0,478 | 0,000 Pno1          | ENSMUSG00000022434  | 0,394 | 0,002 Fam118a       |
| ENSMUSG000000030744 | 0,477 | 0,024 Rps3          | ENSMUSG000000007476 | 0,394 | 0,000 Lrrc8a        |
| ENSMUSG00000002985  | 0,477 | 0,005 Apoe          | ENSMUSG00000044847  | 0,393 | 0,002 Lsm11         |
| ENSMUSG00000024248  | 0,477 | 0,036 Cox7a2l       | ENSMUSG00000028793  | 0,393 | 0,001 Rnf19b        |
| ENSMUSG00000031701  | 0,476 | 0,000 Dnaja2        | ENSMUSG00000024055  | 0,393 | 0,018 Cyp4f13       |
| ENSMUSG00000020009  | 0,475 | 0,000 Ifngr1        | ENSMUSG00000039242  | 0,392 | 0,016 B3galnt2      |
| ENSMUSG00000071415  | 0,475 | 0,047 Rpl23         | ENSMUSG00000020107  | 0,391 | 0,007 Anapc16       |
| ENSMUSG000000090137 | 0,474 | 0,036 Uba52         | ENSMUSG00000040010  | 0,391 | 0,032 Slc7a5        |
| ENSMUSG000000020255 | 0,474 | 0,000 D10Wsu102e    | ENSMUSG00000109243  | 0,391 | 0,000 Gm45867       |
| ENSMUSG00000014778  | 0,474 | 0,000 Fhod1         | ENSMUSG00000000881  | 0,390 | 0,000 Dlg3          |
| ENSMUSG00000028907  | 0,473 | 0,000 Utp11         | ENSMUSG00000036966  | 0,390 | 0,000 Spryd3        |
| ENSMUSG00000029415  | 0,473 | 0,018 Sdad1         | ENSMUSG00000020397  | 0,388 | 0,008 Med7          |



|                     |       |       |          |                     |       |       |            |
|---------------------|-------|-------|----------|---------------------|-------|-------|------------|
| ENSMUSG00000044715  | 0,471 | 0,000 | Gskip    | ENSMUSG00000023249  | 0,387 | 0,049 | Parp3      |
| ENSMUSG00000005481  | 0,470 | 0,000 | Ddx39    | ENSMUSG00000028410  | 0,387 | 0,002 | Dnaja1     |
| ENSMUSG00000036430  | 0,470 | 0,022 | Tbcc     | ENSMUSG00000001774  | 0,387 | 0,016 | Chordc1    |
| ENSMUSG00000031781  | 0,470 | 0,000 | Ciapi1   | ENSMUSG00000029860  | 0,387 | 0,005 | Zyx        |
| ENSMUSG00000041629  | 0,470 | 0,000 | Fam104a  | ENSMUSG00000023286  | 0,387 | 0,014 | Ube2j2     |
| ENSMUSG00000018293  | 0,469 | 0,010 | Pfn1     | ENSMUSG00000021930  | 0,386 | 0,000 | Spryd7     |
| ENSMUSG00000020057  | 0,469 | 0,023 | Dram1    | ENSMUSG00000055334  | 0,385 | 0,020 | Snupn      |
| ENSMUSG00000020424  | 0,469 | 0,013 | Gatsl3   | ENSMUSG00000004771  | 0,385 | 0,000 | Rab11a     |
| ENSMUSG000000037348 | 0,469 | 0,000 | Paqr7    | ENSMUSG00000001305  | 0,385 | 0,033 | Rrp15      |
| ENSMUSG00000024769  | 0,468 | 0,038 | Cdc42bpg | ENSMUSG00000025931  | 0,384 | 0,016 | Paqr8      |
| ENSMUSG00000026857  | 0,468 | 0,014 | Ntmt1    | ENSMUSG00000033106  | 0,384 | 0,001 | Slc7a6os   |
| ENSMUSG00000051346  | 0,468 | 0,000 | Spryd4   | ENSMUSG00000038213  | 0,383 | 0,000 | Tapbpl     |
| ENSMUSG000000036299 | 0,467 | 0,010 | BC031181 | ENSMUSG00000056121  | 0,381 | 0,000 | Fez2       |
| ENSMUSG00000027368  | 0,467 | 0,046 | Dusp2    | ENSMUSG00000027646  | 0,380 | 0,007 | Src        |
| ENSMUSG000000097440 | 0,467 | 0,026 | Gm6277   | ENSMUSG00000032309  | 0,380 | 0,000 | Fbxo22     |
| ENSMUSG000000091462 | 0,467 | 0,009 | Gm17084  | ENSMUSG000000103906 | 0,380 | 0,037 | Tigd5      |
| ENSMUSG00000039648  | 0,466 | 0,036 | Kyat1    | ENSMUSG00000063268  | 0,377 | 0,003 | Parp10     |
| ENSMUSG00000020250  | 0,466 | 0,000 | Txnrd1   | ENSMUSG00000036160  | 0,377 | 0,000 | Surf6      |
| ENSMUSG00000004530  | 0,466 | 0,000 | Coro1c   | ENSMUSG000000115293 | 0,375 | 0,004 | Ece2       |
| ENSMUSG00000022957  | 0,465 | 0,018 | Itns1    | ENSMUSG00000074182  | 0,375 | 0,046 | Znhit6     |
| ENSMUSG00000030057  | 0,464 | 0,000 | Cnbp     | ENSMUSG00000074030  | 0,375 | 0,013 | Exoc8      |
| ENSMUSG00000071078  | 0,463 | 0,017 | Nr2c2ap  | ENSMUSG00000039804  | 0,375 | 0,000 | Ncoa5      |
| ENSMUSG000000024818 | 0,463 | 0,001 | Slc25a45 | ENSMUSG00000039156  | 0,374 | 0,011 | Stim2      |
| ENSMUSG00000029610  | 0,463 | 0,016 | Aimp2    | ENSMUSG00000028653  | 0,374 | 0,000 | Trit1      |
| ENSMUSG00000043866  | 0,463 | 0,025 | Taf10    | ENSMUSG00000041264  | 0,374 | 0,000 | Uspl1      |
| ENSMUSG00000071180  | 0,463 | 0,000 | Smim15   | ENSMUSG00000054520  | 0,372 | 0,001 | Sh3bp2     |
| ENSMUSG00000071072  | 0,463 | 0,001 | Ptges3   | ENSMUSG00000030265  | 0,372 | 0,020 | Kras       |
| ENSMUSG00000053907  | 0,462 | 0,001 | Mat2a    | ENSMUSG00000033294  | 0,372 | 0,001 | Noc4l      |
| ENSMUSG00000029507  | 0,462 | 0,007 | Pus1     | ENSMUSG00000030232  | 0,371 | 0,000 | Aebp2      |
| ENSMUSG000000027405 | 0,461 | 0,000 | Nop56    | ENSMUSG00000031627  | 0,370 | 0,013 | Irf2       |
| ENSMUSG00000061477  | 0,461 | 0,028 | Rps7     | ENSMUSG000000114763 | 0,368 | 0,000 | AC134869.3 |
| ENSMUSG00000024037  | 0,460 | 0,000 | Wdr4     | ENSMUSG00000062169  | 0,367 | 0,000 | Cnih4      |
| ENSMUSG00000005514  | 0,460 | 0,000 | Por      | ENSMUSG00000031711  | 0,367 | 0,000 | Zfp330     |
| ENSMUSG00000042228  | 0,459 | 0,001 | Lyn      | ENSMUSG00000024188  | 0,366 | 0,000 | Luc7l      |
| ENSMUSG00000020248  | 0,457 | 0,000 | Nfyb     | ENSMUSG00000067995  | 0,366 | 0,002 | Gtf2f2     |
| ENSMUSG00000003429  | 0,457 | 0,041 | Rps11    | ENSMUSG00000000628  | 0,365 | 0,038 | Hk2        |
| ENSMUSG000000054520 | 0,457 | 0,000 | Sh3bp2   | ENSMUSG00000014907  | 0,364 | 0,012 | Naf1       |
| ENSMUSG00000030980  | 0,457 | 0,000 | Knop1    | ENSMUSG00000070871  | 0,364 | 0,003 | Ccnyl1     |
| ENSMUSG00000034265  | 0,457 | 0,013 | Zdhc14   | ENSMUSG00000038975  | 0,362 | 0,026 | Rabggtb    |
| ENSMUSG00000017756  | 0,457 | 0,045 | Slc12a7  | ENSMUSG00000025939  | 0,361 | 0,018 | Ube2w      |
| ENSMUSG00000070972  | 0,457 | 0,000 | Dnajc25  | ENSMUSG00000032497  | 0,361 | 0,000 | Lrrfip2    |
| ENSMUSG00000038034  | 0,456 | 0,040 | Igsf8    | ENSMUSG00000041354  | 0,361 | 0,003 | Rgl2       |
| ENSMUSG00000028710  | 0,456 | 0,002 | Atpaf1   | ENSMUSG00000032462  | 0,361 | 0,033 | Pik3cb     |
| ENSMUSG000000036992 | 0,456 | 0,014 | Nxt1     | ENSMUSG00000027215  | 0,360 | 0,005 | Cd82       |
| ENSMUSG00000022009  | 0,455 | 0,000 | Nufip1   | ENSMUSG00000002957  | 0,360 | 0,003 | Ap2a2      |
| ENSMUSG00000032834  | 0,455 | 0,000 | Pwp2     | ENSMUSG00000038578  | 0,359 | 0,020 | Susd1      |
| ENSMUSG00000028410  | 0,454 | 0,000 | Dnaja1   | ENSMUSG00000045216  | 0,358 | 0,044 | Hs6st1     |

|                     |       |                     |                    |       |                     |
|---------------------|-------|---------------------|--------------------|-------|---------------------|
| ENSMUSG00000024081  | 0,454 | 0,000 Cebpz         | ENSMUSG00000044792 | 0,357 | 0,035 Isca1         |
| ENSMUSG00000000555  | 0,453 | 0,012 Itga5         | ENSMUSG00000044636 | 0,356 | 0,037 Csrnp2        |
| ENSMUSG00000046058  | 0,453 | 0,023 Eid2          | ENSMUSG00000027091 | 0,356 | 0,000 Zc3h15        |
| ENSMUSG00000048174  | 0,452 | 0,003 Tmem81        | ENSMUSG00000026927 | 0,355 | 0,000 Sdccag3       |
| ENSMUSG00000054091  | 0,452 | 0,032 1810037117Rik | ENSMUSG00000037321 | 0,355 | 0,012 Tap1          |
| ENSMUSG000000021591 | 0,452 | 0,000 Glrx          | ENSMUSG00000029068 | 0,354 | 0,034 Ccnl2         |
| ENSMUSG00000025103  | 0,451 | 0,000 Btbd1         | ENSMUSG00000020250 | 0,354 | 0,014 Txnrd1        |
| ENSMUSG00000030681  | 0,451 | 0,002 Mvp           | ENSMUSG00000016181 | 0,353 | 0,002 Diexf         |
| ENSMUSG000000097059 | 0,450 | 0,008 Fam120aos     | ENSMUSG00000032803 | 0,353 | 0,000 Cdv3          |
| ENSMUSG000000083012 | 0,450 | 0,000 Fam220a       | ENSMUSG00000045980 | 0,352 | 0,005 Tmem104       |
| ENSMUSG00000026749  | 0,449 | 0,000 Nek6          | ENSMUSG00000030057 | 0,352 | 0,004 Cnbp          |
| ENSMUSG00000050777  | 0,449 | 0,019 Tmem37        | ENSMUSG00000042133 | 0,351 | 0,003 Ppig          |
| ENSMUSG00000042190  | 0,448 | 0,036 Cmk1r1        | ENSMUSG00000074102 | 0,351 | 0,004 Rbm15b        |
| ENSMUSG00000032220  | 0,448 | 0,030 Myo1e         | ENSMUSG00000002147 | 0,351 | 0,002 Stat6         |
| ENSMUSG00000028416  | 0,448 | 0,032 Bag1          | ENSMUSG00000029924 | 0,350 | 0,010 Slc37a3       |
| ENSMUSG000000044709 | 0,447 | 0,029 Gemin7        | ENSMUSG00000031781 | 0,349 | 0,001 Ciapin1       |
| ENSMUSG00000029390  | 0,447 | 0,032 Tmed2         | ENSMUSG00000022575 | 0,349 | 0,011 Gsdmd         |
| ENSMUSG00000049686  | 0,445 | 0,000 Orai1         | ENSMUSG00000036873 | 0,349 | 0,013 2410004B18Rik |
| ENSMUSG00000019868  | 0,445 | 0,000 Vta1          | ENSMUSG00000047098 | 0,348 | 0,000 Rnf31         |
| ENSMUSG00000029581  | 0,445 | 0,000 Fscn1         | ENSMUSG00000024592 | 0,348 | 0,019 C330018D20Rik |
| ENSMUSG00000038683  | 0,443 | 0,000 Pak1ip1       | ENSMUSG00000032575 | 0,346 | 0,036 Manf          |
| ENSMUSG00000028683  | 0,443 | 0,002 Eif2b3        | ENSMUSG00000028889 | 0,346 | 0,001 Yrdc          |
| ENSMUSG000000044149 | 0,443 | 0,002 Nkrf          | ENSMUSG00000036693 | 0,345 | 0,000 Nop14         |
| ENSMUSG00000015656  | 0,443 | 0,004 Hspa8         | ENSMUSG00000024436 | 0,344 | 0,035 Mrps18b       |
| ENSMUSG00000016554  | 0,442 | 0,000 Eif3d         | ENSMUSG00000068742 | 0,344 | 0,025 Cry2          |
| ENSMUSG00000037242  | 0,442 | 0,035 Clic4         | ENSMUSG00000024456 | 0,343 | 0,009 Diaph1        |
| ENSMUSG00000008859  | 0,442 | 0,000 Rala          | ENSMUSG00000033285 | 0,342 | 0,001 Wdr3          |
| ENSMUSG00000037563  | 0,442 | 0,049 Rps16         | ENSMUSG00000059970 | 0,341 | 0,042 Hspa2         |
| ENSMUSG00000020087  | 0,441 | 0,000 Tysnd1        | ENSMUSG00000032285 | 0,341 | 0,001 Dnaja4        |
| ENSMUSG000000022639 | 0,440 | 0,002 Dubr          | ENSMUSG00000025171 | 0,341 | 0,034 Ubtd1         |
| ENSMUSG00000021018  | 0,440 | 0,043 Polr2h        | ENSMUSG00000024818 | 0,341 | 0,033 Slc25a45      |
| ENSMUSG00000027091  | 0,440 | 0,000 Zc3h15        | ENSMUSG00000028896 | 0,341 | 0,044 Rcc1          |
| ENSMUSG00000041025  | 0,440 | 0,000 Iffo2         | ENSMUSG00000001248 | 0,341 | 0,004 Gramd1a       |
| ENSMUSG000000038467 | 0,439 | 0,000 Chmp4b        | ENSMUSG00000071180 | 0,341 | 0,002 Smim15        |
| ENSMUSG00000038412  | 0,439 | 0,006 Higd1a        | ENSMUSG00000023791 | 0,340 | 0,022 Pigx          |
| ENSMUSG00000078713  | 0,438 | 0,033 Tomm5         | ENSMUSG00000021501 | 0,339 | 0,000 Caml          |
| ENSMUSG000000042684 | 0,438 | 0,033 Npl           | ENSMUSG00000041707 | 0,339 | 0,010 1810011H11Rik |
| ENSMUSG00000069844  | 0,438 | 0,000 Sco1          | ENSMUSG00000045576 | 0,338 | 0,002 St7l          |
| ENSMUSG00000054766  | 0,438 | 0,000 Set           | ENSMUSG00000030980 | 0,337 | 0,002 Knop1         |
| ENSMUSG00000018217  | 0,438 | 0,002 Pmp22         | ENSMUSG00000031878 | 0,337 | 0,002 Nae1          |
| ENSMUSG00000039680  | 0,438 | 0,021 Mrps6         | ENSMUSG00000071072 | 0,337 | 0,034 Ptges3        |
| ENSMUSG00000075701  | 0,437 | 0,000 Selenos       | ENSMUSG00000031652 | 0,337 | 0,035 N4bp1         |
| ENSMUSG00000049957  | 0,435 | 0,000 Ccdc137       | ENSMUSG00000061458 | 0,337 | 0,000 Nol10         |
| ENSMUSG000000017404 | 0,435 | 0,047 Rpl19         | ENSMUSG00000021591 | 0,336 | 0,018 Glrx          |
| ENSMUSG00000033434  | 0,435 | 0,041 Gtppb6        | ENSMUSG00000024091 | 0,336 | 0,006 Vapa          |
| ENSMUSG00000049396  | 0,435 | 0,001 Gemin4        | ENSMUSG00000027422 | 0,336 | 0,000 Rrbp1         |
| ENSMUSG00000036398  | 0,434 | 0,031 Ppp1r11       | ENSMUSG00000024613 | 0,335 | 0,001 Tcof1         |

|                     |       |                     |                    |       |                     |
|---------------------|-------|---------------------|--------------------|-------|---------------------|
| ENSMUSG00000030265  | 0,434 | 0,003 Kras          | ENSMUSG00000025103 | 0,335 | 0,000 Btbd1         |
| ENSMUSG00000010047  | 0,433 | 0,000 Hyal2         | ENSMUSG00000074656 | 0,334 | 0,001 Eif2s2        |
| ENSMUSG00000013701  | 0,433 | 0,000 Timm23        | ENSMUSG00000066735 | 0,334 | 0,021 Vkorc1l1      |
| ENSMUSG00000029484  | 0,432 | 0,012 Anxa3         | ENSMUSG00000028710 | 0,333 | 0,049 Atpaf1        |
| ENSMUSG00000055553  | 0,432 | 0,046 Kxd1          | ENSMUSG00000072258 | 0,333 | 0,037 Taf1a         |
| ENSMUSG00000028988  | 0,430 | 0,002 Ctnnbip1      | ENSMUSG00000030619 | 0,332 | 0,005 Eed           |
| ENSMUSG00000066152  | 0,430 | 0,001 Slc31a2       | ENSMUSG00000027510 | 0,331 | 0,029 Rbm38         |
| ENSMUSG00000036160  | 0,429 | 0,000 Surf6         | ENSMUSG00000059288 | 0,331 | 0,036 Cdyl          |
| ENSMUSG00000019188  | 0,429 | 0,000 H13           | ENSMUSG00000037251 | 0,331 | 0,000 Pomk          |
| ENSMUSG00000032010  | 0,429 | 0,002 Usp2          | ENSMUSG00000005481 | 0,331 | 0,030 Ddx39         |
| ENSMUSG00000051256  | 0,427 | 0,001 Jagn1         | ENSMUSG00000061689 | 0,329 | 0,000 Dlgap4        |
| ENSMUSG00000039804  | 0,427 | 0,000 Ncoa5         | ENSMUSG00000050821 | 0,326 | 0,029 Fam131a       |
| ENSMUSG00000032463  | 0,427 | 0,001 Faim          | ENSMUSG00000020282 | 0,326 | 0,004 Rhbdf1        |
| ENSMUSG00000057134  | 0,426 | 0,000 Ado           | ENSMUSG00000008393 | 0,325 | 0,014 Carhsp1       |
| ENSMUSG00000095597  | 0,425 | 0,020 Gm6472        | ENSMUSG00000020361 | 0,324 | 0,000 Hspa4         |
| ENSMUSG000000028670 | 0,425 | 0,004 Lyp1a2        | ENSMUSG00000020076 | 0,324 | 0,000 Ddx50         |
| ENSMUSG00000059714  | 0,424 | 0,011 Flot1         | ENSMUSG00000024513 | 0,324 | 0,013 Mbd2          |
| ENSMUSG00000048234  | 0,423 | 0,001 Rnf149        | ENSMUSG00000048234 | 0,322 | 0,029 Rnf149        |
| ENSMUSG00000018559  | 0,423 | 0,001 Ctdnep1       | ENSMUSG00000020680 | 0,322 | 0,000 Taf15         |
| ENSMUSG00000024539  | 0,423 | 0,000 Ptpn2         | ENSMUSG00000040025 | 0,322 | 0,001 Ythdf2        |
| ENSMUSG00000033192  | 0,422 | 0,004 Lpcat2        | ENSMUSG00000073771 | 0,321 | 0,049 Btbd19        |
| ENSMUSG00000036560  | 0,422 | 0,047 Lgi4          | ENSMUSG00000054766 | 0,321 | 0,002 Set           |
| ENSMUSG00000070319  | 0,422 | 0,018 Eif3g         | ENSMUSG00000032834 | 0,321 | 0,001 Pwp2          |
| ENSMUSG00000064289  | 0,421 | 0,003 Tank          | ENSMUSG00000028194 | 0,320 | 0,019 Ddah1         |
| ENSMUSG00000020708  | 0,421 | 0,028 Psmc5         | ENSMUSG00000028042 | 0,320 | 0,016 Zbtb7b        |
| ENSMUSG00000007836  | 0,419 | 0,000 Hnrmpa0       | ENSMUSG00000034575 | 0,320 | 0,013 Papd7         |
| ENSMUSG00000037251  | 0,419 | 0,000 Pomk          | ENSMUSG00000017999 | 0,319 | 0,000 Ddx27         |
| ENSMUSG00000033499  | 0,419 | 0,000 Larp4b        | ENSMUSG00000026519 | 0,319 | 0,031 Tmem63a       |
| ENSMUSG00000021458  | 0,418 | 0,006 201011101Rik  | ENSMUSG00000025880 | 0,318 | 0,046 Smad7         |
| ENSMUSG00000029014  | 0,418 | 0,001 Dnajc2        | ENSMUSG00000018583 | 0,318 | 0,000 G3bp1         |
| ENSMUSG00000079036  | 0,417 | 0,000 Alkbh1        | ENSMUSG00000019814 | 0,318 | 0,002 Ltv1          |
| ENSMUSG00000091811  | 0,417 | 0,049 Inafm1        | ENSMUSG00000023044 | 0,318 | 0,000 Csad          |
| ENSMUSG00000060860  | 0,417 | 0,042 Ube2s         | ENSMUSG00000034252 | 0,318 | 0,000 Senp6         |
| ENSMUSG00000058558  | 0,417 | 0,041 Rpl5          | ENSMUSG00000041130 | 0,317 | 0,000 Zfp598        |
| ENSMUSG00000054321  | 0,416 | 0,032 Taf4b         | ENSMUSG00000059866 | 0,317 | 0,022 Tnip2         |
| ENSMUSG00000038539  | 0,416 | 0,012 Atf5          | ENSMUSG00000001833 | 0,317 | 0,043 Sept7         |
| ENSMUSG00000029504  | 0,416 | 0,000 Ddx51         | ENSMUSG00000029063 | 0,317 | 0,002 Nadk          |
| ENSMUSG00000034974  | 0,415 | 0,017 Dapk3         | ENSMUSG00000050846 | 0,316 | 0,035 Zfp623        |
| ENSMUSG00000048486  | 0,415 | 0,000 Fitm2         | ENSMUSG00000024287 | 0,316 | 0,041 Thoc1         |
| ENSMUSG00000032115  | 0,414 | 0,003 Hyou1         | ENSMUSG00000039159 | 0,316 | 0,000 Ube2h         |
| ENSMUSG00000014859  | 0,414 | 0,000 E2f4          | ENSMUSG00000042208 | 0,315 | 0,041 0610010F05Rik |
| ENSMUSG00000090996  | 0,412 | 0,011 Gm20458       | ENSMUSG00000036934 | 0,315 | 0,015 4921524J17Rik |
| ENSMUSG00000020133  | 0,412 | 0,008 2310011J03Rik | ENSMUSG00000058503 | 0,314 | 0,000 Fam133b       |
| ENSMUSG00000044792  | 0,412 | 0,008 Isca1         | ENSMUSG00000022257 | 0,314 | 0,005 Laptm4b       |
| ENSMUSG00000024725  | 0,411 | 0,010 Ostf1         | ENSMUSG00000024045 | 0,313 | 0,002 Akap8         |
| ENSMUSG00000087589  | 0,411 | 0,042 D430040D24Rik | ENSMUSG00000061950 | 0,313 | 0,013 Ppp4r1        |
| ENSMUSG00000004040  | 0,410 | 0,024 Stat3         | ENSMUSG00000026341 | 0,313 | 0,017 Actr3         |

|                      |       |                     |                     |       |                     |
|----------------------|-------|---------------------|---------------------|-------|---------------------|
| ENSMUSG00000030019   | 0,410 | 0,001 Fbxl14        | ENSMUSG00000005514  | 0,312 | 0,001 Por           |
| ENSMUSG000000022752  | 0,410 | 0,000 Tomm70a       | ENSMUSG000000032215 | 0,311 | 0,031 Rsl24d1       |
| ENSMUSG000000046731  | 0,409 | 0,008 Kctd11        | ENSMUSG000000025477 | 0,310 | 0,001 Inpp5a        |
| ENSMUSG00000004665   | 0,409 | 0,017 Cnn2          | ENSMUSG00000009535  | 0,310 | 0,000 Rnmt          |
| ENSMUSG000000010048  | 0,408 | 0,007 Ifrd2         | ENSMUSG000000026806 | 0,310 | 0,004 Ddx31         |
| ENSMUSG000000020935  | 0,408 | 0,000 Dcakd         | ENSMUSG000000036054 | 0,310 | 0,001 Sugp2         |
| ENSMUSG000000031320  | 0,408 | 0,033 Rps4x         | ENSMUSG000000002845 | 0,309 | 0,010 Tmem39a       |
| ENSMUSG000000044496  | 0,408 | 0,000 2510039O18Rik | ENSMUSG000000009293 | 0,309 | 0,001 Ube2g2        |
| ENSMUSG000000056076  | 0,408 | 0,000 Eif3b         | ENSMUSG000000049232 | 0,308 | 0,034 Tigd2         |
| ENSMUSG000000074247  | 0,407 | 0,001 Dda1          | ENSMUSG000000024966 | 0,308 | 0,003 Stip1         |
| ENSMUSG000000024513  | 0,407 | 0,001 Mbd2          | ENSMUSG000000038517 | 0,307 | 0,001 Tbkbp1        |
| ENSMUSG000000002957  | 0,407 | 0,000 Ap2a2         | ENSMUSG000000020246 | 0,307 | 0,041 Hcfc2         |
| ENSMUSG000000031513  | 0,407 | 0,000 Leprotl1      | ENSMUSG000000019082 | 0,307 | 0,012 Slc25a22      |
| ENSMUSG000000022257  | 0,406 | 0,000 Laptm4b       | ENSMUSG000000107881 | 0,305 | 0,045 Gm44250       |
| ENSMUSG000000002733  | 0,406 | 0,007 Plekha3       | ENSMUSG000000055239 | 0,305 | 0,000 Kcmf1         |
| ENSMUSG0000000074102 | 0,406 | 0,000 Rbm15b        | ENSMUSG000000032423 | 0,304 | 0,018 Syncrip       |
| ENSMUSG000000030879  | 0,405 | 0,011 Mrpl17        | ENSMUSG000000041459 | 0,304 | 0,006 Tardbp        |
| ENSMUSG000000055334  | 0,405 | 0,009 Snupn         | ENSMUSG000000028156 | 0,303 | 0,002 Eif4e         |
| ENSMUSG000000033918  | 0,403 | 0,005 Parl          | ENSMUSG000000022498 | 0,303 | 0,000 Txndc11       |
| ENSMUSG0000000024613 | 0,403 | 0,000 Tcof1         | ENSMUSG000000038507 | 0,303 | 0,033 Parp12        |
| ENSMUSG000000035047  | 0,403 | 0,001 Kri1          | ENSMUSG000000030942 | 0,302 | 0,000 Thumpd1       |
| ENSMUSG000000020358  | 0,403 | 0,002 Hnrnpab       | ENSMUSG000000026864 | 0,302 | 0,006 Hspa5         |
| ENSMUSG0000000028194 | 0,403 | 0,001 Ddah1         | ENSMUSG000000025138 | 0,301 | 0,034 Sirt7         |
| ENSMUSG000000026203  | 0,402 | 0,001 Dnajb2        | ENSMUSG000000000532 | 0,300 | 0,049 Acvr1b        |
| ENSMUSG000000067212  | 0,402 | 0,023 H2-T23        | ENSMUSG000000045248 | 0,300 | 0,009 Med26         |
| ENSMUSG000000004460  | 0,402 | 0,000 Dnajb11       | ENSMUSG000000039630 | 0,300 | 0,000 Hnrnpu        |
| ENSMUSG000000046722  | 0,402 | 0,000 Cdc42se1      | ENSMUSG000000045624 | 0,299 | 0,018 Esf1          |
| ENSMUSG000000025792  | 0,401 | 0,001 Slc25a10      | ENSMUSG000000021392 | 0,299 | 0,026 Nol8          |
| ENSMUSG000000055491  | 0,401 | 0,001 Pprc1         | ENSMUSG000000008859 | 0,299 | 0,001 Rala          |
| ENSMUSG0000000024966 | 0,401 | 0,000 Stip1         | ENSMUSG000000051391 | 0,298 | 0,035 Ywhag         |
| ENSMUSG000000039067  | 0,400 | 0,002 Psmd7         | ENSMUSG000000010047 | 0,298 | 0,004 Hyal2         |
| ENSMUSG000000032309  | 0,400 | 0,000 Fbxo22        | ENSMUSG000000032307 | 0,297 | 0,012 Ube2q2        |
| ENSMUSG000000045980  | 0,399 | 0,001 Tmem104       | ENSMUSG000000021938 | 0,297 | 0,040 Pspc1         |
| ENSMUSG0000000024785 | 0,399 | 0,002 Rcl1          | ENSMUSG000000037348 | 0,296 | 0,007 Paqr7         |
| ENSMUSG000000016181  | 0,399 | 0,000 Diexf         | ENSMUSG000000022442 | 0,294 | 0,016 Tll1          |
| ENSMUSG000000037805  | 0,398 | 0,047 Rpl10a        | ENSMUSG000000024219 | 0,293 | 0,017 Anks1         |
| ENSMUSG0000000022463 | 0,398 | 0,029 Srebfl2       | ENSMUSG000000014859 | 0,293 | 0,000 E2f4          |
| ENSMUSG000000020955  | 0,398 | 0,049 Ap4s1         | ENSMUSG000000023007 | 0,293 | 0,034 Prpf40b       |
| ENSMUSG000000041012  | 0,398 | 0,015 Cmtm8         | ENSMUSG000000019302 | 0,292 | 0,001 Atp6v0a1      |
| ENSMUSG000000074030  | 0,398 | 0,004 Exoc8         | ENSMUSG000000014177 | 0,292 | 0,006 Tvp23b        |
| ENSMUSG000000038387  | 0,397 | 0,040 Rras          | ENSMUSG000000074781 | 0,291 | 0,010 Ube2n         |
| ENSMUSG000000020648  | 0,397 | 0,022 Dus4l         | ENSMUSG000000044477 | 0,291 | 0,000 Zfand3        |
| ENSMUSG000000030224  | 0,397 | 0,000 Strap         | ENSMUSG000000030533 | 0,290 | 0,039 Unc45a        |
| ENSMUSG0000000001416 | 0,396 | 0,005 Cct3          | ENSMUSG000000039294 | 0,287 | 0,004 BC017643      |
| ENSMUSG000000039159  | 0,396 | 0,000 Ube2h         | ENSMUSG000000050088 | 0,287 | 0,001 1600012H06Rik |
| ENSMUSG000000025316  | 0,396 | 0,049 Banp          | ENSMUSG000000011958 | 0,287 | 0,000 Bnip2         |
| ENSMUSG000000074656  | 0,396 | 0,000 Eif2s2        | ENSMUSG000000010453 | 0,287 | 0,013 Kansl3        |



|                     |       |                     |                    |       |                     |
|---------------------|-------|---------------------|--------------------|-------|---------------------|
| ENSMUSG00000039244  | 0,396 | 0,000 E130309D02Rik | ENSMUSG00000019927 | 0,286 | 0,001 Ube2d1        |
| ENSMUSG00000078427  | 0,396 | 0,011 Sarnp         | ENSMUSG00000002017 | 0,286 | 0,016 Fam98a        |
| ENSMUSG00000020644  | 0,395 | 0,026 Id2           | ENSMUSG00000022752 | 0,286 | 0,018 Tomm70a       |
| ENSMUSG00000039156  | 0,395 | 0,004 Stim2         | ENSMUSG00000049300 | 0,286 | 0,011 Prmt6         |
| ENSMUSG00000095567  | 0,395 | 0,000 Noc2l         | ENSMUSG00000026470 | 0,286 | 0,000 Stx6          |
| ENSMUSG00000036873  | 0,394 | 0,003 2410004B18Rik | ENSMUSG00000038683 | 0,285 | 0,031 Pak1ip1       |
| ENSMUSG00000018040  | 0,393 | 0,000 Rrp7a         | ENSMUSG00000029071 | 0,285 | 0,003 Dvl1          |
| ENSMUSG00000066735  | 0,392 | 0,003 Vkorc111      | ENSMUSG00000041426 | 0,285 | 0,015 Hibch         |
| ENSMUSG000000034201 | 0,391 | 0,000 Gas2l1        | ENSMUSG00000078786 | 0,284 | 0,047 BC024978      |
| ENSMUSG00000092310  | 0,391 | 0,049 Gm20509       | ENSMUSG00000036707 | 0,284 | 0,009 Cab39         |
| ENSMUSG00000092541  | 0,390 | 0,005 Gm20537       | ENSMUSG00000025337 | 0,283 | 0,017 Sbds          |
| ENSMUSG00000026121  | 0,390 | 0,010 Sema4c        | ENSMUSG00000038612 | 0,282 | 0,012 Mcl1          |
| ENSMUSG00000030199  | 0,390 | 0,014 Etv6          | ENSMUSG00000026283 | 0,281 | 0,043 Ing5          |
| ENSMUSG00000018433  | 0,388 | 0,000 Nol11         | ENSMUSG00000021428 | 0,280 | 0,000 Riok1         |
| ENSMUSG00000022517  | 0,388 | 0,000 Mgrn1         | ENSMUSG00000041629 | 0,280 | 0,037 Fam104a       |
| ENSMUSG000000028609 | 0,388 | 0,036 Magoh         | ENSMUSG00000091896 | 0,279 | 0,002 Ube2d2a       |
| ENSMUSG00000029924  | 0,387 | 0,002 Slc37a3       | ENSMUSG00000053253 | 0,279 | 0,026 Ndfip2        |
| ENSMUSG00000027475  | 0,387 | 0,010 Kif3b         | ENSMUSG00000024150 | 0,278 | 0,001 Mcfd2         |
| ENSMUSG00000032078  | 0,387 | 0,018 Zpr1          | ENSMUSG00000068798 | 0,278 | 0,004 Rap1a         |
| ENSMUSG00000040482  | 0,386 | 0,018 Dxo           | ENSMUSG00000024539 | 0,278 | 0,043 Ptpn2         |
| ENSMUSG00000059897  | 0,386 | 0,046 Zfp930        | ENSMUSG00000009630 | 0,278 | 0,000 Ppp2cb        |
| ENSMUSG00000029066  | 0,385 | 0,032 Mrpl20        | ENSMUSG00000022855 | 0,277 | 0,001 Senp2         |
| ENSMUSG000000103906 | 0,385 | 0,018 Tigd5         | ENSMUSG00000032557 | 0,277 | 0,000 Uba5          |
| ENSMUSG00000064267  | 0,385 | 0,042 Hvcn1         | ENSMUSG00000033499 | 0,276 | 0,001 Larp4b        |
| ENSMUSG00000067722  | 0,385 | 0,015 BC003965      | ENSMUSG00000036737 | 0,276 | 0,005 Oxsr1         |
| ENSMUSG00000078652  | 0,385 | 0,000 Psme3         | ENSMUSG00000021116 | 0,275 | 0,002 Eif2s1        |
| ENSMUSG00000029063  | 0,385 | 0,000 Nadk          | ENSMUSG00000047866 | 0,274 | 0,000 Lonp2         |
| ENSMUSG00000071379  | 0,385 | 0,007 Hpcal1        | ENSMUSG00000030400 | 0,274 | 0,000 Ercc2         |
| ENSMUSG00000006818  | 0,385 | 0,003 Sod2          | ENSMUSG00000075701 | 0,274 | 0,047 Selenos       |
| ENSMUSG000000017781 | 0,384 | 0,000 Pitpna        | ENSMUSG00000033953 | 0,273 | 0,007 Ppp3r1        |
| ENSMUSG00000029246  | 0,383 | 0,004 Ppat          | ENSMUSG00000063785 | 0,272 | 0,002 Utp14a        |
| ENSMUSG00000025236  | 0,383 | 0,001 Adpgk         | ENSMUSG00000025024 | 0,271 | 0,002 Smndc1        |
| ENSMUSG00000049091  | 0,383 | 0,002 Sephs2        | ENSMUSG00000018433 | 0,271 | 0,001 Nol11         |
| ENSMUSG00000017734  | 0,382 | 0,016 Dbndd2        | ENSMUSG00000030224 | 0,270 | 0,000 Strap         |
| ENSMUSG00000030545  | 0,382 | 0,006 Pex11a        | ENSMUSG00000009566 | 0,270 | 0,004 Fpgs          |
| ENSMUSG00000017747  | 0,382 | 0,000 Ghdc          | ENSMUSG00000073639 | 0,270 | 0,045 Rab18         |
| ENSMUSG00000014402  | 0,382 | 0,018 Tsg101        | ENSMUSG00000032745 | 0,269 | 0,002 Gbbp1         |
| ENSMUSG00000060708  | 0,381 | 0,039 Bloc1s4       | ENSMUSG00000045598 | 0,269 | 0,050 Zfp553        |
| ENSMUSG00000029145  | 0,381 | 0,019 Eif2b4        | ENSMUSG00000034595 | 0,266 | 0,024 Ppp1r18       |
| ENSMUSG00000032280  | 0,381 | 0,011 Tle3          | ENSMUSG00000078652 | 0,266 | 0,000 Psme3         |
| ENSMUSG00000032119  | 0,380 | 0,035 Hinfp         | ENSMUSG00000053289 | 0,265 | 0,007 Ddx10         |
| ENSMUSG00000042354  | 0,380 | 0,006 Gnl3          | ENSMUSG00000030036 | 0,265 | 0,029 Mogs          |
| ENSMUSG00000033953  | 0,379 | 0,000 Ppp3r1        | ENSMUSG00000037965 | 0,264 | 0,024 Zc3h7a        |
| ENSMUSG000000097729 | 0,379 | 0,034 2310015A10Rik | ENSMUSG00000059939 | 0,264 | 0,003 9430015G10Rik |
| ENSMUSG00000010054  | 0,378 | 0,001 Tusc2         | ENSMUSG00000089917 | 0,264 | 0,012 Uckl1         |
| ENSMUSG00000020561  | 0,378 | 0,014 Twistnb       | ENSMUSG00000030847 | 0,262 | 0,041 Bag3          |
| ENSMUSG00000041645  | 0,377 | 0,000 Ddx24         | ENSMUSG00000020530 | 0,261 | 0,005 Ggnbp2        |

|                     |       |                |                    |       |                     |
|---------------------|-------|----------------|--------------------|-------|---------------------|
| ENSMUSG00000021116  | 0,377 | 0,000 Eif2s1   | ENSMUSG00000032212 | 0,261 | 0,002 Sltm          |
| ENSMUSG00000045211  | 0,377 | 0,003 Nudt18   | ENSMUSG00000019254 | 0,260 | 0,031 Ppp1r12c      |
| ENSMUSG00000026341  | 0,377 | 0,002 Actr3    | ENSMUSG00000024862 | 0,260 | 0,007 Klc2          |
| ENSMUSG00000033685  | 0,377 | 0,005 Ucp2     | ENSMUSG00000020935 | 0,259 | 0,030 Dcakd         |
| ENSMUSG00000038374  | 0,377 | 0,036 Rbm8a    | ENSMUSG00000022300 | 0,259 | 0,035 Dcaf13        |
| ENSMUSG000000109243 | 0,377 | 0,000 Gm45867  | ENSMUSG00000036002 | 0,259 | 0,009 Fam214b       |
| ENSMUSG00000028729  | 0,376 | 0,007 Ebna1bp2 | ENSMUSG00000006373 | 0,258 | 0,012 Pgrmc1        |
| ENSMUSG00000045503  | 0,376 | 0,026 Sys1     | ENSMUSG00000000384 | 0,258 | 0,011 Tbrg4         |
| ENSMUSG000000027865 | 0,376 | 0,003 Gdap2    | ENSMUSG00000024404 | 0,257 | 0,029 Riok3         |
| ENSMUSG00000051391  | 0,376 | 0,003 Ywhag    | ENSMUSG00000057497 | 0,257 | 0,020 Fam136a       |
| ENSMUSG00000054793  | 0,376 | 0,010 Cadm4    | ENSMUSG00000057554 | 0,256 | 0,040 Lgals8        |
| ENSMUSG00000030942  | 0,375 | 0,000 Thumpd1  | ENSMUSG00000026353 | 0,255 | 0,003 Ubxn4         |
| ENSMUSG00000006304  | 0,375 | 0,000 Arpc2    | ENSMUSG00000025609 | 0,255 | 0,017 Mkin1         |
| ENSMUSG00000061458  | 0,375 | 0,000 Nol10    | ENSMUSG00000027176 | 0,254 | 0,004 Cstf3         |
| ENSMUSG00000014907  | 0,375 | 0,006 Naf1     | ENSMUSG00000040250 | 0,253 | 0,034 Ints13        |
| ENSMUSG000000025264 | 0,375 | 0,000 Tsr2     | ENSMUSG00000024528 | 0,253 | 0,017 Srfbp1        |
| ENSMUSG00000054237  | 0,374 | 0,015 Fra10ac1 | ENSMUSG00000022634 | 0,251 | 0,006 Yaf2          |
| ENSMUSG00000057788  | 0,374 | 0,018 Ddx49    | ENSMUSG00000027746 | 0,251 | 0,015 Ufm1          |
| ENSMUSG00000035505  | 0,374 | 0,011 Cox18    | ENSMUSG00000038524 | 0,251 | 0,004 Fchsd1        |
| ENSMUSG00000030232  | 0,374 | 0,000 Aebp2    | ENSMUSG00000095567 | 0,250 | 0,028 Noc2l         |
| ENSMUSG00000074781  | 0,374 | 0,000 Ube2n    | ENSMUSG00000022052 | 0,250 | 0,025 Ppp2r2a       |
| ENSMUSG00000004451  | 0,373 | 0,000 Ralb     | ENSMUSG00000022241 | 0,249 | 0,000 Tars          |
| ENSMUSG000000066553 | 0,372 | 0,006 Gm6969   | ENSMUSG00000019868 | 0,248 | 0,048 Vta1          |
| ENSMUSG00000092595  | 0,372 | 0,016 Gm20427  | ENSMUSG00000044496 | 0,248 | 0,000 2510039O18Rik |
| ENSMUSG00000024999  | 0,372 | 0,050 Noc3l    | ENSMUSG00000020283 | 0,248 | 0,008 Pex13         |
| ENSMUSG00000070003  | 0,372 | 0,046 Ssbp4    | ENSMUSG00000020432 | 0,248 | 0,025 Tcn2          |
| ENSMUSG00000006392  | 0,371 | 0,013 Med8     | ENSMUSG00000041645 | 0,247 | 0,008 Ddx24         |
| ENSMUSG00000028563  | 0,370 | 0,013 Tm2d1    | ENSMUSG00000028149 | 0,247 | 0,003 Rap1gds1      |
| ENSMUSG00000040010  | 0,370 | 0,033 Slc7a5   | ENSMUSG00000052144 | 0,246 | 0,047 Ppp4r2        |
| ENSMUSG000000078931 | 0,369 | 0,001 Pdf      | ENSMUSG00000041623 | 0,246 | 0,037 D11Wsu47e     |
| ENSMUSG00000031586  | 0,369 | 0,019 Rbpms    | ENSMUSG00000003808 | 0,245 | 0,012 Farsa         |
| ENSMUSG00000079658  | 0,369 | 0,022 Eloc     | ENSMUSG00000024350 | 0,244 | 0,002 Dnajc18       |
| ENSMUSG00000024327  | 0,368 | 0,002 Slc39a7  | ENSMUSG00000008604 | 0,244 | 0,001 Ubqln4        |
| ENSMUSG00000028318  | 0,368 | 0,033 Polr1e   | ENSMUSG00000032422 | 0,244 | 0,005 Snx14         |
| ENSMUSG00000020549  | 0,368 | 0,000 Elac2    | ENSMUSG00000003813 | 0,244 | 0,048 Rad23a        |
| ENSMUSG00000036693  | 0,367 | 0,000 Nop14    | ENSMUSG00000029528 | 0,243 | 0,011 Pxn           |
| ENSMUSG00000000532  | 0,366 | 0,008 Acvr1b   | ENSMUSG00000017747 | 0,243 | 0,042 Ghdc          |
| ENSMUSG00000024891  | 0,366 | 0,014 Slc29a2  | ENSMUSG00000018965 | 0,243 | 0,005 Ywhah         |
| ENSMUSG00000039474  | 0,366 | 0,005 Wfs1     | ENSMUSG00000047714 | 0,243 | 0,003 Ppp1r2        |
| ENSMUSG00000021905  | 0,365 | 0,005 Dph3     | ENSMUSG00000020630 | 0,242 | 0,046 Rnaseh1       |
| ENSMUSG00000020088  | 0,365 | 0,000 Sar1a    | ENSMUSG00000066150 | 0,241 | 0,019 Slc31a1       |
| ENSMUSG00000013150  | 0,365 | 0,013 Gfod2    | ENSMUSG00000004069 | 0,241 | 0,000 Dnaja3        |
| ENSMUSG00000022313  | 0,365 | 0,008 Utp23    | ENSMUSG00000104953 | 0,241 | 0,009 AC147560.1    |
| ENSMUSG000000001674 | 0,364 | 0,000 Ddx18    | ENSMUSG00000017781 | 0,240 | 0,004 Pitpna        |
| ENSMUSG00000044018  | 0,364 | 0,002 Mrpl50   | ENSMUSG00000070730 | 0,240 | 0,001 Rmdn3         |
| ENSMUSG00000022241  | 0,364 | 0,000 Tars     | ENSMUSG00000001674 | 0,240 | 0,037 Ddx18         |
| ENSMUSG00000022300  | 0,364 | 0,001 Dcaf13   | ENSMUSG00000031422 | 0,239 | 0,011 Morf4l2       |

|                     |       |                     |                    |       |                  |
|---------------------|-------|---------------------|--------------------|-------|------------------|
| ENSMUSG00000055239  | 0,363 | 0,000 Kcmf1         | ENSMUSG00000045795 | 0,239 | 0,013 Whamm      |
| ENSMUSG00000031711  | 0,363 | 0,000 Zfp330        | ENSMUSG00000067787 | 0,239 | 0,001 Blcap      |
| ENSMUSG00000035027  | 0,363 | 0,041 Map2k2        | ENSMUSG00000004460 | 0,239 | 0,018 Dnajb11    |
| ENSMUSG00000053094  | 0,363 | 0,000 Tmem248       | ENSMUSG00000030138 | 0,238 | 0,005 Bms1       |
| ENSMUSG00000026806  | 0,363 | 0,000 Ddx31         | ENSMUSG00000049327 | 0,237 | 0,007 Kmt5a      |
| ENSMUSG00000071645  | 0,363 | 0,001 Tut1          | ENSMUSG00000032320 | 0,235 | 0,040 Rcn2       |
| ENSMUSG00000074480  | 0,363 | 0,046 Mex3a         | ENSMUSG00000023883 | 0,235 | 0,002 Phf10      |
| ENSMUSG00000024800  | 0,362 | 0,015 Rpp30         | ENSMUSG00000029474 | 0,233 | 0,028 Rnf34      |
| ENSMUSG000000040025 | 0,362 | 0,000 Ythdf2        | ENSMUSG00000026930 | 0,232 | 0,035 Gpsm1      |
| ENSMUSG00000061979  | 0,362 | 0,038 Rcc1l         | ENSMUSG00000052681 | 0,232 | 0,045 Rap1b      |
| ENSMUSG00000042558  | 0,362 | 0,015 Adprhl2       | ENSMUSG00000040659 | 0,231 | 0,002 Efh2       |
| ENSMUSG00000024387  | 0,361 | 0,018 Csnk2b        | ENSMUSG00000031931 | 0,231 | 0,028 Ankrd49    |
| ENSMUSG00000064037  | 0,361 | 0,010 Gpn1          | ENSMUSG00000030846 | 0,231 | 0,030 Tial1      |
| ENSMUSG00000029599  | 0,360 | 0,000 Ddx54         | ENSMUSG00000074405 | 0,231 | 0,021 Zfp865     |
| ENSMUSG00000044224  | 0,360 | 0,000 Dnajc21       | ENSMUSG00000020255 | 0,231 | 0,018 D10Wsu102e |
| ENSMUSG000000030036 | 0,360 | 0,001 Mogs          | ENSMUSG00000022538 | 0,230 | 0,013 Lsg1       |
| ENSMUSG00000020458  | 0,358 | 0,024 Rtn4          | ENSMUSG00000028849 | 0,230 | 0,018 Map7d1     |
| ENSMUSG00000037347  | 0,358 | 0,001 Chst7         | ENSMUSG00000040028 | 0,230 | 0,012 Elavl1     |
| ENSMUSG00000014177  | 0,357 | 0,000 Tvp23b        | ENSMUSG00000025287 | 0,230 | 0,039 Acot9      |
| ENSMUSG000000031904 | 0,357 | 0,024 Slc7a6        | ENSMUSG00000053094 | 0,230 | 0,001 Tmem248    |
| ENSMUSG00000028608  | 0,355 | 0,012 0610037L13Rik | ENSMUSG00000044715 | 0,230 | 0,010 Gskip      |
| ENSMUSG00000049401  | 0,354 | 0,016 Ogfr          | ENSMUSG00000024896 | 0,228 | 0,010 Minpp1     |
| ENSMUSG000000019302 | 0,353 | 0,000 Atp6v0a1      | ENSMUSG00000020288 | 0,228 | 0,050 Ahsa2      |
| ENSMUSG00000067787  | 0,353 | 0,000 Blcap         | ENSMUSG00000011179 | 0,227 | 0,038 Odc1       |
| ENSMUSG00000035278  | 0,353 | 0,038 Plekhj1       | ENSMUSG00000058440 | 0,227 | 0,000 Nrf1       |
| ENSMUSG00000028042  | 0,352 | 0,004 Zbtb7b        | ENSMUSG00000029291 | 0,227 | 0,000 Rufy3      |
| ENSMUSG00000000384  | 0,352 | 0,000 Tbrg4         | ENSMUSG00000038848 | 0,226 | 0,015 Ythdf1     |
| ENSMUSG00000047866  | 0,352 | 0,000 Lonp2         | ENSMUSG00000020132 | 0,226 | 0,033 Rab21      |
| ENSMUSG00000032977  | 0,352 | 0,003 Fam207a       | ENSMUSG00000026917 | 0,225 | 0,005 Wdr5       |
| ENSMUSG000000032462 | 0,352 | 0,028 Pik3cb        | ENSMUSG00000064145 | 0,225 | 0,003 Arih2      |
| ENSMUSG000000093904 | 0,352 | 0,001 Tomm20        | ENSMUSG00000034120 | 0,223 | 0,002 Srsf2      |
| ENSMUSG00000028149  | 0,352 | 0,000 Rap1gds1      | ENSMUSG00000029036 | 0,223 | 0,045 Atad3a     |
| ENSMUSG00000028899  | 0,351 | 0,035 Taf12         | ENSMUSG00000035764 | 0,223 | 0,035 Fbxo45     |
| ENSMUSG00000068114  | 0,351 | 0,032 Ccdc134       | ENSMUSG00000015733 | 0,223 | 0,023 Capza2     |
| ENSMUSG00000019804  | 0,351 | 0,002 Snx3          | ENSMUSG00000026889 | 0,222 | 0,007 Rbm18      |
| ENSMUSG00000022538  | 0,350 | 0,000 Lsg1          | ENSMUSG00000022556 | 0,222 | 0,047 Hsf1       |
| ENSMUSG000000056692 | 0,350 | 0,000 D17Wsu92e     | ENSMUSG00000015714 | 0,222 | 0,001 Cers2      |
| ENSMUSG000000091896 | 0,350 | 0,000 Ube2d2a       | ENSMUSG00000018442 | 0,222 | 0,003 Derl2      |
| ENSMUSG00000028889  | 0,350 | 0,001 Yrdc          | ENSMUSG00000028041 | 0,221 | 0,022 Adam15     |
| ENSMUSG00000029038  | 0,350 | 0,049 Ssu72         | ENSMUSG00000025264 | 0,220 | 0,031 Tsr2       |
| ENSMUSG000000037788 | 0,349 | 0,006 Vopp1         | ENSMUSG00000052915 | 0,220 | 0,006 Msl1       |
| ENSMUSG00000028869  | 0,349 | 0,001 Gnl2          | ENSMUSG00000022517 | 0,220 | 0,015 Mgrn1      |
| ENSMUSG000000037752 | 0,349 | 0,005 Xkr8          | ENSMUSG00000005813 | 0,219 | 0,001 Metap1     |
| ENSMUSG000000025871 | 0,348 | 0,000 4833439L19Rik | ENSMUSG00000029629 | 0,219 | 0,002 Phf14      |
| ENSMUSG00000061032  | 0,348 | 0,031 Rrp1          | ENSMUSG00000024097 | 0,218 | 0,029 Srsf7      |
| ENSMUSG00000058392  | 0,347 | 0,001 Rrp1b         | ENSMUSG00000041360 | 0,218 | 0,004 Pum3       |
| ENSMUSG00000050821  | 0,347 | 0,012 Fam131a       | ENSMUSG00000029439 | 0,217 | 0,044 Sfswap     |

|                     |       |                     |                    |       |                     |
|---------------------|-------|---------------------|--------------------|-------|---------------------|
| ENSMUSG00000021692  | 0,347 | 0,008 Dimt1         | ENSMUSG00000024359 | 0,216 | 0,001 Hspa9         |
| ENSMUSG00000032418  | 0,347 | 0,044 Me1           | ENSMUSG00000020549 | 0,216 | 0,020 Elac2         |
| ENSMUSG00000029447  | 0,347 | 0,000 Cct6a         | ENSMUSG00000030374 | 0,216 | 0,001 Strn4         |
| ENSMUSG00000026820  | 0,347 | 0,032 Ptges2        | ENSMUSG00000020116 | 0,215 | 0,010 Pno1          |
| ENSMUSG00000017999  | 0,347 | 0,000 Ddx27         | ENSMUSG00000031568 | 0,214 | 0,050 Rwdd4a        |
| ENSMUSG00000033106  | 0,346 | 0,002 Slc7a6os      | ENSMUSG00000021621 | 0,214 | 0,030 Zcchc9        |
| ENSMUSG00000022634  | 0,346 | 0,000 Yaf2          | ENSMUSG00000031984 | 0,214 | 0,001 2810004N23Rik |
| ENSMUSG00000036733  | 0,344 | 0,039 Rbm42         | ENSMUSG00000004530 | 0,213 | 0,019 Coro1c        |
| ENSMUSG000000045411 | 0,344 | 0,001 2410002F23Rik | ENSMUSG00000005204 | 0,213 | 0,000 Senp3         |
| ENSMUSG00000024150  | 0,344 | 0,000 Mcf2          | ENSMUSG00000068882 | 0,211 | 0,024 Ssb           |
| ENSMUSG00000070953  | 0,344 | 0,004 Rabepk        | ENSMUSG00000026234 | 0,209 | 0,011 Ncl           |
| ENSMUSG00000031885  | 0,344 | 0,041 Cbfb          | ENSMUSG00000038299 | 0,208 | 0,020 Wdr36         |
| ENSMUSG00000026917  | 0,343 | 0,000 Wdr5          | ENSMUSG00000030304 | 0,208 | 0,029 Ergic2        |
| ENSMUSG00000041360  | 0,343 | 0,000 Pum3          | ENSMUSG00000063334 | 0,208 | 0,001 Krr1          |
| ENSMUSG00000032788  | 0,343 | 0,010 Pdxk          | ENSMUSG00000025646 | 0,207 | 0,026 Atrip         |
| ENSMUSG00000033809  | 0,342 | 0,023 Alg3          | ENSMUSG00000006019 | 0,206 | 0,041 Dhx34         |
| ENSMUSG00000027488  | 0,342 | 0,018 Snta1         | ENSMUSG00000032612 | 0,206 | 0,000 Usp4          |
| ENSMUSG00000099681  | 0,342 | 0,044 1700052K11Rik | ENSMUSG00000011257 | 0,205 | 0,003 Pabpc4        |
| ENSMUSG00000003808  | 0,342 | 0,000 Farsa         | ENSMUSG00000023307 | 0,203 | 0,003 March5        |
| ENSMUSG00000028936  | 0,342 | 0,049 Rpl22         | ENSMUSG00000020115 | 0,203 | 0,014 Tbk1          |
| ENSMUSG00000021969  | 0,341 | 0,009 Zdhhc20       | ENSMUSG00000041837 | 0,203 | 0,036 Pcd7          |
| ENSMUSG00000021598  | 0,341 | 0,039 Med10         | ENSMUSG00000027374 | 0,203 | 0,024 Mrps5         |
| ENSMUSG000000043716 | 0,341 | 0,045 Rpl7          | ENSMUSG00000024182 | 0,201 | 0,004 Axin1         |
| ENSMUSG00000034259  | 0,340 | 0,011 Exosc4        | ENSMUSG00000037553 | 0,200 | 0,018 Zdhhc18       |
| ENSMUSG00000019297  | 0,340 | 0,001 Nop9          | ENSMUSG00000038563 | 0,197 | 0,021 Efl1          |
| ENSMUSG00000058440  | 0,339 | 0,000 Nrf1          | ENSMUSG00000026571 | 0,196 | 0,024 Dcaf6         |
| ENSMUSG000000066150 | 0,338 | 0,000 Slc31a1       | ENSMUSG00000028086 | 0,196 | 0,040 Fbxw7         |
| ENSMUSG00000024048  | 0,338 | 0,014 Myl12a        | ENSMUSG00000032042 | 0,195 | 0,039 Srpr          |
| ENSMUSG00000018583  | 0,338 | 0,000 G3bp1         | ENSMUSG00000005312 | 0,193 | 0,044 Ubqln1        |
| ENSMUSG000000059248 | 0,337 | 0,000 Sept9         | ENSMUSG00000029064 | 0,193 | 0,009 Gnb1          |
| ENSMUSG00000032497  | 0,336 | 0,001 Lrrfip2       | ENSMUSG00000029028 | 0,189 | 0,004 Lrrc47        |
| ENSMUSG00000045934  | 0,335 | 0,043 Mtmr11        | ENSMUSG00000029447 | 0,189 | 0,040 Cct6a         |
| ENSMUSG00000022035  | 0,335 | 0,009 Ccdc25        | ENSMUSG00000056050 | 0,189 | 0,048 Mia3          |
| ENSMUSG00000028156  | 0,334 | 0,000 Eif4e         | ENSMUSG00000025178 | 0,188 | 0,007 Pi4k2a        |
| ENSMUSG00000026817  | 0,334 | 0,014 Ak1           | ENSMUSG00000056820 | 0,188 | 0,007 Tsnax         |
| ENSMUSG00000029780  | 0,334 | 0,007 Nt5c3         | ENSMUSG00000029500 | 0,187 | 0,030 Pgam5         |
| ENSMUSG000000020733 | 0,334 | 0,005 Slc9a3r1      | ENSMUSG00000042901 | 0,187 | 0,043 Aida          |
| ENSMUSG00000032557  | 0,333 | 0,000 Uba5          | ENSMUSG00000007411 | 0,186 | 0,001 Mark3         |
| ENSMUSG00000003813  | 0,333 | 0,002 Rad23a        | ENSMUSG00000020088 | 0,184 | 0,016 Sar1a         |
| ENSMUSG00000032563  | 0,333 | 0,000 Mrpl3         | ENSMUSG00000023075 | 0,184 | 0,050 Akirin1       |
| ENSMUSG00000005846  | 0,333 | 0,005 Rsl1d1        | ENSMUSG00000079562 | 0,184 | 0,001 Maea          |
| ENSMUSG00000071256  | 0,333 | 0,030 Zfp213        | ENSMUSG00000021096 | 0,183 | 0,001 Ppm1a         |
| ENSMUSG00000026049  | 0,332 | 0,027 Tex30         | ENSMUSG00000056692 | 0,183 | 0,001 D17Wsu92e     |
| ENSMUSG000000040699 | 0,332 | 0,041 Limd2         | ENSMUSG00000071646 | 0,182 | 0,044 Mta2          |
| ENSMUSG00000034024  | 0,332 | 0,001 Cct2          | ENSMUSG00000032870 | 0,181 | 0,025 Smap2         |
| ENSMUSG00000048707  | 0,331 | 0,002 Tprn          | ENSMUSG00000014601 | 0,180 | 0,001 Strip1        |
| ENSMUSG00000050017  | 0,330 | 0,000 Pitpnb        | ENSMUSG00000001785 | 0,177 | 0,012 Pwp1          |



|                     |       |                  |                     |        |                |
|---------------------|-------|------------------|---------------------|--------|----------------|
| ENSMUSG00000073771  | 0,330 | 0,027 Btbd19     | ENSMUSG00000038990  | 0,177  | 0,045 Cables2  |
| ENSMUSG00000022184  | 0,330 | 0,016 Fbxo4      | ENSMUSG00000028161  | 0,177  | 0,025 Ppp3ca   |
| ENSMUSG00000027968  | 0,330 | 0,014 Larp7      | ENSMUSG00000047731  | 0,170  | 0,018 Wbp1l    |
| ENSMUSG00000037296  | 0,330 | 0,015 Lsm1       | ENSMUSG00000027706  | 0,170  | 0,048 Sec62    |
| ENSMUSG00000025155  | 0,329 | 0,007 Dus1l      | ENSMUSG00000026926  | 0,169  | 0,000 Pmpca    |
| ENSMUSG00000022434  | 0,328 | 0,008 Fam118a    | ENSMUSG00000029227  | 0,169  | 0,045 Fip11l   |
| ENSMUSG00000025580  | 0,328 | 0,015 Eif4a3     | ENSMUSG00000033335  | 0,165  | 0,043 Dnm2     |
| ENSMUSG00000045598  | 0,328 | 0,007 Zfp553     | ENSMUSG00000032582  | 0,163  | 0,005 Rbm6     |
| ENSMUSG000000052151 | 0,328 | 0,049 Plpp2      | ENSMUSG00000024527  | 0,162  | 0,015 Afg3l2   |
| ENSMUSG00000115293  | 0,327 | 0,009 Ece2       | ENSMUSG00000059119  | 0,159  | 0,027 Nap1l4   |
| ENSMUSG00000104953  | 0,327 | 0,000 AC147560.1 | ENSMUSG00000031575  | 0,158  | 0,004 Ash2l    |
| ENSMUSG00000020092  | 0,327 | 0,012 Pald1      | ENSMUSG00000046722  | 0,157  | 0,010 Cdc42se1 |
| ENSMUSG000000021242 | 0,327 | 0,019 Npc2       | ENSMUSG00000014959  | 0,153  | 0,018 Gorasp2  |
| ENSMUSG00000029050  | 0,327 | 0,048 Ski        | ENSMUSG00000051934  | 0,152  | 0,048 Spats2   |
| ENSMUSG00000021645  | 0,326 | 0,011 Smn1       | ENSMUSG00000037669  | 0,151  | 0,043 Ldah     |
| ENSMUSG000000045624 | 0,326 | 0,006 Esf1       | ENSMUSG00000062270  | 0,141  | 0,019 Morf4l1  |
| ENSMUSG00000042660  | 0,326 | 0,025 Wdr55      | ENSMUSG00000024587  | 0,139  | 0,035 Nars     |
| ENSMUSG00000078768  | 0,325 | 0,047 Zfp566     | ENSMUSG00000029518  | 0,129  | 0,019 Rab35    |
| ENSMUSG00000028848  | 0,325 | 0,044 Gpn2       | ENSMUSG00000026848  | 0,126  | 0,019 Tor1b    |
| ENSMUSG00000002147  | 0,325 | 0,003 Stat6      | ENSMUSG00000079477  | 0,121  | 0,046 Rab7     |
| ENSMUSG00000056091  | 0,325 | 0,008 St3gal5    | ENSMUSG00000024853  | -0,117 | 0,046 Sf3b2    |
| ENSMUSG00000003068  | 0,324 | 0,021 Stk11      | ENSMUSG00000017721  | -0,126 | 0,048 Pigt     |
| ENSMUSG000000018848 | 0,324 | 0,001 Rars       | ENSMUSG000000111497 | -0,136 | 0,013 Raver1   |
| ENSMUSG000000031627 | 0,324 | 0,027 Irf2       | ENSMUSG00000013787  | -0,140 | 0,016 Ehmt2    |
| ENSMUSG00000029064  | 0,324 | 0,000 Gnb1       | ENSMUSG00000026269  | -0,144 | 0,037 Rnpepl1  |
| ENSMUSG00000028152  | 0,323 | 0,000 Tspan5     | ENSMUSG00000029103  | -0,146 | 0,049 Lrpap1   |
| ENSMUSG00000027339  | 0,323 | 0,045 Rassf2     | ENSMUSG00000034951  | -0,148 | 0,045 Cog7     |
| ENSMUSG00000061689  | 0,322 | 0,000 Dlgap4     | ENSMUSG00000020265  | -0,161 | 0,037 Sumo3    |
| ENSMUSG00000028796  | 0,322 | 0,001 Phc2       | ENSMUSG00000026554  | -0,164 | 0,041 Dcaf8    |
| ENSMUSG00000002257  | 0,322 | 0,024 Def6       | ENSMUSG00000010936  | -0,164 | 0,007 Vac14    |
| ENSMUSG00000054302  | 0,322 | 0,004 Eapp       | ENSMUSG00000024096  | -0,164 | 0,027 Ralbp1   |
| ENSMUSG00000014959  | 0,322 | 0,000 Gorasp2    | ENSMUSG00000001424  | -0,164 | 0,011 Snd1     |
| ENSMUSG00000020283  | 0,322 | 0,000 Pex13      | ENSMUSG00000030884  | -0,165 | 0,001 Uqcrc2   |
| ENSMUSG00000024213  | 0,321 | 0,014 Nudt3      | ENSMUSG00000028656  | -0,167 | 0,047 Cap1     |
| ENSMUSG00000018697  | 0,321 | 0,004 Aatf       | ENSMUSG00000026853  | -0,168 | 0,021 Crat     |
| ENSMUSG00000003134  | 0,321 | 0,012 Tbc1d8     | ENSMUSG00000025534  | -0,169 | 0,009 Gusb     |
| ENSMUSG000000039176 | 0,321 | 0,001 Polg       | ENSMUSG00000038861  | -0,169 | 0,019 Pi4kb    |
| ENSMUSG000000039183 | 0,319 | 0,015 Nubp2      | ENSMUSG00000020792  | -0,173 | 0,024 Exoc7    |
| ENSMUSG00000021501  | 0,319 | 0,001 Caml       | ENSMUSG00000107283  | -0,177 | 0,017 Mpv17    |
| ENSMUSG00000042111  | 0,319 | 0,006 Ccdc115    | ENSMUSG00000053333  | -0,177 | 0,043 Dis3l2   |
| ENSMUSG00000025647  | 0,318 | 0,010 Shisa5     | ENSMUSG00000049339  | -0,178 | 0,019 Retreg2  |
| ENSMUSG00000032171  | 0,318 | 0,048 Pin1       | ENSMUSG00000034371  | -0,179 | 0,023 Tkfc     |
| ENSMUSG00000028041  | 0,317 | 0,000 Adam15     | ENSMUSG00000000552  | -0,180 | 0,044 Zfp385a  |
| ENSMUSG000000091780 | 0,317 | 0,041 Sco2       | ENSMUSG00000032187  | -0,181 | 0,032 Smarca4  |
| ENSMUSG00000020246  | 0,317 | 0,022 Hcfc2      | ENSMUSG00000024740  | -0,182 | 0,036 Ddb1     |
| ENSMUSG00000037197  | 0,317 | 0,008 Rbm17      | ENSMUSG00000032388  | -0,183 | 0,021 Spg21    |
| ENSMUSG00000047714  | 0,317 | 0,000 Ppp1r2     | ENSMUSG00000015889  | -0,184 | 0,018 Lta4h    |

|                     |       |                |                     |        |               |
|---------------------|-------|----------------|---------------------|--------|---------------|
| ENSMUSG00000035890  | 0,316 | 0,029 Rnf126   | ENSMUSG00000025041  | -0,185 | 0,026 Nt5c2   |
| ENSMUSG00000059820  | 0,316 | 0,006 AU019823 | ENSMUSG00000025736  | -0,188 | 0,013 JmjD8   |
| ENSMUSG00000028955  | 0,316 | 0,000 Vamp3    | ENSMUSG00000020375  | -0,189 | 0,033 Ruffy1  |
| ENSMUSG00000024583  | 0,316 | 0,004 Txnl1    | ENSMUSG00000028757  | -0,190 | 0,048 Ddost   |
| ENSMUSG00000089832  | 0,316 | 0,002 Shkbp1   | ENSMUSG00000029345  | -0,190 | 0,025 Tfip11  |
| ENSMUSG00000024875  | 0,316 | 0,019 Yif1a    | ENSMUSG00000022051  | -0,190 | 0,011 Bnip3l  |
| ENSMUSG00000018442  | 0,316 | 0,000 Derl2    | ENSMUSG00000022678  | -0,191 | 0,036 Nde1    |
| ENSMUSG00000053253  | 0,316 | 0,006 Ndfip2   | ENSMUSG00000005469  | -0,191 | 0,000 Prkaca  |
| ENSMUSG000000020432 | 0,316 | 0,002 Tcn2     | ENSMUSG000000034189 | -0,191 | 0,026 Hsd1l   |
| ENSMUSG00000006705  | 0,315 | 0,005 Pknox1   | ENSMUSG00000021218  | -0,191 | 0,003 Gdi2    |
| ENSMUSG00000025940  | 0,315 | 0,008 Tmem70   | ENSMUSG00000031864  | -0,196 | 0,017 Ints10  |
| ENSMUSG00000029028  | 0,314 | 0,000 Lrrc47   | ENSMUSG00000028954  | -0,196 | 0,039 Nub1    |
| ENSMUSG00000036376  | 0,314 | 0,050 Abt1     | ENSMUSG00000052395  | -0,197 | 0,007 Rft1    |
| ENSMUSG00000030189  | 0,314 | 0,018 Ybx3     | ENSMUSG00000036980  | -0,197 | 0,026 Taf6    |
| ENSMUSG00000032567  | 0,314 | 0,043 Aste1    | ENSMUSG00000027810  | -0,198 | 0,019 Eif2a   |
| ENSMUSG000000021774 | 0,314 | 0,001 Ube2e1   | ENSMUSG000000068335 | -0,202 | 0,038 Dok1    |
| ENSMUSG00000029036  | 0,314 | 0,001 Atad3a   | ENSMUSG00000027809  | -0,202 | 0,004 Etfdh   |
| ENSMUSG00000020476  | 0,313 | 0,000 Dbnl     | ENSMUSG00000038417  | -0,202 | 0,022 Fig4    |
| ENSMUSG00000025337  | 0,312 | 0,005 Sbds     | ENSMUSG00000032527  | -0,202 | 0,017 Pccb    |
| ENSMUSG00000027357  | 0,312 | 0,047 Cris1    | ENSMUSG00000029536  | -0,203 | 0,030 Gatc    |
| ENSMUSG00000038213  | 0,312 | 0,001 Tapbpl   | ENSMUSG00000032513  | -0,204 | 0,028 Gorasp1 |
| ENSMUSG00000015363  | 0,310 | 0,005 Trabd    | ENSMUSG00000024507  | -0,206 | 0,004 Hsd17b4 |
| ENSMUSG000000009566 | 0,310 | 0,000 Fpgs     | ENSMUSG000000063801 | -0,207 | 0,003 Ap3s2   |
| ENSMUSG00000041354  | 0,310 | 0,010 Rgl2     | ENSMUSG00000000171  | -0,207 | 0,047 Sdhd    |
| ENSMUSG00000037331  | 0,310 | 0,028 Larp1    | ENSMUSG00000014748  | -0,207 | 0,003 Tex261  |
| ENSMUSG00000008496  | 0,310 | 0,022 Pou2f2   | ENSMUSG00000022965  | -0,208 | 0,007 Ifngr2  |
| ENSMUSG00000020922  | 0,310 | 0,050 Lsm12    | ENSMUSG00000001082  | -0,209 | 0,048 Mfsd10  |
| ENSMUSG00000079111  | 0,310 | 0,001 Kdelr2   | ENSMUSG00000022620  | -0,210 | 0,029 Arsa    |
| ENSMUSG00000025227  | 0,309 | 0,016 Mfsd13a  | ENSMUSG00000042590  | -0,212 | 0,007 lpo11   |
| ENSMUSG000000035764 | 0,309 | 0,001 Fbxo45   | ENSMUSG000000073096 | -0,215 | 0,040 Lrrc61  |
| ENSMUSG00000020361  | 0,308 | 0,000 Hspa4    | ENSMUSG00000002871  | -0,215 | 0,047 Tpra1   |
| ENSMUSG00000063229  | 0,308 | 0,045 Ldha     | ENSMUSG00000032264  | -0,217 | 0,044 Zw10    |
| ENSMUSG00000025384  | 0,308 | 0,001 Faap100  | ENSMUSG00000042032  | -0,217 | 0,003 Mat2b   |
| ENSMUSG00000055065  | 0,308 | 0,047 Ddx17    | ENSMUSG00000022889  | -0,217 | 0,035 Mrpl39  |
| ENSMUSG00000083282  | 0,307 | 0,007 Ctsf     | ENSMUSG00000050043  | -0,218 | 0,011 Tmx2    |
| ENSMUSG00000038712  | 0,307 | 0,013 Mindy1   | ENSMUSG00000028291  | -0,218 | 0,018 Akirin2 |
| ENSMUSG000000013698 | 0,306 | 0,001 Pea15a   | ENSMUSG000000032547 | -0,218 | 0,009 Ryk     |
| ENSMUSG00000026723  | 0,306 | 0,045 Trdmt1   | ENSMUSG00000029007  | -0,219 | 0,021 Agtrap  |
| ENSMUSG00000032479  | 0,306 | 0,011 Map4     | ENSMUSG00000021646  | -0,219 | 0,016 Mccc2   |
| ENSMUSG000000057130 | 0,305 | 0,018 Txnl4a   | ENSMUSG00000000594  | -0,219 | 0,026 Gm2a    |
| ENSMUSG00000032290  | 0,305 | 0,049 Ptpn9    | ENSMUSG00000029550  | -0,220 | 0,000 Sppl3   |
| ENSMUSG00000027422  | 0,305 | 0,000 Rrbp1    | ENSMUSG00000049287  | -0,221 | 0,014 Iba57   |
| ENSMUSG00000041264  | 0,304 | 0,001 Uspl1    | ENSMUSG00000025722  | -0,222 | 0,027 Wdr73   |
| ENSMUSG000000025178 | 0,304 | 0,000 Pi4k2a   | ENSMUSG00000020818  | -0,222 | 0,011 Mfsd11  |
| ENSMUSG00000036707  | 0,304 | 0,003 Cab39    | ENSMUSG00000033933  | -0,224 | 0,008 Vhl     |
| ENSMUSG00000009630  | 0,304 | 0,000 Ppp2cb   | ENSMUSG00000005981  | -0,225 | 0,020 Trap1   |
| ENSMUSG00000007075  | 0,303 | 0,037 Eid2b    | ENSMUSG00000020538  | -0,227 | 0,049 Srebf1  |

|                      |       |                     |                      |        |                     |
|----------------------|-------|---------------------|----------------------|--------|---------------------|
| ENSMUSG00000032285   | 0,303 | 0,004 Dnaja4        | ENSMUSG00000029592   | -0,228 | 0,032 Usp30         |
| ENSMUSG000000062580  | 0,303 | 0,010 Timm17a       | ENSMUSG00000029073   | -0,228 | 0,028 Cptp          |
| ENSMUSG000000029500  | 0,302 | 0,000 Pgam5         | ENSMUSG00000009079   | -0,228 | 0,005 Ewsr1         |
| ENSMUSG000000020869  | 0,302 | 0,000 Lrrc59        | ENSMUSG00000039637   | -0,229 | 0,044 Coro7         |
| ENSMUSG000000043683  | 0,302 | 0,002 Fem1a         | ENSMUSG00000031161   | -0,229 | 0,003 Hdac6         |
| ENSMUSG000000005312  | 0,302 | 0,000 Ubqln1        | ENSMUSG000000024197  | -0,229 | 0,025 Plin3         |
| ENSMUSG000000020392  | 0,301 | 0,030 Cdkn2aipnl    | ENSMUSG000000029578  | -0,230 | 0,003 Wipi2         |
| ENSMUSG000000024712  | 0,301 | 0,001 Rfk           | ENSMUSG000000021048  | -0,233 | 0,031 Mthfd1        |
| ENSMUSG000000030871  | 0,301 | 0,004 Ears2         | ENSMUSG000000001034  | -0,234 | 0,013 Mapk7         |
| ENSMUSG000000048429  | 0,301 | 0,000 Timm29        | ENSMUSG000000022750  | -0,234 | 0,006 Khlh22        |
| ENSMUSG000000019927  | 0,301 | 0,000 Ube2d1        | ENSMUSG000000035206  | -0,235 | 0,005 Sppl2b        |
| ENSMUSG000000033728  | 0,301 | 0,001 Lrrc14        | ENSMUSG000000029705  | -0,236 | 0,016 Cux1          |
| ENSMUSG000000029147  | 0,301 | 0,001 Ppm1g         | ENSMUSG000000027523  | -0,236 | 0,042 Gnas          |
| ENSMUSG000000015733  | 0,301 | 0,001 Capza2        | ENSMUSG000000037344  | -0,237 | 0,019 Slc12a9       |
| ENSMUSG000000002017  | 0,300 | 0,007 Fam98a        | ENSMUSG000000005505  | -0,239 | 0,007 Kbtbd4        |
| ENSMUSG0000000049090 | 0,300 | 0,024 Zadh2         | ENSMUSG000000006288  | -0,239 | 0,011 Ttc5          |
| ENSMUSG000000025287  | 0,299 | 0,002 Acot9         | ENSMUSG000000026792  | -0,239 | 0,017 Lrsam1        |
| ENSMUSG000000046792  | 0,299 | 0,010 Zfp787        | ENSMUSG000000031077  | -0,239 | 0,048 Fadd          |
| ENSMUSG000000053289  | 0,298 | 0,001 Ddx10         | ENSMUSG000000029175  | -0,241 | 0,040 Slc35f6       |
| ENSMUSG000000032553  | 0,298 | 0,000 Srprb         | ENSMUSG000000013646  | -0,241 | 0,006 Sh3bp5l       |
| ENSMUSG000000037553  | 0,298 | 0,000 Zdhhc18       | ENSMUSG000000038545  | -0,242 | 0,006 Cul7          |
| ENSMUSG000000025939  | 0,298 | 0,048 Ube2w         | ENSMUSG000000079334  | -0,242 | 0,029 Nat6          |
| ENSMUSG0000000034729 | 0,297 | 0,036 Mrps10        | ENSMUSG000000029247  | -0,243 | 0,000 Paics         |
| ENSMUSG000000024359  | 0,297 | 0,000 Hspa9         | ENSMUSG000000003810  | -0,243 | 0,017 Mast2         |
| ENSMUSG000000040028  | 0,296 | 0,000 Elavl1        | ENSMUSG000000016619  | -0,243 | 0,021 Nup50         |
| ENSMUSG000000038268  | 0,296 | 0,020 Ovca2         | ENSMUSG000000079316  | -0,243 | 0,032 Rab9          |
| ENSMUSG000000029048  | 0,296 | 0,018 Rer1          | ENSMUSG000000013833  | -0,244 | 0,002 Med16         |
| ENSMUSG000000021938  | 0,295 | 0,030 Pspc1         | ENSMUSG000000026404  | -0,244 | 0,046 Ddx59         |
| ENSMUSG000000018446  | 0,294 | 0,028 C1qbp         | ENSMUSG000000025950  | -0,244 | 0,040 Idh1          |
| ENSMUSG0000000001785 | 0,294 | 0,000 Pwp1          | ENSMUSG0000000037278 | -0,244 | 0,045 Tmem97        |
| ENSMUSG000000021595  | 0,294 | 0,001 Nsun2         | ENSMUSG000000029781  | -0,245 | 0,008 Fkbp9         |
| ENSMUSG000000026701  | 0,294 | 0,016 Prdx6         | ENSMUSG000000039231  | -0,247 | 0,004 Suv39h1       |
| ENSMUSG000000031984  | 0,293 | 0,000 2810004N23Rik | ENSMUSG000000026816  | -0,249 | 0,015 Gtf3c5        |
| ENSMUSG000000005354  | 0,292 | 0,046 Txn2          | ENSMUSG000000049643  | -0,249 | 0,004 2310022A10Rik |
| ENSMUSG000000022615  | 0,292 | 0,045 Tymp          | ENSMUSG000000037012  | -0,249 | 0,010 Hk1           |
| ENSMUSG000000059119  | 0,292 | 0,000 Nap1l4        | ENSMUSG000000036120  | -0,251 | 0,010 Rfxank        |
| ENSMUSG000000029672  | 0,291 | 0,000 Fam3c         | ENSMUSG000000079442  | -0,252 | 0,041 St6galnac4    |
| ENSMUSG000000000881  | 0,291 | 0,008 Dlg3          | ENSMUSG000000027010  | -0,253 | 0,015 Slc25a12      |
| ENSMUSG000000025016  | 0,291 | 0,048 Tm9sf3        | ENSMUSG000000022898  | -0,253 | 0,000 Dscr3         |
| ENSMUSG000000007891  | 0,290 | 0,048 Ctsd          | ENSMUSG000000008140  | -0,253 | 0,036 Emc10         |
| ENSMUSG000000053091  | 0,289 | 0,003 Lins1         | ENSMUSG000000062376  | -0,256 | 0,001 Borcs7        |
| ENSMUSG000000022498  | 0,289 | 0,000 Txndc11       | ENSMUSG000000026174  | -0,258 | 0,002 Cnot9         |
| ENSMUSG000000002210  | 0,289 | 0,038 Smg9          | ENSMUSG000000028439  | -0,259 | 0,023 Fam219a       |
| ENSMUSG0000000027509 | 0,289 | 0,003 Rae1          | ENSMUSG000000018651  | -0,259 | 0,001 Tada2a        |
| ENSMUSG000000018965  | 0,288 | 0,000 Ywhah         | ENSMUSG000000022414  | -0,260 | 0,022 Tab1          |
| ENSMUSG000000020386  | 0,288 | 0,010 Sar1b         | ENSMUSG000000020472  | -0,260 | 0,034 Zkscan17      |
| ENSMUSG000000052310  | 0,288 | 0,000 Slc39a1       | ENSMUSG000000018841  | -0,261 | 0,022 Rad51d        |

|                      |       |                     |                     |        |                |
|----------------------|-------|---------------------|---------------------|--------|----------------|
| ENSMUSG00000009535   | 0,287 | 0,000 Rnmt          | ENSMUSG00000003038  | -0,261 | 0,014 Hmgn2    |
| ENSMUSG000000068798  | 0,287 | 0,002 Rap1a         | ENSMUSG000000031672 | -0,263 | 0,007 Got2     |
| ENSMUSG000000038299  | 0,287 | 0,000 Wdr36         | ENSMUSG000000041491 | -0,263 | 0,037 Cep78    |
| ENSMUSG000000029131  | 0,287 | 0,002 Dnajb6        | ENSMUSG000000028799 | -0,264 | 0,002 Zfp362   |
| ENSMUSG000000021615  | 0,286 | 0,046 Xrcc4         | ENSMUSG000000068551 | -0,266 | 0,028 Zfp467   |
| ENSMUSG000000031153  | 0,286 | 0,011 Gripap1       | ENSMUSG000000033628 | -0,268 | 0,002 Pik3c3   |
| ENSMUSG000000044847  | 0,286 | 0,027 Lsm11         | ENSMUSG000000016541 | -0,268 | 0,004 Atnx10   |
| ENSMUSG000000028932  | 0,286 | 0,047 Psmc2         | ENSMUSG000000026709 | -0,269 | 0,028 Dars2    |
| ENSMUSG0000000047187 | 0,286 | 0,004 Rab2a         | ENSMUSG000000058388 | -0,273 | 0,015 Phtf1    |
| ENSMUSG000000044030  | 0,286 | 0,013 Irf2bp1       | ENSMUSG000000021900 | -0,274 | 0,000 Btd      |
| ENSMUSG000000011958  | 0,286 | 0,000 Bnip2         | ENSMUSG000000025465 | -0,274 | 0,006 Echs1    |
| ENSMUSG000000021037  | 0,286 | 0,027 Ahsa1         | ENSMUSG000000030614 | -0,275 | 0,033 Tmem126b |
| ENSMUSG000000014226  | 0,286 | 0,025 Cacybp        | ENSMUSG000000074811 | -0,275 | 0,010 Hps6     |
| ENSMUSG000000019814  | 0,286 | 0,004 Ltv1          | ENSMUSG000000011752 | -0,275 | 0,010 Pgam1    |
| ENSMUSG000000030120  | 0,285 | 0,013 Mlf2          | ENSMUSG000000085793 | -0,276 | 0,015 Lin52    |
| ENSMUSG0000000049327 | 0,285 | 0,000 Kmt5a         | ENSMUSG000000001751 | -0,277 | 0,013 Naglu    |
| ENSMUSG000000034620  | 0,284 | 0,003 Tmem5         | ENSMUSG000000016757 | -0,278 | 0,018 Ttl12    |
| ENSMUSG000000005103  | 0,284 | 0,000 Wdr1          | ENSMUSG000000008855 | -0,280 | 0,005 Hdac5    |
| ENSMUSG000000027502  | 0,284 | 0,019 Rtfdc1        | ENSMUSG000000001445 | -0,280 | 0,046 Mrpl10   |
| ENSMUSG0000000031657 | 0,284 | 0,014 Heatr3        | ENSMUSG000000030872 | -0,281 | 0,021 Gga2     |
| ENSMUSG000000056820  | 0,283 | 0,000 Tsnax         | ENSMUSG000000002297 | -0,282 | 0,029 Dbf4     |
| ENSMUSG000000026927  | 0,282 | 0,000 Sdccag3       | ENSMUSG000000000149 | -0,283 | 0,024 Gna12    |
| ENSMUSG0000000029203 | 0,282 | 0,011 Ube2k         | ENSMUSG000000031539 | -0,283 | 0,042 Ap3m2    |
| ENSMUSG000000031982  | 0,281 | 0,041 Arv1          | ENSMUSG000000040997 | -0,284 | 0,012 Abhd4    |
| ENSMUSG000000005204  | 0,281 | 0,000 Senp3         | ENSMUSG000000028973 | -0,284 | 0,000 Abcb8    |
| ENSMUSG000000023030  | 0,281 | 0,010 Slc11a2       | ENSMUSG000000039328 | -0,284 | 0,041 Rnf122   |
| ENSMUSG0000000052419 | 0,281 | 0,007 2610001J05Rik | ENSMUSG000000036561 | -0,285 | 0,026 Ppp6r2   |
| ENSMUSG0000000032307 | 0,280 | 0,014 Ube2q2        | ENSMUSG000000026003 | -0,285 | 0,003 Acadl    |
| ENSMUSG0000000032612 | 0,280 | 0,000 Usp4          | ENSMUSG000000021477 | -0,285 | 0,012 Ctsl     |
| ENSMUSG0000000031960 | 0,280 | 0,001 Aars          | ENSMUSG000000033065 | -0,288 | 0,006 Pfkam    |
| ENSMUSG000000036432  | 0,280 | 0,047 Siah2         | ENSMUSG000000028646 | -0,288 | 0,002 Rragc    |
| ENSMUSG000000079477  | 0,279 | 0,000 Rab7          | ENSMUSG000000051007 | -0,288 | 0,029 Gatd1    |
| ENSMUSG000000114763  | 0,279 | 0,004 AC134869.3    | ENSMUSG000000057156 | -0,288 | 0,028 Homez    |
| ENSMUSG0000000032870 | 0,279 | 0,000 Smap2         | ENSMUSG000000032245 | -0,289 | 0,007 Cln6     |
| ENSMUSG000000034708  | 0,278 | 0,006 Grn           | ENSMUSG000000028089 | -0,290 | 0,011 Chd1l    |
| ENSMUSG000000036934  | 0,278 | 0,022 4921524J17Rik | ENSMUSG000000031684 | -0,291 | 0,019 Slc10a7  |
| ENSMUSG0000000021392 | 0,278 | 0,031 Nol8          | ENSMUSG000000029547 | -0,291 | 0,024 Ints1    |
| ENSMUSG0000000035297 | 0,278 | 0,002 Cops4         | ENSMUSG000000007950 | -0,291 | 0,047 Abhd8    |
| ENSMUSG000000022108  | 0,278 | 0,000 Itm2b         | ENSMUSG000000034714 | -0,292 | 0,035 Ttyh2    |
| ENSMUSG0000000031007 | 0,278 | 0,024 Atp6ap2       | ENSMUSG000000044573 | -0,292 | 0,004 Acp1     |
| ENSMUSG0000000021876 | 0,278 | 0,034 Rnase4        | ENSMUSG000000038206 | -0,292 | 0,002 Fbxo8    |
| ENSMUSG000000074698  | 0,278 | 0,010 Csnk2a1       | ENSMUSG000000028484 | -0,293 | 0,001 Psip1    |
| ENSMUSG000000042148  | 0,277 | 0,007 Cox10         | ENSMUSG000000027227 | -0,293 | 0,021 Sord     |
| ENSMUSG0000000021087 | 0,277 | 0,031 Rtn1          | ENSMUSG000000002803 | -0,293 | 0,009 Btbd6    |
| ENSMUSG000000022663  | 0,277 | 0,001 Atg3          | ENSMUSG000000099519 | -0,293 | 0,000 Gm29253  |
| ENSMUSG000000106561  | 0,276 | 0,016 AC151967.1    | ENSMUSG000000036622 | -0,295 | 0,001 Atp13a2  |
| ENSMUSG0000000034343 | 0,276 | 0,005 Ube2f         | ENSMUSG000000019715 | -0,296 | 0,000 Gle1     |



|                      |       |                     |                    |        |                     |
|----------------------|-------|---------------------|--------------------|--------|---------------------|
| ENSMUSG00000025532   | 0,276 | 0,009 Crcp          | ENSMUSG00000028164 | -0,296 | 0,011 Manba         |
| ENSMUSG00000028849   | 0,275 | 0,002 Map7d1        | ENSMUSG00000074093 | -0,296 | 0,043 Svip          |
| ENSMUSG00000041623   | 0,275 | 0,010 D11Wsu47e     | ENSMUSG00000037622 | -0,297 | 0,015 Wdtdc1        |
| ENSMUSG00000026234   | 0,274 | 0,000 Ncl           | ENSMUSG00000028779 | -0,297 | 0,018 Pef1          |
| ENSMUSG00000025646   | 0,274 | 0,001 Atrip         | ENSMUSG00000034487 | -0,298 | 0,003 Kdelc2        |
| ENSMUSG00000016257   | 0,274 | 0,004 Prelid3b      | ENSMUSG00000024165 | -0,298 | 0,046 Jpt2          |
| ENSMUSG00000070730   | 0,274 | 0,000 Rmdn3         | ENSMUSG00000070425 | -0,298 | 0,047 Xntrpc        |
| ENSMUSG00000008604   | 0,274 | 0,000 Ubqln4        | ENSMUSG00000024975 | -0,299 | 0,016 Pdc4          |
| ENSMUSG000000052681  | 0,273 | 0,010 Rap1b         | ENSMUSG00000057778 | -0,299 | 0,035 Cyb5d2        |
| ENSMUSG00000030890   | 0,273 | 0,007 Ilk           | ENSMUSG00000060703 | -0,299 | 0,049 Cd302         |
| ENSMUSG00000022560   | 0,272 | 0,001 Slc52a2       | ENSMUSG00000020605 | -0,300 | 0,004 Hs1bp3        |
| ENSMUSG00000019792   | 0,272 | 0,032 Trmt11        | ENSMUSG00000037049 | -0,300 | 0,000 Smpd1         |
| ENSMUSG00000007415   | 0,272 | 0,002 Gatad1        | ENSMUSG00000049670 | -0,301 | 0,038 Morn4         |
| ENSMUSG00000031568   | 0,271 | 0,005 Rwd4a         | ENSMUSG00000024556 | -0,302 | 0,041 Me2           |
| ENSMUSG00000050088   | 0,270 | 0,001 1600012H06Rik | ENSMUSG00000029270 | -0,303 | 0,028 Fam69a        |
| ENSMUSG000000022312  | 0,270 | 0,050 Eif3h         | ENSMUSG00000000959 | -0,303 | 0,004 Oxa1l         |
| ENSMUSG00000025616   | 0,269 | 0,020 Usp16         | ENSMUSG00000067369 | -0,304 | 0,008 Trmt2b        |
| ENSMUSG00000078317   | 0,269 | 0,042 F8a           | ENSMUSG00000041199 | -0,304 | 0,037 Rpusd1        |
| ENSMUSG00000025613   | 0,268 | 0,001 Cct8          | ENSMUSG00000021023 | -0,304 | 0,034 1110008L16Rik |
| ENSMUSG00000024896   | 0,268 | 0,001 Minpp1        | ENSMUSG00000043964 | -0,305 | 0,001 Orai3         |
| ENSMUSG00000001518   | 0,267 | 0,021 Itfg2         | ENSMUSG00000026198 | -0,306 | 0,013 Abcb6         |
| ENSMUSG00000024182   | 0,267 | 0,000 Axin1         | ENSMUSG00000069255 | -0,306 | 0,001 Dusp22        |
| ENSMUSG000000073982  | 0,266 | 0,049 Rhog          | ENSMUSG00000030766 | -0,307 | 0,013 Arhgap17      |
| ENSMUSG00000029146   | 0,266 | 0,013 Snx17         | ENSMUSG00000034006 | -0,308 | 0,013 Pqlc1         |
| ENSMUSG00000003131   | 0,266 | 0,001 Pafah1b2      | ENSMUSG00000062590 | -0,309 | 0,030 Armc9         |
| ENSMUSG00000020225   | 0,265 | 0,040 Tmbim4        | ENSMUSG00000024588 | -0,310 | 0,000 Fech          |
| ENSMUSG00000004069   | 0,264 | 0,000 Dnaja3        | ENSMUSG00000078517 | -0,311 | 0,028 Emc1          |
| ENSMUSG00000032423   | 0,264 | 0,036 Syncrip       | ENSMUSG00000035790 | -0,311 | 0,048 Cep19         |
| ENSMUSG00000013089   | 0,264 | 0,041 Etv5          | ENSMUSG00000060376 | -0,311 | 0,029 Bckdha        |
| ENSMUSG000000029777  | 0,264 | 0,033 Gars          | ENSMUSG00000006920 | -0,312 | 0,020 Ezh1          |
| ENSMUSG00000026353   | 0,264 | 0,001 Ubxn4         | ENSMUSG00000030802 | -0,312 | 0,007 Bckdk         |
| ENSMUSG00000027429   | 0,264 | 0,019 Sec23b        | ENSMUSG00000027198 | -0,313 | 0,000 Ext2          |
| ENSMUSG00000030341   | 0,263 | 0,003 Tnfrsf1a      | ENSMUSG00000002031 | -0,314 | 0,031 Ift46         |
| ENSMUSG000000070643  | 0,263 | 0,048 Sox13         | ENSMUSG00000022106 | -0,314 | 0,021 Rcbtb2        |
| ENSMUSG00000070934   | 0,263 | 0,018 Rraga         | ENSMUSG00000041654 | -0,314 | 0,013 Slc39a11      |
| ENSMUSG00000028330   | 0,262 | 0,002 Ncbp1         | ENSMUSG00000029047 | -0,315 | 0,034 Pex10         |
| ENSMUSG000000049792  | 0,262 | 0,026 Bag5          | ENSMUSG00000053128 | -0,315 | 0,008 Rnf26         |
| ENSMUSG00000022500   | 0,262 | 0,018 Litaf         | ENSMUSG00000022369 | -0,316 | 0,003 Mtbp          |
| ENSMUSG00000035575   | 0,261 | 0,024 Utp6          | ENSMUSG00000003031 | -0,316 | 0,022 Cdkn1b        |
| ENSMUSG00000010755   | 0,261 | 0,044 Cars          | ENSMUSG00000071454 | -0,316 | 0,034 Dtnb          |
| ENSMUSG00000022682   | 0,261 | 0,005 Rrn3          | ENSMUSG00000020973 | -0,316 | 0,009 Dnaaf2        |
| ENSMUSG00000054277   | 0,260 | 0,035 Arfgap3       | ENSMUSG00000063052 | -0,317 | 0,005 Lrrc40        |
| ENSMUSG00000003234   | 0,260 | 0,005 Abcf3         | ENSMUSG00000028057 | -0,317 | 0,013 Rit1          |
| ENSMUSG0000000061130 | 0,260 | 0,037 Ppm1b         | ENSMUSG00000034875 | -0,318 | 0,019 Nudt19        |
| ENSMUSG00000020923   | 0,259 | 0,000 Ubtf          | ENSMUSG00000034341 | -0,319 | 0,000 Wbp2          |
| ENSMUSG00000034252   | 0,259 | 0,001 Senp6         | ENSMUSG00000041625 | -0,320 | 0,048 Ggact         |
| ENSMUSG000000031950  | 0,259 | 0,048 Gabarapl2     | ENSMUSG00000050989 | -0,320 | 0,003 Selenon       |

|                     |       |                |                    |        |               |
|---------------------|-------|----------------|--------------------|--------|---------------|
| ENSMUSG00000033161  | 0,259 | 0,002 Atp1a1   | ENSMUSG00000029428 | -0,321 | 0,000 Stx2    |
| ENSMUSG00000038976  | 0,259 | 0,007 Ppp1r9b  | ENSMUSG00000001942 | -0,322 | 0,046 Siae    |
| ENSMUSG00000036002  | 0,259 | 0,006 Fam214b  | ENSMUSG00000046949 | -0,323 | 0,002 Nqo2    |
| ENSMUSG00000001569  | 0,258 | 0,003 Nom1     | ENSMUSG00000029676 | -0,324 | 0,002 Pot1a   |
| ENSMUSG00000034211  | 0,258 | 0,012 Mrps17   | ENSMUSG00000021179 | -0,324 | 0,033 Nrde2   |
| ENSMUSG00000068039  | 0,258 | 0,009 Tcp1     | ENSMUSG00000032959 | -0,324 | 0,046 Pebp1   |
| ENSMUSG00000014601  | 0,257 | 0,000 Strip1   | ENSMUSG00000020652 | -0,325 | 0,008 Cenpo   |
| ENSMUSG00000025373  | 0,257 | 0,028 Rnf41    | ENSMUSG00000056204 | -0,325 | 0,001 Pgpep1  |
| ENSMUSG000000061950 | 0,257 | 0,039 Ppp4r1   | ENSMUSG00000037461 | -0,325 | 0,017 Ints7   |
| ENSMUSG00000032577  | 0,257 | 0,039 Mapkapk3 | ENSMUSG00000040913 | -0,325 | 0,034 Fbxw4   |
| ENSMUSG00000023110  | 0,256 | 0,002 Prmt5    | ENSMUSG00000028096 | -0,327 | 0,007 Gpr89   |
| ENSMUSG00000032020  | 0,256 | 0,041 Ubash3b  | ENSMUSG00000031776 | -0,328 | 0,004 Arl2bp  |
| ENSMUSG00000074088  | 0,256 | 0,023 Snrnp40  | ENSMUSG00000028621 | -0,328 | 0,004 Cyb5rl  |
| ENSMUSG00000024404  | 0,256 | 0,021 Riok3    | ENSMUSG00000029434 | -0,329 | 0,039 Vps33a  |
| ENSMUSG00000026889  | 0,256 | 0,001 Rbm18    | ENSMUSG00000037257 | -0,330 | 0,005 Aagab   |
| ENSMUSG000000067713 | 0,256 | 0,040 Prkag1   | ENSMUSG00000047766 | -0,330 | 0,003 Lrrc49  |
| ENSMUSG00000023075  | 0,256 | 0,002 Akirin1  | ENSMUSG00000022553 | -0,330 | 0,004 Maf1    |
| ENSMUSG00000026289  | 0,254 | 0,008 Atg16l1  | ENSMUSG00000021481 | -0,331 | 0,014 Zfp346  |
| ENSMUSG00000024683  | 0,254 | 0,033 Mrpl16   | ENSMUSG00000053436 | -0,332 | 0,000 Mapk14  |
| ENSMUSG00000045795  | 0,254 | 0,004 Whamm    | ENSMUSG00000009828 | -0,333 | 0,001 Ick     |
| ENSMUSG00000021621  | 0,253 | 0,005 Zcchc9   | ENSMUSG00000035722 | -0,333 | 0,014 Abca7   |
| ENSMUSG00000020720  | 0,252 | 0,029 Psmc12   | ENSMUSG00000032594 | -0,333 | 0,006 Ip6k1   |
| ENSMUSG000000033285 | 0,252 | 0,020 Wdr3     | ENSMUSG00000031198 | -0,334 | 0,000 Fundc2  |
| ENSMUSG00000044600  | 0,251 | 0,022 Smim7    | ENSMUSG00000079109 | -0,335 | 0,000 Pms2    |
| ENSMUSG00000020132  | 0,251 | 0,011 Rab21    | ENSMUSG00000031835 | -0,336 | 0,001 Mbtps1  |
| ENSMUSG00000014349  | 0,250 | 0,000 Ube2z    | ENSMUSG00000027180 | -0,336 | 0,026 Fbxo3   |
| ENSMUSG00000044857  | 0,250 | 0,020 Lemd2    | ENSMUSG00000022125 | -0,336 | 0,016 Cln5    |
| ENSMUSG00000038982  | 0,250 | 0,019 Bloc1s5  | ENSMUSG00000040272 | -0,338 | 0,021 Accs    |
| ENSMUSG00000021814  | 0,250 | 0,033 Anxa7    | ENSMUSG00000020823 | -0,339 | 0,000 Sec1411 |
| ENSMUSG000000023044 | 0,249 | 0,002 Csad     | ENSMUSG00000027963 | -0,340 | 0,006 Extl2   |
| ENSMUSG00000030619  | 0,248 | 0,038 Eed      | ENSMUSG00000037656 | -0,340 | 0,018 Slc20a2 |
| ENSMUSG00000015776  | 0,248 | 0,005 Med22    | ENSMUSG00000039958 | -0,341 | 0,018 Etfbkmt |
| ENSMUSG00000027852  | 0,248 | 0,001 Nras     | ENSMUSG00000099481 | -0,342 | 0,003 Xndc1   |
| ENSMUSG00000047731  | 0,247 | 0,000 Wbp1l    | ENSMUSG00000037415 | -0,343 | 0,002 Ranbp10 |
| ENSMUSG00000026095  | 0,246 | 0,005 Asnsd1   | ENSMUSG00000006850 | -0,343 | 0,014 Tmco6   |
| ENSMUSG00000028961  | 0,246 | 0,005 Pgd      | ENSMUSG00000026179 | -0,344 | 0,001 Pnk1    |
| ENSMUSG000000041426 | 0,246 | 0,029 Hibch    | ENSMUSG00000048232 | -0,346 | 0,021 Fbxo10  |
| ENSMUSG00000025872  | 0,245 | 0,048 Thoc3    | ENSMUSG00000000751 | -0,347 | 0,000 Rpa1    |
| ENSMUSG00000026279  | 0,245 | 0,039 Thap4    | ENSMUSG00000006728 | -0,347 | 0,008 Cdk4    |
| ENSMUSG00000040463  | 0,245 | 0,013 Mybbp1a  | ENSMUSG00000031546 | -0,347 | 0,011 Gins4   |
| ENSMUSG00000045576  | 0,245 | 0,029 St7l     | ENSMUSG00000081534 | -0,348 | 0,000 Slc48a1 |
| ENSMUSG00000028161  | 0,245 | 0,001 Ppp3ca   | ENSMUSG00000026134 | -0,349 | 0,002 Prim2   |
| ENSMUSG00000047832  | 0,244 | 0,004 Cdca4    | ENSMUSG00000029186 | -0,349 | 0,007 Pi4k2b  |
| ENSMUSG000000063785 | 0,244 | 0,005 Utp14a   | ENSMUSG00000049657 | -0,353 | 0,022 Zbtb5   |
| ENSMUSG00000003348  | 0,244 | 0,013 Mob3a    | ENSMUSG00000053134 | -0,353 | 0,004 Supt7l  |
| ENSMUSG00000056941  | 0,243 | 0,039 Commd7   | ENSMUSG00000033983 | -0,355 | 0,025 Coil    |
| ENSMUSG00000030168  | 0,243 | 0,011 Adipor2  | ENSMUSG00000029191 | -0,356 | 0,001 Rfc1    |

|                     |       |                |                    |        |                     |
|---------------------|-------|----------------|--------------------|--------|---------------------|
| ENSMUSG00000015714  | 0,243 | 0,000 Cers2    | ENSMUSG00000020534 | -0,356 | 0,046 Shmt1         |
| ENSMUSG00000006390  | 0,242 | 0,012 Elovl1   | ENSMUSG00000025486 | -0,356 | 0,037 Sirt3         |
| ENSMUSG00000038697  | 0,242 | 0,017 Taf5l    | ENSMUSG00000021975 | -0,357 | 0,000 Ints9         |
| ENSMUSG00000044147  | 0,242 | 0,003 Arf6     | ENSMUSG00000024158 | -0,357 | 0,029 Hagh          |
| ENSMUSG00000024219  | 0,241 | 0,047 Anks1    | ENSMUSG00000043067 | -0,358 | 0,043 Dpy191l       |
| ENSMUSG00000025024  | 0,241 | 0,005 Smndc1   | ENSMUSG00000043065 | -0,358 | 0,014 Spice1        |
| ENSMUSG00000008475  | 0,241 | 0,025 Arpc5    | ENSMUSG00000068115 | -0,359 | 0,007 Ninl          |
| ENSMUSG00000026864  | 0,241 | 0,029 Hspa5    | ENSMUSG00000041000 | -0,362 | 0,006 Trim62        |
| ENSMUSG000000028420 | 0,240 | 0,031 Tmem38b  | ENSMUSG00000009905 | -0,362 | 0,000 Kdsr          |
| ENSMUSG00000022378  | 0,240 | 0,015 Fam49b   | ENSMUSG00000022978 | -0,363 | 0,009 Mis18a        |
| ENSMUSG00000048439  | 0,239 | 0,049 Nupl2    | ENSMUSG00000038860 | -0,363 | 0,009 Garnl3        |
| ENSMUSG00000019777  | 0,239 | 0,050 Hdac2    | ENSMUSG00000022420 | -0,364 | 0,002 Dnal4         |
| ENSMUSG00000020612  | 0,238 | 0,002 Prkar1a  | ENSMUSG00000025648 | -0,365 | 0,011 Pfkfb4        |
| ENSMUSG00000025980  | 0,238 | 0,014 Hspd1    | ENSMUSG00000037419 | -0,365 | 0,041 Endod1        |
| ENSMUSG0000004897   | 0,238 | 0,005 Hdgf     | ENSMUSG00000035266 | -0,365 | 0,002 Helq          |
| ENSMUSG000000028719 | 0,238 | 0,045 Cmpk1    | ENSMUSG00000058997 | -0,365 | 0,027 Vwa8          |
| ENSMUSG00000031467  | 0,238 | 0,010 Agpat5   | ENSMUSG00000002814 | -0,365 | 0,025 Top3a         |
| ENSMUSG00000021385  | 0,237 | 0,049 Ippk     | ENSMUSG00000021483 | -0,366 | 0,003 Cdk20         |
| ENSMUSG00000042426  | 0,237 | 0,038 Dhx29    | ENSMUSG00000041346 | -0,366 | 0,012 Wrap53        |
| ENSMUSG000000028165 | 0,237 | 0,004 Cisd2    | ENSMUSG00000050530 | -0,367 | 0,040 Fam171a1      |
| ENSMUSG00000012422  | 0,236 | 0,044 Tmem167  | ENSMUSG00000019813 | -0,367 | 0,010 Cep57l1       |
| ENSMUSG00000035152  | 0,236 | 0,011 Ap2b1    | ENSMUSG00000040618 | -0,367 | 0,043 Pck2          |
| ENSMUSG000000047123 | 0,235 | 0,047 Ticam1   | ENSMUSG00000025151 | -0,367 | 0,000 Maged1        |
| ENSMUSG00000021610  | 0,234 | 0,000 Clptm1l  | ENSMUSG00000035877 | -0,368 | 0,010 Zhx3          |
| ENSMUSG00000024668  | 0,234 | 0,045 Sdhaf2   | ENSMUSG00000036882 | -0,369 | 0,035 Arhgap33      |
| ENSMUSG00000029534  | 0,234 | 0,011 St7      | ENSMUSG00000033970 | -0,369 | 0,013 Rfc3          |
| ENSMUSG00000021266  | 0,234 | 0,001 Wars     | ENSMUSG00000019338 | -0,369 | 0,047 Zfp687        |
| ENSMUSG00000000561  | 0,233 | 0,012 Wdr77    | ENSMUSG00000055200 | -0,370 | 0,007 Sertad3       |
| ENSMUSG00000031715  | 0,233 | 0,045 Smarca5  | ENSMUSG00000022244 | -0,370 | 0,007 Amacr         |
| ENSMUSG000000030682 | 0,232 | 0,011 Cdipt    | ENSMUSG00000062661 | -0,370 | 0,022 Ncs1          |
| ENSMUSG00000051934  | 0,232 | 0,000 Spats2   | ENSMUSG00000038637 | -0,372 | 0,018 Lrrc56        |
| ENSMUSG00000025156  | 0,232 | 0,001 Gps1     | ENSMUSG00000021120 | -0,372 | 0,007 Pigh          |
| ENSMUSG00000057522  | 0,231 | 0,030 Spop     | ENSMUSG00000056698 | -0,372 | 0,002 Elmod3        |
| ENSMUSG00000022556  | 0,231 | 0,025 Hsf1     | ENSMUSG00000033059 | -0,373 | 0,001 Pygb          |
| ENSMUSG00000028833  | 0,231 | 0,007 Ncdn     | ENSMUSG00000038368 | -0,373 | 0,013 Focad         |
| ENSMUSG00000022052  | 0,231 | 0,032 Ppp2r2a  | ENSMUSG00000007338 | -0,373 | 0,014 Mrpl49        |
| ENSMUSG000000024535 | 0,230 | 0,018 Snx24    | ENSMUSG00000052949 | -0,373 | 0,012 Rnf157        |
| ENSMUSG00000022817  | 0,230 | 0,032 Itgb5    | ENSMUSG00000059040 | -0,374 | 0,041 Eno1b         |
| ENSMUSG00000031532  | 0,230 | 0,038 Saraf    | ENSMUSG00000068264 | -0,374 | 0,007 Ap5s1         |
| ENSMUSG00000031913  | 0,229 | 0,001 Vps4a    | ENSMUSG00000029687 | -0,375 | 0,000 Ezh2          |
| ENSMUSG00000017760  | 0,229 | 0,031 Ctsa     | ENSMUSG00000035401 | -0,376 | 0,001 Emsy          |
| ENSMUSG00000038459  | 0,229 | 0,005 Abhd17c  | ENSMUSG00000018548 | -0,376 | 0,029 Trim37        |
| ENSMUSG00000098923  | 0,229 | 0,027 Tmem185b | ENSMUSG00000040312 | -0,376 | 0,041 Cchcr1        |
| ENSMUSG000000037935 | 0,229 | 0,012 Smarce1  | ENSMUSG00000026421 | -0,377 | 0,035 Csrp1         |
| ENSMUSG00000071652  | 0,229 | 0,007 Ints5    | ENSMUSG00000025235 | -0,378 | 0,001 Bbs4          |
| ENSMUSG00000010554  | 0,228 | 0,017 Mettl16  | ENSMUSG00000021252 | -0,378 | 0,000 Erg28         |
| ENSMUSG00000063888  | 0,228 | 0,011 Rpl7l1   | ENSMUSG00000087174 | -0,378 | 0,009 5530601H04Rik |

|                     |       |                |                    |        |                |
|---------------------|-------|----------------|--------------------|--------|----------------|
| ENSMUSG00000040782  | 0,228 | 0,024 Rfwd2    | ENSMUSG00000036957 | -0,379 | 0,004 Lrfn3    |
| ENSMUSG00000028879  | 0,228 | 0,013 Stx12    | ENSMUSG00000039914 | -0,380 | 0,034 Coq10a   |
| ENSMUSG00000019173  | 0,228 | 0,000 Rab5c    | ENSMUSG00000039936 | -0,380 | 0,027 Pik3cd   |
| ENSMUSG00000021096  | 0,227 | 0,000 Ppm1a    | ENSMUSG00000031787 | -0,380 | 0,000 Katnb1   |
| ENSMUSG00000025364  | 0,226 | 0,035 Pa2g4    | ENSMUSG00000034522 | -0,381 | 0,038 Zfp395   |
| ENSMUSG00000035517  | 0,226 | 0,046 Tdrd7    | ENSMUSG00000033124 | -0,381 | 0,000 Atg9a    |
| ENSMUSG00000022855  | 0,226 | 0,009 Senp2    | ENSMUSG00000039747 | -0,382 | 0,046 Orai2    |
| ENSMUSG00000029364  | 0,225 | 0,008 Wsb2     | ENSMUSG00000000693 | -0,382 | 0,004 Loxl3    |
| ENSMUSG000000056305 | 0,224 | 0,018 Usp39    | ENSMUSG00000039382 | -0,382 | 0,007 Wdr45    |
| ENSMUSG00000062397  | 0,224 | 0,023 Zfp706   | ENSMUSG00000022221 | -0,383 | 0,004 Ripk3    |
| ENSMUSG00000026926  | 0,224 | 0,000 Pmpca    | ENSMUSG00000032192 | -0,384 | 0,006 Gnb5     |
| ENSMUSG00000021694  | 0,223 | 0,035 Ercc8    | ENSMUSG00000000378 | -0,384 | 0,005 Ccm2     |
| ENSMUSG00000016528  | 0,223 | 0,029 Mapkapk2 | ENSMUSG00000035891 | -0,386 | 0,004 Cerk     |
| ENSMUSG00000046707  | 0,223 | 0,000 Csnk2a2  | ENSMUSG00000000876 | -0,388 | 0,000 Pxmp4    |
| ENSMUSG00000011257  | 0,223 | 0,001 Pabpc4   | ENSMUSG00000024773 | -0,388 | 0,014 Atg2a    |
| ENSMUSG000000029518 | 0,223 | 0,000 Rab35    | ENSMUSG00000039050 | -0,388 | 0,000 Osbpl2   |
| ENSMUSG00000024527  | 0,223 | 0,000 Afg3l2   | ENSMUSG00000037526 | -0,389 | 0,019 Atg14    |
| ENSMUSG00000042079  | 0,222 | 0,001 Hnrnpf   | ENSMUSG00000024590 | -0,389 | 0,001 Lmnb1    |
| ENSMUSG00000079562  | 0,222 | 0,000 Maea     | ENSMUSG00000044629 | -0,389 | 0,000 Cnrip1   |
| ENSMUSG00000039682  | 0,222 | 0,001 Lap3     | ENSMUSG00000033126 | -0,390 | 0,045 Ybey     |
| ENSMUSG00000011179  | 0,222 | 0,031 Odc1     | ENSMUSG00000025190 | -0,391 | 0,000 Got1     |
| ENSMUSG0000003062   | 0,221 | 0,045 Stard3nl | ENSMUSG00000027244 | -0,391 | 0,000 Atg13    |
| ENSMUSG000000039756 | 0,221 | 0,004 Dnttip2  | ENSMUSG00000027342 | -0,391 | 0,000 Pcna     |
| ENSMUSG00000023353  | 0,221 | 0,025 Agap3    | ENSMUSG00000021286 | -0,392 | 0,002 Zfyve21  |
| ENSMUSG00000014867  | 0,221 | 0,000 Surf4    | ENSMUSG00000035776 | -0,392 | 0,000 Cd99l2   |
| ENSMUSG00000023010  | 0,220 | 0,000 Tmbim6   | ENSMUSG00000050144 | -0,393 | 0,003 Slc25a44 |
| ENSMUSG00000027170  | 0,220 | 0,041 Eif3m    | ENSMUSG00000039693 | -0,394 | 0,027 Msantd3  |
| ENSMUSG00000028409  | 0,220 | 0,033 Smu1     | ENSMUSG00000058486 | -0,396 | 0,000 Wdr91    |
| ENSMUSG00000058704  | 0,219 | 0,014 Memo1    | ENSMUSG00000025791 | -0,398 | 0,000 Pgm2     |
| ENSMUSG000000021428 | 0,218 | 0,002 Rlok1    | ENSMUSG00000001270 | -0,398 | 0,027 Ckb      |
| ENSMUSG00000028343  | 0,218 | 0,011 Erp44    | ENSMUSG00000021594 | -0,400 | 0,007 Srd5a1   |
| ENSMUSG00000038416  | 0,218 | 0,021 Cdc16    | ENSMUSG00000013629 | -0,401 | 0,020 Cad      |
| ENSMUSG00000022472  | 0,218 | 0,002 Desi1    | ENSMUSG00000029998 | -0,401 | 0,015 Pcyox1   |
| ENSMUSG000000059439 | 0,218 | 0,010 Bcas3    | ENSMUSG00000020766 | -0,402 | 0,040 Galk1    |
| ENSMUSG00000036371  | 0,217 | 0,003 Serbp1   | ENSMUSG00000022885 | -0,402 | 0,003 St6gal1  |
| ENSMUSG00000029528  | 0,217 | 0,020 Pxn      | ENSMUSG00000028675 | -0,403 | 0,000 Pnrc2    |
| ENSMUSG000000066148 | 0,217 | 0,037 Prpf4    | ENSMUSG00000004085 | -0,403 | 0,046 Map3k20  |
| ENSMUSG00000034889  | 0,216 | 0,025 Cactin   | ENSMUSG00000042476 | -0,404 | 0,008 Abcb4    |
| ENSMUSG00000062937  | 0,216 | 0,050 Mtap     | ENSMUSG00000030530 | -0,404 | 0,031 Furin    |
| ENSMUSG00000033706  | 0,216 | 0,025 Smyd5    | ENSMUSG00000021185 | -0,404 | 0,011 Dglucy   |
| ENSMUSG00000001687  | 0,216 | 0,027 Ubi3     | ENSMUSG00000028199 | -0,406 | 0,004 Cryz     |
| ENSMUSG00000027804  | 0,216 | 0,034 Ppid     | ENSMUSG00000029521 | -0,407 | 0,005 Chek2    |
| ENSMUSG00000031916  | 0,215 | 0,006 Cog8     | ENSMUSG00000032652 | -0,408 | 0,015 Crebl2   |
| ENSMUSG000000033793 | 0,215 | 0,012 Atp6v1h  | ENSMUSG00000032086 | -0,408 | 0,047 Bace1    |
| ENSMUSG00000069520  | 0,215 | 0,000 Tmem19   | ENSMUSG00000010307 | -0,409 | 0,006 Tmem86a  |
| ENSMUSG00000009291  | 0,215 | 0,041 Pttg1ip  | ENSMUSG00000026360 | -0,409 | 0,044 Rgs2     |
| ENSMUSG00000027361  | 0,215 | 0,005 Gabpb1   | ENSMUSG00000022773 | -0,411 | 0,046 Ypel1    |



|                     |       |               |                     |        |                 |
|---------------------|-------|---------------|---------------------|--------|-----------------|
| ENSMUSG00000022175  | 0,215 | 0,001 Lrp10   | ENSMUSG00000071547  | -0,412 | 0,009 Nt5dc2    |
| ENSMUSG00000026254  | 0,215 | 0,034 Eif4e2  | ENSMUSG00000066357  | -0,413 | 0,000 Wdr6      |
| ENSMUSG00000003518  | 0,214 | 0,028 Dusp3   | ENSMUSG00000041161  | -0,413 | 0,011 Otud3     |
| ENSMUSG00000028745  | 0,214 | 0,036 Capzb   | ENSMUSG00000023345  | -0,413 | 0,006 Poc1a     |
| ENSMUSG00000000827  | 0,214 | 0,006 Tpd52l2 | ENSMUSG00000000278  | -0,415 | 0,000 Scpep1    |
| ENSMUSG000000031931 | 0,213 | 0,031 Ankrd49 | ENSMUSG000000038520 | -0,415 | 0,017 Tbc1d17   |
| ENSMUSG000000037013 | 0,213 | 0,048 Ss18    | ENSMUSG00000024833  | -0,415 | 0,000 Pola2     |
| ENSMUSG00000028538  | 0,213 | 0,049 St3gal3 | ENSMUSG00000022428  | -0,415 | 0,016 Cby1      |
| ENSMUSG000000038848 | 0,212 | 0,018 Ythdf1  | ENSMUSG000000038776 | -0,415 | 0,015 Ephx1     |
| ENSMUSG000000038503 | 0,212 | 0,001 Mesd    | ENSMUSG000000109493 | -0,416 | 0,000 Gm45208   |
| ENSMUSG00000029291  | 0,212 | 0,000 Rufy3   | ENSMUSG00000003546  | -0,417 | 0,000 Klc4      |
| ENSMUSG00000024927  | 0,211 | 0,033 Rela    | ENSMUSG00000048200  | -0,418 | 0,043 Cracr2b   |
| ENSMUSG00000024816  | 0,211 | 0,023 Frmd8   | ENSMUSG00000025289  | -0,422 | 0,027 Prdx4     |
| ENSMUSG000000031575 | 0,211 | 0,000 Ash2l   | ENSMUSG00000050394  | -0,422 | 0,020 Armcx6    |
| ENSMUSG00000026878  | 0,211 | 0,023 Rab14   | ENSMUSG00000063439  | -0,422 | 0,029 B9d2      |
| ENSMUSG000000068267 | 0,211 | 0,034 Cenpb   | ENSMUSG000000029463 | -0,422 | 0,015 Fam216a   |
| ENSMUSG000000057858 | 0,210 | 0,029 Fam204a | ENSMUSG000000031134 | -0,423 | 0,000 RbmX      |
| ENSMUSG00000000346  | 0,210 | 0,001 Dazap2  | ENSMUSG00000022679  | -0,424 | 0,039 Mpv17l    |
| ENSMUSG000000019795 | 0,209 | 0,003 Pcmt1   | ENSMUSG00000027163  | -0,424 | 0,015 Commd9    |
| ENSMUSG000000025609 | 0,209 | 0,049 MklN1   | ENSMUSG00000074738  | -0,425 | 0,002 Fndc10    |
| ENSMUSG00000003037  | 0,209 | 0,048 Rab8a   | ENSMUSG00000027984  | -0,425 | 0,000 Hadh      |
| ENSMUSG00000005803  | 0,208 | 0,017 Sqor    | ENSMUSG00000020105  | -0,426 | 0,030 Lrig3     |
| ENSMUSG000000040462 | 0,207 | 0,013 Os9     | ENSMUSG00000021811  | -0,428 | 0,002 Dnajc9    |
| ENSMUSG00000002741  | 0,207 | 0,000 Ykt6    | ENSMUSG00000039787  | -0,429 | 0,003 Cercam    |
| ENSMUSG000000061559 | 0,207 | 0,049 Wdr61   | ENSMUSG00000040675  | -0,430 | 0,024 Mthfd1l   |
| ENSMUSG000000020780 | 0,207 | 0,007 Srp68   | ENSMUSG00000026556  | -0,430 | 0,047 Vangl2    |
| ENSMUSG000000033335 | 0,207 | 0,005 Dnm2    | ENSMUSG00000035232  | -0,430 | 0,000 Pdk3      |
| ENSMUSG00000022285  | 0,206 | 0,048 Ywhaz   | ENSMUSG00000042606  | -0,431 | 0,005 Hirip3    |
| ENSMUSG00000025510  | 0,206 | 0,018 Cd151   | ENSMUSG00000049086  | -0,431 | 0,017 Bmyc      |
| ENSMUSG000000020680 | 0,206 | 0,014 Taf15   | ENSMUSG000000039686 | -0,432 | 0,000 Zer1      |
| ENSMUSG000000020076 | 0,206 | 0,002 Ddx50   | ENSMUSG00000041840  | -0,432 | 0,049 Haus1     |
| ENSMUSG00000046691  | 0,205 | 0,025 Chtf8   | ENSMUSG00000043419  | -0,432 | 0,048 Chd3os    |
| ENSMUSG000000020149 | 0,204 | 0,048 Rab1a   | ENSMUSG00000047067  | -0,433 | 0,046 Dusp28    |
| ENSMUSG000000015341 | 0,204 | 0,017 Golga7  | ENSMUSG00000002908  | -0,434 | 0,037 Kcnn1     |
| ENSMUSG00000027374  | 0,204 | 0,015 Mrps5   | ENSMUSG00000023079  | -0,435 | 0,004 Gtf2ird1  |
| ENSMUSG00000063334  | 0,204 | 0,001 Krr1    | ENSMUSG00000035885  | -0,436 | 0,041 Cox8a     |
| ENSMUSG000000030876 | 0,203 | 0,023 Mettl9  | ENSMUSG000000034317 | -0,436 | 0,026 Trim59    |
| ENSMUSG000000031987 | 0,202 | 0,000 EglN1   | ENSMUSG00000036880  | -0,436 | 0,001 Acaa2     |
| ENSMUSG00000029110  | 0,201 | 0,019 Rnf4    | ENSMUSG00000039197  | -0,436 | 0,000 Adk       |
| ENSMUSG000000064145 | 0,201 | 0,008 Arih2   | ENSMUSG00000024018  | -0,437 | 0,004 Ccdc167   |
| ENSMUSG000000031660 | 0,201 | 0,001 Brd7    | ENSMUSG00000040557  | -0,437 | 0,004 Mettl27   |
| ENSMUSG000000090213 | 0,201 | 0,001 Tmem189 | ENSMUSG00000048924  | -0,437 | 0,032 Ccdc125   |
| ENSMUSG00000001847  | 0,200 | 0,001 Rac1    | ENSMUSG00000029163  | -0,438 | 0,018 Emilin1   |
| ENSMUSG000000025793 | 0,200 | 0,003 Hgs     | ENSMUSG000000035172 | -0,439 | 0,000 Plekhh3   |
| ENSMUSG000000034254 | 0,200 | 0,016 Agpat1  | ENSMUSG000000030161 | -0,440 | 0,000 Gabarapl1 |
| ENSMUSG000000077450 | 0,199 | 0,013 Rab11b  | ENSMUSG000000057193 | -0,441 | 0,005 Slc44a2   |
| ENSMUSG000000005299 | 0,198 | 0,001 Letm1   | ENSMUSG000000052911 | -0,441 | 0,000 Lamb2     |

|                      |       |                     |                     |        |                |
|----------------------|-------|---------------------|---------------------|--------|----------------|
| ENSMUSG00000001175   | 0,197 | 0,020 Calm1         | ENSMUSG00000028394  | -0,441 | 0,000 Pole3    |
| ENSMUSG000000026356  | 0,197 | 0,016 Dars          | ENSMUSG00000024151  | -0,442 | 0,000 Msh2     |
| ENSMUSG000000035086  | 0,197 | 0,006 Becn1         | ENSMUSG00000047409  | -0,443 | 0,000 Ctdspl   |
| ENSMUSG000000068856  | 0,196 | 0,018 Sf3b4         | ENSMUSG00000036854  | -0,444 | 0,004 Hspb6    |
| ENSMUSG000000027634  | 0,196 | 0,050 NdrG3         | ENSMUSG00000024118  | -0,446 | 0,000 Tedc2    |
| ENSMUSG000000015290  | 0,196 | 0,002 Ubl4a         | ENSMUSG00000090115  | -0,446 | 0,031 Usp49    |
| ENSMUSG000000038563  | 0,196 | 0,015 Efl1          | ENSMUSG00000057229  | -0,447 | 0,002 Dmac2    |
| ENSMUSG000000034850  | 0,196 | 0,030 Tmem127       | ENSMUSG00000040746  | -0,447 | 0,003 Rnf167   |
| ENSMUSG000000020349  | 0,195 | 0,007 Ppp2ca        | ENSMUSG00000032411  | -0,447 | 0,007 Tfdp2    |
| ENSMUSG000000030082  | 0,195 | 0,001 Sec61a1       | ENSMUSG00000047205  | -0,449 | 0,043 Dusp18   |
| ENSMUSG00000006699   | 0,194 | 0,004 Cdc42         | ENSMUSG00000028933  | -0,449 | 0,001 Xrcc2    |
| ENSMUSG000000034274  | 0,194 | 0,018 Thoc5         | ENSMUSG00000023947  | -0,450 | 0,031 Nfkbie   |
| ENSMUSG000000032745  | 0,194 | 0,028 Gppb1         | ENSMUSG00000037894  | -0,453 | 0,001 H2afz    |
| ENSMUSG000000035596  | 0,193 | 0,024 Mboat7        | ENSMUSG00000041132  | -0,454 | 0,000 N4bp211  |
| ENSMUSG000000023944  | 0,193 | 0,006 Hsp90ab1      | ENSMUSG00000028044  | -0,454 | 0,028 Cks1b    |
| ENSMUSG000000006418  | 0,193 | 0,012 Rnf114        | ENSMUSG000000029863 | -0,455 | 0,020 Casp2    |
| ENSMUSG000000035772  | 0,193 | 0,022 Mrps2         | ENSMUSG00000041930  | -0,455 | 0,036 Fam222a  |
| ENSMUSG000000032123  | 0,193 | 0,018 Dpagt1        | ENSMUSG00000076437  | -0,456 | 0,045 Selenoh  |
| ENSMUSG000000047098  | 0,192 | 0,041 Rnf31         | ENSMUSG00000021306  | -0,456 | 0,006 Gpr137b  |
| ENSMUSG000000037376  | 0,190 | 0,044 Trmt6         | ENSMUSG00000001138  | -0,456 | 0,000 Cnnm3    |
| ENSMUSG000000023883  | 0,190 | 0,011 Phf10         | ENSMUSG00000037455  | -0,457 | 0,005 Slc18b1  |
| ENSMUSG00000004846   | 0,190 | 0,040 Plod3         | ENSMUSG00000021572  | -0,458 | 0,004 Cep72    |
| ENSMUSG0000000025162 | 0,190 | 0,011 Csnk1d        | ENSMUSG000000022844 | -0,458 | 0,009 Pdia5    |
| ENSMUSG000000028191  | 0,189 | 0,049 Bcl10         | ENSMUSG00000057137  | -0,458 | 0,033 Tmem140  |
| ENSMUSG000000030397  | 0,189 | 0,020 Mark4         | ENSMUSG00000030522  | -0,459 | 0,003 Mtmr10   |
| ENSMUSG000000036275  | 0,188 | 0,001 9530068E07Rik | ENSMUSG00000021226  | -0,459 | 0,001 Acot2    |
| ENSMUSG000000021504  | 0,188 | 0,033 B4galt7       | ENSMUSG00000037313  | -0,459 | 0,021 Tacc3    |
| ENSMUSG000000042901  | 0,187 | 0,028 Aida          | ENSMUSG00000021009  | -0,459 | 0,045 Ptpn21   |
| ENSMUSG000000031545  | 0,187 | 0,007 Gpat4         | ENSMUSG00000029455  | -0,459 | 0,001 Aldh2    |
| ENSMUSG0000000025027 | 0,185 | 0,017 Xpnpep1       | ENSMUSG00000034349  | -0,459 | 0,008 Smc4     |
| ENSMUSG000000099913  | 0,185 | 0,003 Gm28551       | ENSMUSG00000019124  | -0,460 | 0,005 Scrn1    |
| ENSMUSG000000027879  | 0,185 | 0,000 Sec22b        | ENSMUSG00000060548  | -0,461 | 0,044 Tnfrsf19 |
| ENSMUSG000000039630  | 0,185 | 0,016 Hnrmpu        | ENSMUSG00000026873  | -0,461 | 0,017 Phf19    |
| ENSMUSG000000028086  | 0,184 | 0,038 Fbxw7         | ENSMUSG00000064105  | -0,461 | 0,002 Cnnm2    |
| ENSMUSG000000032458  | 0,183 | 0,005 Copb2         | ENSMUSG00000029650  | -0,461 | 0,049 Slc46a3  |
| ENSMUSG000000035227  | 0,183 | 0,002 Spcs2         | ENSMUSG00000020888  | -0,464 | 0,000 Dvl2     |
| ENSMUSG0000000041130 | 0,182 | 0,006 Zfp598        | ENSMUSG000000032898 | -0,464 | 0,006 Fbxo21   |
| ENSMUSG000000036955  | 0,182 | 0,008 Kif1bp        | ENSMUSG00000028884  | -0,464 | 0,017 Rpa2     |
| ENSMUSG000000047719  | 0,182 | 0,018 Ubiad1        | ENSMUSG00000063605  | -0,464 | 0,020 Ccdc102a |
| ENSMUSG000000026127  | 0,182 | 0,000 Imp4          | ENSMUSG00000027669  | -0,465 | 0,004 Gnb4     |
| ENSMUSG000000002844  | 0,181 | 0,019 Adprh         | ENSMUSG00000034285  | -0,466 | 0,005 Nipsnap1 |
| ENSMUSG000000037373  | 0,181 | 0,010 Ctbp1         | ENSMUSG00000016637  | -0,466 | 0,039 Ift27    |
| ENSMUSG000000005813  | 0,180 | 0,004 Metap1        | ENSMUSG00000043487  | -0,467 | 0,027 Acot6    |
| ENSMUSG000000069237  | 0,180 | 0,024 Fam8a1        | ENSMUSG00000020883  | -0,468 | 0,004 Fbxl20   |
| ENSMUSG000000037706  | 0,179 | 0,005 Cd81          | ENSMUSG00000049904  | -0,468 | 0,022 Tmem17   |
| ENSMUSG000000024758  | 0,177 | 0,011 Rtn3          | ENSMUSG00000060288  | -0,469 | 0,023 Ppih     |
| ENSMUSG000000024604  | 0,177 | 0,001 Rbm22         | ENSMUSG00000022070  | -0,471 | 0,009 Bora     |



|                     |        |                |                    |        |                     |
|---------------------|--------|----------------|--------------------|--------|---------------------|
| ENSMUSG00000030374  | 0,177  | 0,007 Strn4    | ENSMUSG00000051950 | -0,472 | 0,005 B3glct        |
| ENSMUSG00000027465  | 0,175  | 0,016 Tbc1d20  | ENSMUSG00000020868 | -0,473 | 0,000 Xylt2         |
| ENSMUSG00000027706  | 0,175  | 0,029 Sec62    | ENSMUSG00000034247 | -0,473 | 0,000 Plekxm1       |
| ENSMUSG00000051695  | 0,174  | 0,006 Pcbp1    | ENSMUSG00000024696 | -0,474 | 0,002 Lpxn          |
| ENSMUSG00000025858  | 0,174  | 0,043 Get4     | ENSMUSG00000005949 | -0,474 | 0,000 Ctns          |
| ENSMUSG00000026869  | 0,173  | 0,036 Psmc5    | ENSMUSG00000033596 | -0,474 | 0,001 Rfwd3         |
| ENSMUSG00000060904  | 0,173  | 0,008 Arl1     | ENSMUSG00000046152 | -0,475 | 0,002 Fut10         |
| ENSMUSG00000037742  | 0,172  | 0,024 Eef1a1   | ENSMUSG00000025747 | -0,475 | 0,016 Tyms          |
| ENSMUSG000000027012 | 0,172  | 0,003 Dync1i2  | ENSMUSG00000034216 | -0,475 | 0,000 Vps18         |
| ENSMUSG00000048076  | 0,172  | 0,001 Arf1     | ENSMUSG00000056019 | -0,475 | 0,049 Zfp709        |
| ENSMUSG00000036112  | 0,172  | 0,026 Metap2   | ENSMUSG00000038967 | -0,475 | 0,000 Pdk2          |
| ENSMUSG00000023307  | 0,171  | 0,012 March5   | ENSMUSG00000035547 | -0,476 | 0,017 Capn5         |
| ENSMUSG00000054455  | 0,171  | 0,001 Vapb     | ENSMUSG00000051343 | -0,476 | 0,006 Rab11fip5     |
| ENSMUSG00000022426  | 0,170  | 0,036 Jost1    | ENSMUSG00000031974 | -0,476 | 0,003 Abcb10        |
| ENSMUSG00000020925  | 0,166  | 0,047 Ccdc43   | ENSMUSG00000040860 | -0,476 | 0,010 Crocc         |
| ENSMUSG000000020111 | 0,164  | 0,018 Micu1    | ENSMUSG00000025758 | -0,476 | 0,038 Plk4          |
| ENSMUSG00000030400  | 0,163  | 0,032 Ercc2    | ENSMUSG00000032397 | -0,476 | 0,001 Tipin         |
| ENSMUSG00000027425  | 0,163  | 0,030 Kat14    | ENSMUSG00000068299 | -0,478 | 0,007 Nat8f4        |
| ENSMUSG00000026223  | 0,161  | 0,036 Itih2c   | ENSMUSG00000005951 | -0,479 | 0,000 Shpk          |
| ENSMUSG00000039887  | 0,161  | 0,046 Alg14    | ENSMUSG00000071604 | -0,479 | 0,008 Fam189a2      |
| ENSMUSG00000029227  | 0,160  | 0,045 Fip1l1   | ENSMUSG00000031666 | -0,479 | 0,034 Rbl2          |
| ENSMUSG00000026426  | 0,160  | 0,010 Arl8a    | ENSMUSG00000000901 | -0,480 | 0,019 Mmp11         |
| ENSMUSG000000007815 | 0,158  | 0,003 Rhoa     | ENSMUSG00000028527 | -0,481 | 0,008 Ak4           |
| ENSMUSG00000042369  | 0,158  | 0,044 Rbm45    | ENSMUSG00000001151 | -0,482 | 0,032 Pcnt          |
| ENSMUSG00000029629  | 0,158  | 0,031 Phf14    | ENSMUSG00000023919 | -0,482 | 0,000 Cenpq         |
| ENSMUSG00000058407  | 0,155  | 0,027 Txnrc9   | ENSMUSG00000035351 | -0,483 | 0,013 Nup37         |
| ENSMUSG00000019087  | 0,155  | 0,007 Atp6ap1  | ENSMUSG00000027353 | -0,483 | 0,031 Mcm8          |
| ENSMUSG00000037669  | 0,145  | 0,039 Ldah     | ENSMUSG00000039316 | -0,483 | 0,000 Rftn1         |
| ENSMUSG00000024587  | 0,142  | 0,022 Nars     | ENSMUSG00000000253 | -0,484 | 0,011 Gmpr          |
| ENSMUSG000000027349 | 0,142  | 0,025 Fam98b   | ENSMUSG00000045268 | -0,484 | 0,031 Zfp691        |
| ENSMUSG00000032199  | 0,138  | 0,046 Polr2m   | ENSMUSG00000046027 | -0,485 | 0,000 Stard5        |
| ENSMUSG00000032435  | 0,136  | 0,048 Dync1li1 | ENSMUSG00000000056 | -0,487 | 0,000 Narf          |
| ENSMUSG00000025228  | 0,136  | 0,006 Actr1a   | ENSMUSG00000030086 | -0,487 | 0,048 Chchd6        |
| ENSMUSG00000007458  | 0,135  | 0,005 M6pr     | ENSMUSG00000042616 | -0,489 | 0,029 Oscp1         |
| ENSMUSG00000025130  | 0,134  | 0,047 P4hb     | ENSMUSG00000076435 | -0,489 | 0,012 Acsf2         |
| ENSMUSG00000062270  | 0,133  | 0,020 Morf411  | ENSMUSG00000037295 | -0,492 | 0,000 Ldlrap1       |
| ENSMUSG000000021484 | 0,133  | 0,031 Lman2    | ENSMUSG00000027864 | -0,492 | 0,016 Ptgfn         |
| ENSMUSG00000007411  | 0,132  | 0,021 Mark3    | ENSMUSG00000078794 | -0,493 | 0,001 Dact3         |
| ENSMUSG00000031447  | 0,132  | 0,012 Lamp1    | ENSMUSG00000065979 | -0,494 | 0,000 Cpped1        |
| ENSMUSG00000020936  | 0,130  | 0,025 Nmt1     | ENSMUSG00000014303 | -0,494 | 0,010 Glis2         |
| ENSMUSG00000001017  | 0,128  | 0,022 Chtop    | ENSMUSG00000024866 | -0,495 | 0,041 Acy3          |
| ENSMUSG00000017264  | 0,122  | 0,015 Exosc10  | ENSMUSG00000025277 | -0,495 | 0,000 Abhd6         |
| ENSMUSG00000059923  | 0,119  | 0,008 Grb2     | ENSMUSG00000028088 | -0,496 | 0,004 Fmo5          |
| ENSMUSG00000002981  | 0,096  | 0,049 Clptm1   | ENSMUSG00000107879 | -0,497 | 0,024 9330102E08Rik |
| ENSMUSG00000015165  | -0,138 | 0,043 Hnrnp1   | ENSMUSG00000022881 | -0,497 | 0,013 Rfc4          |
| ENSMUSG00000029247  | -0,144 | 0,007 Paics    | ENSMUSG00000018809 | -0,498 | 0,002 Smyd4         |
| ENSMUSG00000015889  | -0,160 | 0,034 Lta4h    | ENSMUSG00000048142 | -0,498 | 0,000 Nat8l         |

|                      |        |                     |                     |        |                     |
|----------------------|--------|---------------------|---------------------|--------|---------------------|
| ENSMUSG00000041133   | -0,161 | 0,040 Smc1a         | ENSMUSG00000030729  | -0,499 | 0,036 Pgm211        |
| ENSMUSG000000021193  | -0,162 | 0,045 Pitrm1        | ENSMUSG00000037235  | -0,499 | 0,000 Mxd4          |
| ENSMUSG000000040667  | -0,165 | 0,002 Nup88         | ENSMUSG00000032741  | -0,501 | 0,001 Tpcn1         |
| ENSMUSG000000062908  | -0,167 | 0,019 Acadm         | ENSMUSG00000089764  | -0,502 | 0,048 Gm16580       |
| ENSMUSG000000013833  | -0,167 | 0,036 Med16         | ENSMUSG00000020034  | -0,503 | 0,001 Tcp1112       |
| ENSMUSG000000030726  | -0,169 | 0,031 Pold3         | ENSMUSG00000028980  | -0,503 | 0,002 H6pd          |
| ENSMUSG000000078676  | -0,173 | 0,018 Casc3         | ENSMUSG00000019942  | -0,503 | 0,003 Cdk1          |
| ENSMUSG000000036980  | -0,174 | 0,040 Taf6          | ENSMUSG00000024168  | -0,504 | 0,015 Tmem204       |
| ENSMUSG000000039254  | -0,174 | 0,012 Pomt1         | ENSMUSG00000050107  | -0,505 | 0,000 Haspin        |
| ENSMUSG000000029012  | -0,177 | 0,049 Orc5          | ENSMUSG00000066894  | -0,507 | 0,005 Vsig10        |
| ENSMUSG00000000441   | -0,177 | 0,016 Raf1          | ENSMUSG00000029386  | -0,508 | 0,030 Tctn2         |
| ENSMUSG000000013646  | -0,184 | 0,037 Sh3bp5l       | ENSMUSG00000067199  | -0,508 | 0,028 Frat1         |
| ENSMUSG000000013787  | -0,184 | 0,000 Ehmt2         | ENSMUSG00000013495  | -0,508 | 0,005 Tmem175       |
| ENSMUSG000000024797  | -0,186 | 0,032 Vps51         | ENSMUSG000000101225 | -0,508 | 0,041 1700008J07Rik |
| ENSMUSG000000038225  | -0,187 | 0,049 Primpol       | ENSMUSG00000028073  | -0,509 | 0,003 Pear1         |
| ENSMUSG000000038838  | -0,191 | 0,028 Vars2         | ENSMUSG00000005615  | -0,510 | 0,002 Pcyt1a        |
| ENSMUSG000000020776  | -0,191 | 0,018 Fbf1          | ENSMUSG00000041777  | -0,510 | 0,005 Cir1          |
| ENSMUSG000000021115  | -0,192 | 0,026 Vrk1          | ENSMUSG00000022833  | -0,512 | 0,005 Ccdc14        |
| ENSMUSG000000017210  | -0,193 | 0,045 Med24         | ENSMUSG00000027330  | -0,512 | 0,006 Cdc25b        |
| ENSMUSG000000006526  | -0,193 | 0,048 Tmem110       | ENSMUSG00000028696  | -0,512 | 0,027 lpp           |
| ENSMUSG000000024096  | -0,195 | 0,004 Ralbp1        | ENSMUSG00000019845  | -0,512 | 0,013 Tube1         |
| ENSMUSG000000057367  | -0,195 | 0,006 Birc2         | ENSMUSG000000095930 | -0,513 | 0,016 Nim1k         |
| ENSMUSG000000030822  | -0,195 | 0,044 Prr14         | ENSMUSG00000020541  | -0,513 | 0,022 Tom111        |
| ENSMUSG000000043964  | -0,196 | 0,036 Orai3         | ENSMUSG00000027635  | -0,514 | 0,014 Dsn1          |
| ENSMUSG000000071647  | -0,196 | 0,021 Eml3          | ENSMUSG00000020532  | -0,515 | 0,001 Acaca         |
| ENSMUSG000000042032  | -0,196 | 0,006 Mat2b         | ENSMUSG00000043157  | -0,516 | 0,000 Arl11         |
| ENSMUSG000000005899  | -0,197 | 0,017 Smpd4         | ENSMUSG00000026944  | -0,516 | 0,017 Abca2         |
| ENSMUSG000000027709  | -0,198 | 0,007 Mccc1         | ENSMUSG00000022475  | -0,516 | 0,001 Hdac7         |
| ENSMUSG000000021240  | -0,198 | 0,038 Abcd4         | ENSMUSG00000022799  | -0,517 | 0,036 Arhgap31      |
| ENSMUSG0000000028291 | -0,198 | 0,026 Akirin2       | ENSMUSG000000038070 | -0,517 | 0,026 Cntlh         |
| ENSMUSG000000039599  | -0,199 | 0,007 Fam149b       | ENSMUSG00000035944  | -0,517 | 0,000 Ttc38         |
| ENSMUSG000000020375  | -0,199 | 0,015 Rufy1         | ENSMUSG00000056458  | -0,517 | 0,014 Mok           |
| ENSMUSG000000022678  | -0,199 | 0,018 Nde1          | ENSMUSG00000026317  | -0,519 | 0,001 Cln8          |
| ENSMUSG000000021900  | -0,199 | 0,005 Btd           | ENSMUSG00000030598  | -0,519 | 0,010 Fbxo17        |
| ENSMUSG000000027809  | -0,200 | 0,004 Etfdh         | ENSMUSG00000028066  | -0,519 | 0,015 Pmf1          |
| ENSMUSG000000087177  | -0,200 | 0,029 E130307A14Rik | ENSMUSG00000026489  | -0,520 | 0,001 Coq8a         |
| ENSMUSG000000035632  | -0,201 | 0,013 Cnot3         | ENSMUSG00000022673  | -0,520 | 0,000 Mcm4          |
| ENSMUSG000000028954  | -0,201 | 0,024 Nub1          | ENSMUSG00000025083  | -0,523 | 0,037 Afap112       |
| ENSMUSG000000022750  | -0,201 | 0,016 Klhl22        | ENSMUSG00000029086  | -0,524 | 0,012 Prom1         |
| ENSMUSG000000028646  | -0,203 | 0,034 Rragc         | ENSMUSG00000037020  | -0,524 | 0,000 Wdr62         |
| ENSMUSG000000029422  | -0,204 | 0,040 Rsrc2         | ENSMUSG00000021697  | -0,525 | 0,039 Depdc1b       |
| ENSMUSG000000026003  | -0,204 | 0,037 Acadl         | ENSMUSG00000027784  | -0,526 | 0,035 Ppm1l         |
| ENSMUSG000000013419  | -0,205 | 0,012 Zfp651        | ENSMUSG00000071064  | -0,526 | 0,007 Zfp827        |
| ENSMUSG000000046679  | -0,209 | 0,013 C87436        | ENSMUSG00000032586  | -0,526 | 0,001 Traip         |
| ENSMUSG000000036120  | -0,211 | 0,029 Rfxank        | ENSMUSG00000031478  | -0,527 | 0,004 Nek3          |
| ENSMUSG000000025188  | -0,211 | 0,015 Hps1          | ENSMUSG00000039347  | -0,527 | 0,000 Atp6v0e2      |
| ENSMUSG000000029033  | -0,212 | 0,036 Acap3         | ENSMUSG00000015944  | -0,527 | 0,000 Gatsl2        |

|                     |        |                  |                     |        |                     |
|---------------------|--------|------------------|---------------------|--------|---------------------|
| ENSMUSG00000021646  | -0,215 | 0,013 Mccc2      | ENSMUSG00000046157  | -0,528 | 0,002 Tmem229b      |
| ENSMUSG00000029781  | -0,216 | 0,018 Fkbp9      | ENSMUSG00000041809  | -0,529 | 0,031 Efhc1         |
| ENSMUSG00000026790  | -0,216 | 0,002 Odf2       | ENSMUSG00000002996  | -0,529 | 0,000 Hbp1          |
| ENSMUSG00000010110  | -0,216 | 0,040 Stx5a      | ENSMUSG00000027883  | -0,530 | 0,001 Gpsm2         |
| ENSMUSG000000031378 | -0,217 | 0,031 Abcd1      | ENSMUSG00000026456  | -0,530 | 0,008 Cyb5r1        |
| ENSMUSG000000032392 | -0,218 | 0,028 Parp16     | ENSMUSG00000023908  | -0,531 | 0,005 Pkmyt1        |
| ENSMUSG00000042709  | -0,218 | 0,018 Atpaf2     | ENSMUSG00000034685  | -0,531 | 0,002 Fam171a2      |
| ENSMUSG00000036622  | -0,218 | 0,014 Atp13a2    | ENSMUSG00000054717  | -0,531 | 0,002 Hmgb2         |
| ENSMUSG000000036188 | -0,219 | 0,006 Ankmy2     | ENSMUSG00000021719  | -0,532 | 0,002 Rgs7bp        |
| ENSMUSG00000002803  | -0,220 | 0,049 Btbd6      | ENSMUSG00000043262  | -0,534 | 0,027 Uevld         |
| ENSMUSG00000027198  | -0,221 | 0,000 Ext2       | ENSMUSG00000058290  | -0,534 | 0,003 Espl1         |
| ENSMUSG00000105053  | -0,221 | 0,016 Gm43064    | ENSMUSG00000041949  | -0,535 | 0,000 Tango6        |
| ENSMUSG000000021252 | -0,221 | 0,005 Erg28      | ENSMUSG00000022453  | -0,535 | 0,012 Naga          |
| ENSMUSG00000003038  | -0,222 | 0,033 Hmgn2      | ENSMUSG00000037890  | -0,537 | 0,020 Wdr19         |
| ENSMUSG00000042292  | -0,222 | 0,028 Mkl1       | ENSMUSG00000004891  | -0,537 | 0,001 Nes           |
| ENSMUSG000000028973 | -0,222 | 0,005 Abcb8      | ENSMUSG000000044317 | -0,538 | 0,039 Gpr4          |
| ENSMUSG00000028759  | -0,222 | 0,014 Hp1bp3     | ENSMUSG00000051098  | -0,538 | 0,042 Mblac2        |
| ENSMUSG00000063052  | -0,226 | 0,048 Lrrc40     | ENSMUSG00000033031  | -0,538 | 0,048 C330027C09Rik |
| ENSMUSG000000039536 | -0,227 | 0,013 Stau1      | ENSMUSG00000063804  | -0,539 | 0,008 Lin28b        |
| ENSMUSG000000030347 | -0,228 | 0,049 D6Wsu163e  | ENSMUSG00000035863  | -0,540 | 0,000 Palm          |
| ENSMUSG000000091512 | -0,229 | 0,038 Lamtor3    | ENSMUSG00000031767  | -0,540 | 0,013 Nudt7         |
| ENSMUSG00000115018  | -0,230 | 0,037 AL732309.1 | ENSMUSG00000041406  | -0,541 | 0,001 BC055324      |
| ENSMUSG000000019961 | -0,230 | 0,024 Tmpo       | ENSMUSG000000006800 | -0,541 | 0,004 Sulf2         |
| ENSMUSG000000093445 | -0,231 | 0,047 Lrch4      | ENSMUSG00000034586  | -0,541 | 0,031 Hid1          |
| ENSMUSG00000032952  | -0,231 | 0,005 Ap4b1      | ENSMUSG00000006678  | -0,541 | 0,026 Pola1         |
| ENSMUSG000000021000 | -0,231 | 0,048 Ctage5     | ENSMUSG00000055240  | -0,544 | 0,008 Zfp101        |
| ENSMUSG000000026554 | -0,232 | 0,001 Dcaf8      | ENSMUSG00000038332  | -0,544 | 0,000 Sesn1         |
| ENSMUSG00000041890  | -0,232 | 0,019 Git2       | ENSMUSG00000047003  | -0,545 | 0,020 Zfp41         |
| ENSMUSG00000022185  | -0,232 | 0,010 Acin1      | ENSMUSG00000027875  | -0,546 | 0,020 Hmgcs2        |
| ENSMUSG000000027890 | -0,232 | 0,047 Gstm4      | ENSMUSG00000014164  | -0,546 | 0,021 Kih3          |
| ENSMUSG00000012296  | -0,232 | 0,013 Tjap1      | ENSMUSG00000002068  | -0,546 | 0,021 Ccne1         |
| ENSMUSG00000059981  | -0,233 | 0,045 Taok2      | ENSMUSG00000073434  | -0,546 | 0,001 Wdr90         |
| ENSMUSG000000031864 | -0,234 | 0,002 Ints10     | ENSMUSG00000019823  | -0,548 | 0,000 Mical1        |
| ENSMUSG000000031508 | -0,234 | 0,015 Ankrd10    | ENSMUSG00000021186  | -0,548 | 0,007 Fbln5         |
| ENSMUSG00000020451  | -0,235 | 0,010 Limk2      | ENSMUSG00000029401  | -0,551 | 0,032 Rilpl2        |
| ENSMUSG00000011832  | -0,236 | 0,008 Evi5l      | ENSMUSG00000001864  | -0,553 | 0,006 Aif1l         |
| ENSMUSG000000037965 | -0,236 | 0,037 Zc3h7a     | ENSMUSG000000036249 | -0,554 | 0,000 Rbm43         |
| ENSMUSG00000020605  | -0,241 | 0,021 Hs1bp3     | ENSMUSG00000038618  | -0,554 | 0,010 Rassf7        |
| ENSMUSG00000058388  | -0,242 | 0,026 Phtf1      | ENSMUSG00000020492  | -0,555 | 0,000 Ska2          |
| ENSMUSG00000019295  | -0,243 | 0,012 Tmem129    | ENSMUSG00000032633  | -0,555 | 0,003 Flcn          |
| ENSMUSG000000029536 | -0,243 | 0,004 Gatc       | ENSMUSG00000030930  | -0,556 | 0,000 Chst15        |
| ENSMUSG00000029201  | -0,244 | 0,038 Ugdh       | ENSMUSG00000023972  | -0,556 | 0,002 Ptk7          |
| ENSMUSG00000028737  | -0,245 | 0,024 Aldh4a1    | ENSMUSG00000009575  | -0,558 | 0,001 Cbx5          |
| ENSMUSG000000032513 | -0,246 | 0,004 Gorasp1    | ENSMUSG00000039853  | -0,558 | 0,031 Trim14        |
| ENSMUSG00000004567  | -0,248 | 0,025 Mcoln1     | ENSMUSG00000073791  | -0,559 | 0,003 Efcab7        |
| ENSMUSG00000036057  | -0,248 | 0,036 Ptpn23     | ENSMUSG00000074793  | -0,559 | 0,013 Hspa12b       |
| ENSMUSG00000020385  | -0,249 | 0,024 Clk4       | ENSMUSG00000073705  | -0,563 | 0,033 Cenps         |

|                     |        |               |                    |        |                 |
|---------------------|--------|---------------|--------------------|--------|-----------------|
| ENSMUSG00000026174  | -0,250 | 0,002 Cnot9   | ENSMUSG00000040147 | -0,564 | 0,046 Maob      |
| ENSMUSG000000035206 | -0,250 | 0,001 Sppl2b  | ENSMUSG00000006585 | -0,565 | 0,000 Cdt1      |
| ENSMUSG00000016619  | -0,251 | 0,012 Nup50   | ENSMUSG00000006235 | -0,565 | 0,000 Epor      |
| ENSMUSG00000019715  | -0,251 | 0,000 Gle1    | ENSMUSG00000089715 | -0,566 | 0,000 Cbx6      |
| ENSMUSG00000047412  | -0,251 | 0,031 Zbtb44  | ENSMUSG00000052302 | -0,569 | 0,043 Tbc1d30   |
| ENSMUSG00000040365  | -0,252 | 0,002 Trim41  | ENSMUSG00000062683 | -0,569 | 0,000 Atp5g2    |
| ENSMUSG00000022898  | -0,252 | 0,000 Dscr3   | ENSMUSG00000027242 | -0,570 | 0,008 Wdr76     |
| ENSMUSG00000020941  | -0,253 | 0,038 Map3k14 | ENSMUSG00000028943 | -0,570 | 0,001 Espn      |
| ENSMUSG000000028096 | -0,253 | 0,039 Gpr89   | ENSMUSG00000059810 | -0,570 | 0,000 Rgs3      |
| ENSMUSG00000037012  | -0,253 | 0,006 Hk1     | ENSMUSG00000031150 | -0,570 | 0,042 Ccdc120   |
| ENSMUSG00000047766  | -0,254 | 0,019 Lrrc49  | ENSMUSG00000042628 | -0,572 | 0,000 Zfyve1    |
| ENSMUSG00000002871  | -0,254 | 0,009 Tpra1   | ENSMUSG00000024666 | -0,573 | 0,000 Tmem138   |
| ENSMUSG000000037344 | -0,254 | 0,008 Slc12a9 | ENSMUSG00000026688 | -0,573 | 0,032 Mgst3     |
| ENSMUSG00000021483  | -0,254 | 0,042 Cdk20   | ENSMUSG00000051517 | -0,574 | 0,022 Arhgef39  |
| ENSMUSG00000036435  | -0,254 | 0,001 Exoc1   | ENSMUSG00000031669 | -0,574 | 0,000 Gins3     |
| ENSMUSG00000002793  | -0,254 | 0,018 B4galt4 | ENSMUSG00000086712 | -0,575 | 0,016 Al427809  |
| ENSMUSG00000089872  | -0,255 | 0,020 Rps6kc1 | ENSMUSG00000024742 | -0,575 | 0,000 Fen1      |
| ENSMUSG00000020818  | -0,255 | 0,002 Mfsd11  | ENSMUSG00000079304 | -0,575 | 0,040 Tex52     |
| ENSMUSG00000042726  | -0,256 | 0,006 Trafd1  | ENSMUSG00000040621 | -0,575 | 0,000 Gemin8    |
| ENSMUSG00000003810  | -0,256 | 0,008 Mast2   | ENSMUSG00000006378 | -0,576 | 0,005 Gcat      |
| ENSMUSG00000019143  | -0,257 | 0,000 Hars2   | ENSMUSG00000072837 | -0,577 | 0,001 Mir546    |
| ENSMUSG00000000876  | -0,257 | 0,001 Pxmp4   | ENSMUSG00000005470 | -0,578 | 0,007 Asf1b     |
| ENSMUSG000000027342 | -0,258 | 0,017 Pcna    | ENSMUSG00000078942 | -0,578 | 0,013 Naip6     |
| ENSMUSG00000032333  | -0,258 | 0,043 Stoml1  | ENSMUSG00000047786 | -0,578 | 0,008 Lix1      |
| ENSMUSG00000008226  | -0,258 | 0,041 Scrn3   | ENSMUSG00000038215 | -0,581 | 0,000 Cep44     |
| ENSMUSG00000042055  | -0,260 | 0,021 Wdr11   | ENSMUSG00000078429 | -0,581 | 0,000 Ctdsp2    |
| ENSMUSG000000022718 | -0,260 | 0,037 Dgcr8   | ENSMUSG00000021180 | -0,584 | 0,017 Rps6ka5   |
| ENSMUSG00000027620  | -0,261 | 0,004 Rbm39   | ENSMUSG00000029406 | -0,585 | 0,005 Pitpnm2   |
| ENSMUSG00000062110  | -0,261 | 0,026 Scfd2   | ENSMUSG00000036526 | -0,585 | 0,038 Card11    |
| ENSMUSG000000021982 | -0,262 | 0,011 Cdadc1  | ENSMUSG00000025555 | -0,585 | 0,001 Farp1     |
| ENSMUSG00000024764  | -0,262 | 0,037 Naa40   | ENSMUSG00000015217 | -0,586 | 0,000 Hmgb3     |
| ENSMUSG00000021065  | -0,262 | 0,034 Fut8    | ENSMUSG00000018983 | -0,586 | 0,003 E2f2      |
| ENSMUSG00000018841  | -0,262 | 0,014 Rad51d  | ENSMUSG00000035683 | -0,586 | 0,016 Melk      |
| ENSMUSG00000040701  | -0,263 | 0,045 Ap1g2   | ENSMUSG00000076617 | -0,587 | 0,038 Ighm      |
| ENSMUSG00000022414  | -0,263 | 0,014 Tab1    | ENSMUSG00000029438 | -0,588 | 0,000 Bcl7a     |
| ENSMUSG00000024833  | -0,264 | 0,006 Pola2   | ENSMUSG00000044783 | -0,588 | 0,001 Hjurp     |
| ENSMUSG000000028799 | -0,265 | 0,001 Zfp362  | ENSMUSG00000091498 | -0,589 | 0,001 Mpc1-ps   |
| ENSMUSG00000025077  | -0,265 | 0,013 Dclre1a | ENSMUSG00000062081 | -0,589 | 0,008 Gm6055    |
| ENSMUSG00000028394  | -0,266 | 0,013 Pole3   | ENSMUSG00000020415 | -0,592 | 0,040 Pttg1     |
| ENSMUSG00000024588  | -0,266 | 0,001 Fech    | ENSMUSG00000047881 | -0,593 | 0,000 Rell1     |
| ENSMUSG00000041528  | -0,268 | 0,014 Rnf123  | ENSMUSG00000027454 | -0,594 | 0,000 Gins1     |
| ENSMUSG00000002781  | -0,269 | 0,007 Tmem143 | ENSMUSG00000107476 | -0,594 | 0,009 Zfp862-ps |
| ENSMUSG00000027227  | -0,271 | 0,027 Sord    | ENSMUSG00000079559 | -0,596 | 0,034 Colca2    |
| ENSMUSG000000034042 | -0,272 | 0,000 Gpbp111 | ENSMUSG00000034906 | -0,596 | 0,000 Ncaph     |
| ENSMUSG00000034863  | -0,273 | 0,000 Ano8    | ENSMUSG00000045625 | -0,596 | 0,018 Pigz      |
| ENSMUSG00000020752  | -0,273 | 0,000 Recql5  | ENSMUSG00000097415 | -0,597 | 0,003 AU020206  |
| ENSMUSG00000038506  | -0,273 | 0,049 Dcun1d2 | ENSMUSG00000021573 | -0,600 | 0,017 Tppp      |



|                     |        |                |                     |        |                     |
|---------------------|--------|----------------|---------------------|--------|---------------------|
| ENSMUSG00000028917  | -0,273 | 0,034 Plekhm2  | ENSMUSG00000054115  | -0,602 | 0,000 Skp2          |
| ENSMUSG00000028221  | -0,274 | 0,019 Tmem55a  | ENSMUSG00000045930  | -0,602 | 0,013 Clec14a       |
| ENSMUSG00000050989  | -0,275 | 0,011 Selenon  | ENSMUSG00000056394  | -0,603 | 0,000 Lig1          |
| ENSMUSG00000062906  | -0,275 | 0,010 Hdac10   | ENSMUSG00000038390  | -0,603 | 0,007 Gpr162        |
| ENSMUSG00000062040  | -0,276 | 0,047 Zfp27    | ENSMUSG00000044037  | -0,604 | 0,002 Als2cl        |
| ENSMUSG00000038425  | -0,276 | 0,003 Poli     | ENSMUSG00000034601  | -0,606 | 0,000 2700049A03Rik |
| ENSMUSG00000009079  | -0,276 | 0,000 Ewsr1    | ENSMUSG00000050379  | -0,607 | 0,000 Sept6         |
| ENSMUSG00000020770  | -0,276 | 0,003 Unk      | ENSMUSG00000026080  | -0,607 | 0,002 Chst10        |
| ENSMUSG000000027010 | -0,276 | 0,004 Slc25a12 | ENSMUSG00000032121  | -0,607 | 0,000 Tmem218       |
| ENSMUSG00000068335  | -0,276 | 0,001 Dok1     | ENSMUSG000000109523 | -0,607 | 0,031 Gdf1          |
| ENSMUSG00000029056  | -0,277 | 0,032 Pank4    | ENSMUSG00000045165  | -0,610 | 0,002 Al467606      |
| ENSMUSG00000029098  | -0,277 | 0,020 Acox3    | ENSMUSG00000040936  | -0,610 | 0,027 Ulk4          |
| ENSMUSG00000067369  | -0,277 | 0,013 Trmt2b   | ENSMUSG00000052688  | -0,611 | 0,007 Rab7b         |
| ENSMUSG00000034485  | -0,277 | 0,018 Uaca     | ENSMUSG00000059713  | -0,611 | 0,000 Rcan3         |
| ENSMUSG00000037523  | -0,277 | 0,025 Mavs     | ENSMUSG00000066191  | -0,612 | 0,000 Anks6         |
| ENSMUSG000000031358 | -0,278 | 0,029 Msl3     | ENSMUSG00000028789  | -0,612 | 0,011 Azin2         |
| ENSMUSG00000024590  | -0,281 | 0,023 Lmnb1    | ENSMUSG00000022021  | -0,612 | 0,002 Diaph3        |
| ENSMUSG00000033628  | -0,281 | 0,001 Pik3c3   | ENSMUSG00000018931  | -0,613 | 0,000 Natd1         |
| ENSMUSG000000031161 | -0,281 | 0,000 Hdac6    | ENSMUSG00000039908  | -0,613 | 0,032 Slc26a11      |
| ENSMUSG000000037257 | -0,281 | 0,016 Aagab    | ENSMUSG00000020744  | -0,614 | 0,001 Slc25a19      |
| ENSMUSG00000078517  | -0,283 | 0,036 Emc1     | ENSMUSG00000043614  | -0,615 | 0,008 Vps37d        |
| ENSMUSG00000001034  | -0,283 | 0,001 Mapk7    | ENSMUSG00000030254  | -0,616 | 0,003 Rad18         |
| ENSMUSG000000025925 | -0,283 | 0,001 Terf1    | ENSMUSG00000032352  | -0,617 | 0,002 Lrrc1         |
| ENSMUSG00000021271  | -0,284 | 0,024 Zfp839   | ENSMUSG00000029363  | -0,618 | 0,000 Rfc5          |
| ENSMUSG00000049858  | -0,284 | 0,014 Suox     | ENSMUSG00000010064  | -0,618 | 0,001 Slc38a3       |
| ENSMUSG00000070814  | -0,284 | 0,008 Zswim9   | ENSMUSG00000038068  | -0,618 | 0,018 Rnf144b       |
| ENSMUSG000000039637 | -0,285 | 0,005 Coro7    | ENSMUSG00000029869  | -0,619 | 0,004 Ephb6         |
| ENSMUSG00000038718  | -0,285 | 0,013 Pbx3     | ENSMUSG00000050022  | -0,621 | 0,000 Amz1          |
| ENSMUSG00000030614  | -0,285 | 0,016 Tmem126b | ENSMUSG00000027469  | -0,621 | 0,004 Tpx2          |
| ENSMUSG000000022558 | -0,285 | 0,019 Mroh1    | ENSMUSG00000019214  | -0,623 | 0,004 Chtf18        |
| ENSMUSG000000031485 | -0,285 | 0,002 Plppb    | ENSMUSG00000070390  | -0,624 | 0,038 Nlrp1b        |
| ENSMUSG00000052395  | -0,287 | 0,000 Rft1     | ENSMUSG00000071176  | -0,625 | 0,008 Arhgef10      |
| ENSMUSG00000046949  | -0,288 | 0,004 Nqo2     | ENSMUSG00000041859  | -0,625 | 0,000 Mcm3          |
| ENSMUSG00000062646  | -0,289 | 0,050 Ganc     | ENSMUSG00000036867  | -0,626 | 0,001 Smad6         |
| ENSMUSG00000038260  | -0,289 | 0,030 Trpm4    | ENSMUSG00000035024  | -0,626 | 0,004 Ncapd3        |
| ENSMUSG00000038604  | -0,289 | 0,022 Ripor1   | ENSMUSG00000021287  | -0,626 | 0,000 Xrcc3         |
| ENSMUSG000000020196 | -0,289 | 0,015 Cabin1   | ENSMUSG00000063445  | -0,627 | 0,000 Nmr1          |
| ENSMUSG00000039781  | -0,290 | 0,045 Cep131   | ENSMUSG00000022723  | -0,628 | 0,006 Crybg3        |
| ENSMUSG00000033703  | -0,290 | 0,019 Fuk      | ENSMUSG00000042500  | -0,629 | 0,003 Ago4          |
| ENSMUSG00000026134  | -0,290 | 0,008 Prim2    | ENSMUSG00000038943  | -0,630 | 0,002 Prc1          |
| ENSMUSG00000046753  | -0,290 | 0,048 Ccdc66   | ENSMUSG00000031595  | -0,630 | 0,004 Pdgfrl        |
| ENSMUSG000000099519 | -0,291 | 0,000 Gm29253  | ENSMUSG00000053062  | -0,630 | 0,013 Jam2          |
| ENSMUSG00000029047  | -0,293 | 0,033 Pex10    | ENSMUSG00000039963  | -0,630 | 0,025 Ccdc40        |
| ENSMUSG00000025008  | -0,293 | 0,047 Tctn3    | ENSMUSG00000056214  | -0,631 | 0,001 Pard6g        |
| ENSMUSG00000025366  | -0,294 | 0,013 Esyt1    | ENSMUSG00000050390  | -0,632 | 0,014 C77080        |
| ENSMUSG00000035399  | -0,295 | 0,046 Oser1    | ENSMUSG00000020592  | -0,633 | 0,002 Sdc1          |
| ENSMUSG00000038564  | -0,295 | 0,035 Ift172   | ENSMUSG00000020593  | -0,634 | 0,006 Lpin1         |

|                     |        |                     |                     |        |                     |
|---------------------|--------|---------------------|---------------------|--------|---------------------|
| ENSMUSG00000026925  | -0,296 | 0,023 Inpp5e        | ENSMUSG00000030319  | -0,634 | 0,002 Cand2         |
| ENSMUSG00000061313  | -0,296 | 0,030 Ddhd2         | ENSMUSG00000030978  | -0,635 | 0,000 Rrm1          |
| ENSMUSG00000111409  | -0,296 | 0,036 Rnf26         | ENSMUSG00000026355  | -0,636 | 0,000 Mcm6          |
| ENSMUSG00000037826  | -0,296 | 0,047 Ppm1k         | ENSMUSG00000019732  | -0,638 | 0,042 Calr3         |
| ENSMUSG00000042138  | -0,297 | 0,016 Msantd2       | ENSMUSG00000020019  | -0,639 | 0,042 Ntn4          |
| ENSMUSG00000038206  | -0,297 | 0,001 Fbxo8         | ENSMUSG00000021575  | -0,639 | 0,001 Ahrr          |
| ENSMUSG00000062526  | -0,298 | 0,010 Mppe1         | ENSMUSG00000029512  | -0,639 | 0,000 Ulk1          |
| ENSMUSG00000027341  | -0,298 | 0,049 Tmem230       | ENSMUSG00000039385  | -0,640 | 0,040 Cdh6          |
| ENSMUSG000000026270 | -0,298 | 0,015 Capn10        | ENSMUSG00000024901  | -0,640 | 0,001 Peli3         |
| ENSMUSG00000046897  | -0,299 | 0,005 Zfp740        | ENSMUSG00000027075  | -0,642 | 0,000 Slc43a1       |
| ENSMUSG00000024561  | -0,299 | 0,000 Mbd1          | ENSMUSG00000021176  | -0,643 | 0,001 Efcab11       |
| ENSMUSG00000024556  | -0,299 | 0,032 Me2           | ENSMUSG00000007646  | -0,644 | 0,000 Rad51c        |
| ENSMUSG00000034006  | -0,299 | 0,012 Pqlc1         | ENSMUSG00000026955  | -0,644 | 0,004 Sapcd2        |
| ENSMUSG00000020747  | -0,300 | 0,024 Tmem94        | ENSMUSG00000032218  | -0,645 | 0,011 Ccnb2         |
| ENSMUSG00000038241  | -0,300 | 0,018 Cep250        | ENSMUSG00000024989  | -0,645 | 0,034 Cep55         |
| ENSMUSG000000031453 | -0,301 | 0,049 Rasa3         | ENSMUSG000000087408 | -0,645 | 0,001 Cers1         |
| ENSMUSG00000010660  | -0,301 | 0,003 Plcd1         | ENSMUSG000000041147 | -0,647 | 0,000 Brca2         |
| ENSMUSG00000037894  | -0,302 | 0,031 H2afz         | ENSMUSG00000001039  | -0,647 | 0,006 B9d1          |
| ENSMUSG00000026482  | -0,302 | 0,048 Rgl1          | ENSMUSG00000036862  | -0,648 | 0,034 Dchs1         |
| ENSMUSG00000040964  | -0,302 | 0,005 Arhgef10l     | ENSMUSG00000055884  | -0,650 | 0,016 Fancm         |
| ENSMUSG00000072847  | -0,303 | 0,043 A530017D24Rik | ENSMUSG00000003824  | -0,650 | 0,024 Syce2         |
| ENSMUSG00000047037  | -0,304 | 0,029 Nipa1         | ENSMUSG00000078762  | -0,651 | 0,000 Haus5         |
| ENSMUSG000000087385 | -0,304 | 0,045 Frg2f1        | ENSMUSG00000046618  | -0,651 | 0,023 Olfm12a       |
| ENSMUSG00000030780  | -0,305 | 0,002 BC017158      | ENSMUSG00000049624  | -0,655 | 0,000 Slc17a5       |
| ENSMUSG00000032192  | -0,305 | 0,029 Gnb5          | ENSMUSG00000021747  | -0,655 | 0,007 4930452B06Rik |
| ENSMUSG00000007589  | -0,305 | 0,009 Tinf2         | ENSMUSG00000059013  | -0,655 | 0,000 Sh2d3c        |
| ENSMUSG00000032498  | -0,306 | 0,004 Mlh1          | ENSMUSG00000037572  | -0,656 | 0,000 Wdhd1         |
| ENSMUSG00000047514  | -0,307 | 0,007 Tspyl1        | ENSMUSG00000048249  | -0,657 | 0,001 Crebrf        |
| ENSMUSG00000115074  | -0,307 | 0,000 AL732309.2    | ENSMUSG00000021884  | -0,658 | 0,000 Hacl1         |
| ENSMUSG000000039989 | -0,307 | 0,045 Cbx4          | ENSMUSG00000039763  | -0,659 | 0,001 Dnajc28       |
| ENSMUSG00000074738  | -0,307 | 0,024 Fndc10        | ENSMUSG00000024795  | -0,663 | 0,020 Kif20b        |
| ENSMUSG00000028809  | -0,307 | 0,018 Srrm1         | ENSMUSG00000020774  | -0,665 | 0,007 Aspa          |
| ENSMUSG00000009621  | -0,308 | 0,026 Vav2          | ENSMUSG00000048965  | -0,666 | 0,000 Mrgpre        |
| ENSMUSG00000035863  | -0,308 | 0,034 Palm          | ENSMUSG00000025140  | -0,666 | 0,010 Pycr1         |
| ENSMUSG00000039307  | -0,309 | 0,050 Hexdc         | ENSMUSG00000031756  | -0,667 | 0,000 Cenpn         |
| ENSMUSG00000044465  | -0,310 | 0,001 Fam160a2      | ENSMUSG00000044702  | -0,667 | 0,000 Palb2         |
| ENSMUSG000000027984 | -0,310 | 0,005 Hadh          | ENSMUSG000000115022 | -0,668 | 0,000 Hacl1         |
| ENSMUSG00000006127  | -0,310 | 0,000 Inpp5k        | ENSMUSG00000028873  | -0,668 | 0,005 Cdca8         |
| ENSMUSG00000021023  | -0,311 | 0,020 1110008L16Rik | ENSMUSG00000043290  | -0,669 | 0,000 Zfp784        |
| ENSMUSG00000027291  | -0,313 | 0,013 Vps39         | ENSMUSG00000047757  | -0,669 | 0,002 Fancb         |
| ENSMUSG000000021820 | -0,313 | 0,008 Camk2g        | ENSMUSG00000019699  | -0,669 | 0,029 Akt3          |
| ENSMUSG00000020439  | -0,313 | 0,012 Smtn          | ENSMUSG00000054893  | -0,670 | 0,000 Zfp667        |
| ENSMUSG00000028484  | -0,313 | 0,000 Psip1         | ENSMUSG00000022091  | -0,670 | 0,000 Sorbs3        |
| ENSMUSG000000022389 | -0,314 | 0,033 Tef           | ENSMUSG00000022033  | -0,670 | 0,002 Pbk           |
| ENSMUSG00000030929  | -0,314 | 0,050 Eri2          | ENSMUSG00000037725  | -0,671 | 0,001 Ckap2         |
| ENSMUSG00000059772  | -0,314 | 0,009 Slx1b         | ENSMUSG00000020914  | -0,672 | 0,007 Top2a         |
| ENSMUSG00000055436  | -0,314 | 0,016 Srsf11        | ENSMUSG00000054850  | -0,672 | 0,001 Smim10l2a     |



|                     |        |                 |                    |        |                |
|---------------------|--------|-----------------|--------------------|--------|----------------|
| ENSMUSG00000025050  | -0,314 | 0,032 Pcgf6     | ENSMUSG00000029413 | -0,673 | 0,038 Naaa     |
| ENSMUSG00000035891  | -0,316 | 0,019 Cerk      | ENSMUSG00000048458 | -0,673 | 0,001 Fam212b  |
| ENSMUSG00000043411  | -0,317 | 0,032 Usp48     | ENSMUSG00000074194 | -0,674 | 0,019 Zfp791   |
| ENSMUSG00000007850  | -0,318 | 0,002 Hnrnp1    | ENSMUSG00000002997 | -0,675 | 0,003 Prkar2b  |
| ENSMUSG00000025283  | -0,318 | 0,030 Sat1      | ENSMUSG00000073371 | -0,676 | 0,004 Gm6594   |
| ENSMUSG00000057778  | -0,318 | 0,016 Cyb5d2    | ENSMUSG00000027533 | -0,677 | 0,004 Fabp5    |
| ENSMUSG00000016933  | -0,318 | 0,045 Plcg1     | ENSMUSG00000006398 | -0,678 | 0,010 Cdc20    |
| ENSMUSG00000022885  | -0,319 | 0,021 St6gal1   | ENSMUSG00000019303 | -0,678 | 0,001 Psmc3ip  |
| ENSMUSG000000036678 | -0,319 | 0,022 Aaas      | ENSMUSG00000022756 | -0,679 | 0,000 Slc7a4   |
| ENSMUSG000000024118 | -0,319 | 0,009 Tedc2     | ENSMUSG00000032251 | -0,679 | 0,032 Irak1bp1 |
| ENSMUSG00000062075  | -0,320 | 0,005 Lmnb2     | ENSMUSG00000002409 | -0,680 | 0,000 Dyrk1b   |
| ENSMUSG00000024006  | -0,320 | 0,000 Stk38     | ENSMUSG00000025001 | -0,680 | 0,010 Hells    |
| ENSMUSG00000028582  | -0,321 | 0,000 Cc2d1b    | ENSMUSG00000022203 | -0,681 | 0,018 Efs      |
| ENSMUSG00000022244  | -0,321 | 0,018 Amacr     | ENSMUSG00000071723 | -0,685 | 0,012 Gspt2    |
| ENSMUSG00000029455  | -0,321 | 0,024 Aldh2     | ENSMUSG00000022385 | -0,686 | 0,001 Gtse1    |
| ENSMUSG000000026031 | -0,322 | 0,035 Cflar     | ENSMUSG00000048416 | -0,686 | 0,040 Mlf1     |
| ENSMUSG00000022019  | -0,322 | 0,000 Tdrd3     | ENSMUSG00000037568 | -0,686 | 0,003 Vash2    |
| ENSMUSG00000029547  | -0,323 | 0,007 Ints1     | ENSMUSG00000030380 | -0,687 | 0,004 Mzf1     |
| ENSMUSG00000070044  | -0,323 | 0,030 Fam149a   | ENSMUSG00000001403 | -0,687 | 0,006 Ube2c    |
| ENSMUSG00000019878  | -0,324 | 0,026 Hsf2      | ENSMUSG00000029910 | -0,690 | 0,000 Mad2l1   |
| ENSMUSG00000030161  | -0,324 | 0,005 Gabarapl1 | ENSMUSG00000025576 | -0,691 | 0,013 Rbfox3   |
| ENSMUSG00000022537  | -0,324 | 0,025 Tmem44    | ENSMUSG00000032855 | -0,691 | 0,036 Pkd1     |
| ENSMUSG000000000751 | -0,325 | 0,000 Rpa1      | ENSMUSG00000045751 | -0,693 | 0,000 Mms22l   |
| ENSMUSG00000028960  | -0,325 | 0,027 Ube4b     | ENSMUSG00000038370 | -0,694 | 0,012 Pcp4l1   |
| ENSMUSG00000053460  | -0,326 | 0,020 Ggcx      | ENSMUSG00000017716 | -0,696 | 0,031 Birc5    |
| ENSMUSG00000045730  | -0,327 | 0,035 Adrb2     | ENSMUSG00000024301 | -0,697 | 0,009 Kifc5b   |
| ENSMUSG00000035776  | -0,327 | 0,000 Cd99l2    | ENSMUSG00000047473 | -0,697 | 0,005 Zfp30    |
| ENSMUSG00000006288  | -0,327 | 0,000 Ttc5      | ENSMUSG00000021294 | -0,697 | 0,017 Kif26a   |
| ENSMUSG00000020263  | -0,327 | 0,049 App12     | ENSMUSG00000047747 | -0,698 | 0,008 Rnf150   |
| ENSMUSG000000026709 | -0,327 | 0,003 Dars2     | ENSMUSG00000026683 | -0,698 | 0,000 Nuf2     |
| ENSMUSG00000021007  | -0,328 | 0,031 Spata7    | ENSMUSG00000038119 | -0,698 | 0,049 Cdon     |
| ENSMUSG00000074093  | -0,328 | 0,016 Svip      | ENSMUSG00000017550 | -0,699 | 0,036 Atad5    |
| ENSMUSG00000037443  | -0,328 | 0,025 Cep85     | ENSMUSG00000005043 | -0,700 | 0,000 Sgsh     |
| ENSMUSG00000019917  | -0,329 | 0,046 Sept10    | ENSMUSG00000062510 | -0,701 | 0,000 Nsl1     |
| ENSMUSG00000025486  | -0,329 | 0,041 Sirt3     | ENSMUSG00000030110 | -0,703 | 0,018 Ret      |
| ENSMUSG00000050619  | -0,330 | 0,004 Zscan29   | ENSMUSG00000020099 | -0,704 | 0,010 Unc5b    |
| ENSMUSG000000020190 | -0,330 | 0,001 Mknk2     | ENSMUSG00000029299 | -0,706 | 0,007 Abcg3    |
| ENSMUSG00000032329  | -0,331 | 0,002 Hmg20a    | ENSMUSG00000056832 | -0,706 | 0,010 Ttc26    |
| ENSMUSG00000032264  | -0,331 | 0,000 Zw10      | ENSMUSG00000020895 | -0,707 | 0,016 Tmem107  |
| ENSMUSG00000002297  | -0,332 | 0,005 Dbf4      | ENSMUSG00000037628 | -0,707 | 0,036 Cdkn3    |
| ENSMUSG000000031641 | -0,332 | 0,002 Cbr4      | ENSMUSG00000041836 | -0,707 | 0,012 Ptpr     |
| ENSMUSG00000018372  | -0,333 | 0,009 Cep95     | ENSMUSG00000002870 | -0,709 | 0,000 Mcm2     |
| ENSMUSG00000029428  | -0,334 | 0,000 Stx2      | ENSMUSG00000031821 | -0,709 | 0,000 Gins2    |
| ENSMUSG000000039713 | -0,334 | 0,031 Plekhg5   | ENSMUSG00000024376 | -0,709 | 0,024 Epb41l4a |
| ENSMUSG00000027180  | -0,334 | 0,020 Fbxo3     | ENSMUSG00000020330 | -0,711 | 0,006 Hmnr     |
| ENSMUSG00000022106  | -0,334 | 0,009 Rcbtb2    | ENSMUSG00000052852 | -0,711 | 0,000 Reep1    |
| ENSMUSG00000042476  | -0,334 | 0,028 Abcb4     | ENSMUSG00000052921 | -0,712 | 0,018 Arhgef15 |

|                     |        |                     |                    |        |                     |
|---------------------|--------|---------------------|--------------------|--------|---------------------|
| ENSMUSG00000024974  | -0,335 | 0,011 Smc3          | ENSMUSG00000035246 | -0,713 | 0,002 Pcyt1b        |
| ENSMUSG00000039347  | -0,335 | 0,000 Atp6v0e2      | ENSMUSG00000023015 | -0,714 | 0,002 Racgap1       |
| ENSMUSG00000031858  | -0,336 | 0,033 Mau2          | ENSMUSG00000024727 | -0,714 | 0,036 Trpm6         |
| ENSMUSG00000079109  | -0,336 | 0,000 Pms2          | ENSMUSG00000045328 | -0,715 | 0,010 Cenpe         |
| ENSMUSG00000059482  | -0,336 | 0,035 2610301B20Rik | ENSMUSG00000085133 | -0,717 | 0,002 B930095G15Rik |
| ENSMUSG00000022621  | -0,336 | 0,010 Rab12         | ENSMUSG00000038022 | -0,718 | 0,000 Mindy4        |
| ENSMUSG00000041625  | -0,336 | 0,024 Ggact         | ENSMUSG00000108011 | -0,718 | 0,004 Gm44596       |
| ENSMUSG00000031787  | -0,337 | 0,000 Katnb1        | ENSMUSG00000029516 | -0,720 | 0,022 Cit           |
| ENSMUSG00000042787  | -0,337 | 0,004 Exog          | ENSMUSG00000031379 | -0,720 | 0,023 Pir           |
| ENSMUSG00000039958  | -0,337 | 0,015 Etfbkmt       | ENSMUSG00000038644 | -0,721 | 0,000 Pold1         |
| ENSMUSG00000025795  | -0,337 | 0,045 Rassf3        | ENSMUSG00000030528 | -0,722 | 0,000 Blm           |
| ENSMUSG00000109493  | -0,338 | 0,004 Gm45208       | ENSMUSG00000047115 | -0,722 | 0,011 Fam221a       |
| ENSMUSG00000039914  | -0,338 | 0,050 Coq10a        | ENSMUSG00000049488 | -0,724 | 0,000 Tmem67        |
| ENSMUSG00000030089  | -0,338 | 0,016 Slc41a3       | ENSMUSG00000021175 | -0,724 | 0,000 Cdca7l        |
| ENSMUSG00000020823  | -0,338 | 0,000 Sec14l1       | ENSMUSG00000020486 | -0,725 | 0,043 Sept4         |
| ENSMUSG000000025151 | -0,339 | 0,000 Maged1        | ENSMUSG00000016756 | -0,726 | 0,049 Cmah          |
| ENSMUSG00000044629  | -0,339 | 0,001 Cnrip1        | ENSMUSG00000028445 | -0,726 | 0,007 Enho          |
| ENSMUSG00000046567  | -0,339 | 0,028 4930430F08Rik | ENSMUSG00000029730 | -0,728 | 0,000 Mcm7          |
| ENSMUSG00000054728  | -0,340 | 0,023 Phactr1       | ENSMUSG00000027306 | -0,728 | 0,003 Nusap1        |
| ENSMUSG00000043190  | -0,340 | 0,030 Rfesd         | ENSMUSG00000032113 | -0,728 | 0,000 Chek1         |
| ENSMUSG00000031684  | -0,340 | 0,003 Slc10a7       | ENSMUSG00000040999 | -0,729 | 0,000 Dnmt1         |
| ENSMUSG00000027452  | -0,340 | 0,023 Acss1         | ENSMUSG00000028773 | -0,730 | 0,046 Fabp3         |
| ENSMUSG00000006471  | -0,341 | 0,001 Ndor1         | ENSMUSG00000034311 | -0,730 | 0,001 Kif4          |
| ENSMUSG00000032714  | -0,341 | 0,028 Syde1         | ENSMUSG00000027654 | -0,731 | 0,006 Fam83d        |
| ENSMUSG00000040410  | -0,342 | 0,002 Fbxl4         | ENSMUSG00000037151 | -0,732 | 0,000 Lrrc20        |
| ENSMUSG00000006527  | -0,342 | 0,038 Sfmbt1        | ENSMUSG00000094595 | -0,733 | 0,001 Fsbp          |
| ENSMUSG00000009828  | -0,343 | 0,000 Ick           | ENSMUSG00000027203 | -0,735 | 0,001 Dut           |
| ENSMUSG00000060301  | -0,344 | 0,010 2610008E11Rik | ENSMUSG00000047534 | -0,735 | 0,002 Mis18bp1      |
| ENSMUSG00000003778  | -0,344 | 0,001 Brd8          | ENSMUSG00000040111 | -0,737 | 0,001 Gramd1b       |
| ENSMUSG000000018796 | -0,344 | 0,028 Acsl1         | ENSMUSG00000036777 | -0,738 | 0,012 Anln          |
| ENSMUSG00000028089  | -0,344 | 0,001 Chd1l         | ENSMUSG00000041633 | -0,739 | 0,005 Kctd12b       |
| ENSMUSG00000040302  | -0,345 | 0,048 Rbm48         | ENSMUSG00000015568 | -0,739 | 0,007 Lpl           |
| ENSMUSG00000015944  | -0,347 | 0,001 Gatsl2        | ENSMUSG00000038252 | -0,740 | 0,000 Ncapd2        |
| ENSMUSG00000031959  | -0,347 | 0,031 Wdr59         | ENSMUSG00000025154 | -0,740 | 0,000 Arhgap19      |
| ENSMUSG00000018548  | -0,348 | 0,035 Trim37        | ENSMUSG00000044201 | -0,742 | 0,019 Cdc25c        |
| ENSMUSG00000056204  | -0,348 | 0,000 Pgpep1        | ENSMUSG00000074212 | -0,742 | 0,001 Dnajb14       |
| ENSMUSG000000039197 | -0,349 | 0,000 Adk           | ENSMUSG00000024525 | -0,744 | 0,000 Impa2         |
| ENSMUSG00000031821  | -0,349 | 0,027 Gins2         | ENSMUSG00000024791 | -0,744 | 0,001 Cdca5         |
| ENSMUSG00000019338  | -0,349 | 0,048 Zfp687        | ENSMUSG00000028587 | -0,747 | 0,005 Orc1          |
| ENSMUSG00000021179  | -0,350 | 0,013 Nrde2         | ENSMUSG00000107761 | -0,748 | 0,049 2010008C14Rik |
| ENSMUSG000000041471 | -0,350 | 0,049 Fam35a        | ENSMUSG00000048922 | -0,748 | 0,004 Cdca2         |
| ENSMUSG00000034032  | -0,351 | 0,010 Rpap1         | ENSMUSG00000030499 | -0,749 | 0,000 Kctd15        |
| ENSMUSG00000026986  | -0,352 | 0,011 Hnmt          | ENSMUSG00000031486 | -0,751 | 0,000 Adgra2        |
| ENSMUSG000000025791 | -0,353 | 0,000 Pgm2          | ENSMUSG00000084989 | -0,751 | 0,042 Crocc2        |
| ENSMUSG00000050382  | -0,353 | 0,010 Kif7          | ENSMUSG00000030515 | -0,752 | 0,000 Tarsl2        |
| ENSMUSG00000030067  | -0,353 | 0,025 Foxp1         | ENSMUSG00000048327 | -0,753 | 0,001 Ckap2l        |
| ENSMUSG00000021830  | -0,353 | 0,048 Txndc16       | ENSMUSG00000048424 | -0,753 | 0,034 Ranbp3l       |

|                     |        |                     |                     |        |                     |
|---------------------|--------|---------------------|---------------------|--------|---------------------|
| ENSMUSG00000035051  | -0,354 | 0,000 Dhx57         | ENSMUSG00000027715  | -0,754 | 0,001 Ccna2         |
| ENSMUSG00000028300  | -0,354 | 0,010 3110043O21Rik | ENSMUSG00000034206  | -0,754 | 0,002 Polq          |
| ENSMUSG00000038545  | -0,356 | 0,000 Cul7          | ENSMUSG00000027699  | -0,755 | 0,030 Ect2          |
| ENSMUSG00000026707  | -0,356 | 0,013 Nsun6         | ENSMUSG00000036295  | -0,757 | 0,021 Lrrn3         |
| ENSMUSG00000026213  | -0,356 | 0,004 Stk11ip       | ENSMUSG00000073910  | -0,758 | 0,040 Mob3b         |
| ENSMUSG00000039382  | -0,357 | 0,010 Wdr45         | ENSMUSG00000040276  | -0,758 | 0,000 Pacsin1       |
| ENSMUSG00000032782  | -0,357 | 0,001 Cntrob        | ENSMUSG00000006958  | -0,760 | 0,041 Chrd          |
| ENSMUSG00000034248  | -0,358 | 0,006 Slc25a37      | ENSMUSG00000022177  | -0,761 | 0,000 Haus4         |
| ENSMUSG000000031295 | -0,359 | 0,003 Phka2         | ENSMUSG00000020098  | -0,761 | 0,009 Pcbd1         |
| ENSMUSG00000000278  | -0,359 | 0,000 Scpep1        | ENSMUSG00000049580  | -0,762 | 0,000 Tsku          |
| ENSMUSG00000038365  | -0,359 | 0,000 Fbxo25        | ENSMUSG00000037466  | -0,764 | 0,000 Tedc1         |
| ENSMUSG00000041949  | -0,359 | 0,022 Tango6        | ENSMUSG00000040084  | -0,765 | 0,002 Bub1b         |
| ENSMUSG00000048142  | -0,360 | 0,004 Nat8l         | ENSMUSG000000114515 | -0,766 | 0,037 Aldoa         |
| ENSMUSG00000041491  | -0,360 | 0,001 Cep78         | ENSMUSG00000032717  | -0,767 | 0,035 Mdfi          |
| ENSMUSG00000043067  | -0,361 | 0,030 Dpy19l1       | ENSMUSG00000089837  | -0,768 | 0,043 Npcd          |
| ENSMUSG000000018395 | -0,362 | 0,037 Kif3a         | ENSMUSG00000003779  | -0,768 | 0,001 Kif20a        |
| ENSMUSG00000042834  | -0,363 | 0,002 Nrep          | ENSMUSG00000022322  | -0,768 | 0,001 Shcbp1        |
| ENSMUSG00000031668  | -0,364 | 0,035 Eif2ak3       | ENSMUSG00000072082  | -0,769 | 0,000 Ccnf          |
| ENSMUSG00000039671  | -0,364 | 0,028 Zmynd8        | ENSMUSG00000072762  | -0,770 | 0,002 4930522L14Rik |
| ENSMUSG000000023191 | -0,364 | 0,000 P3h3          | ENSMUSG00000022604  | -0,773 | 0,000 Cep97         |
| ENSMUSG00000039231  | -0,365 | 0,000 Suv39h1       | ENSMUSG00000001517  | -0,776 | 0,000 Foxm1         |
| ENSMUSG00000033065  | -0,365 | 0,000 Pfkcm         | ENSMUSG00000071324  | -0,777 | 0,000 Armc2         |
| ENSMUSG000000035629 | -0,365 | 0,018 Rubcn         | ENSMUSG000000054074 | -0,779 | 0,036 Skida1        |
| ENSMUSG00000032580  | -0,365 | 0,000 Rbm5          | ENSMUSG00000028803  | -0,779 | 0,000 Nipal3        |
| ENSMUSG00000030872  | -0,365 | 0,001 Gga2          | ENSMUSG00000035455  | -0,780 | 0,000 Fign1         |
| ENSMUSG00000030782  | -0,365 | 0,029 Tgfb111       | ENSMUSG00000040658  | -0,780 | 0,001 Dnph1         |
| ENSMUSG000000031922 | -0,366 | 0,002 Cep57         | ENSMUSG00000032815  | -0,781 | 0,002 Fanca         |
| ENSMUSG000000085793 | -0,366 | 0,000 Lin52         | ENSMUSG00000032400  | -0,783 | 0,000 Zwilch        |
| ENSMUSG00000038637  | -0,366 | 0,013 Lrrc56        | ENSMUSG00000000782  | -0,784 | 0,000 Tcf7          |
| ENSMUSG000000001750 | -0,366 | 0,001 Tcirg1        | ENSMUSG000000034023 | -0,785 | 0,001 Fancd2        |
| ENSMUSG00000034327  | -0,367 | 0,016 Kctd9         | ENSMUSG00000020381  | -0,785 | 0,000 Mrnip         |
| ENSMUSG00000037622  | -0,367 | 0,001 Wdte1         | ENSMUSG00000030346  | -0,787 | 0,000 Rad51ap1      |
| ENSMUSG00000020532  | -0,367 | 0,018 Acaca         | ENSMUSG00000075266  | -0,787 | 0,020 Cenpw         |
| ENSMUSG00000040820  | -0,367 | 0,020 Hlcs          | ENSMUSG00000037337  | -0,789 | 0,004 Map4k1        |
| ENSMUSG00000010307  | -0,368 | 0,012 Tmem86a       | ENSMUSG00000031883  | -0,790 | 0,031 Car7          |
| ENSMUSG00000046605  | -0,368 | 0,000 B3gnt11       | ENSMUSG00000032666  | -0,791 | 0,048 1700025G04Rik |
| ENSMUSG000000028245 | -0,369 | 0,000 Nsmaf         | ENSMUSG00000042029  | -0,791 | 0,028 Ncapg2        |
| ENSMUSG00000020474  | -0,371 | 0,004 Polm          | ENSMUSG000000051278 | -0,792 | 0,015 Zgrf1         |
| ENSMUSG00000034243  | -0,371 | 0,031 Golgb1        | ENSMUSG00000002055  | -0,793 | 0,000 Spag5         |
| ENSMUSG00000006641  | -0,372 | 0,002 Slc5a6        | ENSMUSG00000033083  | -0,795 | 0,001 Tbc1d4        |
| ENSMUSG000000037656 | -0,373 | 0,005 Slc20a2       | ENSMUSG00000074802  | -0,796 | 0,016 Gas2l3        |
| ENSMUSG00000026355  | -0,373 | 0,030 Mcm6          | ENSMUSG00000028121  | -0,797 | 0,000 Bcar3         |
| ENSMUSG00000013236  | -0,373 | 0,024 Ptpns         | ENSMUSG00000079685  | -0,797 | 0,004 Ulbp1         |
| ENSMUSG000000013033 | -0,374 | 0,017 Adgr11        | ENSMUSG000000064043 | -0,798 | 0,002 Tref1         |
| ENSMUSG000000055817 | -0,374 | 0,003 Mta3          | ENSMUSG00000049521  | -0,800 | 0,000 Cdc42ep1      |
| ENSMUSG00000026179  | -0,375 | 0,000 Pnkd          | ENSMUSG00000027331  | -0,801 | 0,002 Knstrn        |
| ENSMUSG00000027695  | -0,375 | 0,027 Pld1          | ENSMUSG00000015880  | -0,804 | 0,002 Ncapg         |

|                     |        |                     |                     |        |                     |
|---------------------|--------|---------------------|---------------------|--------|---------------------|
| ENSMUSG00000021975  | -0,375 | 0,000 Ints9         | ENSMUSG00000030865  | -0,807 | 0,018 Chp2          |
| ENSMUSG00000002504  | -0,375 | 0,044 Slc9a3r2      | ENSMUSG00000074476  | -0,808 | 0,003 Spc24         |
| ENSMUSG000000050144 | -0,376 | 0,003 Slc25a44      | ENSMUSG00000033060  | -0,809 | 0,034 Lmo7          |
| ENSMUSG00000047407  | -0,376 | 0,021 Tgif1         | ENSMUSG00000021714  | -0,810 | 0,004 Cenpk         |
| ENSMUSG00000009739  | -0,376 | 0,005 Pou6f1        | ENSMUSG00000069910  | -0,811 | 0,000 Spd1          |
| ENSMUSG000000020086 | -0,376 | 0,043 H2afy2        | ENSMUSG00000029591  | -0,811 | 0,000 Ung           |
| ENSMUSG00000020380  | -0,376 | 0,001 Rad50         | ENSMUSG00000034917  | -0,812 | 0,001 Tjp3          |
| ENSMUSG00000033439  | -0,376 | 0,026 Trmt13        | ENSMUSG00000026605  | -0,812 | 0,005 Cenpf         |
| ENSMUSG000000074166 | -0,377 | 0,048 AW146154      | ENSMUSG00000087406  | -0,813 | 0,008 E130215H24Rik |
| ENSMUSG00000013629  | -0,377 | 0,022 Cad           | ENSMUSG00000017861  | -0,813 | 0,000 Mybl2         |
| ENSMUSG00000022617  | -0,378 | 0,016 Chkb          | ENSMUSG00000030091  | -0,817 | 0,000 Nup210        |
| ENSMUSG00000021245  | -0,378 | 0,010 Mlh3          | ENSMUSG00000027074  | -0,818 | 0,000 Slc43a3       |
| ENSMUSG00000019518  | -0,378 | 0,000 Ap4m1         | ENSMUSG00000049588  | -0,818 | 0,000 Ccdc69        |
| ENSMUSG00000030223  | -0,378 | 0,001 Ptpro         | ENSMUSG00000002032  | -0,819 | 0,002 Tmem25        |
| ENSMUSG00000028164  | -0,379 | 0,000 Manba         | ENSMUSG00000012443  | -0,820 | 0,002 Kif11         |
| ENSMUSG000000033059 | -0,379 | 0,000 Pygb          | ENSMUSG00000079553  | -0,827 | 0,001 Kifc1         |
| ENSMUSG00000036944  | -0,380 | 0,022 Tmem71        | ENSMUSG00000030123  | -0,828 | 0,014 Plxnd1        |
| ENSMUSG00000091498  | -0,380 | 0,042 Mpc1-ps       | ENSMUSG00000039055  | -0,829 | 0,000 Eme1          |
| ENSMUSG00000052949  | -0,380 | 0,006 Rnf157        | ENSMUSG00000026888  | -0,829 | 0,015 Grb14         |
| ENSMUSG00000029710  | -0,381 | 0,034 Ephb4         | ENSMUSG00000030677  | -0,830 | 0,003 Kif22         |
| ENSMUSG00000049739  | -0,381 | 0,015 Zfp646        | ENSMUSG00000051022  | -0,831 | 0,001 Hs3st1        |
| ENSMUSG00000004891  | -0,381 | 0,019 Nes           | ENSMUSG00000024245  | -0,832 | 0,004 Tmem178       |
| ENSMUSG000000039298 | -0,383 | 0,044 Cdk5rap2      | ENSMUSG00000027490  | -0,834 | 0,000 E2f1          |
| ENSMUSG00000027963  | -0,383 | 0,001 Extl2         | ENSMUSG00000028438  | -0,835 | 0,011 Kif24         |
| ENSMUSG00000029578  | -0,383 | 0,000 Wipi2         | ENSMUSG00000040631  | -0,835 | 0,001 Dok4          |
| ENSMUSG00000044068  | -0,384 | 0,002 Zrsr1         | ENSMUSG00000031004  | -0,837 | 0,004 Mki67         |
| ENSMUSG00000038884  | -0,385 | 0,041 A230050P20Rik | ENSMUSG00000030606  | -0,837 | 0,000 Hapln3        |
| ENSMUSG00000046152  | -0,385 | 0,013 Fut10         | ENSMUSG00000036768  | -0,837 | 0,000 Kif15         |
| ENSMUSG00000032397  | -0,385 | 0,007 Tipin         | ENSMUSG00000045092  | -0,838 | 0,000 S1pr1         |
| ENSMUSG000000054474 | -0,385 | 0,046 Thns12        | ENSMUSG00000022034  | -0,840 | 0,001 Esco2         |
| ENSMUSG00000030083  | -0,386 | 0,020 Abtb1         | ENSMUSG00000027698  | -0,842 | 0,000 Nceh1         |
| ENSMUSG00000031539  | -0,386 | 0,002 Ap3m2         | ENSMUSG00000027323  | -0,846 | 0,000 Rad51         |
| ENSMUSG00000039623  | -0,386 | 0,001 Ap5z1         | ENSMUSG00000022422  | -0,848 | 0,000 Dscc1         |
| ENSMUSG00000022369  | -0,386 | 0,000 Mtbp          | ENSMUSG00000006715  | -0,849 | 0,000 Gmn           |
| ENSMUSG00000005986  | -0,387 | 0,010 Ankrd13d      | ENSMUSG00000017002  | -0,851 | 0,029 Slpi          |
| ENSMUSG000000050107 | -0,387 | 0,002 Haspin        | ENSMUSG00000022358  | -0,851 | 0,000 Fbxo32        |
| ENSMUSG000000040040 | -0,387 | 0,007 Ift88         | ENSMUSG000000049119 | -0,852 | 0,000 Fam110b       |
| ENSMUSG00000028943  | -0,387 | 0,034 Espn          | ENSMUSG00000041064  | -0,853 | 0,000 Pif1          |
| ENSMUSG00000038520  | -0,388 | 0,021 Tbc1d17       | ENSMUSG00000027792  | -0,853 | 0,005 Bche          |
| ENSMUSG00000025235  | -0,388 | 0,000 Bbs4          | ENSMUSG00000051043  | -0,856 | 0,000 Gprc5c        |
| ENSMUSG000000071350 | -0,388 | 0,027 Setdb2        | ENSMUSG00000027115  | -0,857 | 0,001 Kif18a        |
| ENSMUSG00000033326  | -0,388 | 0,006 Kdm4a         | ENSMUSG0000011184   | -0,858 | 0,000 AC163703.1    |
| ENSMUSG00000021226  | -0,390 | 0,003 Acot2         | ENSMUSG00000025577  | -0,859 | 0,000 Cbx2          |
| ENSMUSG000000023055 | -0,390 | 0,000 Calcoco1      | ENSMUSG00000030867  | -0,860 | 0,000 Plk1          |
| ENSMUSG00000028675  | -0,390 | 0,000 Pnrc2         | ENSMUSG00000026039  | -0,860 | 0,001 Sgo2a         |
| ENSMUSG00000025358  | -0,390 | 0,000 Cdk2          | ENSMUSG00000023940  | -0,862 | 0,000 Sgo1          |
| ENSMUSG00000030177  | -0,390 | 0,000 Ccdc77        | ENSMUSG00000027379  | -0,862 | 0,000 Bub1          |



|                     |        |                  |                    |        |                     |
|---------------------|--------|------------------|--------------------|--------|---------------------|
| ENSMUSG00000031835  | -0,390 | 0,000 Mbtps1     | ENSMUSG00000031629 | -0,862 | 0,000 Cenpu         |
| ENSMUSG00000027829  | -0,391 | 0,004 Ccn1l      | ENSMUSG00000020974 | -0,863 | 0,000 Pole2         |
| ENSMUSG00000024660  | -0,391 | 0,013 Incenp     | ENSMUSG00000045231 | -0,864 | 0,003 BC106179      |
| ENSMUSG00000097715  | -0,391 | 0,038 Gpr137b-ps | ENSMUSG00000026447 | -0,865 | 0,043 Pik3c2b       |
| ENSMUSG00000029603  | -0,393 | 0,037 Dtx1       | ENSMUSG00000049538 | -0,865 | 0,014 Adamts16      |
| ENSMUSG00000041975  | -0,393 | 0,017 Mettl8     | ENSMUSG00000059479 | -0,865 | 0,004 B3gnt8        |
| ENSMUSG00000029186  | -0,394 | 0,001 Pi4k2b     | ENSMUSG00000027811 | -0,865 | 0,000 4930579G24Rik |
| ENSMUSG00000024666  | -0,394 | 0,003 Tmem138    | ENSMUSG00000034858 | -0,866 | 0,000 Fam214a       |
| ENSMUSG00000012017  | -0,394 | 0,004 Scarf2     | ENSMUSG00000020808 | -0,868 | 0,000 Pimreg        |
| ENSMUSG00000042408  | -0,395 | 0,048 Zmym6      | ENSMUSG00000040016 | -0,869 | 0,015 Ptger3        |
| ENSMUSG00000056698  | -0,395 | 0,001 Elmod3     | ENSMUSG00000050541 | -0,870 | 0,008 Adra1b        |
| ENSMUSG00000055493  | -0,395 | 0,028 Epm2a      | ENSMUSG00000030322 | -0,871 | 0,000 Mbd4          |
| ENSMUSG00000061371  | -0,396 | 0,024 Zfp873     | ENSMUSG00000039187 | -0,871 | 0,000 Fanci         |
| ENSMUSG00000054708  | -0,396 | 0,017 Ankrd24    | ENSMUSG00000069830 | -0,874 | 0,030 Nlrp1a        |
| ENSMUSG00000032898  | -0,396 | 0,017 Fbxo21     | ENSMUSG00000004110 | -0,874 | 0,038 Cacna1e       |
| ENSMUSG000000049657 | -0,396 | 0,006 Zbtb5      | ENSMUSG00000032254 | -0,879 | 0,000 Kif23         |
| ENSMUSG00000030323  | -0,397 | 0,016 Ift122     | ENSMUSG00000038305 | -0,880 | 0,000 Spats2l       |
| ENSMUSG00000020668  | -0,397 | 0,015 Kif3c      | ENSMUSG00000020623 | -0,880 | 0,000 Map2k6        |
| ENSMUSG00000025766  | -0,397 | 0,016 D3ErtD751e | ENSMUSG00000028718 | -0,880 | 0,001 Stil          |
| ENSMUSG00000002222  | -0,398 | 0,035 Rmnd5a     | ENSMUSG00000024420 | -0,881 | 0,010 Zfp521        |
| ENSMUSG00000038967  | -0,398 | 0,000 Pdk2       | ENSMUSG00000027496 | -0,882 | 0,000 Aurka         |
| ENSMUSG00000031266  | -0,399 | 0,006 Gla        | ENSMUSG00000040204 | -0,886 | 0,000 Pclaf         |
| ENSMUSG000000021377 | -0,399 | 0,002 Dek        | ENSMUSG00000028175 | -0,888 | 0,016 Depdc1a       |
| ENSMUSG00000066306  | -0,400 | 0,038 Numa1      | ENSMUSG00000086111 | -0,889 | 0,018 Gm15326       |
| ENSMUSG00000023919  | -0,400 | 0,002 Cenpq      | ENSMUSG00000068101 | -0,891 | 0,004 Cenpm         |
| ENSMUSG00000035722  | -0,400 | 0,001 Abca7      | ENSMUSG00000060402 | -0,891 | 0,012 Chst8         |
| ENSMUSG00000041341  | -0,400 | 0,039 Atg2b      | ENSMUSG00000110631 | -0,892 | 0,041 Gm42047       |
| ENSMUSG00000061455  | -0,402 | 0,000 Stx17      | ENSMUSG00000009876 | -0,892 | 0,018 Cox4i2        |
| ENSMUSG00000028497  | -0,402 | 0,050 Hacd4      | ENSMUSG00000029177 | -0,893 | 0,001 Cenpa         |
| ENSMUSG000000045039 | -0,403 | 0,013 Megf8      | ENSMUSG00000000028 | -0,893 | 0,000 Cdc45         |
| ENSMUSG00000004952  | -0,403 | 0,005 Rasa4      | ENSMUSG00000024056 | -0,893 | 0,000 Ndc80         |
| ENSMUSG00000048200  | -0,403 | 0,038 Cracr2b    | ENSMUSG00000020682 | -0,895 | 0,003 Mmp28         |
| ENSMUSG00000036249  | -0,404 | 0,002 Rbm43      | ENSMUSG00000045287 | -0,895 | 0,000 Rtn4rl1       |
| ENSMUSG00000017405  | -0,404 | 0,015 Nek8       | ENSMUSG00000021707 | -0,898 | 0,000 Dhfr          |
| ENSMUSG00000027284  | -0,405 | 0,037 Cdan1      | ENSMUSG00000050410 | -0,898 | 0,000 Tcf19         |
| ENSMUSG00000057530  | -0,406 | 0,019 Ece1       | ENSMUSG00000026622 | -0,898 | 0,001 Nek2          |
| ENSMUSG000000034518 | -0,407 | 0,007 Hmgxb4     | ENSMUSG00000106825 | -0,901 | 0,000 2510016D11Rik |
| ENSMUSG00000005225  | -0,407 | 0,012 Plekha8    | ENSMUSG00000001228 | -0,901 | 0,000 Uhrf1         |
| ENSMUSG00000008855  | -0,407 | 0,000 Hdac5      | ENSMUSG00000036223 | -0,901 | 0,000 Ska1          |
| ENSMUSG00000044712  | -0,408 | 0,021 Slc38a6    | ENSMUSG00000023505 | -0,901 | 0,000 Cdca3         |
| ENSMUSG00000041096  | -0,408 | 0,007 Tspyl2     | ENSMUSG00000020185 | -0,906 | 0,005 E2f7          |
| ENSMUSG00000003546  | -0,409 | 0,000 Klc4       | ENSMUSG00000020897 | -0,907 | 0,000 Aurkb         |
| ENSMUSG00000033763  | -0,409 | 0,049 Mtss1l     | ENSMUSG00000005410 | -0,907 | 0,000 Mcm5          |
| ENSMUSG000000065979 | -0,409 | 0,000 Cpped1     | ENSMUSG00000033207 | -0,907 | 0,002 Mamdc2        |
| ENSMUSG00000005362  | -0,409 | 0,047 Crbn       | ENSMUSG00000041431 | -0,907 | 0,000 Ccnb1         |
| ENSMUSG00000037461  | -0,410 | 0,001 Ints7      | ENSMUSG00000029070 | -0,908 | 0,001 Mxra8         |
| ENSMUSG00000028101  | -0,410 | 0,000 Pias3      | ENSMUSG00000079598 | -0,909 | 0,046 Clec2l        |

|                      |        |                     |                     |        |                     |
|----------------------|--------|---------------------|---------------------|--------|---------------------|
| ENSMUSG00000021713   | -0,410 | 0,020 Ppwd1         | ENSMUSG00000035413  | -0,911 | 0,000 Tmem98        |
| ENSMUSG000000037419  | -0,412 | 0,010 Endod1        | ENSMUSG000000031258 | -0,913 | 0,045 Xkrx          |
| ENSMUSG000000033713  | -0,412 | 0,005 Foxn3         | ENSMUSG000000037544 | -0,916 | 0,000 Dlgap5        |
| ENSMUSG000000040327  | -0,414 | 0,001 Cul9          | ENSMUSG000000020649 | -0,916 | 0,000 Rrm2          |
| ENSMUSG000000038481  | -0,414 | 0,011 Cdk19         | ENSMUSG000000056367 | -0,918 | 0,000 Actr3b        |
| ENSMUSG000000032842  | -0,414 | 0,011 Abcc10        | ENSMUSG000000040133 | -0,919 | 0,041 Gpr176        |
| ENSMUSG000000024018  | -0,414 | 0,005 Ccdc167       | ENSMUSG000000002835 | -0,919 | 0,000 Chaf1a        |
| ENSMUSG000000034685  | -0,414 | 0,013 Fam171a2      | ENSMUSG000000046814 | -0,920 | 0,029 Gchfr         |
| ENSMUSG000000021719  | -0,415 | 0,018 Rgs7bp        | ENSMUSG000000067714 | -0,920 | 0,017 Lpar5         |
| ENSMUSG000000029163  | -0,415 | 0,019 Emilin1       | ENSMUSG000000022360 | -0,921 | 0,000 Atad2         |
| ENSMUSG000000018651  | -0,415 | 0,000 Tada2a        | ENSMUSG000000039814 | -0,923 | 0,001 Xkr5          |
| ENSMUSG000000054717  | -0,416 | 0,016 Hmgb2         | ENSMUSG000000033752 | -0,924 | 0,044 Mnd1          |
| ENSMUSG000000053436  | -0,416 | 0,000 Mapk14        | ENSMUSG000000028278 | -0,925 | 0,000 Rragd         |
| ENSMUSG000000071337  | -0,417 | 0,013 Tia1          | ENSMUSG000000063810 | -0,925 | 0,018 Alms1         |
| ENSMUSG000000109061  | -0,417 | 0,047 Map2k7        | ENSMUSG000000025586 | -0,927 | 0,022 Cpeb1         |
| ENSMUSG000000040618  | -0,417 | 0,012 Pck2          | ENSMUSG000000027326 | -0,928 | 0,023 Knl1          |
| ENSMUSG000000087174  | -0,417 | 0,002 5530601H04Rik | ENSMUSG000000075502 | -0,930 | 0,040 Kbtbd6        |
| ENSMUSG000000027454  | -0,417 | 0,016 Gins1         | ENSMUSG000000044770 | -0,931 | 0,006 Scml4         |
| ENSMUSG000000048965  | -0,418 | 0,035 Mrgpre        | ENSMUSG000000033952 | -0,933 | 0,022 Aspm          |
| ENSMUSG000000029591  | -0,418 | 0,045 Ung           | ENSMUSG000000019773 | -0,933 | 0,000 Fbxo5         |
| ENSMUSG000000066838  | -0,418 | 0,017 Zfp772        | ENSMUSG000000034353 | -0,933 | 0,000 Ramp1         |
| ENSMUSG000000029191  | -0,419 | 0,000 Rfc1          | ENSMUSG000000025395 | -0,933 | 0,000 Prim1         |
| ENSMUSG000000036555  | -0,419 | 0,001 Iqce          | ENSMUSG000000055116 | -0,935 | 0,000 Arntl         |
| ENSMUSG000000028007  | -0,420 | 0,001 Snx7          | ENSMUSG000000029414 | -0,935 | 0,000 Kntc1         |
| ENSMUSG000000052056  | -0,421 | 0,047 Zfp217        | ENSMUSG000000036875 | -0,936 | 0,000 Dna2          |
| ENSMUSG000000002249  | -0,421 | 0,002 Tead3         | ENSMUSG000000053040 | -0,936 | 0,000 Aph1c         |
| ENSMUSG000000025816  | -0,423 | 0,000 Sec61a2       | ENSMUSG000000047875 | -0,938 | 0,004 Gpr157        |
| ENSMUSG000000043557  | -0,423 | 0,035 Mdga1         | ENSMUSG000000038379 | -0,938 | 0,000 Ttk           |
| ENSMUSG000000034121  | -0,424 | 0,000 Mks1          | ENSMUSG000000046591 | -0,944 | 0,000 Ticrr         |
| ENSMUSG0000000061536 | -0,425 | 0,027 Sec22c        | ENSMUSG000000031262 | -0,950 | 0,000 Cenpi         |
| ENSMUSG000000038042  | -0,425 | 0,000 Ptpdc1        | ENSMUSG000000020052 | -0,950 | 0,022 Ascl1         |
| ENSMUSG000000022853  | -0,425 | 0,016 Ehhadh        | ENSMUSG000000028212 | -0,953 | 0,000 Ccne2         |
| ENSMUSG000000021185  | -0,426 | 0,004 Dglucy        | ENSMUSG000000026779 | -0,954 | 0,000 Mastl         |
| ENSMUSG000000039936  | -0,426 | 0,007 Pik3cd        | ENSMUSG000000037474 | -0,954 | 0,000 Dtl           |
| ENSMUSG000000061288  | -0,427 | 0,001 Taok3         | ENSMUSG000000037991 | -0,958 | 0,005 Rmi2          |
| ENSMUSG000000002870  | -0,427 | 0,005 Mcm2          | ENSMUSG000000030559 | -0,961 | 0,018 Rab38         |
| ENSMUSG0000000063445 | -0,428 | 0,012 Nmr1l1        | ENSMUSG000000019027 | -0,962 | 0,019 Dnah1         |
| ENSMUSG000000071604  | -0,428 | 0,015 Fam189a2      | ENSMUSG000000045273 | -0,963 | 0,000 Cenph         |
| ENSMUSG000000043015  | -0,428 | 0,000 Nemp2         | ENSMUSG000000032377 | -0,966 | 0,026 Plscr4        |
| ENSMUSG000000022421  | -0,428 | 0,020 Nptxr         | ENSMUSG000000054134 | -0,968 | 0,010 Umodl1        |
| ENSMUSG000000110980  | -0,429 | 0,042 AC122428.2    | ENSMUSG000000031847 | -0,968 | 0,000 1700030J22Rik |
| ENSMUSG000000052911  | -0,430 | 0,000 Lamb2         | ENSMUSG000000078773 | -0,968 | 0,000 Rad54b        |
| ENSMUSG000000028456  | -0,430 | 0,024 Unc13b        | ENSMUSG000000050232 | -0,969 | 0,023 Cxcr3         |
| ENSMUSG000000056394  | -0,430 | 0,003 Lig1          | ENSMUSG000000051378 | -0,972 | 0,000 Kif18b        |
| ENSMUSG000000047342  | -0,430 | 0,017 Zfp286        | ENSMUSG000000006219 | -0,974 | 0,001 Fblim1        |
| ENSMUSG000000017119  | -0,430 | 0,002 Nbr1          | ENSMUSG000000034329 | -0,978 | 0,000 Brip1         |
| ENSMUSG000000023908  | -0,430 | 0,020 Pkmyt1        | ENSMUSG000000041957 | -0,981 | 0,004 Pkp2          |



|                      |        |                 |                      |        |                     |
|----------------------|--------|-----------------|----------------------|--------|---------------------|
| ENSMUSG00000057229   | -0,431 | 0,002 Dmac2     | ENSMUSG00000026196   | -0,981 | 0,001 Bard1         |
| ENSMUSG000000022673  | -0,431 | 0,003 Mcm4      | ENSMUSG000000033182  | -0,984 | 0,023 Kbtbd12       |
| ENSMUSG000000029863  | -0,432 | 0,021 Casp2     | ENSMUSG000000069743  | -0,988 | 0,002 Zfp820        |
| ENSMUSG000000099481  | -0,433 | 0,000 Xndc1     | ENSMUSG000000032313  | -0,988 | 0,022 Tmem266       |
| ENSMUSG000000028199  | -0,433 | 0,001 Cryz      | ENSMUSG000000028551  | -0,992 | 0,000 Cdkn2c        |
| ENSMUSG000000051343  | -0,433 | 0,011 Rab11fip5 | ENSMUSG000000021965  | -0,993 | 0,000 Ska3          |
| ENSMUSG000000028517  | -0,433 | 0,012 Plpp3     | ENSMUSG000000029283  | -0,993 | 0,000 Cdc7          |
| ENSMUSG000000057315  | -0,433 | 0,002 Arhgap24  | ENSMUSG000000031661  | -1,004 | 0,000 Nkd1          |
| ENSMUSG000000029279  | -0,434 | 0,020 Brdt      | ENSMUSG000000038319  | -1,012 | 0,000 Kcnh2         |
| ENSMUSG000000066357  | -0,434 | 0,000 Wdr6      | ENSMUSG000000022945  | -1,014 | 0,000 Chaf1b        |
| ENSMUSG000000032913  | -0,435 | 0,029 Lrig2     | ENSMUSG000000048096  | -1,020 | 0,049 Lmod1         |
| ENSMUSG000000020156  | -0,435 | 0,003 Mum1      | ENSMUSG000000026429  | -1,031 | 0,000 Ube2t         |
| ENSMUSG000000024240  | -0,436 | 0,003 Epc1      | ENSMUSG000000022519  | -1,032 | 0,000 Srl           |
| ENSMUSG000000035958  | -0,436 | 0,019 Tdp2      | ENSMUSG000000061175  | -1,036 | 0,002 Fnip2         |
| ENSMUSG000000028035  | -0,437 | 0,002 Dnajb4    | ENSMUSG000000039748  | -1,041 | 0,000 Exo1          |
| ENSMUSG000000034639  | -0,437 | 0,034 Setmar    | ENSMUSG000000022332  | -1,044 | 0,000 Khdrbs3       |
| ENSMUSG000000069255  | -0,437 | 0,000 Dusp22    | ENSMUSG000000051220  | -1,050 | 0,000 Ercc6l        |
| ENSMUSG000000029270  | -0,437 | 0,000 Fam69a    | ENSMUSG000000025574  | -1,054 | 0,000 Tk1           |
| ENSMUSG000000035877  | -0,438 | 0,001 Zhx3      | ENSMUSG000000034883  | -1,055 | 0,010 Lrr1          |
| ENSMUSG000000038860  | -0,438 | 0,001 Gaml3     | ENSMUSG000000023968  | -1,055 | 0,045 Crip3         |
| ENSMUSG000000019467  | -0,439 | 0,013 Arhgef25  | ENSMUSG000000022357  | -1,058 | 0,007 Kihl38        |
| ENSMUSG000000051721  | -0,439 | 0,012 Wdcp      | ENSMUSG000000028702  | -1,059 | 0,000 Rad54l        |
| ENSMUSG0000000092356 | -0,439 | 0,010 Gm20532   | ENSMUSG000000017146  | -1,060 | 0,000 Brca1         |
| ENSMUSG000000005198  | -0,440 | 0,039 Polr2a    | ENSMUSG000000024600  | -1,066 | 0,003 Slc27a6       |
| ENSMUSG000000027244  | -0,440 | 0,000 Atg13     | ENSMUSG000000061577  | -1,068 | 0,023 Adgrg5        |
| ENSMUSG000000034216  | -0,440 | 0,000 Vps18     | ENSMUSG000000039994  | -1,077 | 0,000 Timeless      |
| ENSMUSG000000050605  | -0,440 | 0,011 Zfp61     | ENSMUSG000000051606  | -1,078 | 0,001 2010001K21Rik |
| ENSMUSG000000038368  | -0,441 | 0,001 Focad     | ENSMUSG000000033033  | -1,080 | 0,000 Calhm2        |
| ENSMUSG000000040687  | -0,441 | 0,000 Madd      | ENSMUSG000000068744  | -1,083 | 0,000 Psrc1         |
| ENSMUSG0000000032737 | -0,441 | 0,005 Inpp1     | ENSMUSG000000006241  | -1,084 | 0,013 Ccdc159       |
| ENSMUSG000000028933  | -0,442 | 0,000 Xrcc2     | ENSMUSG000000044303  | -1,087 | 0,025 Cdkn2a        |
| ENSMUSG000000031770  | -0,442 | 0,004 Herpud1   | ENSMUSG000000030670  | -1,088 | 0,010 Cyp2r1        |
| ENSMUSG000000039050  | -0,442 | 0,000 Osbpl2    | ENSMUSG000000034303  | -1,092 | 0,007 Ccdc15        |
| ENSMUSG0000000035936 | -0,442 | 0,023 Aldh5a1   | ENSMUSG000000086040  | -1,094 | 0,032 Wipf3         |
| ENSMUSG000000033762  | -0,443 | 0,024 Recql4    | ENSMUSG000000006362  | -1,101 | 0,000 Cbfa2t3       |
| ENSMUSG000000043895  | -0,443 | 0,000 S1pr2     | ENSMUSG000000079502  | -1,101 | 0,023 Cfap77        |
| ENSMUSG0000000035401 | -0,443 | 0,000 Emsy      | ENSMUSG0000000042707 | -1,109 | 0,001 Dnal1         |
| ENSMUSG000000053470  | -0,443 | 0,017 Kdm3a     | ENSMUSG000000026274  | -1,110 | 0,000 Pask          |
| ENSMUSG000000022679  | -0,444 | 0,019 Mpv17l    | ENSMUSG000000057604  | -1,110 | 0,000 Lmcd1         |
| ENSMUSG000000009905  | -0,444 | 0,000 Kdsr      | ENSMUSG000000110537  | -1,111 | 0,001 Gm4316        |
| ENSMUSG0000000041966 | -0,445 | 0,009 Dcaf17    | ENSMUSG000000032783  | -1,114 | 0,000 Troap         |
| ENSMUSG000000045374  | -0,445 | 0,008 Wdr81     | ENSMUSG000000019982  | -1,114 | 0,000 Myb           |
| ENSMUSG000000040557  | -0,445 | 0,002 Mettl27   | ENSMUSG000000040710  | -1,119 | 0,003 St8sia4       |
| ENSMUSG000000024665  | -0,446 | 0,028 Fads2     | ENSMUSG000000007080  | -1,122 | 0,000 Pole          |
| ENSMUSG000000041859  | -0,447 | 0,001 Mcm3      | ENSMUSG000000034773  | -1,125 | 0,000 BC030867      |
| ENSMUSG000000029998  | -0,447 | 0,004 Pcyox1    | ENSMUSG000000026589  | -1,126 | 0,002 Sec16b        |
| ENSMUSG000000050530  | -0,447 | 0,005 Fam171a1  | ENSMUSG000000097429  | -1,127 | 0,008 Gm26520       |

|                     |        |                     |                     |        |                     |
|---------------------|--------|---------------------|---------------------|--------|---------------------|
| ENSMUSG00000022881  | -0,448 | 0,019 Rfc4          | ENSMUSG00000009418  | -1,145 | 0,000 Nav1          |
| ENSMUSG00000029366  | -0,448 | 0,032 Dck           | ENSMUSG00000026304  | -1,145 | 0,010 Rab17         |
| ENSMUSG00000025026  | -0,448 | 0,015 Add3          | ENSMUSG00000053706  | -1,153 | 0,012 B430305J03Rik |
| ENSMUSG00000028256  | -0,448 | 0,000 Odf2l         | ENSMUSG00000031554  | -1,159 | 0,012 Adam5         |
| ENSMUSG00000042063  | -0,448 | 0,039 Zfp386        | ENSMUSG00000026809  | -1,166 | 0,001 Spaca9        |
| ENSMUSG00000033717  | -0,449 | 0,011 Adra2a        | ENSMUSG00000041361  | -1,167 | 0,003 Myzap         |
| ENSMUSG00000054252  | -0,449 | 0,038 Fgfr3         | ENSMUSG00000072980  | -1,170 | 0,000 Oip5          |
| ENSMUSG00000024462  | -0,449 | 0,035 Gabbr1        | ENSMUSG00000035681  | -1,178 | 0,015 Kcnc2         |
| ENSMUSG000000113204 | -0,450 | 0,010 Gm46430       | ENSMUSG00000019851  | -1,180 | 0,001 Perp          |
| ENSMUSG00000005682  | -0,450 | 0,001 Pan2          | ENSMUSG00000028392  | -1,182 | 0,005 Bspry         |
| ENSMUSG00000040746  | -0,450 | 0,002 Rnf167        | ENSMUSG00000081683  | -1,182 | 0,000 Fzd10         |
| ENSMUSG00000032352  | -0,451 | 0,027 Lrrc1         | ENSMUSG00000042489  | -1,184 | 0,000 Clspn         |
| ENSMUSG00000096687  | -0,451 | 0,003 Mfsd4b4       | ENSMUSG00000046179  | -1,190 | 0,000 E2f8          |
| ENSMUSG00000050666  | -0,452 | 0,048 Vstm4         | ENSMUSG00000026669  | -1,198 | 0,000 Mcm10         |
| ENSMUSG00000063145  | -0,452 | 0,001 Bbs5          | ENSMUSG00000030708  | -1,202 | 0,000 Dnajb13       |
| ENSMUSG000000042606 | -0,452 | 0,002 Hirip3        | ENSMUSG00000018427  | -1,218 | 0,000 Ypel2         |
| ENSMUSG00000039473  | -0,452 | 0,006 Ubn1          | ENSMUSG00000022676  | -1,225 | 0,015 Snai2         |
| ENSMUSG00000004565  | -0,453 | 0,000 Pnpla6        | ENSMUSG00000086015  | -1,237 | 0,013 4833417C18Rik |
| ENSMUSG00000000078  | -0,453 | 0,032 Klf6          | ENSMUSG00000042988  | -1,242 | 0,000 Notum         |
| ENSMUSG00000026991  | -0,453 | 0,003 Pkp4          | ENSMUSG00000052374  | -1,247 | 0,021 Actn2         |
| ENSMUSG00000029676  | -0,453 | 0,000 Pot1a         | ENSMUSG00000043020  | -1,261 | 0,001 Wdr63         |
| ENSMUSG00000025203  | -0,454 | 0,039 Scd2          | ENSMUSG00000097519  | -1,269 | 0,004 4930558J18Rik |
| ENSMUSG000000037366 | -0,455 | 0,000 Pafah2        | ENSMUSG00000025504  | -1,282 | 0,004 Eps8l2        |
| ENSMUSG00000021306  | -0,455 | 0,005 Gpr137b       | ENSMUSG00000024990  | -1,284 | 0,028 Rbp4          |
| ENSMUSG00000048109  | -0,456 | 0,013 Rbm15         | ENSMUSG00000025916  | -1,306 | 0,029 Ppp1r42       |
| ENSMUSG00000026017  | -0,457 | 0,028 Carf          | ENSMUSG00000042498  | -1,311 | 0,029 D330045A20Rik |
| ENSMUSG00000035944  | -0,457 | 0,000 Ttc38         | ENSMUSG00000020151  | -1,314 | 0,003 Ptprr         |
| ENSMUSG00000020290  | -0,457 | 0,029 Xpo1          | ENSMUSG00000026870  | -1,324 | 0,024 Cutal         |
| ENSMUSG00000029647  | -0,458 | 0,002 Pan3          | ENSMUSG00000045498  | -1,336 | 0,019 Pcdhb3        |
| ENSMUSG000000024206 | -0,459 | 0,037 Rfx2          | ENSMUSG00000039252  | -1,343 | 0,004 Lgi2          |
| ENSMUSG00000022840  | -0,459 | 0,033 Adcy5         | ENSMUSG00000022780  | -1,346 | 0,033 Melff         |
| ENSMUSG00000042202  | -0,460 | 0,009 Slc35e2       | ENSMUSG00000070583  | -1,348 | 0,039 Fv1           |
| ENSMUSG00000023977  | -0,460 | 0,022 Ubr2          | ENSMUSG00000026778  | -1,353 | 0,000 Prkcq         |
| ENSMUSG00000033446  | -0,460 | 0,027 Lpar6         | ENSMUSG000000105954 | -1,354 | 0,001 Gm42793       |
| ENSMUSG00000053799  | -0,461 | 0,006 Exoc6         | ENSMUSG00000036186  | -1,355 | 0,000 Fam69b        |
| ENSMUSG00000024975  | -0,461 | 0,000 Pcd4          | ENSMUSG00000037846  | -1,368 | 0,000 Rtkn2         |
| ENSMUSG000000064128 | -0,461 | 0,002 Cenpj         | ENSMUSG00000046818  | -1,384 | 0,000 Ddit4l        |
| ENSMUSG00000039089  | -0,462 | 0,010 L3mbtl3       | ENSMUSG00000017400  | -1,427 | 0,001 Stac2         |
| ENSMUSG00000062822  | -0,463 | 0,001 4833420G17Rik | ENSMUSG00000041479  | -1,427 | 0,000 Syt15         |
| ENSMUSG00000025758  | -0,464 | 0,030 Plk4          | ENSMUSG00000067547  | -1,428 | 0,041 Gm7666        |
| ENSMUSG00000040818  | -0,464 | 0,010 Dennd6a       | ENSMUSG00000081600  | -1,461 | 0,022 Gm12286       |
| ENSMUSG00000034487  | -0,465 | 0,000 Kdelc2        | ENSMUSG00000011463  | -1,507 | 0,015 AC027700.1    |
| ENSMUSG00000038205  | -0,466 | 0,002 Prkab2        | ENSMUSG00000040231  | -1,538 | 0,022 Syngr4        |
| ENSMUSG000000031974 | -0,467 | 0,002 Abcb10        | ENSMUSG00000022262  | -1,541 | 0,025 Dnah5         |
| ENSMUSG00000050910  | -0,468 | 0,017 Cdr2l         | ENSMUSG00000024697  | -1,542 | 0,013 Gna14         |
| ENSMUSG00000031767  | -0,468 | 0,028 Nudt7         | ENSMUSG00000090291  | -1,563 | 0,002 Lrrc10b       |
| ENSMUSG00000057193  | -0,468 | 0,002 Slc44a2       | ENSMUSG00000021678  | -1,563 | 0,013 F2rl1         |

|                      |        |                     |                     |        |                     |
|----------------------|--------|---------------------|---------------------|--------|---------------------|
| ENSMUSG00000039787   | -0,469 | 0,001 Cercam        | ENSMUSG00000045259  | -1,563 | 0,014 Klhdc9        |
| ENSMUSG00000068551   | -0,469 | 0,000 Zfp467        | ENSMUSG00000005320  | -1,580 | 0,002 Fgfr4         |
| ENSMUSG00000025277   | -0,469 | 0,000 Abhd6         | ENSMUSG00000026890  | -1,597 | 0,000 Lhx6          |
| ENSMUSG00000020070   | -0,469 | 0,031 Rufy2         | ENSMUSG000000108841 | -1,597 | 0,015 Frmpd2        |
| ENSMUSG00000033565   | -0,469 | 0,009 Rbfox2        | ENSMUSG000000058743 | -1,620 | 0,000 Kcnj14        |
| ENSMUSG00000024897   | -0,470 | 0,038 Apba1         | ENSMUSG000000043719 | -1,620 | 0,004 Col6a6        |
| ENSMUSG00000049588   | -0,470 | 0,039 Ccdc69        | ENSMUSG00000038756  | -1,645 | 0,010 Ttl6          |
| ENSMUSG00000048232   | -0,470 | 0,000 Fbxo10        | ENSMUSG00000018126  | -1,647 | 0,000 Baiap2l2      |
| ENSMUSG000000042213  | -0,470 | 0,040 Zfand4        | ENSMUSG000000046480 | -1,662 | 0,006 Scn4b         |
| ENSMUSG000000032121  | -0,471 | 0,002 Tmem218       | ENSMUSG00000045362  | -1,663 | 0,016 Tnfrsf26      |
| ENSMUSG00000029385   | -0,471 | 0,007 Ccng2         | ENSMUSG00000085555  | -1,682 | 0,048 2610035F20Rik |
| ENSMUSG00000026317   | -0,472 | 0,001 Cln8          | ENSMUSG00000049872  | -1,703 | 0,003 Fam26e        |
| ENSMUSG00000021481   | -0,472 | 0,000 Zfp346        | ENSMUSG00000035551  | -1,714 | 0,047 Igfbp1        |
| ENSMUSG000000031145  | -0,472 | 0,003 Prickle3      | ENSMUSG000000097760 | -1,714 | 0,019 6030442K20Rik |
| ENSMUSG00000029521   | -0,472 | 0,001 Chek2         | ENSMUSG00000039313  | -1,721 | 0,000 AF529169      |
| ENSMUSG000000047003  | -0,473 | 0,036 Zfp41         | ENSMUSG000000075256 | -1,814 | 0,003 Cerkl         |
| ENSMUSG00000019303   | -0,473 | 0,024 Psmc3ip       | ENSMUSG000000104347 | -1,861 | 0,026 Gm37689       |
| ENSMUSG000000020130  | -0,473 | 0,010 Tbc1d15       | ENSMUSG000000108778 | -1,890 | 0,020 Gm20083       |
| ENSMUSG000000021120  | -0,473 | 0,000 Pigh          | ENSMUSG000000090399 | -1,898 | 0,001 Gm38399       |
| ENSMUSG000000048271  | -0,474 | 0,045 Rbm33         | ENSMUSG000000074461 | -1,954 | 0,022 Gm10699       |
| ENSMUSG000000021806  | -0,474 | 0,015 Nid2          | ENSMUSG00000033805  | -1,969 | 0,030 Ephx4         |
| ENSMUSG000000067199  | -0,474 | 0,036 Frat1         | ENSMUSG000000106590 | -2,010 | 0,015 Gm42879       |
| ENSMUSG000000062198  | -0,474 | 0,012 2700097O09Rik | ENSMUSG000000024517 | -2,064 | 0,027 Grp           |
| ENSMUSG000000021597  | -0,474 | 0,016 Sif1          | ENSMUSG00000046321  | -2,102 | 0,000 Hs3st2        |
| ENSMUSG00000000282   | -0,476 | 0,003 Mnt           | ENSMUSG00000032291  | -2,165 | 0,001 Crabp1        |
| ENSMUSG000000037466  | -0,476 | 0,005 Tedc1         | ENSMUSG000000115388 | -2,217 | 0,031 EPPK1         |
| ENSMUSG000000032594  | -0,477 | 0,000 Ip6k1         | ENSMUSG000000112808 | -2,242 | 0,000 Gm4739        |
| ENSMUSG000000051224  | -0,477 | 0,032 Tceanc        | ENSMUSG00000027224  | -2,429 | 0,047 Duoxa1        |
| ENSMUSG000000022021  | -0,477 | 0,014 Diaph3        | ENSMUSG00000014453  | -2,451 | 0,010 Blk           |
| ENSMUSG0000000063605 | -0,478 | 0,011 Ccdc102a      | ENSMUSG000000026012 | -2,486 | 0,000 Cd28          |
| ENSMUSG000000049411  | -0,478 | 0,005 Tmem241       | ENSMUSG000000085783 | -2,546 | 0,008 Gm9816        |
| ENSMUSG000000040435  | -0,478 | 0,003 Ppp1r15a      | ENSMUSG00000018486  | -2,674 | 0,012 Wnt9b         |
| ENSMUSG000000021250  | -0,479 | 0,043 Fos           | ENSMUSG000000109896 | -2,798 | 0,017 Gm31409       |
| ENSMUSG000000082163  | -0,479 | 0,011 Gm14276       | ENSMUSG00000038775  | -3,000 | 0,000 Vill          |
| ENSMUSG000000022799  | -0,480 | 0,041 Arhgap31      | ENSMUSG00000029431  | -3,005 | 0,012 B3gnt4        |
| ENSMUSG000000037885  | -0,480 | 0,019 Stk35         | ENSMUSG000000085882 | -3,451 | 0,004 2610507I01Rik |
| ENSMUSG0000000030522 | -0,481 | 0,001 Mtmr10        | ENSMUSG000000039628 | -3,605 | 0,012 Hs3st6        |
| ENSMUSG000000048458  | -0,481 | 0,017 Fam212b       | ENSMUSG00000022342  | -4,357 | 0,034 Kcnv1         |
| ENSMUSG000000002814  | -0,483 | 0,001 Top3a         | ENSMUSG000000021590 | -5,224 | 0,022 Spata9        |
| ENSMUSG000000061882  | -0,484 | 0,050 Ccdc62        |                     |        |                     |
| ENSMUSG000000055923  | -0,485 | 0,001 Aasdh         |                     |        |                     |
| ENSMUSG000000022701  | -0,485 | 0,000 Ccdc191       |                     |        |                     |
| ENSMUSG000000058486  | -0,486 | 0,000 Wdr91         |                     |        |                     |
| ENSMUSG0000000026792 | -0,486 | 0,000 Lrsam1        |                     |        |                     |
| ENSMUSG000000051790  | -0,486 | 0,004 Nlgn2         |                     |        |                     |
| ENSMUSG000000034247  | -0,486 | 0,000 Plekhm1       |                     |        |                     |
| ENSMUSG000000005615  | -0,486 | 0,002 Pcy1a         |                     |        |                     |

|                     |        |                     |
|---------------------|--------|---------------------|
| ENSMUSG00000019564  | -0,487 | 0,010 Arid3a        |
| ENSMUSG00000006850  | -0,487 | 0,000 Tmco6         |
| ENSMUSG000000033902 | -0,487 | 0,009 Mapkbp1       |
| ENSMUSG000000020868 | -0,487 | 0,000 Xylt2         |
| ENSMUSG000000029769 | -0,487 | 0,015 Ccdc136       |
| ENSMUSG000000057110 | -0,488 | 0,000 Cntrl         |
| ENSMUSG000000056919 | -0,488 | 0,012 Cep162        |
| ENSMUSG000000032826 | -0,488 | 0,043 Ank2          |
| ENSMUSG000000027959 | -0,488 | 0,008 Sass6         |
| ENSMUSG000000036561 | -0,489 | 0,000 Ppp6r2        |
| ENSMUSG000000022521 | -0,489 | 0,048 Crebbp        |
| ENSMUSG000000043487 | -0,489 | 0,013 Acot6         |
| ENSMUSG000000047907 | -0,489 | 0,045 Tshz2         |
| ENSMUSG000000058290 | -0,490 | 0,005 Esp1          |
| ENSMUSG000000047789 | -0,490 | 0,000 Slc38a9       |
| ENSMUSG000000024525 | -0,490 | 0,000 Impa2         |
| ENSMUSG000000024151 | -0,490 | 0,000 Msh2          |
| ENSMUSG000000028696 | -0,490 | 0,027 Ipp           |
| ENSMUSG000000022179 | -0,490 | 0,000 4931414P19Rik |
| ENSMUSG000000043262 | -0,491 | 0,033 Uevld         |
| ENSMUSG000000038685 | -0,491 | 0,000 Rtel1         |
| ENSMUSG000000025049 | -0,492 | 0,002 Taf5          |
| ENSMUSG000000022453 | -0,493 | 0,017 Naga          |
| ENSMUSG000000029687 | -0,493 | 0,000 Ezh2          |
| ENSMUSG000000030641 | -0,495 | 0,020 Ddias         |
| ENSMUSG000000026708 | -0,496 | 0,009 Cenpl         |
| ENSMUSG000000025648 | -0,497 | 0,000 Pfkfb4        |
| ENSMUSG000000038949 | -0,497 | 0,004 Cnst          |
| ENSMUSG000000035172 | -0,498 | 0,000 Plekhh3       |
| ENSMUSG000000035597 | -0,498 | 0,019 Prpf39        |
| ENSMUSG000000045790 | -0,500 | 0,028 Ccdc149       |
| ENSMUSG000000042616 | -0,500 | 0,017 Oscp1         |
| ENSMUSG000000026042 | -0,501 | 0,046 Col5a2        |
| ENSMUSG000000036854 | -0,501 | 0,000 Hspb6         |
| ENSMUSG000000073791 | -0,501 | 0,007 Efcab7        |
| ENSMUSG00000005958  | -0,501 | 0,004 Ephb3         |
| ENSMUSG000000005686 | -0,501 | 0,049 Ampd3         |
| ENSMUSG000000027784 | -0,501 | 0,035 Ppm1l         |
| ENSMUSG000000039328 | -0,502 | 0,000 Rnf122        |
| ENSMUSG000000039349 | -0,502 | 0,026 C130074G19Rik |
| ENSMUSG000000035125 | -0,503 | 0,000 Gcfc2         |
| ENSMUSG000000033016 | -0,503 | 0,013 Nfatc1        |
| ENSMUSG000000035967 | -0,503 | 0,012 Ints6l        |
| ENSMUSG000000056367 | -0,503 | 0,020 Actr3b        |
| ENSMUSG000000051705 | -0,503 | 0,025 Senp8         |
| ENSMUSG000000039686 | -0,503 | 0,000 Zer1          |
| ENSMUSG00000006464  | -0,504 | 0,029 Bbs1          |

|                     |        |                |
|---------------------|--------|----------------|
| ENSMUSG00000029468  | -0,504 | 0,004 P2rx7    |
| ENSMUSG00000026840  | -0,504 | 0,047 Lamc3    |
| ENSMUSG00000041762  | -0,504 | 0,019 Gpr155   |
| ENSMUSG00000021725  | -0,505 | 0,002 Parp8    |
| ENSMUSG00000019823  | -0,506 | 0,000 Mical1   |
| ENSMUSG00000038422  | -0,506 | 0,031 Hdhd3    |
| ENSMUSG00000041775  | -0,506 | 0,008 Mapk1ip1 |
| ENSMUSG00000033124  | -0,506 | 0,000 Atg9a    |
| ENSMUSG00000040084  | -0,507 | 0,045 Bub1b    |
| ENSMUSG00000058997  | -0,507 | 0,001 Vwa8     |
| ENSMUSG00000026955  | -0,508 | 0,017 Sapcd2   |
| ENSMUSG00000029363  | -0,508 | 0,001 Rfc5     |
| ENSMUSG00000029910  | -0,508 | 0,000 Mad2l1   |
| ENSMUSG00000048546  | -0,509 | 0,015 Tob2     |
| ENSMUSG00000025265  | -0,510 | 0,002 Fgd1     |
| ENSMUSG00000038047  | -0,510 | 0,018 Haus6    |
| ENSMUSG00000020212  | -0,510 | 0,043 Mdm1     |
| ENSMUSG00000020100  | -0,510 | 0,040 Slc29a3  |
| ENSMUSG00000038593  | -0,511 | 0,000 Tctn1    |
| ENSMUSG00000028133  | -0,511 | 0,003 Rwd3     |
| ENSMUSG00000006920  | -0,511 | 0,000 Ezh1     |
| ENSMUSG00000037526  | -0,511 | 0,001 Atg14    |
| ENSMUSG00000023186  | -0,512 | 0,050 Vwa5a    |
| ENSMUSG00000036864  | -0,512 | 0,000 Proser3  |
| ENSMUSG00000051586  | -0,512 | 0,007 Mical3   |
| ENSMUSG00000062312  | -0,512 | 0,034 Erbb2    |
| ENSMUSG000000069206 | -0,512 | 0,032 Zfp874a  |
| ENSMUSG00000085241  | -0,512 | 0,018 Snhg3    |
| ENSMUSG00000041328  | -0,513 | 0,028 Pcf11    |
| ENSMUSG00000020937  | -0,514 | 0,036 Plcd3    |
| ENSMUSG00000036882  | -0,514 | 0,001 Arhgap33 |
| ENSMUSG00000046311  | -0,514 | 0,013 Zfp62    |
| ENSMUSG00000036528  | -0,514 | 0,000 Ppfibp2  |
| ENSMUSG00000037415  | -0,515 | 0,000 Ranbp10  |
| ENSMUSG00000074364  | -0,515 | 0,008 Ehd2     |
| ENSMUSG00000038215  | -0,515 | 0,000 Cep44    |
| ENSMUSG00000040621  | -0,515 | 0,000 Gemin8   |
| ENSMUSG00000047881  | -0,515 | 0,000 Rell1    |
| ENSMUSG00000056019  | -0,516 | 0,018 Zfp709   |
| ENSMUSG00000047786  | -0,516 | 0,016 Lix1     |
| ENSMUSG00000043987  | -0,516 | 0,002 Cep164   |
| ENSMUSG00000040272  | -0,516 | 0,000 Accs     |
| ENSMUSG00000028082  | -0,517 | 0,033 Sh3d19   |
| ENSMUSG00000050022  | -0,517 | 0,003 Amz1     |
| ENSMUSG00000039485  | -0,518 | 0,015 Tspyl4   |
| ENSMUSG00000074785  | -0,518 | 0,044 Plxnc1   |
| ENSMUSG00000073705  | -0,518 | 0,036 Cenps    |



|                      |        |                |
|----------------------|--------|----------------|
| ENSMUSG00000020653   | -0,519 | 0,013 Klf11    |
| ENSMUSG000000039157  | -0,520 | 0,002 Fam102a  |
| ENSMUSG000000041000  | -0,520 | 0,000 Trim62   |
| ENSMUSG000000019992  | -0,520 | 0,042 Mtfr2    |
| ENSMUSG000000001521  | -0,520 | 0,001 Tulp3    |
| ENSMUSG0000000028068 | -0,521 | 0,008 Iqgap3   |
| ENSMUSG000000027381  | -0,521 | 0,003 Bcl2l11  |
| ENSMUSG000000024866  | -0,521 | 0,019 Acy3     |
| ENSMUSG0000000025352 | -0,522 | 0,039 Gdf11    |
| ENSMUSG000000029670  | -0,522 | 0,000 Ing3     |
| ENSMUSG000000043885  | -0,523 | 0,045 Slc36a4  |
| ENSMUSG000000044548  | -0,523 | 0,039 Dact1    |
| ENSMUSG0000000053985 | -0,524 | 0,005 Zfp14    |
| ENSMUSG000000021895  | -0,525 | 0,012 Arhgef3  |
| ENSMUSG000000023972  | -0,525 | 0,003 Ptk7     |
| ENSMUSG0000000028698 | -0,525 | 0,010 Pik3r3   |
| ENSMUSG0000000050855 | -0,526 | 0,011 Zfp940   |
| ENSMUSG000000029730  | -0,526 | 0,000 Mcm7     |
| ENSMUSG000000026098  | -0,526 | 0,001 Pms1     |
| ENSMUSG0000000073557 | -0,527 | 0,024 Ppp1r12b |
| ENSMUSG000000107499  | -0,527 | 0,016 Ccdc142  |
| ENSMUSG000000026333  | -0,528 | 0,008 Gin1     |
| ENSMUSG0000000040204 | -0,528 | 0,027 Pclaf    |
| ENSMUSG0000000030257 | -0,528 | 0,027 Srgap3   |
| ENSMUSG000000009145  | -0,529 | 0,028 Dqx1     |
| ENSMUSG000000021514  | -0,529 | 0,003 Zfp369   |
| ENSMUSG0000000026409 | -0,529 | 0,035 Pfkfb2   |
| ENSMUSG000000002475  | -0,529 | 0,001 Abhd3    |
| ENSMUSG000000041935  | -0,530 | 0,028 AW549877 |
| ENSMUSG0000000060657 | -0,530 | 0,010 Marf1    |
| ENSMUSG0000000035266 | -0,530 | 0,000 Helq     |
| ENSMUSG0000000054737 | -0,530 | 0,018 Zfp182   |
| ENSMUSG0000000039239 | -0,531 | 0,045 Tgfb2    |
| ENSMUSG0000000040312 | -0,531 | 0,001 Cchcr1   |
| ENSMUSG0000000071281 | -0,531 | 0,036 Zfp65    |
| ENSMUSG000000041594  | -0,531 | 0,001 Tmtc4    |
| ENSMUSG0000000025907 | -0,532 | 0,005 Rb1cc1   |
| ENSMUSG000000000693  | -0,532 | 0,000 Loxl3    |
| ENSMUSG000000025348  | -0,533 | 0,009 Itga7    |
| ENSMUSG0000000078794 | -0,534 | 0,000 Dact3    |
| ENSMUSG0000000028469 | -0,534 | 0,017 Npr2     |
| ENSMUSG000000027353  | -0,534 | 0,008 Mcm8     |
| ENSMUSG000000028212  | -0,534 | 0,042 Ccne2    |
| ENSMUSG0000000039103 | -0,535 | 0,046 Nexn     |
| ENSMUSG000000042744  | -0,536 | 0,045 Hectd4   |
| ENSMUSG000000000276  | -0,536 | 0,037 Dgke     |
| ENSMUSG000000027203  | -0,536 | 0,017 Dut      |

|                     |        |                     |
|---------------------|--------|---------------------|
| ENSMUSG00000034311  | -0,536 | 0,020 Kif4          |
| ENSMUSG00000028051  | -0,537 | 0,034 Hcn3          |
| ENSMUSG00000112095  | -0,537 | 0,000 A130077B15Rik |
| ENSMUSG00000031669  | -0,538 | 0,000 Gins3         |
| ENSMUSG00000033790  | -0,539 | 0,012 Tubgcp5       |
| ENSMUSG00000010051  | -0,539 | 0,038 Hyal1         |
| ENSMUSG00000064105  | -0,539 | 0,000 Cnnm2         |
| ENSMUSG00000032741  | -0,539 | 0,000 Tpcn1         |
| ENSMUSG00000046688  | -0,539 | 0,004 Tifa          |
| ENSMUSG00000022994  | -0,540 | 0,000 Adcy6         |
| ENSMUSG00000027331  | -0,540 | 0,040 Knstrn        |
| ENSMUSG00000026456  | -0,540 | 0,005 Cyb5r1        |
| ENSMUSG00000076435  | -0,541 | 0,003 Acsf2         |
| ENSMUSG00000022843  | -0,542 | 0,003 Clcn2         |
| ENSMUSG00000037455  | -0,542 | 0,000 Slc18b1       |
| ENSMUSG00000029401  | -0,542 | 0,026 Rilpl2        |
| ENSMUSG00000023947  | -0,542 | 0,004 Nfkbie        |
| ENSMUSG00000059713  | -0,542 | 0,000 Rcan3         |
| ENSMUSG00000007646  | -0,542 | 0,001 Rad51c        |
| ENSMUSG00000070425  | -0,544 | 0,000 Xntrpc        |
| ENSMUSG00000056832  | -0,544 | 0,049 Ttc26         |
| ENSMUSG00000014850  | -0,544 | 0,000 Msh3          |
| ENSMUSG00000030337  | -0,544 | 0,005 Vamp1         |
| ENSMUSG00000024036  | -0,544 | 0,012 Slc37a1       |
| ENSMUSG00000033306  | -0,545 | 0,025 Lpp           |
| ENSMUSG00000032652  | -0,545 | 0,000 Crebl2        |
| ENSMUSG00000037151  | -0,547 | 0,001 Lrrc20        |
| ENSMUSG00000046157  | -0,547 | 0,001 Tmem229b      |
| ENSMUSG00000055200  | -0,547 | 0,000 Sertad3       |
| ENSMUSG000000089715 | -0,547 | 0,000 Cbx6          |
| ENSMUSG00000030978  | -0,548 | 0,000 Rrm1          |
| ENSMUSG00000031310  | -0,548 | 0,001 Zmym3         |
| ENSMUSG00000022822  | -0,548 | 0,001 Abcc5         |
| ENSMUSG00000039831  | -0,549 | 0,039 Arhgap29      |
| ENSMUSG00000078495  | -0,549 | 0,016 Zfp984        |
| ENSMUSG00000055897  | -0,549 | 0,003 Ppp4r1l-ps    |
| ENSMUSG00000072653  | -0,549 | 0,001 Zfp783        |
| ENSMUSG00000037818  | -0,549 | 0,008 Abhd18        |
| ENSMUSG00000027715  | -0,550 | 0,017 Ccna2         |
| ENSMUSG00000032718  | -0,550 | 0,043 Mansc1        |
| ENSMUSG00000028621  | -0,550 | 0,000 Cyb5r1        |
| ENSMUSG0000001138   | -0,550 | 0,000 Cnnm3         |
| ENSMUSG00000033857  | -0,550 | 0,000 Engase        |
| ENSMUSG00000038010  | -0,551 | 0,008 Ccdc138       |
| ENSMUSG00000060227  | -0,551 | 0,044 Casc4         |
| ENSMUSG00000038126  | -0,551 | 0,018 Mphosph9      |
| ENSMUSG00000032555  | -0,552 | 0,008 Topbp1        |

|                     |        |                     |
|---------------------|--------|---------------------|
| ENSMUSG00000027217  | -0,552 | 0,027 Tspan18       |
| ENSMUSG00000000823  | -0,552 | 0,002 Zfp512b       |
| ENSMUSG00000059708  | -0,552 | 0,042 Akap17b       |
| ENSMUSG00000034522  | -0,552 | 0,001 Zfp395        |
| ENSMUSG00000052917  | -0,552 | 0,031 Senp7         |
| ENSMUSG00000017639  | -0,553 | 0,005 Rab11fip4     |
| ENSMUSG00000043496  | -0,553 | 0,024 Tril          |
| ENSMUSG00000035547  | -0,554 | 0,002 Capn5         |
| ENSMUSG00000030643  | -0,554 | 0,049 Rab30         |
| ENSMUSG00000028088  | -0,554 | 0,001 Fmo5          |
| ENSMUSG00000039853  | -0,555 | 0,023 Trim14        |
| ENSMUSG00000021747  | -0,555 | 0,023 4930452B06Rik |
| ENSMUSG00000045467  | -0,556 | 0,036 Tll113        |
| ENSMUSG00000018931  | -0,556 | 0,000 Natd1         |
| ENSMUSG00000001741  | -0,557 | 0,020 Il16          |
| ENSMUSG000000032850 | -0,557 | 0,002 Rnf2          |
| ENSMUSG00000004085  | -0,557 | 0,002 Map3k20       |
| ENSMUSG00000027589  | -0,557 | 0,047 Pcmt2         |
| ENSMUSG00000022756  | -0,558 | 0,002 Slc7a4        |
| ENSMUSG00000047804  | -0,558 | 0,019 Akap10        |
| ENSMUSG00000005410  | -0,558 | 0,001 Mcm5          |
| ENSMUSG00000027330  | -0,558 | 0,001 Cdc25b        |
| ENSMUSG00000032531  | -0,558 | 0,002 Amotl2        |
| ENSMUSG00000028944  | -0,558 | 0,000 Prkag2        |
| ENSMUSG00000015709  | -0,558 | 0,032 Arnt2         |
| ENSMUSG00000024423  | -0,559 | 0,001 Impact        |
| ENSMUSG00000028613  | -0,559 | 0,044 Lrp8          |
| ENSMUSG00000019947  | -0,559 | 0,032 Arid5b        |
| ENSMUSG00000046111  | -0,559 | 0,026 Cep295        |
| ENSMUSG00000043252  | -0,560 | 0,008 Tmem64        |
| ENSMUSG00000023505  | -0,560 | 0,024 Cdca3         |
| ENSMUSG00000055799  | -0,560 | 0,003 Tcf7l1        |
| ENSMUSG00000033594  | -0,560 | 0,007 Spata2l       |
| ENSMUSG00000029009  | -0,560 | 0,001 Mthfr         |
| ENSMUSG00000027469  | -0,561 | 0,008 Tpx2          |
| ENSMUSG00000055963  | -0,562 | 0,014 Triqk         |
| ENSMUSG00000038618  | -0,562 | 0,004 Rassf7        |
| ENSMUSG00000025656  | -0,563 | 0,007 Arhgef9       |
| ENSMUSG00000021466  | -0,563 | 0,037 Ptch1         |
| ENSMUSG00000039497  | -0,563 | 0,007 Dse           |
| ENSMUSG00000020228  | -0,563 | 0,000 Helb          |
| ENSMUSG00000024121  | -0,563 | 0,002 Atp6v0c       |
| ENSMUSG00000026383  | -0,564 | 0,049 Epb41l5       |
| ENSMUSG00000033350  | -0,564 | 0,006 Chst2         |
| ENSMUSG00000020808  | -0,564 | 0,018 Pimreg        |
| ENSMUSG00000035683  | -0,564 | 0,014 Melk          |
| ENSMUSG00000028364  | -0,564 | 0,041 Tnc           |

|                      |        |                     |
|----------------------|--------|---------------------|
| ENSMUSG00000020541   | -0,566 | 0,007 Tom111        |
| ENSMUSG000000057835  | -0,566 | 0,029 Zfp119a       |
| ENSMUSG000000062510  | -0,566 | 0,002 Nsl1          |
| ENSMUSG000000053004  | -0,566 | 0,009 Hrh1          |
| ENSMUSG000000057914  | -0,566 | 0,041 Cacnb2        |
| ENSMUSG000000027457  | -0,567 | 0,025 Snph          |
| ENSMUSG000000025507  | -0,567 | 0,002 Pidd1         |
| ENSMUSG000000023015  | -0,567 | 0,015 Racgap1       |
| ENSMUSG0000000054115 | -0,568 | 0,000 Skp2          |
| ENSMUSG000000020900  | -0,570 | 0,029 Myh10         |
| ENSMUSG000000022758  | -0,570 | 0,013 P2rx6         |
| ENSMUSG000000034906  | -0,571 | 0,000 Ncaph         |
| ENSMUSG000000020592  | -0,572 | 0,003 Sdc1          |
| ENSMUSG000000107879  | -0,573 | 0,005 9330102E08Rik |
| ENSMUSG000000032086  | -0,573 | 0,001 Bace1         |
| ENSMUSG0000000022788 | -0,573 | 0,016 Fgd4          |
| ENSMUSG000000031133  | -0,573 | 0,003 Arhgef6       |
| ENSMUSG000000070000  | -0,573 | 0,000 Fcho1         |
| ENSMUSG000000034917  | -0,574 | 0,019 Tjp3          |
| ENSMUSG000000020914  | -0,574 | 0,020 Top2a         |
| ENSMUSG000000068299  | -0,575 | 0,000 Nat8f4        |
| ENSMUSG000000019813  | -0,575 | 0,000 Cep57l1       |
| ENSMUSG0000000087408 | -0,575 | 0,003 Cers1         |
| ENSMUSG000000002346  | -0,575 | 0,001 Slc25a42      |
| ENSMUSG000000078942  | -0,576 | 0,010 Naip6         |
| ENSMUSG000000079304  | -0,577 | 0,020 Tex52         |
| ENSMUSG000000049323  | -0,577 | 0,040 Smcr8         |
| ENSMUSG000000044338  | -0,577 | 0,049 Aplnr         |
| ENSMUSG000000070808  | -0,579 | 0,001 Bicra         |
| ENSMUSG000000038576  | -0,580 | 0,010 Susd4         |
| ENSMUSG000000043290  | -0,580 | 0,000 Zfp784        |
| ENSMUSG000000032221  | -0,580 | 0,042 Mns1          |
| ENSMUSG000000036986  | -0,580 | 0,001 Pml           |
| ENSMUSG000000026034  | -0,581 | 0,000 Clk1          |
| ENSMUSG000000027490  | -0,581 | 0,000 E2f1          |
| ENSMUSG000000037243  | -0,581 | 0,008 Zfp692        |
| ENSMUSG0000000020176 | -0,581 | 0,006 Grb10         |
| ENSMUSG000000040606  | -0,581 | 0,031 Kazn          |
| ENSMUSG000000051098  | -0,582 | 0,018 Mblac2        |
| ENSMUSG000000032194  | -0,582 | 0,001 Kank2         |
| ENSMUSG000000014496  | -0,582 | 0,019 Ankrd28       |
| ENSMUSG000000031478  | -0,582 | 0,000 Nek3          |
| ENSMUSG000000041777  | -0,582 | 0,001 Cir1          |
| ENSMUSG0000000034317 | -0,583 | 0,001 Trim59        |
| ENSMUSG000000042647  | -0,583 | 0,010 Acad12        |
| ENSMUSG000000034379  | -0,583 | 0,007 Wdr5b         |
| ENSMUSG000000027669  | -0,584 | 0,000 Gnb4          |

|                     |        |                     |
|---------------------|--------|---------------------|
| ENSMUSG00000044350  | -0,584 | 0,010 Lacc1         |
| ENSMUSG000000031756 | -0,585 | 0,001 Cenpn         |
| ENSMUSG000000050394 | -0,585 | 0,000 Armcx6        |
| ENSMUSG000000074863 | -0,585 | 0,005 Platr25       |
| ENSMUSG000000030279 | -0,585 | 0,000 C2cd5         |
| ENSMUSG000000066647 | -0,587 | 0,006 Gm5113        |
| ENSMUSG000000035759 | -0,588 | 0,031 Bbs10         |
| ENSMUSG000000028445 | -0,588 | 0,030 Enho          |
| ENSMUSG000000022091 | -0,588 | 0,000 Sorbs3        |
| ENSMUSG000000059146 | -0,588 | 0,031 Ntrk3         |
| ENSMUSG000000021838 | -0,589 | 0,038 Samd4         |
| ENSMUSG000000068036 | -0,589 | 0,034 Afdn          |
| ENSMUSG000000025241 | -0,589 | 0,043 Fyco1         |
| ENSMUSG000000038943 | -0,590 | 0,003 Prc1          |
| ENSMUSG000000020492 | -0,590 | 0,000 Ska2          |
| ENSMUSG000000027641 | -0,590 | 0,046 Rbl1          |
| ENSMUSG000000038370 | -0,591 | 0,027 Pcp4l1        |
| ENSMUSG000000032586 | -0,591 | 0,000 Traip         |
| ENSMUSG000000037295 | -0,592 | 0,000 Ldlrap1       |
| ENSMUSG000000006235 | -0,592 | 0,000 Epor          |
| ENSMUSG000000058070 | -0,593 | 0,008 Eml1          |
| ENSMUSG000000028073 | -0,593 | 0,000 Pear1         |
| ENSMUSG000000003031 | -0,593 | 0,000 Cdkn1b        |
| ENSMUSG000000026170 | -0,595 | 0,008 Cyp27a1       |
| ENSMUSG000000054850 | -0,595 | 0,003 Smim10l2a     |
| ENSMUSG000000025092 | -0,595 | 0,009 Hspa12a       |
| ENSMUSG000000050379 | -0,595 | 0,000 Sept6         |
| ENSMUSG000000093456 | -0,596 | 0,040 Gm20662       |
| ENSMUSG000000034647 | -0,596 | 0,012 Ankrd12       |
| ENSMUSG000000026556 | -0,596 | 0,002 Vangl2        |
| ENSMUSG000000079038 | -0,597 | 0,023 D130040H23Rik |
| ENSMUSG00000001300  | -0,597 | 0,023 Efnb2         |
| ENSMUSG000000039852 | -0,597 | 0,007 Rere          |
| ENSMUSG000000022945 | -0,598 | 0,002 Chaf1b        |
| ENSMUSG000000033031 | -0,598 | 0,016 C330027C09Rik |
| ENSMUSG000000023079 | -0,599 | 0,000 Gtf2ird1      |
| ENSMUSG000000042156 | -0,600 | 0,001 Dzip1         |
| ENSMUSG000000026489 | -0,601 | 0,000 Coq8a         |
| ENSMUSG000000060012 | -0,601 | 0,044 Kif13b        |
| ENSMUSG000000030630 | -0,601 | 0,018 Fah           |
| ENSMUSG000000025271 | -0,601 | 0,012 Pfkfb1        |
| ENSMUSG000000099689 | -0,601 | 0,021 Zfp383        |
| ENSMUSG000000020888 | -0,602 | 0,000 Dvl2          |
| ENSMUSG000000024039 | -0,602 | 0,048 Cbs           |
| ENSMUSG000000054939 | -0,602 | 0,029 Zfp174        |
| ENSMUSG000000063488 | -0,602 | 0,001 Zkscan7       |
| ENSMUSG000000020034 | -0,603 | 0,000 Tcp11l2       |



|                      |        |                     |
|----------------------|--------|---------------------|
| ENSMUSG00000061353   | -0,603 | 0,001 Cxcl12        |
| ENSMUSG00000054555   | -0,603 | 0,023 Adam12        |
| ENSMUSG00000028980   | -0,604 | 0,000 H6pd          |
| ENSMUSG00000002771   | -0,606 | 0,022 Grin2d        |
| ENSMUSG00000053062   | -0,607 | 0,013 Jam2          |
| ENSMUSG00000026211   | -0,607 | 0,026 Obs1          |
| ENSMUSG00000024867   | -0,608 | 0,012 Pip5k1b       |
| ENSMUSG00000067629   | -0,608 | 0,010 Syngap1       |
| ENSMUSG000000037235  | -0,608 | 0,000 Mxd4          |
| ENSMUSG00000027306   | -0,608 | 0,013 Nusap1        |
| ENSMUSG00000022422   | -0,609 | 0,006 Dsccl1        |
| ENSMUSG00000056735   | -0,609 | 0,010 A930024E05Rik |
| ENSMUSG00000035104   | -0,610 | 0,003 Eva1a         |
| ENSMUSG00000048327   | -0,610 | 0,005 Ckap2l        |
| ENSMUSG00000028496   | -0,610 | 0,001 Mlil3         |
| ENSMUSG000000029177  | -0,611 | 0,032 Cenpa         |
| ENSMUSG00000028312   | -0,611 | 0,035 Smc2          |
| ENSMUSG00000028989   | -0,611 | 0,016 Angptl7       |
| ENSMUSG000000032411  | -0,612 | 0,000 Tfdp2         |
| ENSMUSG000000061524  | -0,612 | 0,037 Zic2          |
| ENSMUSG00000030231   | -0,612 | 0,001 Plekha5       |
| ENSMUSG000000032198  | -0,612 | 0,000 Dock6         |
| ENSMUSG0000000031134 | -0,614 | 0,000 Rbmx          |
| ENSMUSG00000026944   | -0,614 | 0,002 Abca2         |
| ENSMUSG00000022385   | -0,615 | 0,003 Gtse1         |
| ENSMUSG00000000275   | -0,615 | 0,001 Trim25        |
| ENSMUSG000000001151  | -0,616 | 0,002 Pcnt          |
| ENSMUSG00000059013   | -0,616 | 0,000 Sh2d3c        |
| ENSMUSG00000026360   | -0,617 | 0,000 Rgs2          |
| ENSMUSG000000049521  | -0,617 | 0,001 Cdc42ep1      |
| ENSMUSG000000057133  | -0,617 | 0,024 Chd6          |
| ENSMUSG000000032750  | -0,617 | 0,009 Gab3          |
| ENSMUSG00000050410   | -0,618 | 0,000 Tcf19         |
| ENSMUSG000000097842  | -0,618 | 0,026 9330104G04Rik |
| ENSMUSG00000021009   | -0,618 | 0,002 Ptpn21        |
| ENSMUSG00000025085   | -0,619 | 0,015 Ablim1        |
| ENSMUSG000000030729  | -0,619 | 0,004 Pgm211        |
| ENSMUSG00000023411   | -0,620 | 0,016 Nfatc4        |
| ENSMUSG00000068115   | -0,621 | 0,000 Ninl          |
| ENSMUSG00000047153   | -0,621 | 0,000 Khnyn         |
| ENSMUSG00000041406   | -0,621 | 0,000 BC055324      |
| ENSMUSG00000035356   | -0,621 | 0,010 Nfkbiz        |
| ENSMUSG00000045333   | -0,621 | 0,016 Zfp423        |
| ENSMUSG000000031480  | -0,622 | 0,013 Thsd1         |
| ENSMUSG00000059810   | -0,622 | 0,000 Rgs3          |
| ENSMUSG00000097119   | -0,623 | 0,012 B230354K17Rik |
| ENSMUSG00000078153   | -0,624 | 0,014 Psme2b        |

|                     |        |                     |
|---------------------|--------|---------------------|
| ENSMUSG00000059839  | -0,624 | 0,001 Zfp874b       |
| ENSMUSG00000047409  | -0,624 | 0,000 Ctdspl        |
| ENSMUSG00000029851  | -0,625 | 0,044 Tcaf2         |
| ENSMUSG00000037725  | -0,625 | 0,001 Ckap2         |
| ENSMUSG00000006675  | -0,625 | 0,036 P4htm         |
| ENSMUSG00000024044  | -0,625 | 0,008 Epb41l3       |
| ENSMUSG00000025812  | -0,625 | 0,038 Pard3         |
| ENSMUSG00000071181  | -0,625 | 0,016 3830408C21Rik |
| ENSMUSG00000026676  | -0,625 | 0,015 Ccdc3         |
| ENSMUSG00000006219  | -0,626 | 0,044 Fblim1        |
| ENSMUSG00000038766  | -0,626 | 0,011 Gabpb2        |
| ENSMUSG00000022322  | -0,626 | 0,004 Shcbp1        |
| ENSMUSG00000006800  | -0,627 | 0,000 Sulf2         |
| ENSMUSG00000042810  | -0,627 | 0,000 Krba1         |
| ENSMUSG00000035455  | -0,627 | 0,004 Figl1         |
| ENSMUSG00000005949  | -0,627 | 0,000 Ctns          |
| ENSMUSG00000047115  | -0,629 | 0,024 Fam221a       |
| ENSMUSG00000022203  | -0,629 | 0,023 Efs           |
| ENSMUSG00000044317  | -0,629 | 0,005 Gpr4          |
| ENSMUSG00000035878  | -0,629 | 0,008 Hykk          |
| ENSMUSG00000016087  | -0,630 | 0,042 Fli1          |
| ENSMUSG00000078762  | -0,630 | 0,000 Haus5         |
| ENSMUSG00000020744  | -0,630 | 0,000 Slc25a19      |
| ENSMUSG00000022070  | -0,630 | 0,000 Bora          |
| ENSMUSG00000045751  | -0,631 | 0,000 Mms22l        |
| ENSMUSG00000066894  | -0,631 | 0,000 Vsig10        |
| ENSMUSG000000100254 | -0,631 | 0,007 Trpc2         |
| ENSMUSG00000097993  | -0,633 | 0,020 Ptprv         |
| ENSMUSG000000115022 | -0,633 | 0,000 Hacl1         |
| ENSMUSG000000037572 | -0,634 | 0,000 Wdhd1         |
| ENSMUSG00000030867  | -0,634 | 0,007 Plk1          |
| ENSMUSG00000041132  | -0,634 | 0,000 N4bp2l1       |
| ENSMUSG00000027698  | -0,635 | 0,000 Nceh1         |
| ENSMUSG00000024773  | -0,637 | 0,000 Atg2a         |
| ENSMUSG00000042510  | -0,637 | 0,000 AA986860      |
| ENSMUSG00000033596  | -0,638 | 0,000 Rfwd3         |
| ENSMUSG000000038156 | -0,638 | 0,038 Spon1         |
| ENSMUSG00000042320  | -0,638 | 0,005 Prox2         |
| ENSMUSG00000032641  | -0,639 | 0,000 Gpr19         |
| ENSMUSG00000025020  | -0,640 | 0,045 Slit1         |
| ENSMUSG00000030766  | -0,640 | 0,000 Arhgap17      |
| ENSMUSG00000036526  | -0,640 | 0,013 Card11        |
| ENSMUSG00000052684  | -0,641 | 0,000 Jun           |
| ENSMUSG000000069727 | -0,642 | 0,020 Zfp975        |
| ENSMUSG00000027827  | -0,642 | 0,049 Kcnab1        |
| ENSMUSG00000038143  | -0,643 | 0,044 Stox2         |
| ENSMUSG00000030213  | -0,644 | 0,007 Atf7ip        |

|                     |        |                |
|---------------------|--------|----------------|
| ENSMUSG00000038644  | -0,644 | 0,000 Pold1    |
| ENSMUSG00000030930  | -0,644 | 0,000 Chst15   |
| ENSMUSG00000057722  | -0,644 | 0,028 Lepr     |
| ENSMUSG00000071064  | -0,645 | 0,000 Zfp827   |
| ENSMUSG00000059851  | -0,645 | 0,000 Kmt5c    |
| ENSMUSG00000061751  | -0,645 | 0,014 Kalrn    |
| ENSMUSG00000031075  | -0,646 | 0,045 Ano1     |
| ENSMUSG00000021782  | -0,646 | 0,034 Dlg5     |
| ENSMUSG00000010064  | -0,646 | 0,000 Slc38a3  |
| ENSMUSG00000044337  | -0,646 | 0,000 Ackr3    |
| ENSMUSG00000087368  | -0,647 | 0,017 BC065397 |
| ENSMUSG00000040594  | -0,647 | 0,018 Ranbp17  |
| ENSMUSG00000002835  | -0,650 | 0,000 Chaf1a   |
| ENSMUSG00000078429  | -0,650 | 0,000 Ctdsp2   |
| ENSMUSG00000014329  | -0,650 | 0,025 Bicc1    |
| ENSMUSG00000046027  | -0,650 | 0,000 Stard5   |
| ENSMUSG00000062866  | -0,651 | 0,001 Phactr2  |
| ENSMUSG00000022364  | -0,651 | 0,000 Tbc1d31  |
| ENSMUSG00000014303  | -0,651 | 0,000 Glis2    |
| ENSMUSG000000020974 | -0,651 | 0,000 Pole2    |
| ENSMUSG00000001665  | -0,651 | 0,000 Gstt3    |
| ENSMUSG00000022177  | -0,652 | 0,001 Haus4    |
| ENSMUSG00000028005  | -0,653 | 0,016 Gucy1b3  |
| ENSMUSG00000006678  | -0,653 | 0,003 Pola1    |
| ENSMUSG00000071192  | -0,654 | 0,046 Wfikn1   |
| ENSMUSG00000053647  | -0,655 | 0,047 Gper1    |
| ENSMUSG00000040181  | -0,655 | 0,002 Fmo1     |
| ENSMUSG00000022836  | -0,656 | 0,042 Mylk     |
| ENSMUSG00000024883  | -0,656 | 0,027 Rin1     |
| ENSMUSG000000031666 | -0,657 | 0,001 Rbl2     |
| ENSMUSG00000064080  | -0,657 | 0,028 Fbln2    |
| ENSMUSG00000018809  | -0,659 | 0,000 Smyd4    |
| ENSMUSG00000037754  | -0,659 | 0,030 Ppp1r16b |
| ENSMUSG00000021884  | -0,659 | 0,000 Hacl1    |
| ENSMUSG00000029086  | -0,660 | 0,000 Prom1    |
| ENSMUSG00000042216  | -0,660 | 0,036 Sgsm1    |
| ENSMUSG00000026080  | -0,661 | 0,000 Chst10   |
| ENSMUSG00000025608  | -0,661 | 0,010 Podxl    |
| ENSMUSG00000054893  | -0,661 | 0,000 Zfp667   |
| ENSMUSG00000000901  | -0,661 | 0,000 Mmp11    |
| ENSMUSG00000049624  | -0,662 | 0,000 Slc17a5  |
| ENSMUSG00000030309  | -0,662 | 0,000 Caprin2  |
| ENSMUSG00000031379  | -0,662 | 0,018 Pir      |
| ENSMUSG00000079553  | -0,663 | 0,007 Kifc1    |
| ENSMUSG00000029869  | -0,663 | 0,001 Ephb6    |
| ENSMUSG00000051517  | -0,663 | 0,004 Arhgef39 |
| ENSMUSG00000034349  | -0,664 | 0,000 Smc4     |

|                     |        |                  |
|---------------------|--------|------------------|
| ENSMUSG00000035829  | -0,664 | 0,004 Ppp1r26    |
| ENSMUSG00000033458  | -0,664 | 0,022 Fan1       |
| ENSMUSG00000038252  | -0,664 | 0,000 Ncapd2     |
| ENSMUSG00000050397  | -0,666 | 0,042 Foxl2      |
| ENSMUSG00000029299  | -0,666 | 0,009 Abcg3      |
| ENSMUSG00000097242  | -0,666 | 0,018 Gm16907    |
| ENSMUSG00000030515  | -0,667 | 0,000 Tarsl2     |
| ENSMUSG00000014786  | -0,668 | 0,000 Slc9a5     |
| ENSMUSG00000024696  | -0,668 | 0,000 Lpxn       |
| ENSMUSG00000079481  | -0,668 | 0,012 Nhsl2      |
| ENSMUSG00000020652  | -0,668 | 0,000 Cenpo      |
| ENSMUSG00000037355  | -0,669 | 0,011 Uvssa      |
| ENSMUSG00000037736  | -0,669 | 0,004 Limch1     |
| ENSMUSG00000038332  | -0,669 | 0,000 Sesn1      |
| ENSMUSG00000027496  | -0,670 | 0,003 Aurka      |
| ENSMUSG00000028385  | -0,670 | 0,003 Snx30      |
| ENSMUSG00000036437  | -0,670 | 0,022 Npy1r      |
| ENSMUSG00000040860  | -0,671 | 0,000 Crocc      |
| ENSMUSG00000002007  | -0,672 | 0,001 Srpk3      |
| ENSMUSG00000025001  | -0,672 | 0,008 Hells      |
| ENSMUSG00000051344  | -0,673 | 0,011 Plekhm3    |
| ENSMUSG00000030677  | -0,673 | 0,017 Kif22      |
| ENSMUSG000000041219 | -0,673 | 0,025 Arhgap11a  |
| ENSMUSG00000024791  | -0,673 | 0,002 Cdca5      |
| ENSMUSG00000035992  | -0,673 | 0,035 Fnip1      |
| ENSMUSG00000031543  | -0,674 | 0,004 Ank1       |
| ENSMUSG00000031150  | -0,674 | 0,005 Ccdc120    |
| ENSMUSG00000032796  | -0,676 | 0,008 Lama1      |
| ENSMUSG00000033904  | -0,676 | 0,010 Ccp110     |
| ENSMUSG00000056458  | -0,677 | 0,000 Mok        |
| ENSMUSG00000039601  | -0,677 | 0,000 Rcan2      |
| ENSMUSG00000038022  | -0,678 | 0,000 Mindy4     |
| ENSMUSG00000030319  | -0,678 | 0,001 Cand2      |
| ENSMUSG00000048118  | -0,678 | 0,011 Arid4a     |
| ENSMUSG00000113425  | -0,679 | 0,046 AC159813.1 |
| ENSMUSG00000070822  | -0,679 | 0,000 Zscan18    |
| ENSMUSG00000040875  | -0,679 | 0,047 Osbpl10    |
| ENSMUSG00000108011  | -0,679 | 0,002 Gm44596    |
| ENSMUSG00000022464  | -0,680 | 0,044 Slc38a4    |
| ENSMUSG00000049404  | -0,681 | 0,018 Rarres1    |
| ENSMUSG00000030551  | -0,681 | 0,001 Nr2f2      |
| ENSMUSG00000028546  | -0,682 | 0,010 Elavl4     |
| ENSMUSG00000030539  | -0,683 | 0,001 Sema4b     |
| ENSMUSG00000040717  | -0,683 | 0,029 Il17rd     |
| ENSMUSG00000024989  | -0,684 | 0,015 Cep55      |
| ENSMUSG00000026683  | -0,684 | 0,000 Nuf2       |
| ENSMUSG00000036617  | -0,684 | 0,032 Etl4       |

|                     |        |                     |
|---------------------|--------|---------------------|
| ENSMUSG00000027883  | -0,684 | 0,000 Gpsm2         |
| ENSMUSG00000048058  | -0,685 | 0,008 Ldlrad3       |
| ENSMUSG00000021175  | -0,685 | 0,000 Cdca7l        |
| ENSMUSG00000034773  | -0,685 | 0,007 BC030867      |
| ENSMUSG00000022122  | -0,685 | 0,016 Ednrb         |
| ENSMUSG00000030380  | -0,687 | 0,003 Mzf1          |
| ENSMUSG00000021835  | -0,687 | 0,042 Bmp4          |
| ENSMUSG00000020649  | -0,687 | 0,000 Rrm2          |
| ENSMUSG00000029673  | -0,688 | 0,015 Auts2         |
| ENSMUSG00000034471  | -0,688 | 0,001 Caskin2       |
| ENSMUSG00000027811  | -0,689 | 0,000 4930579G24Rik |
| ENSMUSG00000021198  | -0,689 | 0,022 Unc79         |
| ENSMUSG00000043065  | -0,689 | 0,000 Spice1        |
| ENSMUSG00000042010  | -0,690 | 0,017 Acacb         |
| ENSMUSG00000049916  | -0,691 | 0,002 2610318N02Rik |
| ENSMUSG00000033420  | -0,691 | 0,002 Antxr1        |
| ENSMUSG00000020099  | -0,691 | 0,008 Unc5b         |
| ENSMUSG00000027075  | -0,695 | 0,000 Slc43a1       |
| ENSMUSG00000021176  | -0,695 | 0,000 Efcab11       |
| ENSMUSG00000026872  | -0,695 | 0,039 Zeb2          |
| ENSMUSG00000055148  | -0,696 | 0,012 Klf2          |
| ENSMUSG00000030102  | -0,696 | 0,037 Itpr1         |
| ENSMUSG000000114584 | -0,696 | 0,028 AC131687.1    |
| ENSMUSG00000050541  | -0,697 | 0,016 Adra1b        |
| ENSMUSG00000031262  | -0,697 | 0,000 Cenpi         |
| ENSMUSG00000040852  | -0,698 | 0,007 Plekhh2       |
| ENSMUSG00000041961  | -0,698 | 0,017 Znrf3         |
| ENSMUSG00000049303  | -0,698 | 0,042 Syt12         |
| ENSMUSG00000087403  | -0,699 | 0,001 Kantr         |
| ENSMUSG000000107476 | -0,699 | 0,001 Zfp862-ps     |
| ENSMUSG00000045273  | -0,699 | 0,001 Cenph         |
| ENSMUSG00000059401  | -0,701 | 0,020 Mamld1        |
| ENSMUSG00000097415  | -0,701 | 0,000 AU020206      |
| ENSMUSG00000026014  | -0,701 | 0,012 Raph1         |
| ENSMUSG00000020330  | -0,701 | 0,005 Hmnr          |
| ENSMUSG00000020642  | -0,702 | 0,006 Rnf144a       |
| ENSMUSG00000048445  | -0,702 | 0,000 Ccdc57        |
| ENSMUSG00000074212  | -0,702 | 0,001 Dnajb14       |
| ENSMUSG00000060548  | -0,702 | 0,000 Tnfrsf19      |
| ENSMUSG00000061186  | -0,703 | 0,045 Sfbmt2        |
| ENSMUSG000000115186 | -0,703 | 0,039 AC151836.1    |
| ENSMUSG00000027323  | -0,704 | 0,000 Rad51         |
| ENSMUSG00000027524  | -0,704 | 0,003 Edn3          |
| ENSMUSG00000021707  | -0,704 | 0,000 Dhfr          |
| ENSMUSG00000046808  | -0,704 | 0,000 Atp10d        |
| ENSMUSG00000037337  | -0,705 | 0,009 Map4k1        |
| ENSMUSG00000015314  | -0,705 | 0,013 Slamf6        |



|                     |        |                |
|---------------------|--------|----------------|
| ENSMUSG00000032179  | -0,706 | 0,024 Bmp5     |
| ENSMUSG00000021572  | -0,706 | 0,000 Cep72    |
| ENSMUSG00000070565  | -0,706 | 0,037 Rasal2   |
| ENSMUSG00000020897  | -0,706 | 0,000 Aurkb    |
| ENSMUSG00000024376  | -0,707 | 0,015 Epb41l4a |
| ENSMUSG000000062901 | -0,708 | 0,047 Khlh24   |
| ENSMUSG00000028017  | -0,709 | 0,015 Egf      |
| ENSMUSG0000002996   | -0,709 | 0,000 Hbp1     |
| ENSMUSG000000089853 | -0,710 | 0,037 Gm15853  |
| ENSMUSG00000074802  | -0,711 | 0,027 Gas2l3   |
| ENSMUSG00000019699  | -0,711 | 0,013 Akt3     |
| ENSMUSG00000059173  | -0,711 | 0,011 Pde1a    |
| ENSMUSG00000033981  | -0,712 | 0,043 Gria2    |
| ENSMUSG00000045954  | -0,712 | 0,001 Cavin2   |
| ENSMUSG00000015880  | -0,713 | 0,005 Ncapg    |
| ENSMUSG000000063796 | -0,713 | 0,014 Slc22a8  |
| ENSMUSG00000037533  | -0,713 | 0,017 Rapgef6  |
| ENSMUSG00000075592  | -0,713 | 0,001 Nynrin   |
| ENSMUSG00000037890  | -0,714 | 0,001 Wdr19    |
| ENSMUSG00000029438  | -0,714 | 0,000 Bcl7a    |
| ENSMUSG00000073434  | -0,714 | 0,000 Wdr90    |
| ENSMUSG00000027015  | -0,715 | 0,019 Cybrd1   |
| ENSMUSG000000107253 | -0,715 | 0,032 Gm43634  |
| ENSMUSG00000072837  | -0,715 | 0,000 Mir546   |
| ENSMUSG00000041431  | -0,716 | 0,001 Ccnb1    |
| ENSMUSG00000036928  | -0,718 | 0,012 Stag3    |
| ENSMUSG00000033253  | -0,718 | 0,000 Szt2     |
| ENSMUSG00000024793  | -0,719 | 0,042 Tnfrsf25 |
| ENSMUSG00000001228  | -0,719 | 0,000 Uhrf1    |
| ENSMUSG000000030346 | -0,720 | 0,000 Rad51ap1 |
| ENSMUSG00000009575  | -0,721 | 0,000 Cbx5     |
| ENSMUSG00000027661  | -0,722 | 0,023 Slc2a10  |
| ENSMUSG00000039774  | -0,722 | 0,013 Galnt12  |
| ENSMUSG00000025140  | -0,722 | 0,002 Pycr1    |
| ENSMUSG00000032113  | -0,722 | 0,000 Chek1    |
| ENSMUSG00000038070  | -0,723 | 0,000 Cntln    |
| ENSMUSG000000063804 | -0,723 | 0,000 Lin28b   |
| ENSMUSG000000050199 | -0,723 | 0,011 Lgr4     |
| ENSMUSG00000032009  | -0,725 | 0,008 Sesn3    |
| ENSMUSG00000017861  | -0,726 | 0,000 Mybl2    |
| ENSMUSG00000025815  | -0,726 | 0,026 Dhdkd1   |
| ENSMUSG00000051497  | -0,727 | 0,022 Kcnj16   |
| ENSMUSG00000041696  | -0,728 | 0,019 Rasl12   |
| ENSMUSG00000028587  | -0,728 | 0,004 Orc1     |
| ENSMUSG00000033906  | -0,729 | 0,013 Zdhhc15  |
| ENSMUSG00000005951  | -0,729 | 0,000 Shpk     |
| ENSMUSG00000001507  | -0,729 | 0,002 Itga3    |

|                     |        |                     |
|---------------------|--------|---------------------|
| ENSMUSG00000003779  | -0,731 | 0,001 Kif20a        |
| ENSMUSG000000035045 | -0,731 | 0,047 Zc3h12b       |
| ENSMUSG000000033170 | -0,732 | 0,001 Card10        |
| ENSMUSG000000028214 | -0,732 | 0,038 Gem           |
| ENSMUSG000000032717 | -0,733 | 0,034 Mdfi          |
| ENSMUSG000000029714 | -0,733 | 0,000 Gigyf1        |
| ENSMUSG000000036223 | -0,734 | 0,001 Ska1          |
| ENSMUSG000000024299 | -0,734 | 0,000 Adamts10      |
| ENSMUSG000000045328 | -0,734 | 0,005 Cenpe         |
| ENSMUSG000000039763 | -0,734 | 0,000 Dnajc28       |
| ENSMUSG000000040260 | -0,734 | 0,006 Daam2         |
| ENSMUSG000000025574 | -0,734 | 0,004 Tk1           |
| ENSMUSG000000052407 | -0,735 | 0,030 Ccdc171       |
| ENSMUSG000000027489 | -0,735 | 0,008 Necab3        |
| ENSMUSG000000038379 | -0,735 | 0,000 Ttk           |
| ENSMUSG000000028551 | -0,737 | 0,000 Cdkn2c        |
| ENSMUSG000000063415 | -0,738 | 0,031 Cyp26b1       |
| ENSMUSG000000030255 | -0,738 | 0,009 Sspn          |
| ENSMUSG000000072762 | -0,742 | 0,001 4930522L14Rik |
| ENSMUSG000000087396 | -0,742 | 0,001 4933407K13Rik |
| ENSMUSG000000047757 | -0,743 | 0,000 Fancb         |
| ENSMUSG000000024301 | -0,743 | 0,002 Kifc5b        |
| ENSMUSG000000076275 | -0,745 | 0,003 Mir675        |
| ENSMUSG000000051022 | -0,745 | 0,001 Hs3st1        |
| ENSMUSG000000026809 | -0,745 | 0,035 Spaca9        |
| ENSMUSG000000034883 | -0,746 | 0,044 Lrr1          |
| ENSMUSG000000033715 | -0,746 | 0,030 Akr1c14       |
| ENSMUSG000000042628 | -0,747 | 0,000 Zfyve1        |
| ENSMUSG000000024174 | -0,747 | 0,000 Pot1b         |
| ENSMUSG000000055737 | -0,747 | 0,000 Ghr           |
| ENSMUSG000000037020 | -0,747 | 0,000 Wdr62         |
| ENSMUSG000000016493 | -0,748 | 0,046 Cd46          |
| ENSMUSG000000040055 | -0,748 | 0,012 Gjb6          |
| ENSMUSG000000036862 | -0,749 | 0,007 Dchs1         |
| ENSMUSG000000097337 | -0,749 | 0,034 Gm26606       |
| ENSMUSG000000045231 | -0,750 | 0,010 BC106179      |
| ENSMUSG000000005043 | -0,750 | 0,000 Sgsh          |
| ENSMUSG000000094595 | -0,750 | 0,000 Fsbp          |
| ENSMUSG000000044702 | -0,750 | 0,000 Palb2         |
| ENSMUSG000000047888 | -0,751 | 0,010 Tnrc6b        |
| ENSMUSG000000068744 | -0,752 | 0,004 Psrc1         |
| ENSMUSG000000052105 | -0,753 | 0,045 Mtcl1         |
| ENSMUSG00000006715  | -0,753 | 0,001 Gmnn          |
| ENSMUSG000000039187 | -0,753 | 0,000 Fanci         |
| ENSMUSG000000037474 | -0,754 | 0,000 Dtl           |
| ENSMUSG000000026622 | -0,754 | 0,005 Nek2          |
| ENSMUSG000000097243 | -0,754 | 0,045 Gm26908       |

|                      |        |                     |
|----------------------|--------|---------------------|
| ENSMUSG00000021767   | -0,755 | 0,011 Kat6b         |
| ENSMUSG00000019845   | -0,755 | 0,000 Tube1         |
| ENSMUSG000000066440  | -0,756 | 0,003 Zfyve26       |
| ENSMUSG00000026812   | -0,756 | 0,000 Tsc1          |
| ENSMUSG000000039963  | -0,756 | 0,005 Ccdc40        |
| ENSMUSG000000028024  | -0,756 | 0,015 Enpep         |
| ENSMUSG000000023066  | -0,756 | 0,012 Rttm          |
| ENSMUSG000000034684  | -0,757 | 0,006 Sema3f        |
| ENSMUSG000000072980  | -0,757 | 0,000 Oip5          |
| ENSMUSG000000000056  | -0,757 | 0,000 Narf          |
| ENSMUSG000000022893  | -0,757 | 0,004 Adamts1       |
| ENSMUSG000000021662  | -0,757 | 0,003 Arhgef28      |
| ENSMUSG000000060176  | -0,757 | 0,037 Kif27         |
| ENSMUSG000000032558  | -0,757 | 0,000 Nphp3         |
| ENSMUSG000000025555  | -0,758 | 0,000 Farp1         |
| ENSMUSG000000024901  | -0,758 | 0,000 Peli3         |
| ENSMUSG000000028803  | -0,759 | 0,000 Nipal3        |
| ENSMUSG000000110652  | -0,759 | 0,039 Gm33023       |
| ENSMUSG000000000142  | -0,760 | 0,001 Axin2         |
| ENSMUSG000000023034  | -0,760 | 0,042 Nr4a1         |
| ENSMUSG000000026674  | -0,761 | 0,003 Ddr2          |
| ENSMUSG000000019763  | -0,761 | 0,000 Rmnd1         |
| ENSMUSG0000000041147 | -0,761 | 0,000 Brca2         |
| ENSMUSG000000027843  | -0,762 | 0,004 Ptpn22        |
| ENSMUSG000000024713  | -0,763 | 0,002 Pcsk5         |
| ENSMUSG000000097536  | -0,763 | 0,043 2610037D02Rik |
| ENSMUSG000000026255  | -0,763 | 0,023 Efh1          |
| ENSMUSG000000048001  | -0,763 | 0,047 Hes5          |
| ENSMUSG000000030494  | -0,763 | 0,010 Rhpn2         |
| ENSMUSG000000019773  | -0,764 | 0,000 Fbxo5         |
| ENSMUSG000000090626  | -0,764 | 0,000 Tex9          |
| ENSMUSG000000103400  | -0,764 | 0,000 Gm15853       |
| ENSMUSG000000019214  | -0,764 | 0,000 Chtf18        |
| ENSMUSG000000044783  | -0,765 | 0,000 Hjurp         |
| ENSMUSG000000036867  | -0,765 | 0,000 Smad6         |
| ENSMUSG000000040276  | -0,765 | 0,000 Pacsin1       |
| ENSMUSG000000025395  | -0,765 | 0,000 Prim1         |
| ENSMUSG000000032238  | -0,766 | 0,004 Rora          |
| ENSMUSG000000024598  | -0,766 | 0,030 Fbn2          |
| ENSMUSG000000022475  | -0,766 | 0,000 Hdac7         |
| ENSMUSG000000037336  | -0,766 | 0,037 Mfsd2b        |
| ENSMUSG000000099032  | -0,766 | 0,050 Tcf24         |
| ENSMUSG000000029414  | -0,767 | 0,001 Kntc1         |
| ENSMUSG000000047534  | -0,767 | 0,001 Mis18bp1      |
| ENSMUSG000000005774  | -0,767 | 0,000 Rfx5          |
| ENSMUSG000000079685  | -0,768 | 0,004 Ulbp1         |
| ENSMUSG000000039748  | -0,768 | 0,000 Exo1          |

|                     |        |                      |
|---------------------|--------|----------------------|
| ENSMUSG00000020098  | -0,768 | 0,005 Pcbd1          |
| ENSMUSG00000069892  | -0,769 | 0,032 9930111J21Rik2 |
| ENSMUSG00000050751  | -0,769 | 0,009 Pgbd5          |
| ENSMUSG00000054134  | -0,769 | 0,029 Umodl1         |
| ENSMUSG00000067860  | -0,769 | 0,004 Zic3           |
| ENSMUSG00000071324  | -0,770 | 0,000 Armc2          |
| ENSMUSG00000033705  | -0,771 | 0,010 Stard9         |
| ENSMUSG00000034903  | -0,771 | 0,017 Cobll1         |
| ENSMUSG00000000037  | -0,772 | 0,007 Scml2          |
| ENSMUSG00000023940  | -0,772 | 0,000 Sgo1           |
| ENSMUSG00000020883  | -0,772 | 0,000 Fbxl20         |
| ENSMUSG00000000028  | -0,772 | 0,000 Cdc45          |
| ENSMUSG00000002076  | -0,773 | 0,024 Hsf2bp         |
| ENSMUSG00000035365  | -0,773 | 0,007 Parpbp         |
| ENSMUSG00000025776  | -0,773 | 0,028 Crispld1       |
| ENSMUSG00000014164  | -0,773 | 0,000 Klhl3          |
| ENSMUSG00000110393  | -0,774 | 0,010 Gm36445        |
| ENSMUSG00000041957  | -0,774 | 0,030 Pkp2           |
| ENSMUSG00000046280  | -0,775 | 0,011 She            |
| ENSMUSG00000056214  | -0,775 | 0,000 Pard6g         |
| ENSMUSG00000031355  | -0,775 | 0,030 Arhgap6        |
| ENSMUSG00000021690  | -0,775 | 0,006 Jmy            |
| ENSMUSG00000020105  | -0,775 | 0,000 Lrig3          |
| ENSMUSG00000049134  | -0,776 | 0,006 Nrap           |
| ENSMUSG00000025154  | -0,777 | 0,000 Arhgap19       |
| ENSMUSG00000041064  | -0,777 | 0,000 Pif1           |
| ENSMUSG00000004099  | -0,778 | 0,000 Dnmt1          |
| ENSMUSG00000042097  | -0,779 | 0,005 Zfp239         |
| ENSMUSG00000032633  | -0,779 | 0,000 Flcn           |
| ENSMUSG000000021180 | -0,779 | 0,000 Rps6ka5        |
| ENSMUSG00000032925  | -0,781 | 0,022 Itgbl1         |
| ENSMUSG00000020042  | -0,781 | 0,028 Btdb11         |
| ENSMUSG00000089809  | -0,781 | 0,005 Rasgef1b       |
| ENSMUSG00000040631  | -0,782 | 0,001 Dok4           |
| ENSMUSG00000002032  | -0,782 | 0,002 Tmem25         |
| ENSMUSG00000072082  | -0,783 | 0,000 Ccnf           |
| ENSMUSG00000048939  | -0,783 | 0,044 Atp13a5        |
| ENSMUSG00000032400  | -0,783 | 0,000 Zwilch         |
| ENSMUSG00000025993  | -0,784 | 0,018 Slc40a1        |
| ENSMUSG00000001864  | -0,784 | 0,000 Aif1l          |
| ENSMUSG00000030606  | -0,785 | 0,000 Hapln3         |
| ENSMUSG00000090115  | -0,785 | 0,000 Usp49          |
| ENSMUSG00000012443  | -0,785 | 0,002 Kif11          |
| ENSMUSG00000034601  | -0,786 | 0,000 2700049A03Rik  |
| ENSMUSG00000030237  | -0,787 | 0,002 Slco1a4        |
| ENSMUSG00000074024  | -0,788 | 0,008 4632427E13Rik  |
| ENSMUSG00000021573  | -0,789 | 0,001 Tppp           |

|                     |        |                     |
|---------------------|--------|---------------------|
| ENSMUSG00000020774  | -0,790 | 0,000 Aspa          |
| ENSMUSG00000040147  | -0,792 | 0,004 Maob          |
| ENSMUSG00000049265  | -0,792 | 0,048 Kcnk3         |
| ENSMUSG00000097177  | -0,792 | 0,039 9330159M07Rik |
| ENSMUSG00000074194  | -0,793 | 0,002 Zfp791        |
| ENSMUSG00000030499  | -0,797 | 0,000 Kctd15        |
| ENSMUSG00000030134  | -0,797 | 0,011 Rasgef1a      |
| ENSMUSG00000049488  | -0,797 | 0,000 Tmem67        |
| ENSMUSG00000044362  | -0,797 | 0,018 Ccdc89        |
| ENSMUSG00000029641  | -0,798 | 0,022 Rasi11a       |
| ENSMUSG00000001517  | -0,799 | 0,000 Foxm1         |
| ENSMUSG00000030865  | -0,800 | 0,013 Chp2          |
| ENSMUSG000000114980 | -0,802 | 0,048 AC102815.1    |
| ENSMUSG00000074415  | -0,803 | 0,035 2610203C20Rik |
| ENSMUSG00000041930  | -0,803 | 0,000 Fam222a       |
| ENSMUSG000000020493 | -0,806 | 0,008 Prr11         |
| ENSMUSG00000039765  | -0,807 | 0,000 Cc2d2a        |
| ENSMUSG00000021294  | -0,808 | 0,002 Kif26a        |
| ENSMUSG000000109179 | -0,808 | 0,011 Gm35339       |
| ENSMUSG000000034329 | -0,808 | 0,003 Brip1         |
| ENSMUSG00000022206  | -0,808 | 0,021 Npr3          |
| ENSMUSG000000108368 | -0,809 | 0,026 Gm45053       |
| ENSMUSG000000031196 | -0,809 | 0,007 F8            |
| ENSMUSG00000047867  | -0,810 | 0,001 Gimap6        |
| ENSMUSG00000034911  | -0,811 | 0,031 Ushbp1        |
| ENSMUSG00000052302  | -0,811 | 0,001 Tbc1d30       |
| ENSMUSG00000040287  | -0,811 | 0,027 Stac3         |
| ENSMUSG00000038119  | -0,812 | 0,010 Cdon          |
| ENSMUSG00000022833  | -0,812 | 0,000 Ccdc14        |
| ENSMUSG000000051378 | -0,812 | 0,000 Kif18b        |
| ENSMUSG00000051220  | -0,813 | 0,000 Ercc6l        |
| ENSMUSG00000036777  | -0,814 | 0,003 Anln          |
| ENSMUSG00000026358  | -0,814 | 0,050 Rgs1          |
| ENSMUSG00000026768  | -0,815 | 0,014 Itga8         |
| ENSMUSG00000049580  | -0,815 | 0,000 Tsku          |
| ENSMUSG00000073437  | -0,815 | 0,000 D330041H03Rik |
| ENSMUSG000000057137 | -0,816 | 0,000 Tmem140       |
| ENSMUSG00000042029  | -0,816 | 0,016 Ncapg2        |
| ENSMUSG00000045092  | -0,816 | 0,000 S1pr1         |
| ENSMUSG00000027635  | -0,817 | 0,000 Dsn1          |
| ENSMUSG000000038331 | -0,817 | 0,030 Satb2         |
| ENSMUSG00000091586  | -0,817 | 0,002 Cyp4f17       |
| ENSMUSG00000037544  | -0,819 | 0,000 Dlgap5        |
| ENSMUSG000000000416 | -0,820 | 0,020 Cttnbp2       |
| ENSMUSG00000063450  | -0,820 | 0,023 Syne2         |
| ENSMUSG00000027379  | -0,821 | 0,000 Bub1          |
| ENSMUSG00000087231  | -0,821 | 0,003 E230016M11Rik |



|                      |        |                     |
|----------------------|--------|---------------------|
| ENSMUSG00000041688   | -0,821 | 0,006 Amot          |
| ENSMUSG000000097519  | -0,821 | 0,042 4930558J18Rik |
| ENSMUSG000000048728  | -0,822 | 0,014 Zfp454        |
| ENSMUSG000000091661  | -0,823 | 0,002 Gm17021       |
| ENSMUSG000000021965  | -0,824 | 0,000 Ska3          |
| ENSMUSG000000028278  | -0,825 | 0,000 Rragd         |
| ENSMUSG000000028555  | -0,825 | 0,039 Ttc39a        |
| ENSMUSG000000030254  | -0,825 | 0,000 Rad18         |
| ENSMUSG0000000061414 | -0,826 | 0,001 Cracr2a       |
| ENSMUSG000000031847  | -0,829 | 0,001 1700030J22Rik |
| ENSMUSG000000026648  | -0,830 | 0,000 Dclre1c       |
| ENSMUSG000000046470  | -0,830 | 0,030 Sox18         |
| ENSMUSG000000006386  | -0,830 | 0,021 Tek           |
| ENSMUSG000000048922  | -0,830 | 0,001 Cdca2         |
| ENSMUSG000000038732  | -0,830 | 0,000 Mboat1        |
| ENSMUSG0000000048924 | -0,831 | 0,000 Ccdc125       |
| ENSMUSG000000029913  | -0,831 | 0,000 Prdm5         |
| ENSMUSG000000026605  | -0,834 | 0,003 Cenpf         |
| ENSMUSG000000030020  | -0,835 | 0,023 Prickle2      |
| ENSMUSG000000078937  | -0,836 | 0,000 Cpt1b         |
| ENSMUSG000000048402  | -0,837 | 0,021 Gli2          |
| ENSMUSG000000030559  | -0,838 | 0,021 Rab38         |
| ENSMUSG0000000042961 | -0,838 | 0,000 Egflam        |
| ENSMUSG000000098090  | -0,840 | 0,009 2700099C18Rik |
| ENSMUSG000000075225  | -0,840 | 0,013 Ccdc162       |
| ENSMUSG000000024727  | -0,840 | 0,007 Trpm6         |
| ENSMUSG000000103260  | -0,841 | 0,016 Gm8146        |
| ENSMUSG000000027699  | -0,841 | 0,009 Ect2          |
| ENSMUSG000000039620  | -0,847 | 0,023 6430573F11Rik |
| ENSMUSG0000000084896 | -0,850 | 0,013 Gm11632       |
| ENSMUSG000000032783  | -0,851 | 0,000 Troap         |
| ENSMUSG00000002997   | -0,851 | 0,000 Prkar2b       |
| ENSMUSG000000030650  | -0,853 | 0,039 Tmc5          |
| ENSMUSG000000039741  | -0,854 | 0,003 Bahcc1        |
| ENSMUSG000000028702  | -0,854 | 0,000 Rad54l        |
| ENSMUSG000000027115  | -0,855 | 0,000 Kif18a        |
| ENSMUSG0000000024795 | -0,855 | 0,001 Kif20b        |
| ENSMUSG000000023033  | -0,856 | 0,042 Scn8a         |
| ENSMUSG000000022332  | -0,856 | 0,000 Khdrbs3       |
| ENSMUSG000000034023  | -0,857 | 0,000 Fancd2        |
| ENSMUSG000000071855  | -0,858 | 0,000 Ccdc112       |
| ENSMUSG000000060402  | -0,859 | 0,017 Chst8         |
| ENSMUSG000000021575  | -0,862 | 0,000 Ahrr          |
| ENSMUSG000000030528  | -0,862 | 0,000 Blm           |
| ENSMUSG000000010175  | -0,863 | 0,002 Prox1         |
| ENSMUSG000000042429  | -0,863 | 0,016 Adora1        |
| ENSMUSG000000072915  | -0,864 | 0,000 Gm12258       |

|                     |        |                     |
|---------------------|--------|---------------------|
| ENSMUSG00000055240  | -0,864 | 0,000 Zfp101        |
| ENSMUSG00000060275  | -0,864 | 0,023 Nrg2          |
| ENSMUSG00000027242  | -0,864 | 0,000 Wdr76         |
| ENSMUSG00000032855  | -0,865 | 0,004 Pkd1          |
| ENSMUSG00000021611  | -0,866 | 0,006 Tert          |
| ENSMUSG00000016028  | -0,866 | 0,024 Celsr1        |
| ENSMUSG00000022604  | -0,867 | 0,000 Cep97         |
| ENSMUSG00000042988  | -0,870 | 0,001 Notum         |
| ENSMUSG000000051043 | -0,871 | 0,000 Gprc5c        |
| ENSMUSG000000090958 | -0,872 | 0,002 Lrrc32        |
| ENSMUSG00000039814  | -0,874 | 0,001 Xkr5          |
| ENSMUSG00000026039  | -0,874 | 0,000 Sgo2a         |
| ENSMUSG00000039055  | -0,876 | 0,000 Eme1          |
| ENSMUSG00000078502  | -0,876 | 0,016 Gm13212       |
| ENSMUSG00000051367  | -0,877 | 0,044 Six1          |
| ENSMUSG000000048249 | -0,877 | 0,000 Crebrf        |
| ENSMUSG00000035024  | -0,878 | 0,000 Ncapd3        |
| ENSMUSG00000086782  | -0,878 | 0,043 E130102H24Rik |
| ENSMUSG00000043639  | -0,878 | 0,029 Rbm20         |
| ENSMUSG00000047473  | -0,879 | 0,000 Zfp30         |
| ENSMUSG00000027875  | -0,879 | 0,000 Hmgcs2        |
| ENSMUSG00000034610  | -0,879 | 0,000 Zcchc11       |
| ENSMUSG000000042851 | -0,879 | 0,008 Zc3h6         |
| ENSMUSG00000048387  | -0,880 | 0,029 Osr1          |
| ENSMUSG00000089837  | -0,880 | 0,011 Npcd          |
| ENSMUSG00000086962  | -0,880 | 0,007 Gm12248       |
| ENSMUSG00000029406  | -0,880 | 0,000 Pitpnm2       |
| ENSMUSG00000032815  | -0,881 | 0,000 Fanca         |
| ENSMUSG00000046352  | -0,883 | 0,000 Gjb2          |
| ENSMUSG00000015659  | -0,884 | 0,003 Serac1        |
| ENSMUSG00000056531  | -0,885 | 0,001 Ccdc18        |
| ENSMUSG00000033149  | -0,885 | 0,001 Phldb2        |
| ENSMUSG00000028978  | -0,885 | 0,006 Nos3          |
| ENSMUSG00000028804  | -0,886 | 0,039 Csmc2         |
| ENSMUSG00000113184  | -0,886 | 0,006 AC125351.1    |
| ENSMUSG00000020758  | -0,887 | 0,002 Itgb4         |
| ENSMUSG000000045930 | -0,888 | 0,000 Clec14a       |
| ENSMUSG00000040133  | -0,890 | 0,031 Gpr176        |
| ENSMUSG00000047747  | -0,890 | 0,000 Rnf150        |
| ENSMUSG00000074220  | -0,890 | 0,037 Zfp382        |
| ENSMUSG00000030091  | -0,890 | 0,000 Nup210        |
| ENSMUSG00000037568  | -0,892 | 0,000 Vash2         |
| ENSMUSG00000041695  | -0,893 | 0,007 Kcnj2         |
| ENSMUSG000000021186 | -0,893 | 0,000 Fbln5         |
| ENSMUSG00000084989  | -0,894 | 0,012 Crocc2        |
| ENSMUSG00000080463  | -0,895 | 0,031 Gm22489       |
| ENSMUSG00000027074  | -0,895 | 0,000 Slc43a3       |

|                     |        |                     |
|---------------------|--------|---------------------|
| ENSMUSG00000021287  | -0,895 | 0,000 Xrcc3         |
| ENSMUSG000000098183 | -0,895 | 0,038 Gm27010       |
| ENSMUSG000000038068 | -0,895 | 0,000 Rnf144b       |
| ENSMUSG000000074793 | -0,896 | 0,000 Hspa12b       |
| ENSMUSG000000021714 | -0,897 | 0,001 Cenpk         |
| ENSMUSG000000049119 | -0,897 | 0,000 Fam110b       |
| ENSMUSG000000041836 | -0,897 | 0,000 Ptpre         |
| ENSMUSG000000069910 | -0,898 | 0,000 Spdl1         |
| ENSMUSG000000026196 | -0,900 | 0,001 Bard1         |
| ENSMUSG000000024056 | -0,901 | 0,000 Ndc80         |
| ENSMUSG000000044667 | -0,902 | 0,037 Plppr4        |
| ENSMUSG000000094942 | -0,903 | 0,018 Gm3604        |
| ENSMUSG000000032254 | -0,904 | 0,000 Kif23         |
| ENSMUSG000000051606 | -0,904 | 0,004 2010001K21Rik |
| ENSMUSG000000038151 | -0,908 | 0,002 Prdm1         |
| ENSMUSG000000027977 | -0,908 | 0,016 Ndst3         |
| ENSMUSG000000020593 | -0,909 | 0,000 Lpin1         |
| ENSMUSG000000019027 | -0,909 | 0,020 Dnah1         |
| ENSMUSG000000057604 | -0,911 | 0,000 Lmcd1         |
| ENSMUSG000000036186 | -0,912 | 0,001 Fam69b        |
| ENSMUSG000000085133 | -0,913 | 0,000 B930095G15Rik |
| ENSMUSG000000045287 | -0,913 | 0,000 Rtn4rl1       |
| ENSMUSG000000018604 | -0,914 | 0,005 Tbx3          |
| ENSMUSG000000039981 | -0,914 | 0,042 Zc3h12d       |
| ENSMUSG000000020256 | -0,914 | 0,006 Aldh1l2       |
| ENSMUSG000000041633 | -0,914 | 0,000 Kctd12b       |
| ENSMUSG000000029070 | -0,915 | 0,001 Mxra8         |
| ENSMUSG000000047146 | -0,916 | 0,014 Tet1          |
| ENSMUSG000000114995 | -0,916 | 0,018 AC137842.1    |
| ENSMUSG000000064493 | -0,917 | 0,024 Snora28       |
| ENSMUSG000000053411 | -0,918 | 0,000 Cbx7          |
| ENSMUSG000000024647 | -0,918 | 0,029 Cbln2         |
| ENSMUSG000000073414 | -0,918 | 0,035 Mpig6b        |
| ENSMUSG000000036768 | -0,920 | 0,000 Kif15         |
| ENSMUSG000000067430 | -0,923 | 0,001 Zfp763        |
| ENSMUSG000000033453 | -0,927 | 0,003 Adamts15      |
| ENSMUSG000000058740 | -0,930 | 0,021 Kcnt1         |
| ENSMUSG000000020275 | -0,930 | 0,000 Rel           |
| ENSMUSG000000036875 | -0,930 | 0,000 Dna2          |
| ENSMUSG000000040310 | -0,933 | 0,008 Alx4          |
| ENSMUSG000000019982 | -0,934 | 0,000 Myb           |
| ENSMUSG000000020381 | -0,934 | 0,000 Mrnip         |
| ENSMUSG000000039385 | -0,936 | 0,000 Cdh6          |
| ENSMUSG000000078866 | -0,938 | 0,018 Zfp970        |
| ENSMUSG000000002409 | -0,938 | 0,000 Dyrk1b        |
| ENSMUSG000000029516 | -0,939 | 0,001 Cit           |
| ENSMUSG000000090665 | -0,940 | 0,023 Gad1-ps       |

|                     |        |                |
|---------------------|--------|----------------|
| ENSMUSG00000038305  | -0,940 | 0,000 Spats2l  |
| ENSMUSG00000035246  | -0,941 | 0,000 Pcyt1b   |
| ENSMUSG00000044303  | -0,941 | 0,017 Cdkn2a   |
| ENSMUSG00000040543  | -0,942 | 0,006 Pitpnm3  |
| ENSMUSG00000071723  | -0,942 | 0,000 Gspt2    |
| ENSMUSG00000026628  | -0,944 | 0,006 Atf3     |
| ENSMUSG00000042564  | -0,946 | 0,002 Fam227a  |
| ENSMUSG00000049001  | -0,946 | 0,000 Ndnf     |
| ENSMUSG00000034586  | -0,949 | 0,000 Hid1     |
| ENSMUSG00000041757  | -0,950 | 0,000 Plekha6  |
| ENSMUSG00000034206  | -0,952 | 0,000 Polq     |
| ENSMUSG00000071176  | -0,953 | 0,000 Arhgef10 |
| ENSMUSG000000098986 | -0,954 | 0,025 Gm28006  |
| ENSMUSG000000097750 | -0,954 | 0,002 Gm4673   |
| ENSMUSG00000027792  | -0,955 | 0,001 Bche     |
| ENSMUSG000000088219 | -0,957 | 0,010 Gm22077  |
| ENSMUSG00000011263  | -0,957 | 0,007 Exoc3l2  |
| ENSMUSG00000021986  | -0,960 | 0,009 Amer2    |
| ENSMUSG00000052921  | -0,961 | 0,000 Arhgef15 |
| ENSMUSG000000055884 | -0,961 | 0,000 Fancm    |
| ENSMUSG00000030616  | -0,963 | 0,008 Sytl2    |
| ENSMUSG00000039396  | -0,963 | 0,000 Neil3    |
| ENSMUSG00000002055  | -0,965 | 0,000 Spag5    |
| ENSMUSG00000030757  | -0,965 | 0,000 Zkscan2  |
| ENSMUSG00000048096  | -0,965 | 0,024 Lmod1    |
| ENSMUSG00000026589  | -0,966 | 0,008 Sec16b   |
| ENSMUSG000000052852 | -0,966 | 0,000 Reep1    |
| ENSMUSG00000050390  | -0,968 | 0,000 C77080   |
| ENSMUSG00000022358  | -0,971 | 0,000 Fbxo32   |
| ENSMUSG000000025504 | -0,971 | 0,018 Eps8l2   |
| ENSMUSG000000086266 | -0,973 | 0,026 Igf2os   |
| ENSMUSG00000031004  | -0,974 | 0,000 Mki67    |
| ENSMUSG00000000392  | -0,975 | 0,001 Fap      |
| ENSMUSG000000066191 | -0,976 | 0,000 Anks6    |
| ENSMUSG00000033952  | -0,977 | 0,011 Aspm     |
| ENSMUSG00000039994  | -0,978 | 0,000 Timeless |
| ENSMUSG000000027654 | -0,980 | 0,000 Fam83d   |
| ENSMUSG00000020185  | -0,981 | 0,001 E2f7     |
| ENSMUSG00000035413  | -0,982 | 0,000 Tmem98   |
| ENSMUSG00000026779  | -0,982 | 0,000 Mastl    |
| ENSMUSG000000063810 | -0,983 | 0,008 Alms1    |
| ENSMUSG00000017146  | -0,983 | 0,000 Brca1    |
| ENSMUSG00000029512  | -0,987 | 0,000 Ulk1     |
| ENSMUSG000000052353 | -0,988 | 0,009 Cemip    |
| ENSMUSG00000028525  | -0,989 | 0,000 Pde4b    |
| ENSMUSG00000071341  | -0,989 | 0,050 Egr4     |
| ENSMUSG00000074867  | -0,992 | 0,009 Zfp808   |

|                      |        |                 |
|----------------------|--------|-----------------|
| ENSMUSG00000020151   | -0,993 | 0,034 Ptprr     |
| ENSMUSG000000055333  | -0,994 | 0,036 Fat2      |
| ENSMUSG000000027386  | -0,996 | 0,002 Fbln7     |
| ENSMUSG000000028718  | -0,997 | 0,000 Stil      |
| ENSMUSG000000030283  | -0,999 | 0,012 St8sia1   |
| ENSMUSG000000049985  | -0,999 | 0,018 Ankrd55   |
| ENSMUSG00000002578   | -0,999 | 0,013 Ikzf4     |
| ENSMUSG000000020905  | -1,000 | 0,013 Usp43     |
| ENSMUSG000000029283  | -1,003 | 0,000 Cdc7      |
| ENSMUSG000000108095  | -1,003 | 0,020 Gm44067   |
| ENSMUSG000000039908  | -1,006 | 0,000 Slc26a11  |
| ENSMUSG000000026274  | -1,011 | 0,000 Pask      |
| ENSMUSG000000036295  | -1,011 | 0,000 Lrrn3     |
| ENSMUSG000000016624  | -1,012 | 0,000 Phf21b    |
| ENSMUSG000000025270  | -1,014 | 0,048 Alas2     |
| ENSMUSG000000064043  | -1,014 | 0,000 Trerf1    |
| ENSMUSG000000022360  | -1,014 | 0,000 Atad2     |
| ENSMUSG000000000782  | -1,015 | 0,000 Tcf7      |
| ENSMUSG000000105368  | -1,015 | 0,006 Gm43759   |
| ENSMUSG000000022766  | -1,015 | 0,010 Serpind1  |
| ENSMUSG000000058385  | -1,018 | 0,003 Hist1h2bg |
| ENSMUSG000000019789  | -1,020 | 0,000 Hey2      |
| ENSMUSG000000024420  | -1,021 | 0,001 Zfp521    |
| ENSMUSG000000030123  | -1,023 | 0,001 Plxnd1    |
| ENSMUSG000000033083  | -1,024 | 0,000 Tbc1d4    |
| ENSMUSG000000026669  | -1,026 | 0,000 Mcm10     |
| ENSMUSG000000053040  | -1,028 | 0,000 Aph1c     |
| ENSMUSG000000047875  | -1,028 | 0,001 Gpr157    |
| ENSMUSG000000022723  | -1,029 | 0,000 Crybg3    |
| ENSMUSG0000000101122 | -1,032 | 0,035 Gm17971   |
| ENSMUSG000000032419  | -1,032 | 0,000 Tbx18     |
| ENSMUSG000000043456  | -1,034 | 0,021 Zfp536    |
| ENSMUSG000000020182  | -1,034 | 0,018 Ddc       |
| ENSMUSG000000054580  | -1,035 | 0,003 Pla2r1    |
| ENSMUSG000000031486  | -1,036 | 0,000 Adgra2    |
| ENSMUSG000000028438  | -1,036 | 0,001 Kif24     |
| ENSMUSG0000000085912 | -1,038 | 0,002 Trp53cor1 |
| ENSMUSG000000043020  | -1,038 | 0,008 Wdr63     |
| ENSMUSG000000047793  | -1,040 | 0,000 Sned1     |
| ENSMUSG000000027326  | -1,041 | 0,006 Knl1      |
| ENSMUSG000000017400  | -1,043 | 0,021 Stac2     |
| ENSMUSG000000108137  | -1,043 | 0,036 Gm44053   |
| ENSMUSG000000035509  | -1,046 | 0,002 Fbxl21    |
| ENSMUSG0000000031629 | -1,051 | 0,000 Cenpu     |
| ENSMUSG000000003949  | -1,053 | 0,000 Hlf       |
| ENSMUSG000000030699  | -1,060 | 0,009 Tbx6      |
| ENSMUSG000000006958  | -1,060 | 0,001 Chrd      |



|                     |        |                  |
|---------------------|--------|------------------|
| ENSMUSG00000078773  | -1,061 | 0,000 Rad54b     |
| ENSMUSG00000009418  | -1,061 | 0,000 Nav1       |
| ENSMUSG00000073910  | -1,061 | 0,001 Mob3b      |
| ENSMUSG00000017550  | -1,062 | 0,000 Atad5      |
| ENSMUSG00000038319  | -1,064 | 0,000 Kcnh2      |
| ENSMUSG00000040111  | -1,065 | 0,000 Gramd1b    |
| ENSMUSG00000095123  | -1,070 | 0,012 Gm21781    |
| ENSMUSG00000102953  | -1,072 | 0,049 Gm37019    |
| ENSMUSG00000019989  | -1,074 | 0,022 Enpp3      |
| ENSMUSG00000026888  | -1,074 | 0,000 Grb14      |
| ENSMUSG00000102302  | -1,075 | 0,016 Gm38190    |
| ENSMUSG00000080741  | -1,076 | 0,044 Gm11398    |
| ENSMUSG00000103046  | -1,079 | 0,023 Gm37309    |
| ENSMUSG00000044037  | -1,080 | 0,000 Als2cl     |
| ENSMUSG00000112008  | -1,080 | 0,020 AC124556.1 |
| ENSMUSG000000024274 | -1,080 | 0,043 Zscan30    |
| ENSMUSG00000064065  | -1,080 | 0,018 Ipcef1     |
| ENSMUSG00000018126  | -1,082 | 0,028 Baiap2l2   |
| ENSMUSG00000025927  | -1,083 | 0,017 Tfap2b     |
| ENSMUSG00000022034  | -1,083 | 0,000 Esco2      |
| ENSMUSG00000042500  | -1,089 | 0,000 Ago4       |
| ENSMUSG00000000126  | -1,093 | 0,004 Wnt9a      |
| ENSMUSG000000059479 | -1,094 | 0,000 B3gnt8     |
| ENSMUSG00000031258  | -1,095 | 0,007 Xkrx       |
| ENSMUSG00000087142  | -1,097 | 0,012 Gm12454    |
| ENSMUSG00000025916  | -1,098 | 0,035 Ppp1r42    |
| ENSMUSG00000108024  | -1,098 | 0,028 Gm43912    |
| ENSMUSG00000033207  | -1,099 | 0,000 Mamdc2     |
| ENSMUSG00000089542  | -1,100 | 0,005 Gm25835    |
| ENSMUSG000000069743 | -1,101 | 0,000 Zfp820     |
| ENSMUSG00000039783  | -1,101 | 0,020 Kmo        |
| ENSMUSG00000030353  | -1,103 | 0,021 Tead4      |
| ENSMUSG00000046818  | -1,103 | 0,001 Ddit4l     |
| ENSMUSG00000046591  | -1,105 | 0,000 Ticrr      |
| ENSMUSG00000033730  | -1,107 | 0,021 Egr3       |
| ENSMUSG00000061175  | -1,108 | 0,001 Fnip2      |
| ENSMUSG000000052415 | -1,109 | 0,011 Tchh       |
| ENSMUSG00000021803  | -1,110 | 0,017 Cdhr1      |
| ENSMUSG00000033060  | -1,111 | 0,001 Lmo7       |
| ENSMUSG00000058396  | -1,114 | 0,003 Gpr182     |
| ENSMUSG000000086741 | -1,119 | 0,009 Gm15816    |
| ENSMUSG00000016756  | -1,120 | 0,000 Cmah       |
| ENSMUSG00000051278  | -1,126 | 0,000 Zgrf1      |
| ENSMUSG000000037892 | -1,126 | 0,000 Pcdh18     |
| ENSMUSG00000037661  | -1,126 | 0,012 Gpr160     |
| ENSMUSG00000006362  | -1,128 | 0,000 Cbfa2t3    |
| ENSMUSG00000025577  | -1,128 | 0,000 Cbx2       |

|                    |        |                     |
|--------------------|--------|---------------------|
| ENSMUSG00000031558 | -1,129 | 0,002 Slit2         |
| ENSMUSG00000025932 | -1,131 | 0,000 Eya1          |
| ENSMUSG00000111535 | -1,133 | 0,019 Gm35154       |
| ENSMUSG00000032394 | -1,136 | 0,001 Igdcc3        |
| ENSMUSG00000103928 | -1,137 | 0,010 Gm37893       |
| ENSMUSG00000093452 | -1,141 | 0,018 Zfhx2os       |
| ENSMUSG00000100826 | -1,141 | 0,045 Snhg14        |
| ENSMUSG00000104965 | -1,142 | 0,038 Gm43437       |
| ENSMUSG00000028457 | -1,142 | 0,011 Atp8b5        |
| ENSMUSG00000078700 | -1,142 | 0,005 D030028A08Rik |
| ENSMUSG00000025912 | -1,144 | 0,003 Mybl1         |
| ENSMUSG00000092341 | -1,150 | 0,000 Malat1        |
| ENSMUSG00000026870 | -1,152 | 0,023 Cutal         |
| ENSMUSG00000032503 | -1,153 | 0,000 Arpp21        |
| ENSMUSG00000041703 | -1,154 | 0,005 Zic5          |
| ENSMUSG00000046618 | -1,156 | 0,000 Olfml2a       |
| ENSMUSG00000031661 | -1,157 | 0,000 Nkd1          |
| ENSMUSG00000045875 | -1,161 | 0,038 Adra1a        |
| ENSMUSG00000098462 | -1,164 | 0,002 Gm27694       |
| ENSMUSG00000112808 | -1,164 | 0,022 Gm4739        |
| ENSMUSG00000086008 | -1,166 | 0,026 Gm8817        |
| ENSMUSG0000007080  | -1,167 | 0,000 Pole          |
| ENSMUSG00000113515 | -1,167 | 0,011 AL645745.1    |
| ENSMUSG00000090291 | -1,167 | 0,019 Lrrc10b       |
| ENSMUSG00000049538 | -1,170 | 0,000 Adamts16      |
| ENSMUSG00000025083 | -1,172 | 0,000 Afap1l2       |
| ENSMUSG00000026429 | -1,175 | 0,000 Ube2t         |
| ENSMUSG00000034303 | -1,178 | 0,002 Ccdc15        |
| ENSMUSG00000108120 | -1,180 | 0,030 9930120110Rik |
| ENSMUSG00000111264 | -1,184 | 0,005 E030022116Rik |
| ENSMUSG00000034648 | -1,185 | 0,001 Lrrm1         |
| ENSMUSG00000048424 | -1,187 | 0,000 Ranbp3l       |
| ENSMUSG00000037379 | -1,193 | 0,004 Spon2         |
| ENSMUSG00000060843 | -1,194 | 0,022 Ctnna3        |
| ENSMUSG00000026447 | -1,195 | 0,002 Pik3c2b       |
| ENSMUSG00000071489 | -1,196 | 0,048 Ptgdr         |
| ENSMUSG00000030322 | -1,199 | 0,000 Mbd4          |
| ENSMUSG00000114456 | -1,201 | 0,008 Hist1h2bh     |
| ENSMUSG00000030708 | -1,202 | 0,000 Dnajb13       |
| ENSMUSG00000039193 | -1,203 | 0,023 Nlrc4         |
| ENSMUSG00000037921 | -1,204 | 0,001 Ddx60         |
| ENSMUSG00000045215 | -1,205 | 0,017 Asxl3         |
| ENSMUSG00000114515 | -1,206 | 0,000 Aldoa         |
| ENSMUSG00000105311 | -1,213 | 0,001 Gm44574       |
| ENSMUSG00000103238 | -1,217 | 0,002 Gm36527       |
| ENSMUSG00000030110 | -1,221 | 0,000 Ret           |
| ENSMUSG00000022519 | -1,222 | 0,000 Srl           |

|                     |        |                     |
|---------------------|--------|---------------------|
| ENSMUSG00000104814  | -1,225 | 0,001 Gm42979       |
| ENSMUSG00000042489  | -1,228 | 0,000 Clspn         |
| ENSMUSG00000067714  | -1,234 | 0,000 Lpar5         |
| ENSMUSG00000093133  | -1,238 | 0,000 Gm25994       |
| ENSMUSG00000084821  | -1,240 | 0,007 Gm15880       |
| ENSMUSG00000055116  | -1,242 | 0,000 Arntl         |
| ENSMUSG00000090799  | -1,244 | 0,000 Khlh33        |
| ENSMUSG00000050334  | -1,247 | 0,000 C130071C03Rik |
| ENSMUSG00000098955  | -1,248 | 0,001 Mir6935       |
| ENSMUSG00000078144  | -1,251 | 0,000 Capns2        |
| ENSMUSG00000061577  | -1,253 | 0,004 Adgrg5        |
| ENSMUSG00000072812  | -1,256 | 0,044 Ahnak2        |
| ENSMUSG00000021678  | -1,257 | 0,027 F2r11         |
| ENSMUSG00000054074  | -1,257 | 0,000 Skida1        |
| ENSMUSG00000085995  | -1,261 | 0,008 Gm2788        |
| ENSMUSG000000053626 | -1,261 | 0,012 Tll1          |
| ENSMUSG00000075256  | -1,272 | 0,028 Cerkl         |
| ENSMUSG00000025432  | -1,274 | 0,004 Avil          |
| ENSMUSG00000028834  | -1,275 | 0,008 Trim63        |
| ENSMUSG00000019359  | -1,276 | 0,005 Gdpc2         |
| ENSMUSG00000024990  | -1,279 | 0,016 Rbp4          |
| ENSMUSG00000033033  | -1,281 | 0,000 Calhm2        |
| ENSMUSG000000059246 | -1,282 | 0,028 Foxb1         |
| ENSMUSG00000105201  | -1,286 | 0,004 Gm43362       |
| ENSMUSG00000110631  | -1,291 | 0,001 Gm42047       |
| ENSMUSG00000042793  | -1,296 | 0,006 Lgr6          |
| ENSMUSG00000110540  | -1,297 | 0,008 Gm45743       |
| ENSMUSG00000040828  | -1,297 | 0,046 Catsperd      |
| ENSMUSG00000107877  | -1,297 | 0,045 Gm43951       |
| ENSMUSG000000020080 | -1,304 | 0,035 Hkdc1         |
| ENSMUSG00000026778  | -1,306 | 0,000 Prkcq         |
| ENSMUSG00000103593  | -1,308 | 0,007 Gm37352       |
| ENSMUSG00000028392  | -1,308 | 0,000 Bspry         |
| ENSMUSG00000110087  | -1,317 | 0,045 Gm45309       |
| ENSMUSG00000041361  | -1,319 | 0,000 Myzap         |
| ENSMUSG00000004110  | -1,320 | 0,000 Cacna1e       |
| ENSMUSG00000113771  | -1,322 | 0,029 Gm36529       |
| ENSMUSG00000020682  | -1,326 | 0,000 Mmp28         |
| ENSMUSG00000054641  | -1,329 | 0,000 Mmrn1         |
| ENSMUSG00000090582  | -1,330 | 0,003 Gm17024       |
| ENSMUSG00000105742  | -1,332 | 0,002 Gm42748       |
| ENSMUSG00000115624  | -1,333 | 0,011 AC154640.4    |
| ENSMUSG00000113894  | -1,336 | 0,008 AC129597.1    |
| ENSMUSG00000106825  | -1,337 | 0,000 2510016D11Rik |
| ENSMUSG00000103285  | -1,337 | 0,010 Gm37274       |
| ENSMUSG00000025586  | -1,338 | 0,000 Cpeb1         |
| ENSMUSG00000046179  | -1,338 | 0,000 E2f8          |

|                      |        |                  |
|----------------------|--------|------------------|
| ENSMUSG00000111030   | -1,344 | 0,033 AC151971.2 |
| ENSMUSG000000032377  | -1,349 | 0,000 Plscr4     |
| ENSMUSG000000074207  | -1,353 | 0,001 Adh1       |
| ENSMUSG00000003545   | -1,356 | 0,000 Fosb       |
| ENSMUSG000000034858  | -1,357 | 0,000 Fam214a    |
| ENSMUSG000000024600  | -1,359 | 0,000 Slc27a6    |
| ENSMUSG000000058897  | -1,362 | 0,000 Col25a1    |
| ENSMUSG00000105950   | -1,372 | 0,035 Gm43679    |
| ENSMUSG000000075770  | -1,373 | 0,047 Gm22589    |
| ENSMUSG000000045498  | -1,377 | 0,018 Pcdhb3     |
| ENSMUSG00000103558   | -1,381 | 0,031 Gm38220    |
| ENSMUSG000000058743  | -1,382 | 0,002 Kcnj14     |
| ENSMUSG000000020623  | -1,384 | 0,000 Map2k6     |
| ENSMUSG000000070803  | -1,388 | 0,013 Cited4     |
| ENSMUSG000000098267  | -1,388 | 0,002 Mir7060    |
| ENSMUSG0000000105632 | -1,391 | 0,004 Gm43272    |
| ENSMUSG000000047592  | -1,393 | 0,038 Nxpe5      |
| ENSMUSG000000020154  | -1,394 | 0,002 Ptprb      |
| ENSMUSG000000076618  | -1,395 | 0,016 Ighj4      |
| ENSMUSG000000041479  | -1,396 | 0,000 Syt15      |
| ENSMUSG000000063430  | -1,398 | 0,017 Wscd2      |
| ENSMUSG000000035187  | -1,408 | 0,001 Nkx6-1     |
| ENSMUSG000000040016  | -1,408 | 0,000 Ptger3     |
| ENSMUSG000000025255  | -1,408 | 0,004 Zfhx4      |
| ENSMUSG00000105769   | -1,412 | 0,009 Gm43351    |
| ENSMUSG00000105748   | -1,414 | 0,009 Gm43088    |
| ENSMUSG000000032719  | -1,415 | 0,008 Sbspon     |
| ENSMUSG00000115317   | -1,417 | 0,042 AC139845.1 |
| ENSMUSG00000108551   | -1,419 | 0,007 Gm20274    |
| ENSMUSG0000000107000 | -1,423 | 0,000 Gm43481    |
| ENSMUSG000000107200  | -1,425 | 0,015 Gm43039    |
| ENSMUSG000000040710  | -1,426 | 0,000 St8sia4    |
| ENSMUSG000000098790  | -1,431 | 0,040 Mir6942    |
| ENSMUSG000000027939  | -1,432 | 0,001 Nup210l    |
| ENSMUSG00000107756   | -1,433 | 0,005 Gm44164    |
| ENSMUSG000000004359  | -1,434 | 0,000 Spic       |
| ENSMUSG0000000097151 | -1,440 | 0,034 Gm26514    |
| ENSMUSG000000090399  | -1,441 | 0,010 Gm38399    |
| ENSMUSG00000115417   | -1,443 | 0,009 AC131586.4 |
| ENSMUSG000000079049  | -1,460 | 0,049 Serpinb1c  |
| ENSMUSG000000085399  | -1,466 | 0,002 Foxd2os    |
| ENSMUSG000000003882  | -1,475 | 0,002 Il7r       |
| ENSMUSG000000022676  | -1,482 | 0,000 Snai2      |
| ENSMUSG0000000081683 | -1,482 | 0,000 Fzd10      |
| ENSMUSG000000087579  | -1,492 | 0,031 Hectd2os   |
| ENSMUSG000000006241  | -1,502 | 0,000 Ccdc159    |
| ENSMUSG00000106416   | -1,505 | 0,009 Gm5857     |

|                    |        |                     |
|--------------------|--------|---------------------|
| ENSMUSG00000114278 | -1,514 | 0,015 AC157931.1    |
| ENSMUSG00000022123 | -1,517 | 0,000 Scel          |
| ENSMUSG00000112358 | -1,519 | 0,001 AC108802.1    |
| ENSMUSG00000049872 | -1,520 | 0,002 Fam26e        |
| ENSMUSG00000113047 | -1,526 | 0,000 CT009718.2    |
| ENSMUSG00000105556 | -1,537 | 0,021 Gm43080       |
| ENSMUSG00000108841 | -1,540 | 0,013 Frmpd2        |
| ENSMUSG00000052951 | -1,551 | 0,033 C130021120Rik |
| ENSMUSG00000105929 | -1,551 | 0,039 Gm43693       |
| ENSMUSG00000104546 | -1,553 | 0,000 Gm43858       |
| ENSMUSG00000054999 | -1,555 | 0,000 Naalad1       |
| ENSMUSG00000102964 | -1,560 | 0,007 9430034N14Rik |
| ENSMUSG00000028838 | -1,562 | 0,020 Extl1         |
| ENSMUSG00000069270 | -1,563 | 0,000 Hist1h2ac     |
| ENSMUSG00000046480 | -1,563 | 0,007 Scn4b         |
| ENSMUSG00000108825 | -1,563 | 0,000 Gm45838       |
| ENSMUSG00000115149 | -1,575 | 0,041 AC112142.1    |
| ENSMUSG00000104342 | -1,578 | 0,032 Gm36401       |
| ENSMUSG00000106665 | -1,580 | 0,006 Gm43389       |
| ENSMUSG00000092457 | -1,582 | 0,027 Gm8835        |
| ENSMUSG00000043903 | -1,587 | 0,001 Zfp469        |
| ENSMUSG00000035681 | -1,587 | 0,000 Kcnc2         |
| ENSMUSG00000037846 | -1,593 | 0,000 Rtkn2         |
| ENSMUSG00000004872 | -1,601 | 0,028 Pax3          |
| ENSMUSG00000096351 | -1,612 | 0,004 Samd11        |
| ENSMUSG00000110422 | -1,619 | 0,020 Gm17999       |
| ENSMUSG00000108154 | -1,626 | 0,017 Gm44033       |
| ENSMUSG00000032940 | -1,627 | 0,039 Rbm11         |
| ENSMUSG00000104347 | -1,629 | 0,025 Gm37689       |
| ENSMUSG00000005640 | -1,631 | 0,026 Insrr         |
| ENSMUSG00000026308 | -1,641 | 0,036 Klhl30        |
| ENSMUSG00000022262 | -1,654 | 0,011 Dnah5         |
| ENSMUSG00000102555 | -1,657 | 0,038 6430511E19Rik |
| ENSMUSG00000044156 | -1,659 | 0,027 Hepacam2      |
| ENSMUSG00000021356 | -1,668 | 0,000 Irf4          |
| ENSMUSG00000108064 | -1,673 | 0,000 Gm44423       |
| ENSMUSG00000103509 | -1,676 | 0,021 Gm38372       |
| ENSMUSG00000113836 | -1,693 | 0,028 AC124426.1    |
| ENSMUSG00000103507 | -1,695 | 0,005 Gm38375       |
| ENSMUSG00000062372 | -1,701 | 0,030 Otof          |
| ENSMUSG00000046321 | -1,707 | 0,000 Hs3st2        |
| ENSMUSG00000018427 | -1,716 | 0,000 Ypel2         |
| ENSMUSG00000057132 | -1,721 | 0,016 Rpgrip1       |
| ENSMUSG00000049630 | -1,725 | 0,037 C1q3          |
| ENSMUSG00000084408 | -1,727 | 0,013 Gm11870       |
| ENSMUSG00000035095 | -1,729 | 0,005 Fam167a       |
| ENSMUSG00000026012 | -1,745 | 0,008 Cd28          |

|                    |        |                     |
|--------------------|--------|---------------------|
| ENSMUSG00000074629 | -1,777 | 0,014 4930518I15Rik |
| ENSMUSG00000030324 | -1,778 | 0,004 Rho           |
| ENSMUSG00000106099 | -1,784 | 0,006 Gm42664       |
| ENSMUSG00000022357 | -1,788 | 0,000 Klhl38        |
| ENSMUSG00000099398 | -1,798 | 0,002 Ms4a14        |
| ENSMUSG00000032291 | -1,827 | 0,005 Crabp1        |
| ENSMUSG00000103047 | -1,831 | 0,035 Gm37310       |
| ENSMUSG00000047419 | -1,839 | 0,000 Cmya5         |
| ENSMUSG00000097876 | -1,847 | 0,034 Gm16892       |
| ENSMUSG00000097081 | -1,854 | 0,005 Gm10425       |
| ENSMUSG00000038276 | -1,869 | 0,002 Asic3         |
| ENSMUSG00000035948 | -1,873 | 0,000 Acss3         |
| ENSMUSG00000103174 | -1,875 | 0,021 Gm37168       |
| ENSMUSG00000086296 | -1,879 | 0,041 D030055H07Rik |
| ENSMUSG00000039252 | -1,882 | 0,000 Lgi2          |
| ENSMUSG00000049115 | -1,890 | 0,035 Agtr1a        |
| ENSMUSG00000079177 | -1,891 | 0,038 Fam228a       |
| ENSMUSG00000064427 | -1,905 | 0,004 Gm22748       |
| ENSMUSG00000038756 | -1,910 | 0,002 Ttll6         |
| ENSMUSG00000058248 | -1,942 | 0,039 Kcnh1         |
| ENSMUSG00000107215 | -1,951 | 0,007 Gm43197       |
| ENSMUSG00000103133 | -1,961 | 0,005 Gm37303       |
| ENSMUSG00000034810 | -1,963 | 0,009 Scn7a         |
| ENSMUSG00000057777 | -1,968 | 0,039 Mab21l2       |
| ENSMUSG00000111390 | -2,030 | 0,000 CT025660.2    |
| ENSMUSG00000020061 | -2,042 | 0,028 Mybpc1        |
| ENSMUSG00000039313 | -2,069 | 0,000 AF529169      |
| ENSMUSG00000058934 | -2,077 | 0,004 Igf1os        |
| ENSMUSG00000115388 | -2,150 | 0,018 EPPK1         |
| ENSMUSG00000043719 | -2,177 | 0,000 Col6a6        |
| ENSMUSG00000039691 | -2,178 | 0,000 Tspan10       |
| ENSMUSG00000046634 | -2,193 | 0,018 Pkd1l1        |
| ENSMUSG00000038775 | -2,212 | 0,000 Vill          |
| ENSMUSG00000085783 | -2,223 | 0,017 Gm9816        |
| ENSMUSG00000005320 | -2,228 | 0,000 Fgfr4         |
| ENSMUSG00000073733 | -2,275 | 0,005 Rsg1          |
| ENSMUSG00000048782 | -2,314 | 0,001 Insc          |
| ENSMUSG00000093226 | -2,334 | 0,040 Gm25749       |
| ENSMUSG00000017767 | -2,379 | 0,000 Spata25       |
| ENSMUSG00000033634 | -2,389 | 0,024 Nat8f2        |
| ENSMUSG00000108970 | -2,393 | 0,027 Gm45906       |
| ENSMUSG00000097623 | -2,425 | 0,031 B230323A14Rik |
| ENSMUSG00000079173 | -2,433 | 0,002 Zan           |
| ENSMUSG00000060284 | -2,440 | 0,001 Sp7           |
| ENSMUSG00000109896 | -2,474 | 0,024 Gm31409       |
| ENSMUSG00000092229 | -2,477 | 0,022 Gm5977        |
| ENSMUSG00000040372 | -2,520 | 0,014 Gpr63         |



|                    |        |                     |
|--------------------|--------|---------------------|
| ENSMUSG00000100832 | -2,565 | 0,050 Gm29260       |
| ENSMUSG00000018486 | -2,626 | 0,008 Wnt9b         |
| ENSMUSG00000073130 | -2,628 | 0,001 Gm1141        |
| ENSMUSG00000097021 | -2,656 | 0,000 4933433G15Rik |
| ENSMUSG00000097336 | -2,693 | 0,000 Fendrr        |
| ENSMUSG00000029431 | -2,717 | 0,018 B3gnt4        |
| ENSMUSG00000110997 | -2,719 | 0,008 2610028D06Rik |
| ENSMUSG00000110397 | -2,906 | 0,000 Gm45540       |
| ENSMUSG00000067578 | -3,163 | 0,013 Cbln4         |
| ENSMUSG00000085882 | -4,015 | 0,000 2610507I01Rik |
| ENSMUSG00000039628 | -4,018 | 0,002 Hs3st6        |
| ENSMUSG00000021732 | -4,447 | 0,015 Fgf10         |
| ENSMUSG00000021590 | -5,110 | 0,019 Spata9        |

**Supplementary table 4: mRNA values of phenotype associated genes used to create Figure 6B.**

|        | CEREBRUM IL1 vs PBS |             |                |             |             | CEREBELLUM IL1 vs PBS |             |                |             |             |
|--------|---------------------|-------------|----------------|-------------|-------------|-----------------------|-------------|----------------|-------------|-------------|
|        | Mean CR PBS         | Mean CR IL1 | log2FoldChange | Fold Change | p adj value | Mean CB PBS           | Mean CB IL1 | log2FoldChange | Fold Change | p adj value |
| Ptgs2  | 634,872             | 852,267     | -0,037         | 0,974       | 9,623E-01   | 417,839               | 535,091     | 0,822          | 1,767       | 1,641E-01   |
| Nos2   | 85,514              | 323,142     | 1,867          | 3,648       | 4,745E-06   | 66,809                | 195,838     | 1,603          | 3,038       | 2,230E-04   |
| Tnf    | 8296,125            | 9152,485    | -0,057         | 0,961       | 9,537E-01   | 9211,302              | 9984,824    | 0,315          | 1,244       | 7,799E-01   |
| Il6    | 55,840              | 179,689     | 1,741          | 3,342       | 2,680E-05   | 19,942                | 93,231      | 2,153          | 4,448       | 1,100E-06   |
| Cd86   | 5784,204            | 7087,705    | 0,258          | 1,196       | 6,782E-01   | 7673,717              | 8752,218    | 0,225          | 1,168       | 7,954E-01   |
| Cd206  | 77056,546           | 106254,064  | 0,516          | 1,430       | 4,149E-01   | 57893,656             | 77797,566   | 0,374          | 1,296       | 6,677E-01   |
| Arg1   | 64,446              | 31,973      | -1,097         | 0,467       | 3,926E-01   | 0,679                 | 0,808       | 0,575          | 1,490       | 8,461E-01   |
| Igf1   | 3660,409            | 2819,899    | -0,755         | 0,593       | 1,213E-01   | 4844,813              | 3048,979    | -0,290         | 0,818       | 7,048E-01   |
| Lgals3 | 844,245             | 1699,667    | 1,001          | 2,001       | 1,040E-06   | 988,471               | 1558,167    | 0,666          | 1,587       | 3,286E-03   |
| Il4ra  | 16328,818           | 42707,224   | 1,328          | 2,511       | 6,245E-12   | 15932,171             | 31384,115   | 1,037          | 2,052       | 3,085E-07   |
| Il1rn  | 239,780             | 722,219     | 1,530          | 2,888       | 2,471E-08   | 344,748               | 527,274     | 0,673          | 1,595       | 4,428E-02   |
| Socs3  | 11252,499           | 14539,621   | 0,232          | 1,174       | 3,158E-01   | 6853,289              | 8752,910    | 0,491          | 1,405       | 2,016E-02   |
| Sphk1  | 77,297              | 97,485      | 0,202          | 1,150       | 7,120E-01   | 23,959                | 23,644      | 0,137          | 1,100       | 8,781E-01   |

**Supplementary table 5:****Gene list used to build the DEG heat map and analysis for clusters (Figure 6C).**

| <i>Gene name</i> | <i>CR_PBS</i> | <i>CR_IL1</i> | <i>CB_PBS</i> | <i>CB_IL1</i> |
|------------------|---------------|---------------|---------------|---------------|
| Nipal1           | 0             | 1,74229447    | 0             | 2,88945588    |
| Serpina3g        | 42,5731542    | 1075,17095    | 30,163386     | 1222,10698    |
| Bmp8a            | 0,27850422    | 3,17637015    | 0             | 2,03865217    |
| Iigp1            | 31,6976738    | 484,819951    | 16,2763238    | 448,538975    |
| Tgtp2            | 7,36592876    | 66,981111     | 3,09389379    | 67,9207943    |
| Prss16           | 11,5669603    | 285,256612    | 4,37629728    | 110,298806    |
| Ccl17            | 1,84085398    | 30,0343532    | 0,38720443    | 17,6883558    |
| Foxd3            | 1,7284899     | 0,58134746    | 0             | 6,35058097    |
| Plet1            | 5,19335138    | 130,522177    | 4,97306319    | 105,347239    |
| Spr-ps1          | 3,10636624    | 10,4280879    | 0,28883159    | 8,79422977    |
| Tgtp1            | 3,05235703    | 51,2585694    | 2,20222287    | 39,4145917    |
| Mirt2            | 11,1631276    | 42,3610414    | 0,93947794    | 16,9860902    |
| Mpz              | 36,2167029    | 24,1848916    | 29,7358892    | 661,872512    |
| Slc28a3          | 0,77865717    | 17,3362508    | 0,67879482    | 5,2736339     |
| Serpina3h        | 28,7795977    | 678,485681    | 33,0675781    | 399,97385     |
| Jaml             | 37,2038877    | 1384,87321    | 46,5858409    | 414,415169    |
| Gzma             | 16,7705398    | 41,9843723    | 2,56348181    | 60,124744     |
| Serpina3e-ps     | 6,29640715    | 113,756834    | 5,66833071    | 71,4289031    |
| Steap4           | 61,6969308    | 641,15698     | 24,5707973    | 335,453198    |
| Ms4a4b           | 10,9240359    | 29,0612765    | 2,2213256     | 22,2709444    |
| Gm5416           | 39,2335885    | 276,263002    | 11,7801628    | 124,502136    |
| Serpina3i        | 13,4453085    | 285,056831    | 14,6687362    | 144,14846     |
| Apol10b          | 5,88189453    | 18,1094061    | 2,29154998    | 19,7506508    |
| Serpina3f        | 17,219472     | 251,143012    | 14,1760303    | 189,556769    |
| Gbp4             | 174,618399    | 842,081986    | 95,2382737    | 869,368465    |
| Cxcl11           | 4,12383461    | 36,9628224    | 4,71216654    | 32,6927362    |
| Gbp10            | 11,4501225    | 58,2070921    | 7,65733519    | 64,0796169    |
| Rnase2a          | 27,3326586    | 71,2569522    | 1,32944117    | 14,0113612    |
| Il1r2            | 155,248679    | 1492,24788    | 85,1289719    | 811,413805    |
| Zbtb16           | 37,4882934    | 306,935168    | 26,0541389    | 186,980137    |
| Il2rb            | 6,81741592    | 30,4850416    | 3,82070915    | 21,7319455    |
| Cxcl9            | 20,0566008    | 85,5313956    | 6,40915359    | 56,2005473    |
| Plet1os          | 4,01147053    | 40,8248696    | 5,96310694    | 55,1909425    |
| Nrg4             | 4,54739971    | 29,5856199    | 3,44976391    | 27,5296112    |
| Gm807            | 1,75498534    | 16,6942587    | 0,67879482    | 6,79715055    |
| 2010005H15F      | 90,1597164    | 456,234286    | 48,6723659    | 348,009932    |
| Rab44            | 59,457162     | 355,433334    | 27,2441582    | 181,41108     |
| Cpm              | 11,5056263    | 85,775998     | 8,54603378    | 56,1483565    |
| Gm9733           | 16,1619347    | 47,7507923    | 4,63621105    | 32,3154703    |
| E230001N04F      | 7,11391513    | 37,8398723    | 4,80204947    | 40,5366457    |
| Upp1             | 34,1031081    | 211,458844    | 16,5705365    | 136,96468     |
| Klf9             | 128,671324    | 932,525486    | 69,9512785    | 388,744881    |

|          |            |            |            |            |
|----------|------------|------------|------------|------------|
| Gng13    | 4,99087328 | 3,3177586  | 0,67879482 | 16,3308997 |
| Vcam1    | 736,957267 | 4706,6674  | 597,876984 | 3443,31195 |
| Orm1     | 6,00666617 | 50,4179385 | 3,55408139 | 24,41598   |
| Ifit3b   | 75,9306222 | 95,6161885 | 58,9357295 | 469,295296 |
| Rnase1   | 0,50267065 | 4,64553595 | 0,72660184 | 3,56926364 |
| Areg     | 12,797634  | 42,1800204 | 2,83045187 | 26,6863034 |
| Gm10143  | 5,53781576 | 3,74434351 | 0,28883159 | 4,17757697 |
| Sell     | 151,644402 | 604,758021 | 70,9644479 | 427,638892 |
| Kcna5    | 8,93849694 | 70,9826187 | 7,3057062  | 45,3920957 |
| Jdp2     | 1021,5941  | 4858,33341 | 857,32504  | 5154,07072 |
| Nlrp12   | 25,4380327 | 109,171902 | 12,1865987 | 63,1941221 |
| Kcna1    | 0,53844688 | 0,94977853 | 1,08544428 | 5,9134593  |
| Gm10603  | 3,32969046 | 10,2903105 | 3,09389379 | 17,4336514 |
| Csf3     | 11,5730662 | 18,8957189 | 3,06574532 | 19,6557093 |
| Pla1a    | 8,72808497 | 50,2420879 | 8,43428933 | 42,856053  |
| Il2ra    | 2,21511669 | 10,7240757 | 0,96486761 | 6,52274917 |
| Retnlg   | 653,07884  | 3475,90468 | 312,881314 | 1680,74137 |
| Mc5r     | 1,84509935 | 7,06416052 | 1,44725904 | 3,62265592 |
| Arc      | 101,333306 | 473,904458 | 186,003063 | 879,923684 |
| Fcnaos   | 7,65717396 | 18,130271  | 2,46566479 | 10,9823988 |
| Ifit1    | 103,757141 | 150,25367  | 84,68938   | 453,34525  |
| Tomt     | 15,2362607 | 12,9802032 | 5,99457003 | 23,9353022 |
| Stra6    | 285,789933 | 714,668677 | 51,0155916 | 292,936346 |
| Trim69   | 12,6179677 | 16,8516066 | 24,7218902 | 118,014918 |
| Gm10524  | 8,42616959 | 24,1246242 | 1,39966554 | 12,9497512 |
| Gm12250  | 32,1677243 | 104,120168 | 19,8471198 | 114,42695  |
| Hif3a    | 871,493914 | 4336,38175 | 777,142449 | 3412,28419 |
| Mrgpra2b | 6,94297273 | 24,7443251 | 3,03738333 | 14,7569612 |
| Fpr2     | 157,978378 | 487,585847 | 62,9455802 | 302,722462 |
| Gm16194  | 5,83879835 | 31,102898  | 4,05578908 | 20,460223  |
| Cd3d     | 22,4195391 | 90,1861908 | 9,77821376 | 51,3008745 |
| Fkbp5    | 3102,02343 | 17314,4976 | 3345,14613 | 15608,9787 |
| Gbp2     | 549,107564 | 2644,27788 | 548,184624 | 2278,06228 |
| Mrap     | 15,0287472 | 79,4450541 | 12,436625  | 50,655431  |
| Trbc2    | 3,59215082 | 7,6305492  | 0,70121217 | 8,27457516 |
| Map3k6   | 110,579845 | 433,204385 | 74,1065271 | 367,92297  |
| Lbx1     | 301,58835  | 1261,69436 | 252,903589 | 1091,72999 |
| Gm26473  | 17,5253856 | 63,310579  | 16,8727914 | 74,1984365 |
| Il6      | 55,8399344 | 179,689106 | 19,9418797 | 93,2312525 |
| Gm15675  | 13,4505819 | 36,9911782 | 2,77967253 | 8,68176785 |
| Oas3     | 44,1171094 | 113,250343 | 24,5917607 | 114,183277 |
| Ccl5     | 32,3087444 | 61,3293374 | 11,3955884 | 52,3316736 |
| Capn11   | 0,7138678  | 3,43275072 | 0,67879482 | 2,98006767 |
| Vwc2     | 1,22330154 | 4,92041254 | 2,2216679  | 5,57009084 |
| Hdc      | 176,059513 | 835,69382  | 107,332923 | 525,544672 |
| Rdh12    | 36,8464304 | 134,558704 | 15,2585022 | 67,3246392 |

|              |            |            |            |            |
|--------------|------------|------------|------------|------------|
| Hs3st3b1     | 133,921682 | 1150,41557 | 141,598297 | 461,214076 |
| Serpinb10    | 23,119738  | 65,2244366 | 11,4390695 | 52,2168274 |
| Gm43181      | 16,905044  | 56,2686101 | 6,54387122 | 28,3010222 |
| Slfn1        | 84,295015  | 394,376496 | 42,364399  | 199,091922 |
| Cdh3         | 24,9990712 | 29,7526872 | 0          | 4,54063068 |
| Gbp2b        | 52,1251823 | 120,033461 | 37,7907765 | 165,711514 |
| Il1f9        | 52,9167697 | 176,467072 | 26,2470628 | 106,676229 |
| Mefv         | 24,9769637 | 67,984765  | 11,5170632 | 48,175395  |
| Creb5        | 110,462027 | 629,08735  | 53,8098605 | 197,525802 |
| 1700016G22F  | 3,27904116 | 5,08049491 | 12,2658201 | 50,0262859 |
| Ly6i         | 17,9165915 | 56,2883301 | 14,6051534 | 51,8042725 |
| Vdr          | 45,8143253 | 396,694712 | 41,0236807 | 106,557401 |
| Atp1a4       | 2,56265565 | 5,01821496 | 0,38720443 | 6,01686584 |
| Gm43302      | 51,452626  | 165,860064 | 40,6113802 | 153,764694 |
| Ddit4        | 525,325662 | 2113,47128 | 488,865701 | 2122,91217 |
| Prss23       | 113,910226 | 386,621212 | 51,1769597 | 248,069077 |
| Gm20109      | 4,87543462 | 15,2690748 | 4,41760384 | 21,2339894 |
| Gm26586      | 4,18979478 | 18,2022405 | 3,40238393 | 14,4102481 |
| Ifi205       | 9,88408428 | 36,5076975 | 9,72420454 | 33,736999  |
| Gm45774      | 4,1793432  | 13,5029552 | 2,07846036 | 11,5481552 |
| Fam107a      | 67,9963098 | 186,169968 | 22,8420849 | 97,5625698 |
| Gm8463       | 3,12721236 | 9,84582513 | 26,7329854 | 110,97232  |
| Ttc39c       | 18,718941  | 68,2773855 | 11,2841862 | 52,2333627 |
| I830127L07Ri | 70,7217177 | 236,140645 | 40,2739409 | 157,279755 |
| S100a7a      | 1,25231468 | 6,40720039 | 1,37724819 | 2,33788056 |
| Prss12       | 3,3989535  | 10,8169999 | 2,29706757 | 13,1386772 |
| Cd300lf      | 732,03756  | 4211,67566 | 427,760059 | 1822,92826 |
| Gbp5         | 561,405472 | 2022,42425 | 571,006539 | 1668,53163 |
| B9d1os       | 2,33055535 | 1,47503982 | 0,38720443 | 6,71717724 |
| Trim30b      | 133,665134 | 312,536211 | 62,1355302 | 237,998315 |
| Ly6g         | 42,8118046 | 171,654211 | 25,9648117 | 96,791479  |
| Adam8        | 548,525511 | 2225,35999 | 335,499981 | 1200,55811 |
| Ifnlr1       | 18,2712221 | 42,8264863 | 6,27117004 | 19,925569  |
| Gda          | 230,482286 | 889,609063 | 136,48366  | 493,047999 |
| Galnt15      | 48,2479168 | 148,035679 | 30,3494625 | 112,477452 |
| Dok2         | 1194,16002 | 4843,66297 | 812,23535  | 3293,73843 |
| Ccl12        | 4643,11216 | 20025,656  | 3474,69142 | 14083,0814 |
| Cx3cl1       | 139,702223 | 722,274901 | 128,134107 | 470,9682   |
| Arg2         | 45,1192898 | 130,797254 | 23,9251567 | 103,381162 |
| Gm28592      | 1,04111753 | 5,80573085 | 1,86282547 | 4,18899515 |
| Mmp8         | 481,320609 | 1366,12867 | 264,979273 | 890,362597 |
| Cd55         | 192,627737 | 491,318853 | 58,4648197 | 225,158766 |
| Gbp6         | 59,1449622 | 169,881485 | 40,8244698 | 137,262244 |
| Ifit3        | 264,782988 | 362,961569 | 196,172068 | 732,076621 |
| Eomes        | 3,26238339 | 5,4246778  | 0,74901919 | 2,07154942 |
| Ramp3        | 4,41357559 | 19,8196646 | 3,94128582 | 12,7257749 |

|             |            |            |            |            |
|-------------|------------|------------|------------|------------|
| Htr2a       | 7,74616452 | 13,1812058 | 1,0884166  | 5,89119943 |
| Il15ra      | 325,298016 | 1196,55942 | 194,57547  | 631,279489 |
| Clec4d      | 166,63836  | 823,131438 | 108,589317 | 406,191374 |
| Arhgef37    | 19,9000652 | 42,1656252 | 10,170807  | 41,53833   |
| Acod1       | 51,1997872 | 179,01235  | 25,6571757 | 108,221008 |
| Gpr141      | 55,9723928 | 148,8749   | 29,3672804 | 110,05239  |
| Chrm3       | 5,54168037 | 17,6154193 | 3,7726886  | 11,8539008 |
| Wfdc21      | 162,602591 | 381,764521 | 54,6985358 | 216,444479 |
| Clec4e      | 230,976405 | 509,823798 | 110,259699 | 354,957609 |
| Nt5e        | 100,564992 | 142,356447 | 14,3655061 | 57,5213969 |
| Chil5       | 35,9043317 | 74,5884233 | 19,9831423 | 63,6446946 |
| Aqp9        | 11,3952279 | 36,6875822 | 8,91413549 | 33,7032597 |
| Mir147      | 11,1089422 | 32,0150864 | 4,48761469 | 16,7705918 |
| Ifit1bl1    | 21,120492  | 28,1549714 | 16,7019756 | 80,4865472 |
| Esyt3       | 12,5875603 | 9,56376823 | 2,97663174 | 12,509087  |
| A930030B08F | 6,59235917 | 16,9274537 | 8,13938432 | 23,7592032 |
| Gm26448     | 9,01587482 | 11,7092641 | 4,76549116 | 16,2394878 |
| Socs2       | 151,888416 | 1361,10911 | 206,175705 | 453,159004 |
| Stfa2l1     | 736,301286 | 1999,07973 | 308,783301 | 1087,66128 |
| Syde2       | 4,58200514 | 12,5227761 | 2,3448746  | 6,27769277 |
| Ocstamp     | 13,002249  | 84,3507842 | 14,3304865 | 42,0738044 |
| Tarm1       | 45,1404979 | 147,485326 | 19,7881928 | 67,104628  |
| A330023F24F | 10,0919786 | 16,2671103 | 2,63073386 | 14,3877914 |
| Ms4a8a      | 14,0814322 | 36,0577475 | 7,9714717  | 27,959638  |
| Abtb2       | 68,0319196 | 327,960351 | 58,7977493 | 163,049185 |
| Slc16a14    | 23,1135743 | 66,0103795 | 17,593433  | 56,1335173 |
| Pdzd3       | 19,1899854 | 41,3269013 | 16,1683494 | 67,0433075 |
| Tmem252     | 178,78303  | 550,804219 | 92,1883965 | 333,806404 |
| Ifi44       | 22,8483776 | 30,448843  | 16,6022492 | 50,5236688 |
| F10         | 94,2237225 | 322,822611 | 50,5325079 | 188,831655 |
| Runx3       | 55,8000269 | 222,841674 | 19,675635  | 64,9199973 |
| Prok2       | 65,9997092 | 198,471123 | 27,3836131 | 99,1407606 |
| Hspa1b      | 993,758933 | 4120,49528 | 374,466821 | 934,13305  |
| Gm38150     | 3,5457469  | 13,1530294 | 4,12877225 | 12,6818392 |
| Gm42928     | 1,61416984 | 3,69206367 | 1,01543343 | 3,64845835 |
| Gm5483      | 940,424101 | 2899,28086 | 392,767903 | 1517,27028 |
| Sh3pxd2b    | 853,566234 | 3410,20722 | 795,65829  | 2183,44501 |
| Mx1         | 356,81148  | 328,72851  | 240,114331 | 677,118484 |
| Gm14964     | 1,80680543 | 8,75624284 | 2,61128883 | 6,60961297 |
| Gm11620     | 14,6810273 | 11,1558586 | 13,8863446 | 40,5783993 |
| Scn2b       | 21,211396  | 52,8476655 | 13,7470075 | 44,4851648 |
| Slc39a14    | 882,251475 | 3546,32304 | 640,98472  | 1597,73537 |
| Ccl8        | 58,6202316 | 113,927412 | 16,5190726 | 54,6148627 |
| Chdh        | 4,02247899 | 8,60910223 | 0,28883159 | 2,5833381  |
| 1700047M11  | 13,9108135 | 34,4574049 | 4,1767928  | 16,3716973 |
| Vcan        | 144,410079 | 428,047248 | 153,653702 | 441,156426 |



|             |            |            |            |            |
|-------------|------------|------------|------------|------------|
| Cmpk2       | 116,356348 | 158,149036 | 86,348931  | 344,290445 |
| Gm23935     | 191,418799 | 754,256358 | 402,607981 | 1336,21251 |
| Prnd        | 144,358531 | 366,577647 | 62,7417608 | 188,723927 |
| Il12rb1     | 17,7391575 | 37,380594  | 11,4498959 | 40,3322266 |
| Oasl1       | 101,852327 | 165,654533 | 66,3161901 | 200,730004 |
| Camp        | 616,443338 | 1984,45646 | 314,533292 | 1218,70588 |
| Cldn1       | 22,106039  | 48,2100639 | 4,12842995 | 17,1758024 |
| Mgp         | 370,759898 | 479,739424 | 47,5764202 | 204,959649 |
| Arl9        | 14,2661812 | 16,3996212 | 12,846162  | 42,036956  |
| Gjc3        | 2,80421286 | 1,37636344 | 8,91668076 | 39,4089594 |
| Nos2        | 85,513575  | 323,142343 | 66,8091616 | 195,837819 |
| Ltb4r1      | 144,663378 | 333,187533 | 73,166223  | 194,980794 |
| Lefty1      | 26,2079283 | 102,379453 | 23,5522988 | 71,5656229 |
| Per2        | 334,319251 | 911,92495  | 223,749654 | 593,18745  |
| Adora2b     | 24,7686031 | 87,7540654 | 22,1171505 | 59,2775313 |
| 1700014D04F | 2,98583998 | 8,5028039  | 4,95947805 | 13,2484053 |
| Pdgfc       | 66,8861908 | 225,44773  | 35,1711735 | 96,4444561 |
| Ly6c2       | 71,4215213 | 259,833818 | 45,5195718 | 164,072251 |
| Slc28a2     | 28,1751668 | 76,2266757 | 21,776855  | 66,6625259 |
| Gjc2        | 8,48480009 | 9,73734655 | 7,13002431 | 27,6911172 |
| Hhip12      | 5,71771037 | 4,90029046 | 6,91736174 | 31,7487299 |
| Gm4759      | 21,1845768 | 20,6652125 | 11,2310751 | 31,9796139 |
| Dhrs9       | 65,9994526 | 189,490618 | 34,0220871 | 108,857476 |
| Slc10a6     | 69,2207348 | 189,969816 | 38,768689  | 119,196614 |
| Gm9899      | 1,7310076  | 4,58837791 | 1,40263786 | 6,17131046 |
| Cyp4f18     | 144,430459 | 329,210308 | 77,3504882 | 175,837407 |
| Mcomp1      | 222,12398  | 512,229028 | 96,6832417 | 287,796324 |
| Tacstd2     | 26,1216977 | 69,3383864 | 9,0900309  | 37,0729707 |
| Rsad2       | 197,080271 | 207,155844 | 138,657479 | 512,266604 |
| Sema6b      | 440,642253 | 1723,99155 | 324,648277 | 865,617447 |
| Cdc42ep2    | 137,969567 | 381,113073 | 146,761193 | 428,037913 |
| Cdr2        | 322,548712 | 1031,42569 | 259,001162 | 747,897569 |
| Plin4       | 2,53498942 | 6,43684885 | 1,83136238 | 5,08845803 |
| Trem1       | 403,257281 | 1168,86678 | 201,831127 | 623,948364 |
| Pawr        | 35,7177353 | 69,7507028 | 8,22926725 | 28,8385984 |
| Asprv1      | 409,65719  | 863,666431 | 169,889899 | 502,043443 |
| 3930402G23F | 6,1468726  | 17,5686937 | 1,2536992  | 6,48806561 |
| Hp          | 774,693641 | 1892,10144 | 353,586985 | 1211,30712 |
| Gja1        | 1721,69873 | 3840,23922 | 875,967611 | 2475,01689 |
| Usp18       | 166,589737 | 207,912908 | 156,746224 | 483,082703 |
| Cnksr1      | 6,12042934 | 7,3377308  | 8,07977276 | 21,8365845 |
| Map2k3os    | 31,4619893 | 85,2763788 | 34,550968  | 93,9214159 |
| Klra2       | 58,3169309 | 143,61177  | 27,5487055 | 74,288815  |
| AA467197    | 27,8808763 | 65,9771983 | 14,3292101 | 44,096727  |
| Egfr        | 467,47305  | 1283,42264 | 403,178147 | 1064,83717 |
| Cish        | 131,043163 | 640,371934 | 144,900959 | 305,204283 |

|             |            |            |            |            |
|-------------|------------|------------|------------|------------|
| G0s2        | 86,2035519 | 244,41516  | 33,2661073 | 99,8462137 |
| Timp1       | 32,7283112 | 95,8790431 | 12,8518932 | 41,7698474 |
| Ehd1        | 5252,71068 | 15273,0302 | 3730,70671 | 10784,9934 |
| Tcap        | 15,1709047 | 24,2241399 | 25,387998  | 62,269059  |
| Gm8430      | 7,67578771 | 12,8158729 | 6,75993316 | 20,750766  |
| Igfbp3      | 409,671546 | 1045,81351 | 258,093069 | 712,512347 |
| Hspa1l      | 17,9886911 | 25,5866969 | 25,8662254 | 80,7049528 |
| Met         | 55,8858581 | 130,389002 | 51,8245334 | 128,520677 |
| Gm44777     | 5,81598656 | 6,63976515 | 2,92253777 | 11,8172556 |
| Ifit1bl2    | 7,58505978 | 8,11512473 | 5,19498502 | 15,1284637 |
| Tbx21       | 2,83187909 | 7,87811412 | 3,11928346 | 7,50178421 |
| Emp1        | 347,23382  | 1002,44444 | 317,78272  | 799,603322 |
| Atp8b4      | 73,8629642 | 203,654924 | 43,9943678 | 123,185201 |
| Mt2         | 1334,23454 | 7932,85109 | 1657,11598 | 4033,48635 |
| Snord55     | 5,85796898 | 22,5735438 | 7,03462379 | 22,1233892 |
| Adrb1       | 236,431789 | 608,928763 | 126,991779 | 307,402363 |
| Mir17hg     | 101,216517 | 195,676963 | 63,7202827 | 145,154941 |
| Isg15       | 254,797983 | 412,016918 | 272,688448 | 814,0845   |
| Far2        | 78,7204807 | 201,138373 | 56,088163  | 144,460125 |
| Gm43802     | 603,065396 | 1383,49541 | 615,768213 | 1328,74489 |
| C1qtnf9     | 7,39186732 | 14,4600452 | 7,92099063 | 24,179766  |
| Shisa2      | 19,8864006 | 45,1441047 | 15,0144206 | 32,9681077 |
| Gm24958     | 26,1780681 | 26,6098225 | 9,61479183 | 20,9589739 |
| AL645522.1  | 27,2154971 | 26,9264154 | 9,61479183 | 20,9589739 |
| Igtp        | 612,955118 | 1263,63208 | 677,109821 | 1697,35592 |
| Snord37     | 26,3960186 | 21,7674515 | 10,1257588 | 21,6531746 |
| Zbp1        | 183,77714  | 372,198189 | 136,860017 | 360,71348  |
| 6030468B19F | 16,5483815 | 49,7193452 | 13,5731909 | 38,702091  |
| 1700109H08F | 29,397917  | 32,9194277 | 11,4759701 | 26,930351  |
| Ifit2       | 448,249132 | 562,547052 | 468,504384 | 1414,77346 |
| Syt6        | 9,55431685 | 24,1322189 | 11,1260731 | 28,2373615 |
| Sapcd1      | 65,2582526 | 100,226399 | 46,3571611 | 159,057717 |
| Gbp8        | 115,877409 | 154,303426 | 54,3028728 | 138,280608 |
| Ucp1        | 11,7742406 | 12,475064  | 11,2554819 | 31,8387663 |
| Tgm2        | 979,056758 | 2108,05367 | 585,652686 | 1478,45087 |
| Meox1       | 25,7442749 | 77,1501501 | 16,3813542 | 41,6419935 |
| Ascl2       | 49,7447205 | 254,099784 | 66,9794467 | 164,527372 |
| Gpat3       | 47,0288271 | 151,349445 | 42,6965545 | 93,6063072 |
| Socs1       | 95,4482521 | 248,570357 | 139,212533 | 314,96945  |
| Chil1       | 648,40531  | 1482,29106 | 301,431807 | 873,592243 |
| Plbd1       | 359,858879 | 713,339429 | 190,325562 | 514,750405 |
| C5ar1       | 3755,9652  | 13234,8455 | 3949,97546 | 10141,4018 |
| Rpl7a-ps7   | 9,12744888 | 16,0509511 | 8,06971577 | 22,0627289 |
| S100a6      | 420,041626 | 1119,72651 | 230,669805 | 648,69778  |
| Ldhd        | 10,4565797 | 20,3314207 | 9,78338905 | 27,8412407 |
| Batf2       | 136,045264 | 267,68909  | 81,6936989 | 176,650985 |

|             |            |            |            |            |
|-------------|------------|------------|------------|------------|
| Gm16287     | 14,1529798 | 5,44992179 | 12,0334189 | 39,6882187 |
| Xdh         | 468,815033 | 876,671232 | 241,859212 | 588,17486  |
| Gm26797     | 23,8453236 | 23,4091237 | 10,313801  | 29,4339201 |
| Ifi204      | 563,85187  | 921,8189   | 380,506141 | 944,831733 |
| Napsa       | 211,310834 | 488,882311 | 115,167059 | 275,274601 |
| Gm29264     | 21,5399878 | 25,6032818 | 16,9614339 | 42,4732765 |
| Efna2       | 29,9726156 | 35,176974  | 75,5934765 | 233,641344 |
| Ifi47       | 283,900248 | 587,518647 | 244,244995 | 592,099719 |
| Prn         | 188,039382 | 420,310913 | 100,213877 | 231,853006 |
| Bbs12       | 69,2770904 | 179,56031  | 72,53163   | 140,726594 |
| Snord14e    | 94,9369056 | 98,9164863 | 25,9530072 | 69,5698753 |
| Ppef2       | 49,6054174 | 47,9867385 | 25,010984  | 63,3783106 |
| Erich3      | 8,56814618 | 28,2499355 | 8,93655284 | 20,2712917 |
| Trpc6       | 13,8394845 | 25,5271101 | 6,38156094 | 21,0537274 |
| Cd209b      | 460,093907 | 892,13502  | 309,174461 | 738,605694 |
| CT009713.7  | 43,7547073 | 50,6553933 | 26,8272789 | 62,5834159 |
| Cfap69      | 9,89084737 | 35,2092351 | 12,9228869 | 23,2517594 |
| Nox4        | 19,1292083 | 26,7628371 | 9,76781446 | 23,747785  |
| Irf7        | 508,035419 | 731,29063  | 492,363435 | 1170,22981 |
| Cldn19      | 8,21865608 | 10,0486196 | 13,806575  | 40,4544278 |
| Kcnn4       | 53,6148757 | 184,951449 | 58,42901   | 135,201001 |
| A530076I17R | 9,88040064 | 17,7444158 | 6,68970878 | 19,1744614 |
| Gm31718     | 64,550962  | 129,320144 | 40,1073408 | 99,0059904 |
| Rasd1       | 68,3768927 | 205,918218 | 61,030738  | 110,269883 |
| Rhov        | 31,0705886 | 83,2781109 | 23,9987364 | 61,7048868 |
| Rnd3        | 93,5988503 | 330,799298 | 112,865332 | 209,252465 |
| Afap111     | 2118,27837 | 4415,8913  | 1489,71246 | 3503,63486 |
| Vgf         | 12,999503  | 20,1110135 | 11,0179008 | 27,9478187 |
| Runx1       | 4575,31194 | 13385,8525 | 4828,60497 | 10648,2407 |
| Thbs1       | 2154,56118 | 4814,95775 | 1767,51096 | 3450,62007 |
| Fabp4       | 12,3808368 | 39,6533336 | 9,64095085 | 22,5018123 |
| 4933406C10R | 5,50847404 | 12,2374992 | 5,90659648 | 12,7210429 |
| S100a10     | 237,780353 | 526,537304 | 144,346406 | 355,036122 |
| Srgn        | 2574,00714 | 7545,6005  | 2179,17952 | 4526,16553 |
| Mmp19       | 536,289312 | 1810,6063  | 543,945946 | 1032,62178 |
| Kit         | 189,054456 | 306,426684 | 79,9251449 | 171,905204 |
| Il18rap     | 206,369824 | 567,686856 | 142,645629 | 323,701275 |
| Sult1a1     | 1046,98403 | 1947,51718 | 809,367829 | 1860,09688 |
| Klf4        | 6256,16741 | 9798,10278 | 5042,32988 | 9466,54222 |
| Mlph        | 167,028403 | 352,34281  | 243,513941 | 693,778838 |
| Hs3st3a1    | 9,56980868 | 29,6655244 | 10,1227865 | 18,9930335 |
| Ctla2b      | 668,774096 | 1709,00091 | 469,012161 | 1007,24586 |
| Ankrd35     | 5,53804406 | 4,48207959 | 3,53145052 | 15,7562655 |
| Adamtsl4    | 145,394522 | 379,463711 | 77,7897598 | 156,626425 |
| Gm7972      | 12,7753366 | 19,9484311 | 9,45545387 | 22,6785082 |
| Serpib1a    | 149,888575 | 315,072381 | 77,6549985 | 193,562187 |

|             |            |            |            |            |
|-------------|------------|------------|------------|------------|
| Gm18407     | 21,9508119 | 26,1208772 | 28,2943253 | 54,9551962 |
| Zglp1       | 24,9759357 | 37,2862714 | 43,0275908 | 88,3393477 |
| Txndc2      | 7,93511645 | 7,69898154 | 7,22266604 | 17,1304729 |
| AC160962.1  | 758,675318 | 1864,45523 | 506,931762 | 1095,74555 |
| Cyp1b1      | 85,2331871 | 173,11154  | 61,1540814 | 114,046186 |
| Irgm2       | 475,383163 | 733,753749 | 522,769186 | 1040,82137 |
| Coro6       | 99,7708241 | 101,416701 | 70,4646366 | 174,143809 |
| Cdh1        | 369,334229 | 275,210424 | 29,4375802 | 72,0448426 |
| Hes1        | 390,449105 | 731,146457 | 420,600794 | 917,548507 |
| Gbp3        | 832,069066 | 1771,76929 | 884,959374 | 1679,06909 |
| Madcam1     | 27,4040871 | 81,2175332 | 10,7389974 | 30,3203753 |
| Tmem236     | 26,1254099 | 59,3440871 | 18,6441999 | 37,0519142 |
| Trem3       | 86,9549277 | 176,876886 | 45,0452479 | 99,498182  |
| Nr1h3       | 73,7560929 | 117,895606 | 60,0931774 | 164,468657 |
| Cabyr       | 15,8209305 | 28,4248294 | 17,8199946 | 38,765513  |
| Sdcbp2      | 13,408376  | 15,0121765 | 6,7878681  | 24,0018893 |
| Wnt5b       | 53,5765624 | 82,0166036 | 30,0931977 | 79,2539093 |
| Ldlr        | 2425,9418  | 4429,21996 | 1060,38806 | 2209,49328 |
| Glipr2      | 243,996349 | 541,129009 | 153,707375 | 340,711816 |
| Cidea       | 3,89463278 | 5,7103066  | 3,0179383  | 9,70866088 |
| Sult2b1     | 12,6117141 | 21,4007269 | 9,894207   | 24,06535   |
| Anxa1       | 2312,95471 | 3988,31038 | 1186,44923 | 2627,97165 |
| Cdk6        | 1710,09643 | 3968,62199 | 1175,07224 | 2456,89512 |
| C5ar2       | 294,281841 | 836,724666 | 368,733987 | 836,002421 |
| Kcne4       | 38,2925702 | 30,4827667 | 5,78877861 | 22,2161681 |
| Gm16201     | 15,3824924 | 77,5067984 | 17,8198658 | 32,9834824 |
| C030034L19R | 47,1903696 | 91,4549195 | 35,8731928 | 82,6821318 |
| Hormad2     | 30,6816338 | 39,7596412 | 18,7165425 | 40,8193765 |
| Ctrl        | 22,3914204 | 25,8223159 | 23,7667576 | 52,5056346 |
| Mall        | 14,8879268 | 15,538712  | 7,80372858 | 19,4118111 |
| Tspoap1     | 554,72594  | 453,718704 | 612,167134 | 1539,11077 |
| Nudt10      | 2,44912078 | 8,93581703 | 5,93750375 | 10,1166333 |
| 9130230N09F | 21,643504  | 32,6226464 | 27,9989445 | 67,9786111 |
| Gbp7        | 3221,61348 | 7099,1866  | 3704,33822 | 6505,27141 |
| Slc5a5      | 57,4283085 | 40,71327   | 28,2455354 | 81,0045598 |
| Slc16a12    | 149,090813 | 309,789814 | 109,403011 | 199,06664  |
| Nlrc5       | 303,677038 | 510,908737 | 278,588114 | 540,174273 |
| Tubb6       | 2555,16078 | 7259,28185 | 2820,76844 | 5632,29322 |
| Noct        | 225,210743 | 635,364275 | 245,924224 | 466,195349 |
| Wdr38       | 20,3224359 | 30,9744953 | 17,3778421 | 41,0904482 |
| Gm3052      | 18,7124111 | 17,12787   | 17,3651958 | 39,6155596 |
| Rps27rt     | 21,2218476 | 44,9959657 | 25,4631888 | 62,2542661 |
| Gm43062     | 14,1955239 | 17,5314233 | 11,1925274 | 22,3256907 |
| Gprc5a      | 27,7599644 | 32,6358617 | 10,5575844 | 23,764132  |
| Rnf225      | 83,1154033 | 108,638577 | 83,3089379 | 162,946332 |
| Gm29650     | 15,3486721 | 26,3935414 | 13,8200754 | 24,8887542 |

|             |            |            |            |            |
|-------------|------------|------------|------------|------------|
| Ankrd33b    | 48,3817595 | 98,2197807 | 29,4368642 | 56,9806719 |
| Rhou        | 46,349003  | 107,150032 | 37,8771469 | 73,0040956 |
| Oasl2       | 492,392986 | 649,418717 | 466,334919 | 941,907552 |
| Olfm4       | 767,121367 | 1588,90961 | 685,754756 | 1280,80874 |
| Plac8       | 522,419052 | 1021,63072 | 338,999285 | 747,145164 |
| Mx2         | 404,809116 | 331,377434 | 414,208012 | 878,399593 |
| Ctgf        | 156,768905 | 218,142888 | 40,4156174 | 78,7513965 |
| Slc41a2     | 12,0538154 | 23,9044075 | 12,7320011 | 28,5407562 |
| Itgb7       | 82,5512712 | 140,648169 | 53,339338  | 125,92211  |
| Rufy4       | 15,9403382 | 28,1747737 | 14,1339544 | 29,8420604 |
| Cd44        | 1293,9648  | 2908,0699  | 858,679918 | 1759,68883 |
| AW046200    | 18,0654599 | 25,4627673 | 13,9318199 | 30,6183992 |
| Mpzl3       | 42,8678693 | 106,75379  | 47,8626548 | 84,6434035 |
| Gm42732     | 26,5017337 | 23,40543   | 16,953371  | 32,7102393 |
| Slc4a11     | 11,92378   | 24,4063707 | 8,88245887 | 16,6340836 |
| Ctla2a      | 212,725719 | 428,916193 | 111,480597 | 226,136872 |
| Pou3f1      | 8,08890123 | 11,680922  | 7,76729904 | 16,9287532 |
| Myc         | 2236,87466 | 4725,1311  | 1281,90835 | 2311,07397 |
| Tgm1        | 554,940267 | 1198,83337 | 457,675391 | 880,891946 |
| Ctsw        | 13,8257349 | 30,2544938 | 13,9968202 | 28,9248717 |
| L3mbtl1     | 3,88361947 | 5,60206245 | 5,94973533 | 14,1112015 |
| Bace2       | 31,504734  | 46,7483363 | 13,3604436 | 37,9369917 |
| Il4ra       | 16328,8183 | 42707,2242 | 15932,1713 | 31384,1146 |
| 9130213A22F | 5,36742539 | 6,38989811 | 3,67155696 | 10,599448  |
| Slc1a1      | 36,7300632 | 68,3319515 | 29,2421644 | 57,5361673 |
| Adam33      | 1145,84652 | 1194,09512 | 392,599067 | 717,63705  |
| Igf2bp1     | 82,838485  | 176,459406 | 102,525322 | 191,629736 |
| Uck2        | 446,294277 | 1012,99038 | 340,759207 | 699,828631 |
| Ccr2        | 176,29267  | 312,966061 | 119,594749 | 243,743673 |
| Phyhip      | 12,0659376 | 13,4843027 | 7,63194552 | 24,7900399 |
| Thbd        | 777,391755 | 1425,08005 | 237,617546 | 419,292895 |
| Gm31597     | 38,931992  | 42,5349123 | 36,4635052 | 76,1810552 |
| Il17ra      | 4967,43011 | 10248,3574 | 4112,99877 | 7466,75599 |
| Mb21d2      | 219,797851 | 407,004309 | 271,538734 | 552,315332 |
| Gm37607     | 12,6511789 | 13,5794925 | 12,9382479 | 24,5836269 |
| Chka        | 2865,43586 | 4782,33711 | 2859,25781 | 6137,65938 |
| Tnfrsf13c   | 12,1109995 | 23,6514542 | 14,8414535 | 34,7038038 |
| Helz2       | 302,454748 | 366,272068 | 199,678245 | 411,112139 |
| Papss2      | 38,5575435 | 78,0935555 | 32,1201657 | 61,1615807 |
| Srgap1      | 116,887218 | 197,283194 | 76,7247714 | 148,802238 |
| Tmod1       | 282,406421 | 577,683836 | 309,909729 | 626,834596 |
| Stx11       | 98,0280456 | 199,553256 | 65,663889  | 130,319442 |
| Acpp        | 32,4093336 | 58,2236991 | 20,0793121 | 39,0216477 |
| 1700034H15F | 21,4021278 | 36,6418919 | 18,3397937 | 33,304562  |
| Nkd1        | 330,655758 | 137,798424 | 237,903468 | 129,749886 |
| Kcnh2       | 142,658079 | 69,6677767 | 196,989465 | 94,8081237 |

|             |            |            |            |            |
|-------------|------------|------------|------------|------------|
| Chaf1b      | 839,994181 | 497,301671 | 573,111032 | 318,071914 |
| Lmod1       | 22,5313937 | 11,4478835 | 10,6666548 | 5,68711052 |
| Ube2t       | 141,015072 | 54,6752437 | 92,1535857 | 52,5955979 |
| Srl         | 311,052023 | 134,602047 | 279,091292 | 134,726621 |
| Fnip2       | 4117,72572 | 2202,45789 | 5792,10411 | 2450,58156 |
| Exo1        | 439,782656 | 253,310783 | 231,535519 | 114,972193 |
| Khdrbs3     | 152,163839 | 82,120306  | 147,659665 | 73,160662  |
| Erc6l       | 578,962312 | 321,297023 | 443,294356 | 219,520844 |
| Tk1         | 1441,18899 | 782,2617   | 633,998223 | 339,744198 |
| Lrr1        | 69,3782748 | 39,1197075 | 30,3577105 | 15,6815996 |
| Crip3       | 8,17108137 | 3,94931822 | 9,42178781 | 6,455577   |
| Klhl38      | 172,480499 | 52,9763399 | 315,618143 | 143,690862 |
| Rad54l      | 586,807644 | 315,712308 | 398,888375 | 197,331284 |
| Brca1       | 907,604507 | 469,972449 | 606,10459  | 283,975775 |
| Slc27a6     | 737,126378 | 310,642062 | 749,498348 | 331,19801  |
| Adgrg5      | 1453,22163 | 583,304844 | 1372,17231 | 684,934232 |
| Timeless    | 1632,72564 | 820,183395 | 1122,91149 | 537,787166 |
| 2010001K21F | 37,4139092 | 16,878909  | 37,5938406 | 20,7149091 |
| Calhm2      | 302,892504 | 123,917647 | 198,419526 | 94,2886488 |
| Psrc1       | 284,513527 | 161,921427 | 208,706517 | 103,377133 |
| Ccdc159     | 17,9963542 | 5,21938333 | 9,75863995 | 6,13112268 |
| Cdkn2a      | 53,4091705 | 31,1578758 | 25,5318745 | 10,3132273 |
| Cyp2r1      | 36,5174766 | 34,033847  | 39,1602994 | 18,7861829 |
| Ccdc15      | 82,6164838 | 35,977671  | 63,6751734 | 30,3439989 |
| Wipf3       | 61,5056674 | 57,0673716 | 141,336386 | 55,7130629 |
| Cbfa2t3     | 2165,39117 | 942,484795 | 1940,6167  | 951,479328 |
| Cfap77      | 5,61580271 | 3,90660615 | 11,991343  | 5,10126138 |
| Dnali1      | 10,5577022 | 7,61867931 | 21,3090269 | 9,32375064 |
| Pask        | 536,082228 | 269,253276 | 367,85033  | 168,275348 |
| Lmcd1       | 36,1718888 | 15,5289419 | 32,2029076 | 19,3034758 |
| Gm4316      | 110,553554 | 81,5295422 | 80,0903318 | 35,1982422 |
| Troap       | 843,934767 | 490,901578 | 474,827673 | 208,759439 |
| Myb         | 121,226253 | 73,1953926 | 71,0630937 | 26,8952975 |
| St8sia4     | 831,810381 | 346,319025 | 721,444904 | 296,776676 |
| Pole        | 1543,25751 | 701,4749   | 920,884967 | 414,340028 |
| BC030867    | 293,627753 | 169,120205 | 157,157335 | 78,8000502 |
| Sec16b      | 42,5814842 | 24,3548175 | 61,3370251 | 24,6752238 |
| Gm26520     | 60,34293   | 58,6691072 | 99,3639885 | 48,4403087 |
| Nav1        | 2579,50326 | 1352,47814 | 1916,21664 | 791,359357 |
| Rab17       | 100,430031 | 46,1067419 | 126,370536 | 73,8997696 |
| B430305J03R | 41,8880288 | 35,7626962 | 74,9032805 | 26,2874003 |
| Adam5       | 6,38087669 | 3,18061809 | 14,1591305 | 6,73116034 |
| Spaca9      | 33,4251265 | 16,6783846 | 30,1599379 | 16,7197591 |
| Myzap       | 48,6640713 | 19,1428929 | 14,7715714 | 6,82059128 |
| Oip5        | 163,225041 | 95,6565204 | 112,542564 | 50,5164095 |
| Kcnc2       | 53,8937419 | 16,4851579 | 28,1971048 | 13,7615502 |



|             |            |            |            |            |
|-------------|------------|------------|------------|------------|
| Perp        | 253,469423 | 171,908498 | 312,169559 | 119,764123 |
| Bspry       | 23,076456  | 12,3722615 | 22,1919944 | 6,71066531 |
| Fzd10       | 27,4439514 | 9,23260756 | 44,7765536 | 20,5829201 |
| Clspn       | 1237,01319 | 548,017696 | 687,810605 | 291,260099 |
| E2f8        | 1594,0215  | 667,158596 | 825,384749 | 341,303541 |
| Mcm10       | 1008,71692 | 451,607013 | 551,32013  | 264,926804 |
| Dnajb13     | 160,984082 | 52,5910042 | 134,391642 | 77,4918782 |
| Ypel2       | 435,064007 | 130,802935 | 493,701087 | 214,935782 |
| Snai2       | 17,8970067 | 7,66269769 | 8,67056565 | 2,61032138 |
| 4833417C18R | 37,058822  | 17,6575332 | 27,0717312 | 15,1022538 |
| Notum       | 79,2147031 | 40,0805211 | 66,0157832 | 31,3220413 |
| Actn2       | 19,863318  | 15,9437788 | 19,4784339 | 7,24136703 |
| Wdr63       | 17,5265516 | 8,61422414 | 23,2752357 | 10,2308837 |
| 4930558J18R | 18,0602059 | 11,4843213 | 13,3941944 | 4,30148714 |
| Eps8l2      | 63,6394275 | 32,2257812 | 36,2159078 | 15,4276846 |
| Rbp4        | 11,7947582 | 5,76314064 | 11,7104942 | 4,08872253 |
| Ppp1r42     | 14,374405  | 5,39796171 | 7,43265456 | 4,15984589 |
| D330045A20f | 56,4351219 | 28,3598335 | 34,1104546 | 13,2188549 |
| Ptprr       | 16,9534993 | 7,10556629 | 21,9771288 | 10,5712828 |
| Cutal       | 16,5423417 | 7,26032884 | 10,0087103 | 4,22485956 |
| Pcdhb3      | 5,52372787 | 3,69793769 | 13,2840611 | 3,40438598 |
| Lgi2        | 207,073154 | 52,1135748 | 89,0256301 | 37,6182502 |
| Meltf       | 4,70425907 | 3,55274291 | 11,189128  | 4,07041495 |
| Fv1         | 29,9808446 | 16,5740321 | 32,5751657 | 10,6861161 |
| Prkcq       | 213,301167 | 89,0313391 | 191,884975 | 72,1788588 |
| Gm42793     | 677,322104 | 488,402471 | 950,448136 | 351,369168 |
| Fam69b      | 37,9055617 | 18,473711  | 41,5071067 | 17,760061  |
| Rtkn2       | 201,328987 | 62,845468  | 148,796248 | 61,2765635 |
| Ddit4l      | 25,5012134 | 11,3722708 | 18,5051564 | 7,66095443 |
| Stac2       | 53,0014441 | 23,9121148 | 89,736183  | 35,5099007 |
| Syt15       | 211,226346 | 71,0121294 | 161,329543 | 68,3626901 |
| Gm7666      | 98,9434785 | 61,1950667 | 87,8342951 | 36,1575566 |
| Gm12286     | 8,43974308 | 7,83659577 | 12,6805371 | 4,80341817 |
| AC027700.1  | 14,569401  | 6,88562352 | 22,2912166 | 8,07916306 |
| Syngn4      | 15,9788082 | 10,9992721 | 8,89469046 | 2,42849235 |
| Dnah5       | 12,8356426 | 4,1910505  | 15,3026523 | 5,24269832 |
| Gna14       | 7,28257782 | 2,8590252  | 6,57201969 | 2,80948146 |
| Lrrc10b     | 8,52561172 | 4,12114862 | 8,0860597  | 2,70428001 |
| F2r1l       | 20,7419742 | 9,24935565 | 16,1151535 | 5,01990069 |
| Klhdc9      | 4,9937766  | 2,73978512 | 7,3941068  | 2,24963048 |
| Fgfr4       | 46,458012  | 8,82245097 | 15,0455414 | 6,3763759  |
| Lhx6        | 61,4872534 | 39,583441  | 40,5035833 | 14,6326435 |
| Frmpd2      | 8,12177414 | 2,95595366 | 8,16830214 | 2,6197779  |
| Kcnj14      | 55,2813314 | 22,0377696 | 50,3790345 | 15,5208699 |
| Col6a6      | 32,2772708 | 10,963308  | 33,3158237 | 6,59425109 |
| Ttll6       | 6,94950266 | 0,89456632 | 6,40363599 | 3,39729226 |

|              |            |            |            |            |
|--------------|------------|------------|------------|------------|
| Baiap2l2     | 537,491123 | 229,900974 | 745,772132 | 262,210689 |
| Scn4b        | 9,76686576 | 2,53643648 | 8,82425256 | 3,54346121 |
| Tnfrsf26     | 137,814076 | 80,9694362 | 183,489279 | 41,1315449 |
| 2610035F20R  | 5,47671489 | 3,44787275 | 4,85240177 | 0,31104661 |
| Fam26e       | 13,0699368 | 5,50426003 | 6,31099427 | 1,25975264 |
| Igfbpl1      | 32,5851541 | 26,9365373 | 58,8363807 | 16,2446231 |
| 6030442K20R  | 4,77794845 | 3,64641923 | 10,8462872 | 1,73588123 |
| AF529169     | 161,302577 | 41,1915805 | 234,466894 | 66,4747485 |
| Cerkl        | 15,5171017 | 9,34227987 | 19,0371355 | 3,25132764 |
| Gm37689      | 40,7841405 | 15,1303887 | 19,5649018 | 4,47345852 |
| Gm20083      | 2,1596081  | 0,9472785  | 5,75298964 | 1,59089314 |
| Gm38399      | 147,487467 | 74,6445631 | 128,427097 | 24,4479007 |
| Gm10699      | 3,10496714 | 2,4290663  | 5,08026824 | 0,26633114 |
| Ephx4        | 3,31364659 | 0,53113531 | 3,90960921 | 1,59542082 |
| Gm42879      | 8,88494918 | 4,69856789 | 6,97591035 | 1,80187144 |
| Grp          | 12,3591436 | 6,49337664 | 7,50309246 | 1,86175197 |
| Hs3st2       | 62,537848  | 17,3306254 | 70,2249685 | 17,7360448 |
| Crabp1       | 7,66220452 | 2,05813521 | 7,24452756 | 1,93149015 |
| EPPK1        | 5,03481168 | 0,94977853 | 2,63094739 | 0,88271582 |
| Gm4739       | 20,3035409 | 10,0612416 | 14,0725622 | 2,5088679  |
| Duoxa1       | 3,96580446 | 1,06564461 | 3,72862325 | 0,57737775 |
| Blk          | 31,9164192 | 7,77768982 | 36,1799133 | 8,70991051 |
| Cd28         | 114,928327 | 28,9073606 | 139,665013 | 29,3738202 |
| Gm9816       | 30,8573883 | 6,01439931 | 28,3929794 | 5,36306483 |
| Wnt9b        | 4,6988429  | 0,26388066 | 2,41212665 | 0,93313983 |
| Gm31409      | 3,44401051 | 0,94477847 | 3,54206333 | 0,31104661 |
| Vill         | 322,840007 | 79,601341  | 292,22003  | 32,0481412 |
| B3gnt4       | 4,03427748 | 0,63068566 | 2,05604301 | 0,3311405  |
| 2610507I01Ri | 30,9258091 | 2,27680377 | 27,9560585 | 2,1621612  |
| Hs3st6       | 7,55352894 | 0,5345093  | 1,42484169 | 0          |
| Kcnv1        | 2,33307305 | 0,26388066 | 2,08121915 | 0          |
| Spata9       | 2,19790203 | 0          | 1,06599925 | 0          |
| Gm15601      | 0,2402103  | 0,85110214 | 0          | 1,46009357 |
| Gm16325      | 0,48042059 | 4,27785699 | 0          | 0,3311405  |
| Prss50       | 0,2402103  | 1,32615129 | 0,67603602 | 3,86298031 |
| Cxcl3        | 8,97394458 | 64,1073125 | 6,24586512 | 24,8739903 |
| Ccl22        | 8,76754969 | 57,8559651 | 24,4234617 | 36,6713563 |
| Gm37194      | 1,74453376 | 9,13848961 | 6,2548261  | 11,2233287 |
| Dcpp2        | 45,4164427 | 191,970443 | 71,7193733 | 101,130766 |
| Tnfsf14      | 27,5429034 | 131,601897 | 28,8392002 | 66,8565733 |
| Mmp13        | 14,5508395 | 65,2556083 | 22,4189707 | 34,9018164 |
| 1700023F06R  | 1,26159547 | 2,90661547 | 1,79260109 | 6,24814236 |
| Selp         | 26,1893947 | 124,284327 | 13,4151658 | 41,4203864 |
| Gpr15        | 6,93117424 | 22,3146953 | 3,28138021 | 8,62266704 |
| 2210008F06R  | 2,28298064 | 6,19222558 | 3,57968459 | 9,85148409 |
| 3110082J24R  | 0,78793796 | 2,37548016 | 2,24705758 | 5,8730661  |

|             |            |            |            |            |
|-------------|------------|------------|------------|------------|
| Stfa2       | 1072,93971 | 2792,30788 | 479,29907  | 1415,59177 |
| Rep15       | 1,49756038 | 7,2159907  | 1,66883857 | 3,94886758 |
| B230303A05F | 29,5384131 | 81,8288142 | 15,1456948 | 56,2019444 |
| BC048644    | 2,02052028 | 10,0582999 | 2,08121915 | 4,11039841 |
| Kcna7       | 6,4698721  | 25,1961887 | 11,4076064 | 21,904545  |
| Ch25h       | 108,626712 | 672,992707 | 246,37358  | 377,593256 |
| Gm21887     | 14,1417479 | 40,2372523 | 7,85607032 | 27,6911334 |
| Ngp         | 3050,23015 | 8100,67366 | 1515,9129  | 4886,60986 |
| Lcn2        | 1650,05846 | 4983,01356 | 861,310428 | 2609,88878 |
| Gm11707     | 11,0825226 | 38,2451322 | 6,08721176 | 15,1952272 |
| Vaultrc5    | 5,39107455 | 10,3535862 | 9,25905049 | 23,1357226 |
| P2ry2       | 289,579395 | 1203,39329 | 307,141606 | 469,854638 |
| Ppbp        | 25,067178  | 92,2011285 | 40,9962168 | 77,2528207 |
| Bcl2a1a     | 115,05107  | 370,870999 | 124,969448 | 236,512362 |
| Rab33a      | 6,41185066 | 18,7092403 | 10,1326015 | 20,0037786 |
| Klrb1c      | 23,0138606 | 59,9516304 | 20,0406356 | 50,5832343 |
| Msr1        | 2591,16591 | 6435,34263 | 2040,3187  | 4199,1407  |
| Rpl28-ps1   | 36,4584842 | 92,390779  | 51,6965894 | 112,040025 |
| Gm5879      | 3,85578197 | 12,2796157 | 7,70492869 | 17,3203722 |
| Cnga2       | 4,33251406 | 14,8997698 | 9,91046619 | 17,04519   |
| Ltf         | 2814,52776 | 7356,5105  | 1638,1959  | 4572,87408 |
| Ffar2       | 12,9658401 | 35,4252564 | 10,083091  | 26,3150127 |
| Rtn4rl2     | 2,34777001 | 5,87269109 | 0,33939741 | 2,14206731 |
| Hc          | 1,4882796  | 6,11362989 | 2,33914348 | 3,50445428 |
| AC238811.2  | 10,0995317 | 30,0725415 | 8,38393703 | 15,5445086 |
| Dmkn        | 3,79775568 | 13,0936818 | 8,32819592 | 13,4477622 |
| Lor         | 2,76960743 | 7,13100818 | 2,58589916 | 4,80656068 |
| Gm10073     | 74,5920205 | 194,569289 | 98,6131573 | 212,135331 |
| Il1rn       | 239,779829 | 722,219488 | 344,747979 | 527,273557 |
| Palm3       | 2,95179143 | 7,49999344 | 3,21171166 | 7,39580414 |
| Serpina3n   | 26,5399561 | 95,6861844 | 78,2358548 | 123,719905 |
| Ackr1       | 146,032614 | 433,987475 | 111,44797  | 255,297455 |
| Hrct1       | 15,7969528 | 36,7184151 | 15,429943  | 33,0797802 |
| Fam83f      | 2,56148486 | 6,18353177 | 4,85813288 | 9,54655577 |
| Tulp1       | 3,37167288 | 7,43715929 | 1,81225965 | 5,20251054 |
| Dmp1        | 4,80365387 | 11,6616739 | 1,73906295 | 5,23935148 |
| Rpl10-ps3   | 22,465824  | 55,6546614 | 39,3003728 | 60,6202609 |
| Gm14963     | 2,79917745 | 5,51263407 | 2,05328421 | 6,57199122 |
| Pdgfa       | 343,095712 | 931,692657 | 366,148715 | 632,213621 |
| Gm32899     | 6,86615657 | 15,1684526 | 9,32893256 | 12,0144551 |
| Gm11808     | 7,66533613 | 22,0490346 | 13,9012062 | 22,0507064 |
| Bcl2l1      | 4372,89148 | 11937,3807 | 4088,40134 | 7574,66677 |
| Gm12696     | 5,98464925 | 12,3500717 | 6,8610648  | 15,553964  |
| Gm26902     | 12,3069428 | 40,2176132 | 16,9551186 | 21,0038937 |
| Gm5781      | 44,9050001 | 100,87307  | 51,1675873 | 96,9135395 |
| Ms4a6c      | 2966,91649 | 6423,18915 | 2365,04465 | 4909,11758 |

|            |            |            |            |            |
|------------|------------|------------|------------|------------|
| Gm45855    | 11,0648465 | 27,4701015 | 18,0943429 | 21,6738664 |
| C3         | 1066,03247 | 1953,53608 | 607,130355 | 1419,99521 |
| Fank1      | 1,67666981 | 3,79618173 | 3,57615644 | 7,45706984 |
| Gm8210     | 8,70780058 | 20,0687337 | 11,4836907 | 23,263185  |
| Gm43703    | 17,358736  | 38,2340236 | 22,8835766 | 42,8075746 |
| Plaur      | 1704,05932 | 4705,48944 | 2534,59661 | 3549,54579 |
| B3gnt7     | 527,847991 | 1452,51684 | 546,470303 | 776,516743 |
| Olfm1      | 174,530135 | 478,853717 | 143,594479 | 222,021735 |
| AC127578.1 | 40,3282538 | 80,9177782 | 54,261376  | 90,7388811 |
| Ccnd1      | 5646,67402 | 12955,1716 | 4579,50966 | 9110,99495 |
| Pparg      | 66,7270706 | 159,172016 | 78,4040093 | 148,344189 |
| AL845457.1 | 26,7979573 | 66,5918581 | 30,4319985 | 44,7981783 |
| H2-Ab1     | 464,348874 | 1150,92097 | 533,930416 | 875,708755 |
| Fam241a    | 67,4218248 | 158,011092 | 58,7430554 | 114,775304 |
| Entpd3     | 25,733904  | 68,2041764 | 13,5190122 | 16,2221589 |
| Dnajb3     | 8,00069585 | 17,1559338 | 5,94676301 | 11,7465333 |
| Cxcr2      | 732,281479 | 1637,61567 | 673,865484 | 1369,40809 |
| Klc3       | 6,07028474 | 12,3490759 | 6,95646532 | 13,282278  |
| Smim3      | 522,099027 | 1300,75235 | 569,763647 | 717,616265 |
| Ccdc73     | 19,1345152 | 31,7550701 | 19,8483115 | 57,492822  |
| Cd177      | 745,780102 | 1442,96991 | 408,609815 | 896,81521  |
| Piwil2     | 41,5406227 | 106,082099 | 37,4107524 | 57,8389608 |
| H2-M2      | 10,7258032 | 24,4561919 | 16,1897838 | 21,3813381 |
| Hcar2      | 621,850821 | 1423,67462 | 612,922904 | 836,9098   |
| Fgr        | 583,904663 | 1149,07697 | 386,093525 | 762,957404 |
| Gm10051    | 11,9891263 | 21,2573927 | 13,4244658 | 32,6487757 |
| Gm15501    | 47,1870904 | 99,5893201 | 63,2507951 | 109,262471 |
| Hivep2     | 1209,23937 | 3085,34538 | 997,906878 | 1707,81896 |
| Gm4754     | 17,7803548 | 38,1312924 | 18,5485859 | 37,0385344 |
| Slc35e4    | 227,503266 | 510,179516 | 186,14588  | 307,864014 |
| Nfil3      | 1359,16771 | 3360,64302 | 1009,8742  | 1585,49854 |
| Hmcn2      | 5,92158755 | 11,0434883 | 2,70668936 | 6,86530674 |
| Ass1       | 43,0925641 | 82,156309  | 27,2608567 | 53,6308246 |
| H2-Aa      | 533,852686 | 1330,22901 | 591,642126 | 977,550822 |
| Gpt2       | 672,043181 | 1544,27324 | 774,616989 | 1301,58257 |
| Fhl3       | 1065,2092  | 2277,71821 | 1030,33652 | 1960,05676 |
| Mras       | 1070,83663 | 2386,83785 | 1718,24418 | 3159,24794 |
| Rpph1      | 77,5715916 | 133,14825  | 117,631427 | 217,956175 |
| Rpl9-ps6   | 74,5568721 | 140,52098  | 94,7577539 | 154,770827 |
| Rbm47      | 1243,2801  | 2791,91386 | 1112,01867 | 1840,07397 |
| H2-Eb1     | 431,520679 | 942,985591 | 447,150684 | 771,381084 |
| Mt1        | 6577,96165 | 13263,8709 | 7222,49847 | 9856,77931 |
| Plin5      | 5,25198673 | 8,46358768 | 6,28263227 | 10,0894468 |
| Stk40      | 1951,05191 | 4366,53488 | 2163,07571 | 3620,41024 |
| CT010498.2 | 331,190768 | 707,34522  | 231,048412 | 402,991264 |
| Gm2000     | 51,5343968 | 85,8402584 | 44,8314453 | 98,3564956 |

|              |            |            |            |            |
|--------------|------------|------------|------------|------------|
| Fgf2         | 10,9437634 | 33,4654413 | 17,440853  | 18,705019  |
| Gm10288      | 23,8560557 | 44,4012788 | 29,1548314 | 41,8137583 |
| Cdkn2b       | 19,568156  | 40,7974199 | 18,5799202 | 28,7544748 |
| Spint2       | 61,1799554 | 112,452245 | 18,554317  | 30,7734439 |
| Trmt61a      | 429,978953 | 870,344457 | 480,840649 | 737,335503 |
| Gm11539      | 42,9084053 | 77,8161881 | 46,827445  | 93,2158358 |
| Pglyrp1      | 524,27519  | 1020,96941 | 321,488378 | 680,875183 |
| Glipr1       | 492,951002 | 1031,58095 | 759,72066  | 1185,98826 |
| Tma16        | 259,783179 | 559,885589 | 246,836327 | 430,219483 |
| Fbp1         | 109,673246 | 238,408009 | 101,488359 | 174,848836 |
| Lipc         | 14,0808704 | 29,762584  | 12,3760022 | 19,8075932 |
| Ptpn7        | 1111,97366 | 2133,34392 | 1064,8612  | 1461,53668 |
| Gm15536      | 39,1776184 | 69,9610524 | 51,1692629 | 96,9746502 |
| Rps18-ps3    | 25,869256  | 49,4656626 | 29,5865722 | 42,5899251 |
| Rpl36a-ps2   | 22,5098815 | 40,1201652 | 30,1936887 | 50,694853  |
| Rpl39-ps     | 57,5056912 | 95,8032264 | 62,2471222 | 110,571907 |
| Rrs1         | 937,945767 | 2012,96498 | 871,327452 | 1557,8756  |
| Emilin2      | 2083,30707 | 4158,80871 | 1412,46808 | 2597,32802 |
| Lgals3       | 844,244652 | 1699,66691 | 988,471294 | 1558,16653 |
| Bex4         | 11,2338329 | 21,3524167 | 10,6504396 | 17,5811991 |
| 2510016D11F  | 255,004622 | 114,756566 | 268,612568 | 125,564429 |
| 2610028D06F  | 15,8131491 | 3,33232642 | 2,99297567 | 0          |
| 4930518I15Ri | 9,09922576 | 2,85390329 | 7,55654585 | 3,58956185 |
| 4933433G15F  | 12,467767  | 1,65036607 | 11,0848953 | 12,7754192 |
| 6430511E19R  | 10,7162941 | 3,26929437 | 9,99371987 | 8,69004352 |
| 9430034N14F  | 55,6845612 | 19,6320269 | 23,6080038 | 18,209986  |
| 9930120I10Ri | 74,9379835 | 29,614682  | 39,1728577 | 28,417459  |
| AC108802.1   | 221,484204 | 82,0456248 | 81,2666656 | 63,6359822 |
| AC112142.1   | 2,98756766 | 1,06227062 | 4,85558761 | 1,91139626 |
| AC124426.1   | 109,95196  | 44,2866161 | 104,976996 | 41,4071474 |
| AC124556.1   | 48,4721075 | 25,5019835 | 16,5395805 | 20,1710265 |
| AC129597.1   | 58,3991452 | 22,9730471 | 30,9919249 | 18,7369322 |
| AC131586.4   | 27,8390275 | 10,3483425 | 9,19413486 | 5,86124788 |
| AC139845.1   | 5,56028928 | 1,78663261 | 2,48808214 | 1,56016188 |
| AC151971.2   | 26,57183   | 13,5303887 | 15,2005094 | 12,6381389 |
| AC154640.4   | 67,0797598 | 30,8413727 | 34,2584795 | 23,6871022 |
| AC157931.1   | 16,5167936 | 5,08061676 | 10,8211111 | 9,49454116 |
| Accs3        | 15,0470756 | 3,11953187 | 11,5639721 | 8,78676499 |
| Adamts16     | 777,840437 | 376,506928 | 864,41033  | 435,162153 |
| Adgra2       | 1244,66417 | 667,889023 | 1042,16596 | 562,991314 |
| Adh1         | 77,3239947 | 31,32035   | 38,5723734 | 28,2421107 |
| Adra1a       | 10,7708553 | 4,60207178 | 5,21145773 | 3,91931718 |
| Afap1l2      | 230,455182 | 90,7464019 | 138,170778 | 109,608968 |
| Ago4         | 1048,64587 | 546,784857 | 1185,73772 | 691,376467 |
| Agtr1a       | 4,65747439 | 2,05388726 | 1,90710434 | 0          |
| Ahnak2       | 166,408943 | 55,3521096 | 199,575075 | 141,785736 |

|              |            |            |            |            |
|--------------|------------|------------|------------|------------|
| AL645745.1   | 10,9197856 | 5,57078793 | 8,26051682 | 3,69908667 |
| Alas2        | 107,876803 | 38,1274514 | 47,0056845 | 37,929898  |
| Aldoa        | 48,4683041 | 21,4702286 | 25,924017  | 14,7122157 |
| Als2cl       | 827,732166 | 421,733847 | 575,030766 | 350,5543   |
| Aph1c        | 401,108831 | 190,188876 | 342,604104 | 186,146439 |
| Arntl        | 528,602677 | 227,443243 | 505,513154 | 259,619516 |
| Arpp21       | 57,9666225 | 22,3820651 | 43,1623809 | 32,8452041 |
| Asic3        | 19,0926469 | 6,50282255 | 10,1519178 | 7,48091061 |
| Asxl3        | 14,3512125 | 5,49751205 | 9,63466391 | 7,47736805 |
| Atad2        | 2369,48444 | 1187,14254 | 1670,3569  | 871,362105 |
| Atad5        | 911,556571 | 468,823005 | 629,329732 | 360,252803 |
| Atp8b5       | 14,5756121 | 7,59855724 | 22,4682237 | 10,7483809 |
| Avil         | 29,0998225 | 12,839369  | 41,627583  | 36,8557009 |
| B230323A14F  | 1,06644218 | 0,31409281 | 3,63003688 | 0,82736298 |
| B3gnt8       | 147,844049 | 57,8758757 | 107,62126  | 71,1052586 |
| C130021I20Ri | 7,02357766 | 3,22320831 | 5,92137334 | 3,06497091 |
| C130071C03F  | 28,0676579 | 15,0644564 | 30,8535583 | 14,9878302 |
| C1ql3        | 3,24751032 | 1,6402441  | 17,1298176 | 5,16410907 |
| Cacna1e      | 130,875076 | 59,0279978 | 72,5396226 | 35,1166858 |
| Capns2       | 99,7050832 | 43,4158652 | 46,1442286 | 33,754116  |
| Catsperd     | 6,40452585 | 2,37635412 | 4,80799411 | 2,92136799 |
| Cbln4        | 0,70710472 | 0,31659284 | 3,62672226 | 0,9934215  |
| Cbx2         | 153,082971 | 64,7420994 | 94,9873209 | 56,5945174 |
| Cdc7         | 466,309963 | 250,905622 | 236,818256 | 108,728238 |
| Cdhr1        | 29,4136796 | 15,0058702 | 15,1913789 | 13,1843756 |
| Cenpu        | 221,300006 | 100,7248   | 131,816246 | 77,4150505 |
| Chrd         | 36,817317  | 18,5816261 | 24,4831613 | 13,9547963 |
| Cited4       | 18,3269638 | 5,38883556 | 10,1546766 | 9,03279792 |
| Cmah         | 634,197239 | 285,943219 | 389,384251 | 240,718441 |
| Cmya5        | 96,7567422 | 24,6417298 | 93,1928181 | 51,4497333 |
| Col25a1      | 67,2846742 | 31,1222315 | 47,7067603 | 29,554234  |
| Cpeb1        | 24,3496071 | 11,8643464 | 22,8196392 | 9,37890666 |
| Crybg3       | 1279,22775 | 703,340828 | 1249,11912 | 720,397824 |
| CT009718.2   | 56,9826603 | 23,9587229 | 39,8391506 | 20,9485409 |
| CT025660.2   | 61,864986  | 17,4173905 | 32,7368917 | 17,0802521 |
| Ctnna3       | 24,1378106 | 11,2373545 | 41,0857164 | 21,7603666 |
| D030028A08f  | 782,770288 | 416,409948 | 894,428464 | 440,516177 |
| D030055H07I  | 4,09230377 | 1,16519496 | 1,42505521 | 0,5421188  |
| Ddc          | 13,6739631 | 9,11761544 | 15,9380664 | 6,61336095 |
| Ddx60        | 1000,50124 | 527,937628 | 804,168591 | 614,696808 |
| E030022I16Ri | 96,9879815 | 45,9960671 | 69,7553899 | 63,0589669 |
| Egr3         | 1060,9474  | 626,233097 | 2562,85252 | 1422,74037 |
| Enpp3        | 13,5632745 | 7,68659399 | 9,56711358 | 6,04662057 |
| Esco2        | 387,629598 | 184,25728  | 243,115223 | 134,745074 |
| Extl1        | 7,50651595 | 3,38753863 | 2,87473075 | 0,26633114 |
| Eya1         | 41,3216589 | 18,4654496 | 12,9701381 | 9,71754201 |



|         |            |            |            |            |
|---------|------------|------------|------------|------------|
| Fam167a | 468,827752 | 115,965616 | 515,737088 | 270,368493 |
| Fam214a | 990,821447 | 400,766626 | 965,340183 | 510,805362 |
| Fam228a | 2,30947608 | 0,53113531 | 2,46566479 | 2,32960489 |
| Fbxl21  | 31,5708606 | 15,2254127 | 16,1435155 | 12,868597  |
| Fendrr  | 40,1130828 | 7,59898958 | 10,246549  | 4,1056739  |
| Fgf10   | 1,42773561 | 0          | 2,03086686 | 0,27578766 |
| Fosb    | 33185,7303 | 15990,9033 | 24076,0197 | 16343,4801 |
| Foxb1   | 0,79045566 | 0,26725465 | 15,5140901 | 14,4271694 |
| Foxd2os | 18,94563   | 5,35024959 | 1,74203527 | 3,40674878 |
| Gdpd2   | 154,194351 | 54,4475962 | 71,5969948 | 56,643581  |
| Gm10425 | 11,8119777 | 3,75184359 | 23,3906731 | 22,9293021 |
| Gm11398 | 14,2596994 | 7,21631046 | 8,19382059 | 4,56150428 |
| Gm1141  | 7,30482788 | 1,15594695 | 2,85286922 | 0,92861214 |
| Gm11870 | 17,5443377 | 6,80334336 | 4,83592906 | 1,89268755 |
| Gm12454 | 34,8437053 | 15,0949788 | 17,6287665 | 27,0300193 |
| Gm15816 | 90,8753429 | 40,9232175 | 76,166649  | 51,3802198 |
| Gm15880 | 103,472893 | 50,0007335 | 126,018272 | 58,5341443 |
| Gm16892 | 4,41586015 | 0,84522813 | 6,01995971 | 2,99563387 |
| Gm17024 | 359,538328 | 192,152062 | 298,584683 | 238,656168 |
| Gm17971 | 77,8041827 | 48,4925005 | 51,7306152 | 54,3417755 |
| Gm17999 | 34,0222283 | 13,2150657 | 9,90417924 | 6,64882422 |
| Gm20274 | 25,164431  | 10,6612416 | 18,8244729 | 12,8804238 |
| Gm21781 | 83,884243  | 48,9209806 | 62,5430745 | 46,5768231 |
| Gm22589 | 14,1461645 | 5,17385147 | 12,1168862 | 6,10099688 |
| Gm22748 | 16,7101768 | 5,48239003 | 4,1511896  | 3,66953627 |
| Gm25749 | 2,05881421 | 0,52776132 | 2,31375381 | 0,62209322 |
| Gm25835 | 177,016015 | 96,0441743 | 59,640244  | 45,371606  |
| Gm25994 | 643,184946 | 291,645302 | 213,692847 | 192,772447 |
| Gm26514 | 23,9077233 | 10,3184961 | 10,4755555 | 10,398736  |
| Gm27694 | 231,979265 | 125,964853 | 97,9491631 | 84,056837  |
| Gm2788  | 23,6464241 | 9,08796698 | 18,6246701 | 13,0594814 |
| Gm29260 | 3,07768168 | 0,84860212 | 1,35483084 | 0          |
| Gm35154 | 53,8932893 | 25,4518172 | 51,2151652 | 26,3817451 |
| Gm36401 | 16,2841838 | 3,90867383 | 9,21909748 | 6,63916338 |
| Gm36527 | 58,1303778 | 25,5381913 | 42,8850522 | 25,5841131 |
| Gm36529 | 9,53034396 | 3,64479317 | 9,76152752 | 5,06343531 |
| Gm37019 | 30,0441207 | 17,288624  | 9,36514858 | 13,0311119 |
| Gm37168 | 19,5644487 | 6,37957824 | 35,8332067 | 23,2901769 |
| Gm37274 | 26,9798649 | 10,5127946 | 13,2936186 | 13,6478762 |
| Gm37303 | 15,9077417 | 4,85257834 | 8,91413549 | 3,31238902 |
| Gm37309 | 37,494519  | 19,6029326 | 16,2194994 | 14,1058941 |
| Gm37310 | 68,6110153 | 30,5330456 | 51,9120798 | 11,3850413 |
| Gm37352 | 436,714899 | 202,000365 | 165,503498 | 129,547763 |
| Gm37893 | 62,2894651 | 28,3818508 | 23,7469703 | 28,7062522 |
| Gm38190 | 68,4882344 | 40,7152919 | 23,2164735 | 22,1048848 |
| Gm38220 | 49,4575884 | 20,5280306 | 7,87671175 | 7,29671987 |

|          |            |            |            |            |
|----------|------------|------------|------------|------------|
| Gm38372  | 91,1919744 | 39,9082174 | 60,7964481 | 17,7319032 |
| Gm38375  | 18,39963   | 7,7258516  | 10,3579511 | 5,25313887 |
| Gm42047  | 1031,51603 | 389,102679 | 480,645872 | 281,002143 |
| Gm42664  | 88,9645128 | 33,6697444 | 26,2421371 | 12,856582  |
| Gm42748  | 83,5400265 | 43,9870102 | 31,6719885 | 21,5801185 |
| Gm42979  | 78,4916357 | 38,8463351 | 32,6841637 | 32,221316  |
| Gm43039  | 18,9233278 | 7,39969099 | 5,99159771 | 3,85450782 |
| Gm43080  | 33,1652034 | 12,9919512 | 9,62948862 | 5,7412825  |
| Gm43088  | 27,972342  | 10,1732599 | 11,2306481 | 7,44051961 |
| Gm43197  | 8,61611135 | 3,69413136 | 6,45420181 | 3,29604311 |
| Gm43272  | 79,4061218 | 31,6578931 | 39,8672427 | 23,8677515 |
| Gm43351  | 34,1419646 | 12,4893213 | 30,3839056 | 20,3112826 |
| Gm43362  | 37,1920419 | 14,9082657 | 26,1050029 | 19,6088138 |
| Gm43389  | 27,6242413 | 10,5110467 | 9,15847467 | 7,03038873 |
| Gm43437  | 8,87645842 | 2,90248937 | 9,5557361  | 6,40947636 |
| Gm43481  | 68,8471438 | 33,621478  | 42,4423642 | 22,8000641 |
| Gm43679  | 28,3641668 | 11,5679975 | 20,066154  | 12,3654926 |
| Gm43693  | 12,2534953 | 4,44143521 | 4,728724   | 3,48179437 |
| Gm43759  | 99,4348129 | 53,4573853 | 46,0228542 | 56,0648244 |
| Gm43858  | 65,1670729 | 30,014275  | 27,8860571 | 15,2705072 |
| Gm43912  | 32,3018477 | 16,078019  | 16,0639031 | 16,7987559 |
| Gm43951  | 16,3626851 | 7,66889147 | 11,0346718 | 6,7804035  |
| Gm44033  | 13,6683138 | 4,27123087 | 9,89534703 | 5,31834937 |
| Gm44053  | 14,4021423 | 6,60574688 | 14,4113237 | 11,1254253 |
| Gm44067  | 55,7118077 | 27,1882816 | 46,6097766 | 53,1446652 |
| Gm44164  | 66,441685  | 33,800889  | 41,255402  | 26,4497022 |
| Gm44423  | 366,304651 | 131,145911 | 176,54424  | 106,511761 |
| Gm44574  | 72,0935543 | 35,7102668 | 76,2813501 | 42,983695  |
| Gm45309  | 17,3293281 | 7,26707681 | 14,8205184 | 5,60555411 |
| Gm45540  | 72,9250985 | 10,5171645 | 25,7279072 | 11,5989878 |
| Gm45743  | 30,2092661 | 13,6009209 | 17,9170423 | 11,7796349 |
| Gm45838  | 38,9798431 | 16,5139324 | 10,3165598 | 6,58873937 |
| Gm45906  | 3,72699326 | 0,31659284 | 1,64069011 | 1,60034965 |
| Gm5857   | 11,515088  | 3,44199873 | 13,7187302 | 7,0682148  |
| Gm5977   | 3,98843044 | 0          | 4,20846941 | 2,10228068 |
| Gm8817   | 43,3229367 | 23,299217  | 23,8606758 | 26,7434189 |
| Gm8835   | 14,2189399 | 4,42261944 | 8,68571318 | 6,1157608  |
| Gpr157   | 1417,02686 | 740,060853 | 1759,74188 | 861,748776 |
| Gpr160   | 1643,62898 | 758,716898 | 1490,80508 | 827,240904 |
| Gpr182   | 63,5702027 | 30,3469764 | 42,7596866 | 24,1782066 |
| Gpr63    | 6,35863148 | 1,15932094 | 5,93508725 | 1,46955009 |
| Gramd1b  | 3987,67021 | 1939,30248 | 5190,80852 | 3061,93236 |
| Grb14    | 56,4653685 | 21,7569337 | 30,706105  | 22,2268269 |
| Hectd2os | 7,59998504 | 2,21484359 | 18,8285569 | 9,50065835 |
| Hepacam2 | 5,60786884 | 1,96271096 | 5,20071614 | 4,48271072 |
| Hey2     | 55,5098865 | 23,6152508 | 32,1848678 | 29,5300339 |

|           |            |            |            |            |
|-----------|------------|------------|------------|------------|
| Hist1h2ac | 65,9362927 | 21,2830004 | 22,1808257 | 16,9102413 |
| Hist1h2bg | 142,01267  | 69,6583426 | 52,1938268 | 44,7952101 |
| Hist1h2bh | 34,0863035 | 14,0339019 | 14,167198  | 16,2378994 |
| Hkdc1     | 7,84634935 | 1,52862596 | 4,13747569 | 3,81806802 |
| Hlf       | 169,101391 | 75,3211228 | 73,2861104 | 61,407961  |
| Igdcc3    | 22,6505208 | 9,23391387 | 11,977122  | 9,78903754 |
| Igf1os    | 16,0864703 | 4,05918843 | 16,2157293 | 11,6986765 |
| Ighj4     | 49,5765582 | 18,3462188 | 43,9094183 | 21,1171729 |
| Il7r      | 144,522313 | 54,2822495 | 165,658601 | 81,1476065 |
| Insc      | 18,0261477 | 2,37722808 | 9,58078347 | 9,41770926 |
| Insrr     | 7,68987075 | 1,84771883 | 0,72362952 | 1,33165571 |
| Ipcef1    | 508,539564 | 245,931388 | 436,090904 | 239,603387 |
| Irf4      | 683,452648 | 257,902362 | 571,205706 | 302,600571 |
| Kcnh1     | 5,82386825 | 1,43244961 | 1,39966554 | 0,60692816 |
| Kif24     | 276,610531 | 141,66842  | 191,466131 | 102,040551 |
| Klhl30    | 16,3891757 | 4,27091111 | 7,31560135 | 5,24033551 |
| Klhl33    | 127,668377 | 47,7142098 | 41,9854989 | 37,1961    |
| Kmo       | 120,309278 | 52,2663453 | 85,0943197 | 56,3224961 |
| Knl1      | 704,518268 | 378,069968 | 423,713151 | 201,358453 |
| Lgr6      | 14,489891  | 4,64565781 | 5,64888568 | 4,06666697 |
| Lmo7      | 75,4812468 | 31,2754577 | 51,9800165 | 33,4806878 |
| Lpar5     | 664,551265 | 319,395223 | 709,261982 | 331,039031 |
| Lrrn1     | 50,0294253 | 19,5045439 | 93,4097658 | 71,5783802 |
| Lrrn3     | 68,9812002 | 32,7299752 | 43,7960991 | 27,2853345 |
| Mab21l2   | 1,08617454 | 0          | 8,01639115 | 5,24033551 |
| Malat1    | 15919,6863 | 8011,8064  | 6203,4372  | 5874,01206 |
| Mamdc2    | 132,988642 | 62,1266238 | 294,159814 | 155,667736 |
| Map2k6    | 546,99372  | 207,015175 | 619,491096 | 340,775732 |
| Mbd4      | 478,49675  | 216,348161 | 315,730368 | 165,300919 |
| Mir6935   | 72,8690088 | 37,3482707 | 41,9093346 | 29,5818517 |
| Mir6942   | 11,0690967 | 4,89409669 | 14,2797072 | 13,9439546 |
| Mir7060   | 46,8582084 | 15,9123824 | 34,4848323 | 29,6474344 |
| Mmp28     | 168,135781 | 69,8337375 | 149,544721 | 76,9942898 |
| Mmrn1     | 197,209136 | 95,9013941 | 80,929683  | 49,4087462 |
| Mob3b     | 241,163357 | 125,328187 | 183,994044 | 100,126096 |
| Ms4a14    | 563,470309 | 207,91754  | 288,582176 | 147,853124 |
| Mybl1     | 83,9923464 | 42,1199307 | 55,5318055 | 27,334584  |
| Mybpc1    | 51,8886655 | 13,8171791 | 31,4247287 | 15,1014793 |
| Naaladl1  | 25,1260416 | 9,02556517 | 12,3617812 | 5,65165475 |
| Nat8f2    | 4,40485654 | 0,89206629 | 0,91706059 | 0,31104661 |
| Nkx6-1    | 14,318563  | 3,90660615 | 10,6506532 | 8,92898164 |
| Nlrc4     | 541,879351 | 260,253513 | 385,632116 | 268,555212 |
| Nup210l   | 44,9954093 | 15,2752686 | 22,2166147 | 19,462675  |
| Nxpe5     | 206,270685 | 76,0288515 | 125,381133 | 54,8050428 |
| Olfml2a   | 264,190482 | 114,493906 | 142,159778 | 94,5959195 |
| Otof      | 5,67517106 | 0,90044033 | 2,14537011 | 2,01166889 |

|           |            |            |            |            |
|-----------|------------|------------|------------|------------|
| Pax3      | 0,99913511 | 0,31659284 | 14,4451185 | 10,4371375 |
| Pcdh18    | 140,637182 | 59,7388731 | 92,8107733 | 76,0713444 |
| Phf21b    | 144,007627 | 66,3980544 | 104,626768 | 91,7984305 |
| Pik3c2b   | 670,948378 | 317,358861 | 684,425225 | 346,679767 |
| Pkd1l1    | 12,0662565 | 1,59003195 | 8,05519647 | 5,62190002 |
| Pla2r1    | 28,4574027 | 11,0596062 | 13,1157621 | 16,9244309 |
| Plscr4    | 19,3809936 | 8,24654518 | 13,5789221 | 6,05391861 |
| Plxnd1    | 6326,03541 | 3158,90919 | 4340,08654 | 2408,78117 |
| Ptgdr     | 12,6846657 | 4,1910505  | 1,13622362 | 2,33788056 |
| Ptger3    | 59,5189584 | 22,6595178 | 79,0871723 | 42,7104358 |
| Ptprb     | 1754,48128 | 714,01575  | 1296,26624 | 613,720691 |
| Rad54b    | 443,552358 | 222,076955 | 234,463406 | 113,485319 |
| Ranbp3l   | 167,086071 | 90,8691886 | 222,501561 | 107,039476 |
| Rbm11     | 3,95036966 | 0,84860212 | 3,26193518 | 2,0412193  |
| Ret       | 119,332078 | 57,5940853 | 100,51669  | 55,1986288 |
| Rho       | 7,93455473 | 2,74315911 | 7,3972079  | 5,0766398  |
| Rpgrip1   | 17,2206003 | 5,72055042 | 9,85008528 | 9,121048   |
| Rsg1      | 6,10550408 | 1,79338059 | 3,8934788  | 0,58683427 |
| Samd11    | 74,4039881 | 26,9783803 | 61,5666018 | 24,6401241 |
| Sbspon    | 9,50753217 | 3,81217771 | 12,8751646 | 8,45049134 |
| Scel      | 32,6284173 | 15,1141143 | 32,56175   | 13,583468  |
| Scn7a     | 6,49636269 | 1,69545631 | 5,79506555 | 2,51832442 |
| Serpinb1c | 21,3466479 | 6,98724155 | 17,9626463 | 14,5010405 |
| Serpind1  | 61,8449544 | 26,3146673 | 19,5686875 | 26,312764  |
| Skida1    | 23,8914463 | 6,87637552 | 17,7078231 | 14,016062  |
| Slc26a11  | 715,563065 | 329,807893 | 464,505814 | 329,093357 |
| Slit2     | 125,738137 | 51,6407722 | 40,5640002 | 42,6383532 |
| Sned1     | 389,143296 | 211,502709 | 165,562771 | 118,166785 |
| Snhg14    | 13,3909233 | 6,63746303 | 10,4251184 | 9,44077142 |
| Sp7       | 7,81034482 | 1,21203312 | 4,15989304 | 1,89130237 |
| Spata25   | 16,4162329 | 3,12115794 | 13,8000745 | 7,4225906  |
| Spic      | 95,2719511 | 36,2248748 | 77,9131123 | 74,3297803 |
| Spon2     | 34,6757135 | 15,8619724 | 12,1086051 | 6,33264446 |
| Tbc1d4    | 2441,16796 | 1256,56111 | 2411,50135 | 1327,02173 |
| Tbx18     | 125,955679 | 69,3897855 | 55,2799152 | 38,1792842 |
| Tbx6      | 186,099944 | 99,5309528 | 157,636581 | 130,522294 |
| Tcf7      | 228,319299 | 114,034372 | 125,598086 | 72,6729067 |
| Tchh      | 13,5273222 | 6,34286204 | 8,6021172  | 8,77552216 |
| Tead4     | 31,9417299 | 12,522024  | 15,5368498 | 16,1918213 |
| Tfap2b    | 25,4174393 | 15,3140797 | 26,6402919 | 19,6903766 |
| Ticrr     | 823,984985 | 385,363535 | 446,600535 | 230,562898 |
| Tll1      | 27,8841173 | 15,6051502 | 7,71065981 | 6,60272358 |
| Trerf1    | 179,669216 | 96,0970887 | 166,525823 | 88,5261023 |
| Trim63    | 92,6392088 | 36,4819709 | 137,12591  | 90,5851183 |
| Trp53cor1 | 95,3105168 | 46,2344532 | 119,519452 | 90,3594642 |
| Tspan10   | 27,7402272 | 7,48856517 | 35,5692937 | 17,9395057 |

|         |            |            |            |            |
|---------|------------|------------|------------|------------|
| Wnt9a   | 30,8222161 | 11,5325876 | 11,5480552 | 10,5789756 |
| Wscd2   | 9,61794028 | 3,79542963 | 5,60715208 | 2,96037492 |
| Xkrx    | 32,6406154 | 16,5983929 | 32,1407177 | 15,8214771 |
| Zan     | 6,7236134  | 0,90044033 | 2,31693965 | 1,61551471 |
| Zfhx2os | 9,21046638 | 5,06092703 | 7,82584766 | 4,33181726 |
| Zfhx4   | 39,5555126 | 12,3878251 | 15,3686796 | 15,8555552 |
| Zfp469  | 9,76803171 | 3,69663139 | 12,1570967 | 5,39339495 |
| Zfp521  | 127,540117 | 68,8589885 | 106,018174 | 52,446893  |
| Zfp536  | 15,8597813 | 7,06503448 | 11,1074414 | 8,46093189 |
| Zfp820  | 49,0258646 | 25,8591861 | 53,828745  | 23,8785932 |
| Zgrf1   | 522,274368 | 242,876248 | 295,127121 | 167,64788  |
| Zic5    | 49,1014528 | 22,8546049 | 27,7732937 | 17,756897  |
| Zscan30 | 26,0877634 | 12,6704802 | 16,4955152 | 15,9501268 |

## Supplementary table 6: Outputs from the cluster-based gene analysis.

| CLUSTER 1                                                                  |       |       |          |                 |            |          |                 |           |          |
|----------------------------------------------------------------------------|-------|-------|----------|-----------------|------------|----------|-----------------|-----------|----------|
| Term                                                                       | Count | %     | PValue   | Genes           | List Total | Pop Hits | Fold Enrichment | Benjamini | Pvalue   |
| GO:0006954~inflammatory response                                           | 32    | 8,840 | 6,37E-15 | CCL12, CXCL9,   | 290        | 344      | 5,800160385     |           | 5,89E-12 |
| GO:0002376~immune system process                                           | 30    | 8,287 | 4,06E-12 | HP, NLRC5, IL4I | 290        | 383      | 4,88394706      |           | 2,51E-09 |
| GO:0006955~immune response                                                 | 25    | 6,906 | 1,31E-11 | CCL12, CXCL9,   | 290        | 272      | 5,730856998     |           | 6,07E-09 |
| GO:0008284~positive regulation of cell proliferation                       | 22    | 6,077 | 1,82E-04 | CSF3, PDGFA, I  | 290        | 542      | 2,530881792     |           | 1,35E-02 |
| GO:0070374~positive regulation of ERK1 and ERK2 cascade                    | 20    | 5,525 | 1,88E-10 | CCL12, CCL22,   | 290        | 188      | 6,633162142     |           | 6,96E-08 |
| GO:0071346~cellular response to interferon-gamma                           | 19    | 5,249 | 1,63E-17 | GBP6, GBP5, C   | 290        | 68       | 17,42180527     |           | 3,01E-14 |
| GO:0010628~positive regulation of gene expression                          | 18    | 4,972 | 2,49E-04 | VDR, PLAUR, P   | 290        | 399      | 2,812859736     |           | 1,62E-02 |
| GO:0045087~innate immune response                                          | 18    | 4,972 | 2,53E-04 | ZBP1, ANXA1, N  | 290        | 400      | 2,805827586     |           | 1,62E-02 |
| GO:0006935~chemotaxis                                                      | 16    | 4,420 | 6,53E-10 | CCL12, CXCL9,   | 290        | 118      | 8,45447107      |           | 2,01E-07 |
| GO:0071356~cellular response to tumor necrosis factor                      | 15    | 4,144 | 2,41E-09 | CCL12, CCL22,   | 290        | 110      | 8,502507837     |           | 4,96E-07 |
| GO:0019221~cytokine-mediated signaling pathway                             | 14    | 3,867 | 6,46E-07 | CCL12, IL1RN, C | 290        | 146      | 5,978932452     |           | 7,97E-05 |
| GO:0030593~neutrophil chemotaxis                                           | 13    | 3,591 | 8,66E-10 | CCL12, CCL22,   | 290        | 69       | 11,74742629     |           | 2,13E-07 |
| GO:0045766~positive regulation of angiogenesis                             | 13    | 3,591 | 5,50E-07 | C5AR1, THBS1,   | 290        | 121      | 6,698945569     |           | 7,26E-05 |
| GO:0042127~regulation of cell proliferation                                | 13    | 3,591 | 3,04E-04 | CXCL9, ANXA1,   | 290        | 227      | 3,570803585     |           | 1,76E-02 |
| GO:0070098~chemokine-mediated signaling pathway                            | 12    | 3,315 | 9,22E-10 | CXCL9, CXCL11   | 290        | 55       | 13,60401254     |           | 2,13E-07 |
| GO:0071347~cellular response to interleukin-1                              | 12    | 3,315 | 5,67E-08 | IL6, CCL12, CCL | 290        | 80       | 9,352758621     |           | 8,06E-06 |
| GO:0032496~response to lipopolysaccharide                                  | 12    | 3,315 | 3,39E-04 | THBD, CXCL9, C  | 290        | 197      | 3,798074567     |           | 1,85E-02 |
| GO:0050729~positive regulation of inflammatory response                    | 11    | 3,039 | 5,64E-08 | CCL12, CCL8, F  | 290        | 63       | 10,88680898     |           | 8,06E-06 |
| GO:0035458~cellular response to interferon-beta                            | 10    | 2,762 | 1,35E-08 | GBP6, TGTP2, T  | 290        | 41       | 15,20773759     |           | 2,49E-06 |
| GO:0060326~cell chemotaxis                                                 | 10    | 2,762 | 4,18E-06 | CXCL9, CXCL11   | 290        | 78       | 7,993810787     |           | 4,54E-04 |
| GO:0051897~positive regulation of protein kinase B signaling               | 10    | 2,762 | 2,51E-05 | IL6, CSF3, F10, | 290        | 97       | 6,428012798     |           | 2,45E-03 |
| GO:0042832~defense response to protozoan                                   | 9     | 2,486 | 1,67E-08 | GBP6, BATF2, IL | 290        | 30       | 18,70551724     |           | 2,80E-06 |
| GO:0050728~negative regulation of inflammatory response                    | 9     | 2,486 | 7,57E-05 | MIR147, CTLA2,  | 290        | 87       | 6,450178359     |           | 6,37E-03 |
| GO:0050830~defense response to Gram-positive bacterium                     | 9     | 2,486 | 1,22E-04 | GBP6, FGR, GB   | 290        | 93       | 6,03403782      |           | 9,77E-03 |
| GO:0002548~monocyte chemotaxis                                             | 8     | 2,210 | 2,94E-06 | LGALS3, CCL12   | 290        | 40       | 12,47034483     |           | 3,40E-04 |
| GO:0007200~phospholipase C-activating G-protein coupled rec. sign. pathway | 8     | 2,210 | 4,64E-05 | C5AR2, P2RY2,   | 290        | 60       | 8,313563218     |           | 4,29E-03 |
| GO:0043434~response to peptide hormone                                     | 8     | 2,210 | 1,64E-04 | GJA1, ANXA1, S  | 290        | 73       | 6,833065659     |           | 1,26E-02 |



|                                                                                 |   |       |          |                  |     |    |             |          |
|---------------------------------------------------------------------------------|---|-------|----------|------------------|-----|----|-------------|----------|
| GO:0048661~positive regulation of smooth muscle cell proliferation              | 8 | 2,210 | 2,91E-04 | IL6, CCL5, MYC   | 290 | 80 | 6,235172414 | 1,73E-02 |
| GO:0009615~response to virus                                                    | 8 | 2,210 | 3,93E-04 | TGTP2, CDK6, T   | 290 | 84 | 5,938259442 | 2,07E-02 |
| GO:0042060~wound healing                                                        | 8 | 2,210 | 7,75E-04 | IL6, CDH3, WNT   | 290 | 94 | 5,306529714 | 3,50E-02 |
| GO:0048247~lymphocyte chemotaxis                                                | 7 | 1,934 | 1,22E-05 | CCL12, CCL8, C   | 290 | 33 | 13,2261233  | 1,25E-03 |
| GO:0043406~positive regulation of MAP kinase activity                           | 7 | 1,934 | 2,15E-04 | PDGFC, KIT, NC   | 290 | 54 | 8,082630907 | 1,47E-02 |
| GO:0070301~cellular response to hydrogen peroxide                               | 7 | 1,934 | 2,90E-04 | IL6, TRPC6, AN   | 290 | 57 | 7,65722928  | 1,73E-02 |
| GO:0034341~response to interferon-gamma                                         | 6 | 1,657 | 5,03E-05 | TGTP2, H2-EB1    | 290 | 26 | 14,38885942 | 4,43E-03 |
| GO:0045740~positive regulation of DNA replication                               | 6 | 1,657 | 5,90E-04 | IL6, PDGFC, PD   | 290 | 43 | 8,700240577 | 2,95E-02 |
| GO:0045600~positive regulation of fat cell differentiation                      | 6 | 1,657 | 0,00108  | WNT5B, NOCT,     | 290 | 49 | 7,634904996 | 4,76E-02 |
| GO:1901741~positive regulation of myoblast fusion                               | 5 | 1,381 | 2,05E-04 | EHD1, CXCL9, C   | 290 | 19 | 16,40834846 | 1,46E-02 |
| GO:0010575~positive regulation of vascular endothelial growth factor production | 5 | 1,381 | 5,28E-04 | C3, ADORA2B, C   | 290 | 24 | 12,98994253 | 2,71E-02 |
| GO:0001895~retina homeostasis                                                   | 5 | 1,381 | 6,20E-04 | CDH3, TULP1, S   | 290 | 25 | 12,47034483 | 3,02E-02 |
| GO:0044406~adhesion of symbiont to host                                         | 4 | 1,105 | 3,16E-04 | GBP6, GBP7, GI   | 290 | 9  | 27,71187739 | 1,77E-02 |
| GO:2000660~negative regulation of interleukin-1-mediated signaling pathway      | 3 | 0,829 | 7,56E-04 | IL6, IL1RN, IL1R | 290 | 3  | 62,35172414 | 3,49E-02 |
| GO:0033031~positive regulation of neutrophil apoptotic process                  | 3 | 0,829 | 7,56E-04 | HCAR2, ANXA1,    | 290 | 3  | 62,35172414 | 3,49E-02 |

## CLUSTER 2

| Term                                                       | Count | %     | PValue   | Genes             | List Total | Pop Hits | Fold Enrichment | Benjamini |
|------------------------------------------------------------|-------|-------|----------|-------------------|------------|----------|-----------------|-----------|
| GO:0051607~defense response to virus                       | 13    | 10,32 | 4,81E-12 | GBP2B, RSAD2,     | 77         | 167      | 18,28027063     | 2,11E-09  |
| GO:0002376~immune system process                           | 11    | 8,73  | 4,45E-06 | GBP2B, RSAD2,     | 77         | 383      | 6,744498322     | 6,49E-04  |
| GO:0045087~innate immune response                          | 9     | 7,143 | 2,71E-04 | RSAD2, MX2, M     | 77         | 400      | 5,283701299     | 1,98E-02  |
| GO:0009615~response to virus                               | 8     | 6,349 | 6,11E-08 | RSAD2, MX2, M     | 77         | 84       | 22,36487322     | 1,34E-05  |
| GO:0035458~cellular response to interferon-beta            | 5     | 3,968 | 2,59E-05 | GBP2B, IGTP, IF   | 77         | 41       | 28,63794742     | 2,27E-03  |
| GO:0035457~cellular response to interferon-alpha           | 4     | 3,175 | 1,53E-05 | IFIT3B, IFIT1, IF | 77         | 12       | 78,27705628     | 1,67E-03  |
| GO:0045071~negative regulation of viral genome replication | 4     | 3,175 | 3,24E-04 | RSAD2, MX2, IS    | 77         | 32       | 29,3538961      | 2,03E-02  |

**Supplementary table 7:****Specific gene lists used to build the predicted protein networks in STRING.**

| <i>Cerebrum only</i> | <i>Cerebellum only</i> | SHARED GENES  |
|----------------------|------------------------|---------------|
|                      |                        | Nipal1        |
| Gm16325              | Foxd3                  | Serpina3g     |
| Prss50               | Spr-ps1                | Bmp8a         |
| Cxcl3                | Mpz                    | ligp1         |
| Gm37194              | Rnase2a                | Tgtp2         |
| Dcpp2                | Gng13                  | Prss16        |
| Tnfsf14              | Ifit3b                 | Ccl17         |
| 1700023F06Rik        | Gm10143                | Plet1         |
| Selp                 | Kcna1                  | Tgtp1         |
| 2210008F06Rik        | Csf3                   | Mirt2         |
| 3110082J24Rik        | Mc5r                   | Slc28a3       |
| Stfa2                | Fcnaos                 | Serpina3h     |
| Rep15                | Ifit1                  | Jaml          |
| B230303A05Rik        | Tomt                   | Gzma          |
| BC048644             | Trim69                 | Serpina3e-ps  |
| Kcna7                | Vwc2                   | Steap4        |
| Gm21887              | Cdh3                   | Ms4a4b        |
| Ngp                  | 1700016G22Rik          | Gm5416        |
| Lcn2                 | Ly6i                   | Serpina3i     |
| Gm11707              | Gm8463                 | Apol10b       |
| Vaultrc5             | B9d1os                 | Serpina3f     |
| Rab33a               | Ifnlr1                 | Gbp4          |
| Klrb1c               | Ifit3                  | Cxcl11        |
| Msr1                 | Eomes                  | Gbp10         |
| Rpl28-ps1            | Htr2a                  | Il1r2         |
| Cnga2                | Clec4e                 | Zbtb16        |
| Ltf                  | Nt5e                   | Il2rb         |
| Ffar2                | Chil5                  | Cxcl9         |
| Hc                   | Ifit1bl1               | Plet1os       |
| Lor                  | Esyt3                  | Nrg4          |
| Gm10073              | A930030B08Rik          | Gm807         |
| Serpina3n            | Gm26448                | 2010005H15Rik |
| Hrct1                | A330023F24Rik          | Rab44         |
| Fam83f               | Ms4a8a                 | Cpm           |
| Rpl10-ps3            | Ifi44                  | Gm9733        |
| Gm32899              | Gm42928                | E230001N04Rik |
| Gm11808              | Mx1                    | Upp1          |
| Gm12696              | Gm11620                | Klf9          |
| Gm26902              | Ccl8                   | Vcam1         |
| Gm45855              | Chdh                   | Orm1          |
| Gm43703              | Cmpk2                  | Rnase1        |
| AC127578.1           | Oasl1                  | Areg          |

|            |               |           |
|------------|---------------|-----------|
| AL845457.1 | Mgp           | Sell      |
| Dnajb3     | Arl9          | Kcna5     |
| Klc3       | Gjc3          | Jdp2      |
| Smim3      | 1700014D04Rik | Nlrp12    |
| Ccdc73     | Gjc2          | Gm10603   |
| Cd177      | Hhip12        | Pla1a     |
| Piwil2     | Gm4759        | Il2ra     |
| Hcar2      | Cyp4f18       | Retnlg    |
| Gm10051    | Rsad2         | Arc       |
| Rpph1      | Plin4         | Stra6     |
| Rpl9-ps6   | Usp18         | Gm10524   |
| Mt1        | Cnksr1        | Gm12250   |
| Gm2000     | Tcap          | Hif3a     |
| Fgf2       | Gm8430        | Mrgpra2b  |
| Gm11539    | Hspa11        | Fpr2      |
| Lipc       | Gm44777       | Gm16194   |
| Rps18-ps3  | Ifit1b12      | Cd3d      |
| Rpl36a-ps2 | Mir17hg       | Fkbp5     |
| Bex4       | Shisa2        | Gbp2      |
| Rps16-ps2  | Gm24958       | Mrap      |
| Crybb1     | AL645522.1    | Trbc2     |
| Ptger4     | Snord37       | Map3k6    |
| Cd209a     | 1700109H08Rik | Lbx1      |
| Gm19680    | Ifit2         | Gm26473   |
| Scimp      | Sapcd1        | Il6       |
| Gm26619    | Gbp8          | Gm15675   |
| Rps10-ps1  | Ucp1          | Oas3      |
| Rps28      | Rpl7a-ps7     | Ccl5      |
| Shisa8     | Gm16287       | Capn11    |
| Gm5134     | Xdh           | Hdc       |
| Bcl3       | Gm26797       | Rdh12     |
| Rgcc       | Ifi204        | Hs3st3b1  |
| Llph       | Gm29264       | Serpinb10 |
| Gm45629    | Snord14e      | Gm43181   |
| Gm27494    | Ppef2         | Slfn1     |
| Oaf        | Cd209b        | Gbp2b     |
| Smkr-ps    | CT009713.7    | Il1f9     |
| Rmrp       | Nox4          | Mefv      |
| AL732506.1 | Cldn19        | Creb5     |
| Scand1     | Vgf           | Vdr       |
| Gm4149     | 4933406C10Rik | Atp1a4    |
| Gm6807     | Klf4          | Gm43302   |
| Il1r1      | Ankrd35       | Ddit4     |
| Epb41l4aos | Gm7972        | Prss23    |
| Slc39a4    | Gm18407       | Gm20109   |
| Pstpip1    | Zglp1         | Gm26586   |

|               |               |               |
|---------------|---------------|---------------|
| Rpl31-ps8     | Txndc2        | Ifi205        |
| Tlr7          | Irgm2         | Gm45774       |
| n-R5-8s1      | Coro6         | Fam107a       |
| Cryba4        | Cdh1          | Ttc39c        |
| Casp4         | Cabyr         | I830127L07Rik |
| Cd40          | Sdcbp2        | S100a7a       |
| Ecscr         | Sult2b1       | Prss12        |
| Gm9843        | Anxa1         | Cd300lf       |
| Rpl10a-ps1    | Kcne4         | Gbp5          |
| Gm17455       | Hormad2       | Trim30b       |
| E430024P14Rik | Ctrl          | Ly6g          |
| Sec61g        | Mall          | Adam8         |
| Ccno          | Tspoap1       | Gda           |
| 1500009C09Rik | 9130230N09Rik | Galnt15       |
| Crip1         | Slc5a5        | Dok2          |
| Gm38079       | Nlrc5         | Ccl12         |
| Prrt1         | Gm3052        | Cx3cl1        |
| Eif4ebp1      | Gm43062       | Arg2          |
| Gm26881       | Gprc5a        | Gm28592       |
| Dcxr          | Rnf225        | Mmp8          |
| Mcoln2        | Gm29650       | Cd55          |
| 3010003L21Rik | Oasl2         | Gbp6          |
| Ninj1         | Mx2           | Ramp3         |
| Polr2l        | Ctgf          | Il15ra        |
| Zfp335os      | Itgb7         | Clec4d        |
| Il2rg         | AW046200      | Arhgef37      |
| Cxcl16        | Gm42732       | Acod1         |
| Lrrc51        | Pou3f1        | Gpr141        |
| Pik3ip1       | L3mbtl1       | Chrm3         |
| Sla           | 9130213A22Rik | Wfdc21        |
| Timm8a1       | Slc1a1        | Aqp9          |
| Chad          | Adam33        | Mir147        |
| Endog         | Phyhip        | Socs2         |
| Id1           | Thbd          | Stfa2l1       |
| S100a4        | Gm31597       | Syde2         |
| Macrod1       | Gm37607       | Ocstamp       |
| Gm14586       | Helz2         | Tarm1         |
| Wdr74         | 1700034H15Rik | Abtb2         |
| Lck           | Gimap4        | Slc16a14      |
| Cxcl14        | Il18bp        | Pdzd3         |
| Wdr89         | Proser2       | Tmem252       |
| Fam60a        | Slfn5         | F10           |
| St3gal1       | Oas1b         | Runx3         |
| Havcr2        | Gm27390       | Prok2         |
| Arhgap15      | AC129931.1    | Hspa1b        |
| Mdfic         | Strip2        | Gm38150       |

|               |               |               |
|---------------|---------------|---------------|
| Gm42418       | Klf5          | Gm5483        |
| Hcst          | Adgrg3        | Sh3pxd2b      |
| Tnfrsf12a     | Slc5a3        | Gm14964       |
| Gmppb         | Gm26737       | Scn2b         |
| Phb           | AC154636.3    | Slc39a14      |
| Sugct         | Nhs           | 1700047M11Rik |
| Lrrc8c        | Adgrg6        | Vcan          |
| Prr7          | Gfpt2         | Gm23935       |
| Tmem158       | Otub2         | Prnd          |
| Polr1d        | Tbx15         | Il12rb1       |
| 1500009L16Rik | Adm           | Camp          |
| Ebi3          | Rnf223        | Cldn1         |
| Trir          | Doc2g         | Nos2          |
| Ncf1          | Slc45a3       | Ltb4r1        |
| Samsn1        | Fam19a3       | Lefty1        |
| Crlf2         | Ccdc141       | Per2          |
| Slc22a15      | Shroom2       | Adora2b       |
| Tmem130       | Olf56         | Pdgfc         |
| Gm11478       | Gm11175       | Ly6c2         |
| Tes           | AC124577.2    | Slc28a2       |
| Lrrc3         | lkbke         | Dhrs9         |
| AC113060.1    | Gt(ROSA)26Sor | Slc10a6       |
| Asns          | Pnma2         | Gm9899        |
| Gm5874        | Gm31024       | Mcomp1        |
| Gm10110       | Tmem121b      | Tacstd2       |
| Rps10-ps2     | Itih2         | Sema6b        |
| Galnt7        | Zfp708        | Cdc42ep2      |
| Tmem65        | Gm9856        | Cdr2          |
| Mrto4         | Cd200         | Trem1         |
| Cdc34         | Cpeb2         | Pawr          |
| Nol12         | Gm16973       | Asprv1        |
| Cdh13         | Runx2         | 3930402G23Rik |
| Eef1akmt4     | Lifr          | Hp            |
| Emc6          | Snai1         | Gja1          |
| Gm9794        | Mir7115       | Map2k3os      |
| Mocs3         | Oas1a         | Klra2         |
| Eif1b         | C430049B03Rik | AA467197      |
| Gm21987       | Errfi1        | Egfr          |
| Hivep3        | Dnah2         | Cish          |
| 2310043P16Rik | Ppp1r3b       | G0s2          |
| Slco3a1       | Irgm1         | Timp1         |
| Ifitm10       | Zfp948        | Ehd1          |
| Tpm3-rs7      | Rtp4          | Igfbp3        |
| Denr          | Dgka          | Met           |
| Rpl13a        | Zfp40         | Tbx21         |
| Tmem120a      | Mlxip         | Emp1          |

|               |               |               |
|---------------|---------------|---------------|
| Pycr2         | Sik1          | Atp8b4        |
| Bop1          | Inpp5j        | Mt2           |
| Rps2          | D330050G23Rik | Snord55       |
| Nr2f6         | Mal           | Adrb1         |
| Nip7          | Zmynd15       | Isg15         |
| Rpl18a        | Samd9l        | Far2          |
| Pctp          | Fas           | Gm43802       |
| B3galt5       | Col27a1       | C1qtnf9       |
| Tpt1-ps3      | Dmpk          | Igtp          |
| Prdx5         | Rrad          | Zbp1          |
| Eif6          | Casp12        | 6030468B19Rik |
| Itpkb         | Clec12a       | Syt6          |
| Ube2v2        | F3            | Tgm2          |
| R74862        | Gm28177       | Meox1         |
| Cd3eap        | Foxred2       | Ascl2         |
| Med21         | Sqle          | Gpat3         |
| Rps29         | Cp            | Socs1         |
| Marcksl1      | Synpo         | Chil1         |
| Rps10         | Cdc42ep3      | Plbd1         |
| Psemb10       | Lama4         | C5ar1         |
| Prnp          | Ankrd23       | S100a6        |
| Elp5          | Celf5         | Ldhd          |
| Fth1          | D930016D06Rik | Batf2         |
| Pik3r5        | Col7a1        | Napsa         |
| Spred1        | Stat1         | Efna2         |
| Grin1         | Tal1          | Ifi47         |
| 1300002E11Rik | Eif2s3y       | Prn           |
| Hmga1         | AC163667.1    | Bbs12         |
| Metrn1        | Nedd9         | Erich3        |
| Sac3d1        | Rbm12b1       | Trpc6         |
| Gnl1          | Stat2         | Cfap69        |
| Eif3f         | Pla2g3        | Irf7          |
| Fut4          | Nr6a1         | Kcnn4         |
| Cox5b         | Homer2        | A530076I17Rik |
| Fdx1l         | Ubp1          | Gm31718       |
| Spred2        | Gm17435       | Rasd1         |
| Bend3         | Gm28038       | Rhov          |
| Use1          | Simc1         | Rnd3          |
| B4galt6       | Bach2os       | Afap111       |
| Rps5          | Fam129c       | Runx1         |
| Eef1b2        | Taf1d         | Thbs1         |
| Lyar          | Aoc2          | Fabp4         |
| Trnau1ap      | Bcl6b         | S100a10       |
| Gm38843       | Pmel          | Srgn          |
| Rps9          | Plekhh1       | Mmp19         |
| Gm5239        | Pnir          | Kit           |

|           |               |               |
|-----------|---------------|---------------|
| Atf6      | Irf1          | Il18rap       |
| Pvt1      | Gm28035       | Sult1a1       |
| ApoE      | Gm28496       | Mlph          |
| Rpl23     | Prr18         | Hs3st3a1      |
| Uba52     | Arid5a        | Ctla2b        |
| Pfn1      | Parp14        | Adamtsl4      |
| Ntmt1     | Pvr           | Serpib1a      |
| Spryd4    | Ifih1         | AC160962.1    |
| BC031181  | Relt          | Cyp1b1        |
| Gm17084   | Foxc1         | Hes1          |
| Nr2c2ap   | Al606181      | Gbp3          |
| Taf10     | 2810403A07Rik | Madcam1       |
| Pus1      | Mlxipl        | Tmem236       |
| Rps7      | Pabpn1        | Trem3         |
| Slc12a7   | Sybu          | Nr1h3         |
| Igsf8     | Col15a1       | Wnt5b         |
| Nxt1      | Gm15446       | Ldlr          |
| Nufip1    | Tob1          | Glipr2        |
| Eid2      | Socs3         | Cidea         |
| Fam120aos | Plk2          | Cdk6          |
| Nek6      | Gcc1          | C5ar2         |
| Cmklr1    | Myo19         | Gm16201       |
| Myo1e     | Zfp202        | C030034L19Rik |
| Bag1      | Pde12         | Nudt10        |
| Gemin7    | Paxbp1        | Gbp7          |
| Orai1     | Crebzf        | Slc16a12      |
| Eif2b3    | Lrif1         | Tubb6         |
| Hspa8     | Insig1        | Noct          |
| Tysnd1    | Bcl2          | Wdr38         |
| Dubr      | Nckap5l       | Rps27rt       |
| Polr2h    | Zcchc7        | Ankrd33b      |
| Chmp4b    | E2f3          | Rhou          |
| Higd1a    | Zbtb48        | Olfm4         |
| Tomm5     | Fbxl7         | Plac8         |
| Mrps6     | Gm20521       | Slc41a2       |
| Rpl19     | Ddx58         | Rufy4         |
| Gtpbp6    | Fgfr1         | Cd44          |
| Gemin4    | Arl4a         | Mpzl3         |
| Ppp1r11   | Mag           | Slc4a11       |
| Timm23    | Dnajb9        | Ctla2a        |
| Ctnnbip1  | Pde1b         | Myc           |
| H13       | Irf9          | Tgm1          |
| Jagn1     | Sema4a        | Ctsw          |
| Ado       | Trmt10a       | Bace2         |
| Gm6472    | Grk4          | Il4ra         |
| Lypla2    | Slc25a25      | Igf2bp1       |



|               |               |               |
|---------------|---------------|---------------|
| Flot1         | Il13ra1       | Uck2          |
| Ctdnep1       | Gm20708       | Ccr2          |
| Lpcat2        | Taf13         | Il17ra        |
| Eif3g         | Col11a2       | Mb21d2        |
| Psmc5         | Dnajb1        | Chka          |
| Dnajc2        | Rbm26         | Tnfrsf13c     |
| Inafm1        | Gfap          | Papss2        |
| Ube2s         | Gm42417       | Srgap1        |
| Rpl5          | Fubp1         | Tmod1         |
| Gm20458       | Mtrf11        | Stx11         |
| D430040D24Rik | Rccd1         | Acpp          |
| Fbxl14        | Dcun1d3       | AC168059.2    |
| Kctd11        | Zfp276        | Pglyrp1       |
| Cnn2          | Rassf1        | Gstm6         |
| Eif3b         | Mafk          | Cd74          |
| Dda1          | Agap2         | Cxcr2         |
| Parl          | Akap8l        | Nabp1         |
| Hnrnpab       | Lrrc8a        | CT010498.1    |
| Dnajb2        | Rnf19b        | Bcl2l1        |
| Slc25a10      | Cyp4f13       | Hivep2        |
| Psmd7         | B3galnt2      | Ly6a          |
| Rcl1          | Parp3         | Fam241a       |
| Rpl10a        | Chordc1       | Fam78b        |
| Cmtm8         | Paqr8         | Bst1          |
| Rras          | Parp10        | Phlda1        |
| E130309D02Rik | Trit1         | Cebpb         |
| Sarnp         | Luc7l         | Isg20         |
| Id2           | Hk2           | Ccnd1         |
| Gm20509       | Ccnyl1        | Ciita         |
| Magoh         | Rabggtb       | Rcan1         |
| Kif3b         | Susd1         | P2ry2         |
| Zpr1          | Hs6st1        | Pparg         |
| Dxo           | Csrnp2        | Acap1         |
| Mrpl20        | Tap1          | Mras          |
| Hvcn1         | Ccnl2         | 1700001P01Rik |
| Hpcal1        | Ppig          | Rrs1          |
| Sod2          | Gsdmd         | Ifitm3        |
| Ppat          | C330018D20Rik | H2-Aa         |
| Sephs2        | Cry2          | Gadd45a       |
| Dbnnd2        | Hspa2         | Osmr          |
| Tsg101        | Rcc1          | Timp3         |
| Bloc1s4       | Gramd1a       | Fhl3          |
| Tle3          | 1810011H11Rik | Bcl2a1a       |
| Ucp2          | Nae1          | Rnf169        |
| Rbm8a         | Taf1a         | Nop58         |
| Sys1          | Rbm38         | EiI2          |

|               |               |               |
|---------------|---------------|---------------|
| Arpc2         | Cdyl          | Hunk          |
| Fra10ac1      | Rhbdf1        | Hbegf         |
| Ddx49         | Papd7         | Gm42595       |
| Ralb          | Tmem63a       | Grhl1         |
| Gm6969        | Smad7         | 1810032O08Rik |
| Gm20427       | Tnip2         | Lmna          |
| Ssbp4         | Sept7         | Tma16         |
| Med8          | Zfp623        | Nfe2          |
| Tm2d1         | Thoc1         | Polr1b        |
| Pdf           | 0610010F05Rik | Hcar1         |
| Rbpms         | Fam133b       | Cables1       |
| Slc39a7       | Akap8         | Fbp1          |
| Gfod2         | Sugp2         | Tmem52        |
| Utp23         | Tmem39a       | Arhgap26      |
| Mrpl50        | Tbkbp1        | Emilin2       |
| Map2k2        | Slc25a22      | Tsr1          |
| Rcc1l         | Gm44250       | Pdgfa         |
| Adprhl2       | Tardbp        | Man2a1        |
| Csnk2b        | Parp12        | Cdc42bpg      |
| Rtn4          | Sirt7         | Gtpbp4        |
| Chst7         | Med26         | S100a11       |
| Slc7a6        | Prpf40b       | Traf1         |
| 0610037L13Rik | Unc45a        | Snora65       |
| Ogfr          | BC017643      | Gpt2          |
| Plekhj1       | Kansl3        | Ston2         |
| Fam207a       | Dvl1          | Stk40         |
| Taf12         | BC024978      | H2-Eb1        |
| Snx3          | Mcl1          | Olfm1         |
| Ssu72         | Ing5          | CT010498.2    |
| 4833439L19Rik | Oxsr1         | Nfil3         |
| Me1           | Rab18         | Peg13         |
| Ptges2        | Ppp1r18       | Slc30a1       |
| Rbm42         | 9430015G10Rik | 37681         |
| Rabepk        | Uckl1         | BC049352      |
| Cbfb          | Bag3          | Rbm47         |
| Pdxk          | Ggnbp2        | Ptpn12        |
| Snta1         | Sltm          | Mir5107       |
| 1700052K11Rik | Ppp1r12c      | H2-Ab1        |
| Med10         | Klc2          | Fgr           |
| Rpl7          | Pgrmc1        | Atp1b1        |
| Exosc4        | Lgals8        | Klf13         |
| Nop9          | Cstf3         | Pnp2          |
| Sept9         | Ints13        | Rgs9          |
| Mtmr11        | Srfbp1        | Col14a1       |
| Ak1           | Fchsd1        | Spata5l1      |
| Nt5c3         | Ppp4r2        | E030030I06Rik |

|            |         |            |
|------------|---------|------------|
| Slc9a3r1   | Dnajc18 | Ass1       |
| Mrpl3      | Snx14   | AC115037.1 |
| Rsl1d1     | Rnaseh1 | Gm5905     |
| Zfp213     | Morf4l2 | Cfap74     |
| Tex30      | Bms1    | Dusp16     |
| Cct2       | Rcn2    | P2ry14     |
| Tprn       | Rnf34   | Slc35e4    |
| Pitpnb     | Gpsm1   | Phospho1   |
| Fbxo4      | Tial1   | Rxrg       |
| Larp7      | Zfp865  | Pag1       |
| Lsm1       | Ahsa2   | Snhg15     |
| Dus1l      | Srsf2   | Gprc5b     |
| Eif4a3     | Msl1    | Riox1      |
| Plpp2      | Srsf7   | Nolc1      |
| Pald1      | Sfswap  | Sbno2      |
| Npc2       | Ssb     | Cd300lb    |
| Ski        | Ergic2  | P2ry1      |
| Smn1       | Dhx34   | Ppp1r3d    |
| Wdr55      | Tbk1    | Ppan       |
| Zfp566     | Pdcd7   | Sgms1      |
| Phc2       | Dcaf6   | Garem2     |
| Eapp       | Srpr    | Peg10      |
| Vamp3      | Mia3    | Cebpd      |
| Tmem70     | Mta2    | Eif1a      |
| Abt1       | Cables2 | Nab1       |
| Ybx3       | Rbm6    | Marveld1   |
| Ube2e1     | Tor1b   | Apoo       |
| Crls1      | Sf3b2   | Snhg17     |
| Ldha       | Pigt    | Ugcg       |
| Faap100    | Raver1  | Pdp1       |
| Mindy1     | Rnpepl1 | Gadd45g    |
| Map4       | Lrpap1  | Vav3       |
| Lrrc59     | Cog7    | Sema7a     |
| Fem1a      | Sumo3   | B3gnt7     |
| Cdkn2aipnl | Vac14   | Tmem2      |
| Ears2      | Snd1    | Nop2       |
| Timm29     | Uqcrc2  | Gm15501    |
| Zadh2      | Cap1    | Ccdc86     |
| Srprb      | Crat    | Mrm3       |
| Mrps10     | Gusb    | Polr3d     |
| Rer1       | Pi4kb   | Bmf        |
| Nsun2      | Exoc7   | Mphosph10  |
| Prdx6      | Mpv17   | Lrp12      |
| Tymp       | Dis3l2  | Mgst1      |
| Tm9sf3     | Retreg2 | Trmt61b    |
| Rae1       | Tkfc    | Itsn1      |

|               |         |               |
|---------------|---------|---------------|
| Slc39a1       | Zfp385a | Tcf7l2        |
| Dnajb6        | Smarca4 | Slc2a3        |
| Xrcc4         | Ddb1    | Zhx2          |
| Psmc2         | Spg21   | Aen           |
| Rab2a         | Nt5c2   | Plaur         |
| Irf2bp1       | Jmjd8   | Mak16         |
| Ahsa1         | Ddost   | Gm20712       |
| Mlf2          | Tfip11  | Hinfp         |
| Wdr1          | Bnip3l  | Ii1rn         |
| Heatr3        | Prkaca  | Gpatch4       |
| Ube2k         | Hsd1l   | Ifi35         |
| Slc11a2       | Gdi2    | Crispld2      |
| 2610001J05Rik | Eif2a   | Klhl2         |
| Aars          | Fig4    | Glipr1        |
| Siah2         | Pccb    | Ankrd9        |
| Grn           | Hsd17b4 | Unc119        |
| Rnase4        | Ap3s2   | Lgals3        |
| Csnk2a1       | Sdhd    | Rpp38         |
| Cox10         | Tex261  | 5430416N02Rik |
| Rtn1          | Ifngr2  | Ahdc1         |
| Atg3          | Mfsd10  | Rnd1          |
| AC151967.1    | Arsa    | Wdr43         |
| Ube2f         | Ipo11   | Ctu1          |
| Crcp          | Lrrc61  | Pinx1         |
| Slc52a2       | Mrpl39  | Spns3         |
| Cct8          | Tmx2    | BC037034      |
| Rhog          | Ryk     | Plp2          |
| Snx17         | Agtrap  | Pdlim7        |
| Tmbim4        | Gm2a    | Ier5l         |
| Gars          | Sppl3   | Nifk          |
| Sec23b        | Iba57   | Hgsnat        |
| Ncbp1         | Wdr73   | Icosl         |
| Bag5          | Vhl     | Hilpda        |
| Litaf         | Trap1   | Eef1e1        |
| Utp6          | Srebf1  | Ppp1r13b      |
| Arfgap3       | Usp30   | B4galt1       |
| Gabarapl2     | Cptp    | Fhod1         |
| Atp1a1        | Plin3   | Grwd1         |
| Nom1          | Mthfd1  | Fhad1         |
| Mrps17        | Cux1    | Relb          |
| Rnf41         | Gnas    | Utp4          |
| Prmt5         | Kbtbd4  | Stk38l        |
| Snrnp40       | Fadd    | Homer1        |
| Prkag1        | Slc35f6 | Gm17066       |
| Mrpl16        | Nat6    | Rbms1         |
| Psmd12        | Rab9    | Srxn1         |

|          |               |               |
|----------|---------------|---------------|
| Smim7    | Ddx59         | Irf2bp2       |
| Ube2z    | Idh1          | Galnt18       |
| Bloc1s5  | Tmem97        | Mafb          |
| Anxa7    | Gtf3c5        | Pgs1          |
| Med22    | 2310022A10Rik | Kti12         |
| Nras     | St6galnac4    | Ccnd2         |
| Asnsd1   | Emc10         | Donson        |
| Pgd      | Borcs7        | Zbtb46        |
| Thoc3    | Fam219a       | Spns2         |
| Cdca4    | Zkscan17      | Zfp593        |
| Adipor2  | Got2          | Gm9625        |
| Elov1    | Atxn10        | Nol9          |
| Taf5l    | Echs1         | 4833413G10Rik |
| Arpc5    | Hps6          | 6330403L08Rik |
| Tmem38b  | Pgam1         | H2-T23        |
| Nupl2    | Naglu         | D16Ert472e    |
| Prkar1a  | Ttl12         | Lrrfip1       |
| Hspd1    | Mrpl10        | Mir1668       |
| Hdgf     | Gna12         | Pnp           |
| Cmpk1    | Abhd4         | B4galt5       |
| Agpat5   | Ctsl          | Trip10        |
| Ippk     | Gatd1         | Pnp           |
| Cisd2    | Homez         | Prr5l         |
| Tmem167  | Cln6          | Trmt61a       |
| Ap2b1    | Abhd8         | Zdhhc2        |
| Ticam1   | Ttyh2         | Lrrc4         |
| Clptm1l  | Acp1          | Eif3j1        |
| Sdhaf2   | Pef1          | Adgre5        |
| Wars     | Jpt2          | St5           |
| Wdr77    | Cd302         | Ttpal         |
| Smarca5  | Smpd1         | Vim           |
| Gps1     | Morn4         | Usp36         |
| Spop     | Oxa1l         | Snx18         |
| Ncdn     | Rpusd1        | Nkrf          |
| Snx24    | Abcb6         | Znrf1         |
| Vps4a    | Armc9         | Lonrf1        |
| Ctsa     | Cep19         | Gpr146        |
| Abhd17c  | Bckdha        | Ndufaf4       |
| Tmem185b | Bckdk         | Gnl3          |
| Ints5    | Ift46         | Exosc6        |
| Mettl16  | Slc39a11      | Rhoj          |
| Rpl7l1   | Dtnb          | Ogfrl1        |
| Stx12    | Dnaaf2        | Mmp14         |
| Rab5c    | Rit1          | Ddx21         |
| Pa2g4    | Nudt19        | Art3          |
| Tdrd7    | Wbp2          | Pus3          |

|          |         |            |
|----------|---------|------------|
| Wsb2     | Siae    | Ppp1r21    |
| Usp39    | Pebp1   | Bysl       |
| Mapkapk2 | Fbxw4   | Taf4b      |
| Csnk2a2  | Arl2bp  | Picalm     |
| Hnrnpf   | Vps33a  | Slc12a4    |
| Stard3nl | Maf1    | Nsun5      |
| Dnttip2  | Fundc2  | Xbp1       |
| Surf4    | Cln5    | Il1rl1     |
| Tmbim6   | Cdk4    | Mars2      |
| Smu1     | Gins4   | Lgi4       |
| Memo1    | Slc48a1 | Pacsin2    |
| Cdc16    | Supt7l  | Tmem198b   |
| Desi1    | Coil    | Larp1b     |
| Serbp1   | Shmt1   | Hsph1      |
| Prpf4    | Hagh    | Mat2a      |
| Cactin   | Mis18a  | Ctps       |
| Smyd5    | Dnal4   | Chchd4     |
| Ubl3     | Wrap53  | Trim46     |
| Cog8     | Rfc3    | Rpf2       |
| Atp6v1h  | Ncs1    | Dusp2      |
| Tmem19   | Mrpl49  | Nop56      |
| Pttg1ip  | Eno1b   | Slc2a1     |
| Eif4e2   | Ap5s1   | Mplkip     |
| Tpd52l2  | Csrp1   | Adpgk      |
| Ss18     | Lrfn3   | Vasp       |
| Mesd     | Orai2   | Ecm1       |
| Rela     | Ripk3   | Rcsd1      |
| Fam204a  | Ccm2    | Nlrx1      |
| Dazap2   | Ybey    | Tsc22d3    |
| Rab8a    | Got1    | Ccnd3      |
| Sqor     | Zfyve21 | Napepld    |
| Ykt6     | Msantd3 | AC131081.1 |
| Srp68    | Ckb     | Alkbh1     |
| Ywhaz    | Srd5a1  | Mtdh       |
| Mettl9   | Galk1   | Rac3       |
| Rnf4     | Furin   | Cbarp      |
| Brd7     | Ypel1   | Asic1      |
| Tmem189  | Nt5dc2  | Nle1       |
| Rac1     | Otud3   | Dus4l      |
| Hgs      | Poc1a   | Tbl2       |
| Agpat1   | Cby1    | Ddx17      |
| Rab11b   | Ephx1   | Snu13      |
| Letm1    | Prdx4   | Rbpj       |
| Calm1    | B9d2    | Gm15832    |
| Dars     | Fam216a | Urb2       |
| Becn1    | Commd9  | Scn1b      |

|               |               |          |
|---------------|---------------|----------|
| Sf3b4         | Dnajc9        | Slc29a2  |
| Ndrp3         | Mthfd1l       | Rgmb     |
| Ubl4a         | Pdk3          | Msmo1    |
| Tmem127       | Bmyc          | Man1a    |
| Ppp2ca        | Haus1         | Trmt10c  |
| Cdc42         | Chd3os        | Pim3     |
| Thoc5         | Dusp28        | Sptlc2   |
| Mboat7        | Kcnn1         | Klf16    |
| Rnf114        | Cox8a         | Arhgap22 |
| Mrps2         | Acaa2         | Zfp930   |
| Trmt6         | Dusp18        | Rhoc     |
| Plod3         | Cks1b         | Gripap1  |
| Bcl10         | Selenoh       | Ddx28    |
| Mark4         | Pdia5         | Agfg1    |
| 9530068E07Rik | Tacc3         | Mgat2    |
| Gpat4         | Scrn1         | Arrb2    |
| Xpnpep1       | Phf19         | Atg16l1  |
| Sec22b        | Slc46a3       | Pex11a   |
| Spcs2         | Rpa2          | Clic4    |
| Ubiad1        | Nipsnap1      | Creld2   |
| Imp4          | Ift27         | Cyp51    |
| Fam8a1        | Tmem17        | Lfng     |
| Rbm22         | Ppih          | Pprc1    |
| Tbc1d20       | B3glct        | Cycs     |
| Pcbp1         | Tyms          | Nfyb     |
| Get4          | Ak4           | Naa25    |
| Psmc5         | Nup37         | Ctu2     |
| Arl1          | Rftn1         | Polg     |
| Dync1i2       | Gmpr          | Tbc1d8   |
| Arf1          | Zfp691        | Slc31a2  |
| Metap2        | Chchd6        | Nus1     |
| Vapb          | Ptgfrn        | Zfp622   |
| Josd1         | Gm16580       | Usp16    |
| Ccdc43        | Cdk1          | Noc3l    |
| Micu1         | Tmem204       | Sema4c   |
| Kat14         | Tctn2         | Osbp19   |
| Itm2c         | Tmem175       | Nt5dc3   |
| Alg14         | 1700008J07Rik | Zmynd19  |
| Arl8a         | Nim1k         | Anxa3    |
| Rbm45         | Arl11         | Ftsj3    |
| Atp6ap1       | Fbxo17        | Nob1     |
| Polr2m        | Pmf1          | Gpx3     |
| Dync1li1      | Depdc1b       | Brix1    |
| M6pr          | Efhc1         | Kri1     |
| P4hb          | Ccne1         | Yars2    |
| Lamp1         | Cdt1          | Iffo2    |



|               |               |               |
|---------------|---------------|---------------|
| Nmt1          | Atp5g2        | Tmem81        |
| Chtop         | Mgst3         | Ppp2r5b       |
| Exosc10       | AI427809      | Itga5         |
| Grb2          | Fen1          | Wdr75         |
| Clptm1        | Gcat          | Scamp1        |
| Hnrnp1        | Asf1b         | Chst1         |
| Smc1a         | Hmgb3         | Nab2          |
| Pitrm1        | E2f2          | Tank          |
| Nup88         | Ighm          | Snx2          |
| Pold3         | Gm6055        | Dnajc21       |
| Pomt1         | Pttg1         | Atp23         |
| Orc5          | Colca2        | Tpm4          |
| Primpol       | Pigz          | Tpst2         |
| Vars2         | Gpr162        | Gm6277        |
| Fbf1          | Gdf1          | Rrp9          |
| Vrk1          | AI467606      | Abce1         |
| Med24         | Ulk4          | Dph2          |
| Tmem110       | Rab7b         | Hyou1         |
| Prr14         | Azin2         | Pigw          |
| Eml3          | Vps37d        | Wdr4          |
| Smpd4         | Nlrp1b        | Dimt1         |
| Mccc1         | Pdgfrl        | Hsbp1         |
| Abcd4         | Calr3         | 8430429K09Rik |
| Fam149b       | Ntn4          | Fam129b       |
| E130307A14Rik | Ccnb2         | Dram1         |
| Cnot3         | B9d1          | Fam220a       |
| Zfp651        | Syce2         | Trp53rka      |
| C87436        | Cdca8         | Gtf2a2        |
| Hps1          | Pbk           | Ddx51         |
| Acap3         | Naaa          | Ifrd2         |
| Odf2          | Gm6594        | Sox13         |
| Stx5a         | Fabp5         | Sdad1         |
| Abcd1         | Cdc20         | Smox          |
| Parp16        | Irak1bp1      | Utp11         |
| Atpaf2        | Mlf1          | Tlnrd1        |
| Ankmy2        | Ube2c         | Tut1          |
| Gm43064       | Rbfox3        | Ptpn1         |
| Mk11          | Birc5         | Mex3a         |
| Hp1bp3        | Tmem107       | Dnajc25       |
| Stau1         | Cdkn3         | Heatr1        |
| D6Wsu163e     | Sept4         | Itpripl1      |
| Lamtor3       | Fabp3         | Exosc1        |
| AL732309.1    | Lpl           | B3galt6       |
| Tmpo          | Cdc25c        | Sipa1         |
| Lrch4         | 2010008C14Rik | Ccdc137       |
| Ap4b1         | Dnph1         | Banp          |

|         |               |               |
|---------|---------------|---------------|
| Ctage5  | Cenpw         | Rrp12         |
| Git2    | Car7          | Gm20537       |
| Acin1   | 1700025G04Rik | Ifngr1        |
| Gstm4   | Bcar3         | Mvp           |
| Taok2   | Spc24         | Card19        |
| Ankrd10 | E130215H24Rik | Nmd3          |
| Limk2   | Tmem178       | 1110038B12Rik |
| Evi5l   | Slpi          | Rrp1b         |
| Tmem129 | AC163703.1    | Map2k3        |
| Ugdh    | Nlrp1a        | Ppid          |
| Aldh4a1 | Depdc1a       | Utp18         |
| Mcoln1  | Gm15326       | Polr3e        |
| Ptpn23  | Cenpm         | Rbm34         |
| Clk4    | Cox4i2        | Cebpz         |
| Zbtb44  | Clec2l        | Nhlrc1        |
| Map3k14 | Gchfr         | 1600014C10Rik |
| Exoc1   | Mnd1          | D1Ert622e     |
| Trafd1  | Kbtbd6        | Spata5        |
| Hars2   | Scml4         | Usp2          |
| Stoml1  | Ramp1         | Tmbim1        |
| Scrn3   | Ascl1         | Hgh1          |
| Wdr11   | Rmi2          | Gm45736       |
| Dgcr8   | Cxcr3         | 2410002F23Rik |
| Rbm39   | Kbtbd12       | Gnl2          |
| Scfd2   | Tmem266       | Ccdc134       |
| Cdadc1  | Crip3         | Gatsl3        |
| Rnf123  | Cyp2r1        | Rrp8          |
| Tmem143 | Wipf3         | Gdap2         |
| Gpbp1l1 | Cfap77        | Plekha3       |
| Recql5  | Dnali1        | Trim27        |
| Dcun1d2 | Gm4316        | Ccdc71l       |
| Plekhh2 | Gm26520       | Fam217b       |
| Tmem55a | Rab17         | Syng2         |
| Zfp27   | B430305J03Rik | Srebf2        |
| Poli    | Adam5         | Wfs1          |
| Unk     | Perp          | Dnaja2        |
| Uaca    | 4833417C18Rik | Sco1          |
| Mavs    | Actn2         | Arhgef7       |
| Terf1   | D330045A20Rik | Stat3         |
| Zfp839  | Melf          | Xkr8          |
| Suox    | Fv1           | Fam118a       |
| Zswim9  | Gm42793       | Lsm11         |
| Pbx3    | Gm7666        | Anapc16       |
| Mroh1   | Gm12286       | Slc7a5        |
| Ganc    | AC027700.1    | Gm45867       |
| Trpm4   | Syng4         | Dlg3          |

|            |               |            |
|------------|---------------|------------|
| Ripor1     | Gna14         | Spryd3     |
| Cabin1     | Klhdc9        | Med7       |
| Cep131     | Lhx6          | Dnaja1     |
| Fuk        | Tnfrsf26      | Zyx        |
| Tctn3      | 2610035F20Rik | Ube2j2     |
| Esyt1      | Igfbpl1       | Spryd7     |
| Oser1      | 6030442K20Rik | Snupn      |
| Ift172     | Gm20083       | Rab11a     |
| Inpp5e     | Gm10699       | Rrp15      |
| Ddhd2      | Ephx4         | Slc7a6os   |
| Mppe1      | Gm42879       | Tapbp1     |
| Tmem230    | Grp           | Fez2       |
| Capn10     | Duoxa1        | Src        |
| Zfp740     | Blk           | Fbxo22     |
| Mbd1       | Kcnv1         | Tigd5      |
| Cep250     |               | Surf6      |
| Rasa3      |               | Ece2       |
| Plcd1      |               | Znhit6     |
| Rgl1       |               | Exoc8      |
| Arhgef10l  |               | Ncoa5      |
| Nipa1      |               | Stim2      |
| Frg2f1     |               | Uspl1      |
| BC017158   |               | Sh3bp2     |
| Tinf2      |               | Kras       |
| Mlh1       |               | Noc4l      |
| Tspyl1     |               | Aebp2      |
| AL732309.2 |               | Irf2       |
| Cbx4       |               | AC134869.3 |
| Srrm1      |               | Cnih4      |
| Vav2       |               | Zfp330     |
| Hexdc      |               | Gtf2f2     |
| Fam160a2   |               | Naf1       |
| Vps39      |               | Ube2w      |
| Camk2g     |               | Lrrfip2    |
| Smtn       |               | Rgl2       |
| Eri2       |               | Pik3cb     |
| Slx1b      |               | Cd82       |
| Srsf11     |               | Ap2a2      |
| Usp48      |               | Isca1      |
| Hnrnp1     |               | Zc3h15     |
| Aaas       |               | Sdccag3    |
| Lmnb2      |               | Txnrd1     |
| Stk38      |               | Diexf      |
| Cc2d1b     |               | Cdv3       |
| Tdrd3      |               | Tmem104    |
| Hsf2       |               | Cnbp       |

Tmem44  
Ube4b  
Adrb2  
Appl2  
Spata7  
Cep85  
Sept10  
Zscan29  
Mknk2  
Hmg20a  
Cbr4  
Cep95  
Plekhg5  
Smc3  
Mau2  
2610301B20Rik  
Rabl2  
Exog  
Rassf3  
Slc41a3  
4930430F08Rik  
Phactr1  
Rfesd  
Ndor1  
Syde1  
Fbxl4  
Sfmbt1  
2610008E11Rik  
Brd8  
Acsl1  
Wdr59  
Fam35a  
Rpap1  
Hnmt  
Kif7  
Foxp1  
Txndc16  
Dhx57  
3110043O21Rik  
Nsun6  
Stk11ip  
Cntrob  
Slc25a37  
Phka2  
Fbxo25  
Kif3a

Rbm15b  
Stat6  
Slc37a3  
Ciapin1  
2410004B18Rik  
Rnf31  
Manf  
Yrdc  
Nop14  
Mrps18b  
Diaph1  
Wdr3  
Dnaja4  
Ubt1  
Slc25a45  
Smim15  
Pigx  
Caml  
St7l  
Knop1  
Ptges3  
N4bp1  
Nol10  
Glrx  
Vapa  
Rrbp1  
Tcof1  
Btbd1  
Eif2s2  
Vkorc11  
Atpaf1  
Eed  
Pomk  
Ddx39  
Dlgap4  
Fam131a  
Carhsp1  
Hspa4  
Ddx50  
Mbd2  
Rnf149  
Taf15  
Ythdf2  
Btbd19  
Set  
Pwp2

Nrep  
Eif2ak3  
Zmynd8  
P3h3  
Rubcn  
Rbm5  
Cep57  
Tcirg1  
Kctd9  
Hlcs  
Nsmaf  
Polm  
Golgb1  
Slc5a6  
Ptpns  
Adgrl1  
Mta3  
Plid1  
Tgif1  
Pou6f1  
H2afy2  
Rad50  
Trmt13  
Chkb  
Mlh3  
Ap4m1  
Ptpro  
Tmem71  
Ephb4  
Zfp646  
Cdk5rap2  
Zrsr1  
A230050P20Rik  
Thnsl2  
Abtb1  
Ap5z1  
Ift88  
Setdb2  
Calcoco1  
Cdk2  
Ccnc77  
Ccnl1  
Incenp  
Gpr137b-ps  
Dtx1  
Mettl8

Ddah1  
Zbtb7b  
Ddx27  
G3bp1  
Ltv1  
Csad  
Senp6  
Zfp598  
Nadk  
Ube2h  
4921524J17Rik  
Laptm4b  
Ppp4r1  
Actr3  
Por  
Rsl24d1  
Inpp5a  
Rnmt  
Ddx31  
Ube2g2  
Tigd2  
Stip1  
Hcfc2  
Kcmf1  
Syncrip  
Eif4e  
Txndc11  
Thumpd1  
Hspa5  
Acvr1b  
Hnrnpu  
Esf1  
Nol8  
Rala  
Ywhag  
Hyal2  
Ube2q2  
Pspc1  
Paqr7  
Till1  
Anks1  
E2f4  
Atp6v0a1  
Tvp23b  
Ube2n  
Zfand3

Scarf2  
Zmym6  
Epm2a  
Zfp873  
Ift122  
Kif3c  
D3Ert751e  
Rmnd5a  
Gla  
Atg2b  
Hacd4  
Megf8  
Rasa4  
Nek8  
Cdan1  
Ece1  
Hmgxb4  
Plekha8  
Slc38a6  
Tspyl2  
Mtss1l  
Crbn  
Ppwd1  
Foxn3  
Cul9  
Cdk19  
Abcc10  
Tia1  
Map2k7  
Iqce  
Snx7  
Zfp217  
Tead3  
Sec61a2  
Mdga1  
Mks1  
Sec22c  
Ehhadh  
Nemp2  
Nptxr  
AC122428.2  
Zfp286  
Nbr1  
Plpp3  
Arhgap24  
Brdt

1600012H06Rik  
Bnip2  
Ube2d1  
Fam98a  
Tomm70a  
Prmt6  
Stx6  
Pak1ip1  
Hibch  
Cab39  
Sbds  
Riok1  
Fam104a  
Ube2d2a  
Ndfip2  
Mcf2  
Rap1a  
Ptpn2  
Ppp2cb  
Senp2  
Uba5  
Larp4b  
Eif2s1  
Lonp2  
Ercc2  
Selenos  
Ppp3r1  
Utp14a  
Smndc1  
Nol11  
Strap  
Fpgs  
Gbbp1  
Zfp553  
Psme3  
Ddx10  
Mogs  
Zc3h7a  
Dcakd  
Dcaf13  
Fam214b  
Tbrg4  
Riok3  
Fam136a  
Ubxn4  
Mkl1

Lrig2  
Mum1  
Epc1  
Tdp2  
Dnajib4  
Setmar  
Arhgef25  
Wdcp  
Gm20532  
Polr2a  
Zfp61  
Madd  
Inpp1  
Recql4  
Kdm3a  
Dcaf17  
Wdr81  
Fads2  
Zfp386  
Adra2a  
Fgfr3  
Gabbr1  
Pan2  
Mfsd4b4  
Vstm4  
Bbs5  
Ubn1  
Klf6  
Scd2  
Pafah2  
Rbm15  
Xpo1  
Pan3  
Rfx2  
Ubr2  
Exoc6  
Cenpj  
L3mbtl3  
4833420G17Rik  
Rufy2  
Rbfox2  
Apba1  
Zfand4  
Sif1  
Mnt  
Tmem241

Yaf2  
Ufm1  
Noc2l  
Ppp2r2a  
Tars  
Vta1  
2510039O18Rik  
Pex13  
Tcn2  
Ddx24  
Rap1gds1  
D11Wsu47e  
Farsa  
Ubqln4  
Rad23a  
Pxn  
Ghdc  
Ywhah  
Ppp1r2  
Slc31a1  
Dnaja3  
AC147560.1  
Pitpna  
Rmdn3  
Ddx18  
Whamm  
Blcap  
Dnajib11  
Kmt5a  
Phf10  
Rap1b  
Efhd2  
Ankrd49  
D10Wsu102e  
Lsg1  
Map7d1  
Elavl1  
Acot9  
Tmem248  
Gskip  
Minpp1  
Odc1  
Nrf1  
Rufy3  
Ythdf1  
Rab21



|               |               |
|---------------|---------------|
| Ppp1r15a      | Wdr5          |
| Fos           | Arih2         |
| Gm14276       | Atad3a        |
| Stk35         | Fbxo45        |
| Gm15601       | Capza2        |
| Ccl22         | Rbm18         |
| Mmp13         | Hsf1          |
| Gpr15         | Cers2         |
| Ch25h         | Derl2         |
| Ppbp          | Adam15        |
| Gm5879        | Tsr2          |
| Rtn4rl2       | Mgrn1         |
| AC238811.2    | Metap1        |
| Dmkn          | Phf14         |
| Palm3         | Pum3          |
| Ackr1         | Hspa9         |
| Tulp1         | Elac2         |
| Dmp1          | Strn4         |
| Gm14963       | Pno1          |
| Gm5781        | Rwdd4a        |
| Ms4a6c        | Zcchc9        |
| C3            | 2810004N23Rik |
| Fank1         | Coro1c        |
| Gm8210        | Senp3         |
| Entpd3        | Ncl           |
| H2-M2         | Wdr36         |
| Gm4754        | Krr1          |
| Hmcn2         | Atrip         |
| Plin5         | Usp4          |
| Gm10288       | Pabpc4        |
| Cdkn2b        | 38412         |
| Spint2        | Mrps5         |
| Ptpn7         | Axin1         |
| Gm15536       | Zdhhc18       |
| Rpl39-ps      | Efl1          |
| Ccnb1ip1      | Fbxw7         |
| Ms4a6d        | Ubqln1        |
| Prr15         | Gnb1          |
| C1s1          | Lrrc47        |
| H2-DMb1       | Cct6a         |
| 1700016A09Rik | Pi4k2a        |
| Rnaset2a      | Tsnax         |
| Crry-ps       | Pgam5         |
| Sox3          | Aida          |
| Capg          | Mark3         |
| Gm10076       | Sar1a         |

Plscr1  
Gm15772  
Gpr85  
9330162G02Rik  
Slc25a29  
Gm15417  
Necab2  
Gm12166  
Kcnmb4  
Timm10  
Tlr13  
Gar1  
H2afj  
a  
Eva1b  
Trp53rkb  
Rps24  
Nop16  
Rps14  
Kcnk6  
Hck  
Fau  
Epop  
Rhbf2  
Srm  
Igfbp7  
A430035B10Rik  
Rplp2  
Lcp2  
Rps19bp1  
Gm9025  
Eps8  
Gm45713  
Wnk1  
Sirpb1c  
Cdkn1a  
Abl2  
Trappc4  
Cox17  
Rpl23a  
Mrpl12  
Kcnab3  
Mir5121  
Tusc1  
Pgp  
Rplp0

Akirin1  
Maea  
Ppm1a  
D17Wsu92e  
Smap2  
Strip1  
Pwp1  
Ppp3ca  
Wbp1l  
Sec62  
Pmpca  
Fip11l  
Dnm2  
Afg3l2  
Nap1l4  
Ash2l  
Cdc42se1  
Gorasp2  
Spats2  
Ldah  
Morf4l1  
Nars  
Rab35  
Rab7  
Ehmt2  
Dcaf8  
Ralbp1  
Lta4h  
Rufy1  
Nde1  
Ints10  
Nub1  
Rft1  
Taf6  
Dok1  
Etfdh  
Gatc  
Gorasp1  
Tpra1  
Zw10  
Mat2b  
Akirin2  
Mccc2  
Mfsd11  
Ewsr1  
Coro7

Epo  
Abhd17b  
Gm7785  
2310039H08Rik  
Anxa2  
Fhit  
Tpt1  
Tmem11  
Psm6  
Aprt  
Rps3  
Cox7a2l  
Tbcc  
Kyat1  
Aimp2  
Lyn  
Rps11  
Zdhhc14  
1810037117Rik  
Tmem37  
Tmed2  
Fscn1  
Eif3d  
Rps16  
Npl  
Pmp22  
Kxd1  
Faim  
Hnrpa0  
2010111I01Rik  
Atf5  
Dapk3  
Fitm2  
2310011J03Rik  
Ostf1  
Rps4x  
Leprotl1  
Mrpl17  
Ap4s1  
Cct3  
Rrp7a  
Gas2l1  
Etv6  
BC003965  
Eif2b4  
2310015A10Rik

Hdac6  
Wipi2  
Mapk7  
Klhl22  
Sppl2b  
Slc12a9  
Ttc5  
Lrsam1  
Sh3bp5l  
Cul7  
Paics  
Mast2  
Nup50  
Med16  
Fkbp9  
Suv39h1  
Hk1  
Rfxank  
Slc25a12  
Dscr3  
Cnot9  
Tada2a  
Tab1  
Rad51d  
Hmgn2  
Cep78  
Zfp362  
Zfp467  
Pik3c3  
Dars2  
Phtf1  
Btd  
Tmem126b  
Lin52  
Hdac5  
Gga2  
Dbf4  
Ap3m2  
Abcb8  
Rnf122  
Ppp6r2  
Acadl  
Pfkml  
Rragc  
Chd1l  
Slc10a7

Tusc2  
Twistnb  
Nudt18  
Ebna1bp2  
Cadm4  
Cox18  
Eloc  
Polr1e  
Dph3  
Rpp30  
Gpn1  
Ddx54  
Tomm20  
Vopp1  
Rrp1  
Alg3  
Rpl22  
Zdhhc20  
Myl12a  
Ccdc25  
Limd2  
Gpn2  
St3gal5  
Stk11  
Rars  
Tspan5  
Rassf2  
Def6  
Nudt3  
Aatf  
Nubp2  
Ccdc115  
Shisa5  
Pin1  
Sco2  
Rbm17  
Rnf126  
AU019823  
Txnl1  
Shkbp1  
Yif1a  
Pknox1  
Aste1  
Dbnl  
Trabd  
Larp1

Ints1  
Fbxo8  
Psip1  
Sord  
Btbd6  
Gm29253  
Atp13a2  
Gle1  
Manba  
Svip  
Wdtd1  
Kdelc2  
Xntrpc  
Pdc4  
Cyb5d2  
Hs1bp3  
Me2  
Fam69a  
Trmt2b  
1110008L16Rik  
Orai3  
Dusp22  
Arhgap17  
Pqlc1  
Fech  
Emc1  
Ezh1  
Ext2  
Rcbtb2  
Pex10  
Rnf26  
Mtbp  
Cdkn1b  
Lrrc40  
Ggact  
Selenon  
Stx2  
Nqo2  
Pot1a  
Nrde2  
Cenpo  
Pgpep1  
Ints7  
Gpr89  
Cyb5rl  
Aagab

Pou2f2  
Lsm12  
Kdelr2  
Mfsd13a  
Ctsf  
Pea15a  
Trdmt1  
Txnl4a  
Ptpn9  
Eid2b  
Timm17a  
Rfk  
Lrrc14  
Ppm1g  
Zfp787  
Ovca2  
C1qbp  
Txn2  
Fam3c  
Ctsd  
Lins1  
Smg9  
Sar1b  
Cacybp  
Tmem5  
Rtfdc1  
Arv1  
Cops4  
Itm2b  
Atp6ap2  
Preli3b  
Ilk  
Trmt11  
Gatad1  
Eif3h  
F8a  
Itfg2  
Pafah1b2  
Etv5  
Tnfrsf1a  
Rraga  
Cars  
Rrn3  
Abcf3  
Ppm1b  
Ubtf

Lrrc49  
Zfp346  
Mapk14  
Ick  
Abca7  
Ip6k1  
Pms2  
Mbtps1  
Fbxo3  
Accs  
Sec14l1  
Extl2  
Slc20a2  
Etfbkm  
Xndc1  
Ranbp10  
Tmco6  
Pnk  
Fbxo10  
Rpa1  
Prim2  
Pi4k2b  
Zbtb5  
Rfc1  
Sirt3  
Ints9  
Dpy19l1  
Spice1  
Ninl  
Trim62  
Kdsr  
Garnl3  
Pfkfb4  
Endod1  
Helq  
Vwa8  
Top3a  
Cdk20  
Fam171a1  
Cep57l1  
Pck2  
Maged1  
Zhx3  
Arhgap33  
Zfp687  
Sertad3

Ppp1r9b  
Tcp1  
Mapkapk3  
Ubash3b  
Lemd2  
Thap4  
Mybbp1a  
Mob3a  
Commd7  
Arf6  
Fam49b  
Hdac2  
Dhx29  
St7  
Cdipt  
Itgb5  
Saraf  
Smarce1  
Rfwd2  
Zfp706  
Ercc8  
Lap3  
Agap3  
Eif3m  
Erp44  
Bcas3  
Mtap  
Gabbp1  
Lrp10  
Dusp3  
Capzb  
St3gal3  
Frm8  
Rab14  
Cenpb  
Pcmt1  
Os9  
Wdr61  
Cd151  
Chtf8  
Rab1a  
Golga7  
Egln1  
Sec61a1  
Hsp90ab1  
Dpagt1

Amacr  
Lrrc56  
Pigh  
Elmod3  
Pygb  
Focad  
Rnf157  
Ezh2  
Emsy  
Trim37  
Cchr1  
Bbs4  
Erg28  
5530601H04Rik  
Coq10a  
Pik3cd  
Katnb1  
Zfp395  
Atg9a  
Loxl3  
Wdr45  
Gnb5  
Cerk  
Pxmp4  
Atg2a  
Osbp12  
Atg14  
Lmn1  
Cnrip1  
Atg13  
Pcna  
Cd9912  
Slc25a44  
Wdr91  
Pgm2  
Cad  
Pcyox1  
St6gal1  
Pnrc2  
Map3k20  
Abcb4  
Dglucy  
Cryz  
Chek2  
Crebl2  
Bace1

Csnk1d  
B4galt7  
Gm28551  
Copb2  
Kif1bp  
Adprh  
Ctbp1  
Cd81  
Rtn3  
Eef1a1  
Rhoa  
Txndc9  
Fam98b  
Actr1a  
Lman2  
Acadm  
Casc3  
Raf1  
Vps51  
Birc2  
Rsrc2  
Tjap1  
Trim41  
B4galt4  
Rps6kc1  
Naa40  
Fut8  
Ap1g2  
Dclre1a  
Ano8  
Hdac10  
Pank4  
Acox3  
Msl3  
Plpbp  
Ccgc66  
Ppm1k  
Msantd2  
Tmem94  
A530017D24Rik  
Inpp5k  
Tef  
Pcgf6  
Sat1  
Plcg1  
Cflar

Tmem86a  
Rgs2  
Wdr6  
Scpep1  
Tbc1d17  
Pola2  
Gm45208  
Klc4  
Cracr2b  
Armcx6  
Rbmh  
Mpv17l  
Fndc10  
Hadh  
Lrig3  
Cercam  
Vangl2  
Hirip3  
Zer1  
Gtf2ird1  
Trim59  
Adk  
Ccgc167  
Mettl27  
Ccgc125  
Emilin1  
Plekhh3  
Gabarapl1  
Slc44a2  
Lamb2  
Pole3  
Msh2  
Ctdspl  
Hspb6  
Tedc2  
Usp49  
Dmac2  
Rnf167  
Tfdp2  
Xrcc2  
Nfkbie  
H2afz  
N4bp2l1  
Casp2  
Fam222a  
Gpr137b



Fam149a  
Ggcx  
Acss1  
Rbm48  
Tgfb1i1  
B3gnt1  
Slc9a3r2  
AW146154  
Ankrd13d  
Kdm4a  
Ankrd24  
Dek  
Numa1  
Stx17  
Pias3  
Zfp772  
Ptpdc1  
Taok3  
Unc13b  
Herpud1  
Aldh5a1  
S1pr2  
Dck  
Add3  
Odf2l  
Gm46430  
Pnpla6  
Pkp4  
Carf  
Adcy5  
Slc35e2  
Lpar6  
Dennd6a  
Prkab2  
Cdr2l  
Ccng2  
Prickle3  
Tbc1d15  
Rbm33  
Nid2  
2700097O09Rik  
Tceanc  
Ccgc62  
Aasdh  
Ccgc191  
Nlgn2

Cnnm3  
Slc18b1  
Cep72  
Tmem140  
Mtmr10  
Acot2  
Ptpn21  
Aldh2  
Smc4  
Tnfrsf19  
Cnnm2  
Dvl2  
Fbxo21  
Ccgc102a  
Gnb4  
Acot6  
Fbxl20  
Bora  
Xylt2  
Plekhn1  
Lpxn  
Ctns  
Rfwd3  
Fut10  
Vps18  
Zfp709  
Pdk2  
Capn5  
Rab11fip5  
Abcb10  
Crocc  
Plk4  
Tipin  
Nat8f4  
Shpk  
Fam189a2  
Rbl2  
Mmp11  
Pcnt  
Cenpq  
Mcm8  
Stard5  
Narf  
Oscp1  
Acsf2  
Ldlrap1

Arid3a  
Mapkbp1  
Ccadc136  
Cntrl  
Cep162  
Ank2  
Sass6  
Crebbp  
Tshz2  
Slc38a9  
4931414P19Rik  
Rtel1  
Taf5  
Ddias  
Cenpl  
Cnst  
Prpf39  
Ccadc149  
Col5a2  
Ephb3  
Ampd3  
C130074G19Rik  
Gcfc2  
Nfatc1  
Ints6l  
Serp8  
Bbs1  
P2rx7  
Lamc3  
Gpr155  
Parp8  
Hdhd3  
Mapk1ip1  
Tob2  
Fgd1  
Haus6  
Mdm1  
Slc29a3  
Tctn1  
Rwdd3  
Vwa5a  
Proser3  
Mical3  
Erbp2  
Zfp874a  
Snhg3

Dact3  
Cpped1  
Glis2  
Acy3  
Abhd6  
Fmo5  
9330102E08Rik  
Rfc4  
Smyd4  
Nat8l  
Pgm2l1  
Mxd4  
Tpcn1  
Tcp11l2  
H6pd  
Haspin  
Vsig10  
Frat1  
Pear1  
Pcyt1a  
Cir1  
Ccadc14  
Cdc25b  
lpp  
Tube1  
Tom1l1  
Dsn1  
Acaca  
Abca2  
Hdac7  
Arhgap31  
Cntln  
Ttc38  
Mok  
Cln8  
Coq8a  
Mcm4  
Afap1l2  
Prom1  
Wdr62  
Ppm1l  
Zfp827  
Traip  
Nek3  
Atp6v0e2  
Gatsl2

Pcf11  
Plcd3  
Zfp62  
Ppfbp2  
Ehd2  
Cep164  
Sh3d19  
Tspyl4  
Plxnc1  
Klf11  
Fam102a  
Mtrf2  
Tulp3  
Iqgap3  
Bcl2l11  
Gdf11  
Ing3  
Slc36a4  
Dact1  
Zfp14  
Arhgef3  
Pik3r3  
Zfp940  
Pms1  
Ppp1r12b  
Ccdc142  
Gin1  
Srgap3  
Dqx1  
Zfp369  
Pfkfb2  
Abhd3  
AW549877  
Marf1  
Zfp182  
Tgfb2  
Zfp65  
Tmtc4  
Rb1cc1  
Itga7  
Npr2  
Nexn  
Hectd4  
Dgke  
Hcn3  
A130077B15Rik

Tmem229b  
Hbp1  
Gpsm2  
Cyb5r1  
Pkmyt1  
Fam171a2  
Hmgb2  
Rgs7bp  
Uevld  
Espl1  
Tango6  
Naga  
Wdr19  
Nes  
Gpr4  
Mblac2  
C330027C09Rik  
Lin28b  
Palm  
Nudt7  
BC055324  
Sulf2  
Hid1  
Pola1  
Zfp101  
Sesn1  
Zfp41  
Hmgcs2  
Klhl3  
Wdr90  
Mical1  
Fbln5  
Rilpl2  
Aif1l  
Rbm43  
Rassf7  
Ska2  
Flcn  
Chst15  
Ptk7  
Cbx5  
Trim14  
Efcab7  
Hspa12b  
Cenps  
Maob

Tubgcp5  
Hyal1  
Tifa  
Adcy6  
Clcn2  
Msh3  
Vamp1  
Slc37a1  
Lpp  
Zmym3  
Abcc5  
Arhgap29  
Zfp984  
Ppp4r1l-ps  
Zfp783  
Abhd18  
Mansc1  
Engase  
Ccdc138  
Casc4  
Mphosph9  
Topbp1  
Tspan18  
Zfp512b  
Akap17b  
Serp7  
Rab11fip4  
Tril  
Rab30  
Ttil13  
Il16  
Rnft2  
Pcmd2  
Akap10  
Amotl2  
Prkag2  
Arnt2  
Impact  
Lrp8  
Arid5b  
Cep295  
Tmem64  
Tcf711  
Spata2l  
Mthfr  
Triqk

Epor  
Cbx6  
Tbc1d30  
Wdr76  
Espn  
Rgs3  
Ccdc120  
Zfyve1  
Tmem138  
Arhgef39  
Gins3  
Tex52  
Gemin8  
Mir546  
Naip6  
Lix1  
Cep44  
Ctdsp2  
Rps6ka5  
Pitpnm2  
Card11  
Farp1  
Melk  
Bcl7a  
Hjurp  
Mpc1-ps  
Rel1  
Gins1  
Zfp862-ps  
Ncaph  
AU020206  
Tppp  
Skp2  
Clec14a  
Lig1  
Als2cl  
2700049A03Rik  
38961  
Chst10  
Tmem218  
Rcan3  
Anks6  
Diaph3  
Natd1  
Slc26a11  
Slc25a19

Arhgef9  
Ptch1  
Dse  
Helb  
Atp6v0c  
Epb4115  
Chst2  
Tnc  
Zfp119a  
Hrh1  
Cacnb2  
Snph  
Pidd1  
Myh10  
P2rx6  
Fgd4  
Arhgef6  
Fcho1  
Slc25a42  
Smcr8  
Aplnr  
Bicra  
Susd4  
Mns1  
Pml  
Clk1  
Zfp692  
Grb10  
Kazn  
Kank2  
Ankrd28  
Acad12  
Wdr5b  
Lacc1  
Platr25  
C2cd5  
Gm5113  
Bbs10  
Ntrk3  
Samd4  
Afdn  
Fyco1  
Rbl1  
Eml1  
Cyp27a1  
Hspa12a

Rad18  
Lrrc1  
Rfc5  
Slc38a3  
Rnf144b  
Ephb6  
Amz1  
Tpx2  
Chtf18  
Arhgef10  
Mcm3  
Smad6  
Ncapd3  
Xrcc3  
Nmral1  
Crybg3  
Ago4  
Prc1  
Jam2  
Ccgc40  
Pard6g  
C77080  
Sdc1  
Lpin1  
Cand2  
Rrm1  
Mcm6  
Ahrr  
Ulk1  
Cdh6  
Peli3  
Slc43a1  
Efcab11  
Rad51c  
Sapcd2  
Cep55  
Cers1  
Brca2  
Dchs1  
Fancm  
Haus5  
Olfml2a  
Slc17a5  
4930452B06Rik  
Sh2d3c  
Wdhd1

Gm20662  
Ankrd12  
D130040H23Rik  
Efnb2  
Rere  
Dzip1  
Kif13b  
Fah  
Pfkfb1  
Zfp383  
Cbs  
Zfp174  
Zkscan7  
Cxcl12  
Adam12  
Grin2d  
Obsl1  
Pip5k1b  
Syngap1  
A930024E05Rik  
Eva1a  
Mlit3  
Smc2  
Angptl7  
Zic2  
Plekha5  
Dock6  
Trim25  
Chd6  
Gab3  
9330104G04Rik  
Ablim1  
Nfatc4  
Khyn  
Nfkbiz  
Zfp423  
Thsd1  
B230354K17Rik  
Psme2b  
Zfp874b  
Tcaf2  
P4htm  
Epb41l3  
Pard3  
3830408C21Rik  
Ccgc3

Crebrf  
Hacl1  
Dnajc28  
Kif20b  
Aspa  
Mrgpre  
Pycr1  
Cenpn  
Palb2  
Hacl1  
Zfp784  
Fancb  
Akt3  
Zfp667  
Sorbs3  
Ckap2  
Top2a  
Smim10l2a  
Fam212b  
Zfp791  
Prkar2b  
Psmc3ip  
Slc7a4  
Dyrk1b  
Hells  
Efs  
Gspt2  
Gtse1  
Vash2  
Mzf1  
Mad2l1  
Pkd1  
Mms22l  
Pcp4l1  
Kifc5b  
Zfp30  
Kif26a  
Rnf150  
Nuf2  
Cdon  
Atad5  
Sgsh  
Nsl1  
Ret  
Unc5b  
Abcg3

Gabpb2  
Kriba1  
Hykk  
Fli1  
Trpc2  
Ptpv  
AA986860  
Spon1  
Prox2  
Gpr19  
Slit1  
Jun  
Zfp975  
Kcnab1  
Stox2  
Atf7ip  
Lepr  
Kmt5c  
Kalrn  
Ano1  
Dlg5  
Ackr3  
BC065397  
Ranbp17  
Bicc1  
Phactr2  
Tbc1d31  
Gstt3  
Gucy1b3  
Wfikkn1  
Gper1  
Fmo1  
Mylk  
Rin1  
Fbln2  
Ppp1r16b  
Sgsm1  
Podxl  
Caprin2  
Ppp1r26  
Fan1  
Foxl2  
Gm16907  
Slc9a5  
Nhs12  
Uvssa

Ttc26  
Ptpre  
Mcm2  
Gins2  
Epb41l4a  
Hmnr  
Reep1  
Arhgef15  
Pcyt1b  
Racgap1  
Trpm6  
Cenpe  
B930095G15Rik  
Mindy4  
Gm44596  
Cit  
Pir  
Pold1  
Blm  
Fam221a  
Tmem67  
Cdca7l  
Cmah  
Enho  
Mcm7  
Nusap1  
Chek1  
Dnmt1  
Kif4  
Fam83d  
Lrrc20  
Fsbp  
Dut  
Mis18bp1  
Gramd1b  
Anln  
Kctd12b  
Ncapd2  
Arhgap19  
Dnajb14  
Impa2  
Cdca5  
Orc1  
Cdca2  
Kctd15  
Adgra2



Limch1  
Snx30  
Npy1r  
Srpk3  
Plekhm3  
Arhgap11a  
Fnip1  
Ank1  
Lama1  
Ccp110  
Rcan2  
Arid4a  
AC159813.1  
Zscan18  
Osbp10  
Slc38a4  
Rarres1  
Nr2f2  
Elavl4  
Sema4b  
Il17rd  
Etl4  
Ldlrad3  
Ednrb  
Bmp4  
Auts2  
Caskin2  
Unc79  
Acacb  
2610318N02Rik  
Antxr1  
Zeb2  
Klf2  
Itpr1  
AC131687.1  
Plekhh2  
Znrf3  
Syt12  
Kantr  
Mamld1  
Raph1  
Rnf144a  
Ccdc57  
Sfmbt2  
AC151836.1  
Edn3

Crocc2  
Tarsl2  
Ckap2l  
Ranbp3l  
Ccna2  
Polq  
Ect2  
Lrrn3  
Mob3b  
Pacsin1  
Chrd  
Haus4  
Pcbd1  
Tsku  
Tcdc1  
Bub1b  
Aldoa  
Mdfi  
Npcd  
Kif20a  
Shcbp1  
Ccnf  
4930522L14Rik  
Cep97  
Foxm1  
Armc2  
Skida1  
Nipal3  
Fign1  
Fanca  
Zwilch  
Tcf7  
Fancd2  
Mrnip  
Rad51ap1  
Map4k1  
Ncapg2  
Zgrf1  
Spag5  
Tbc1d4  
Gas2l3  
Ulbp1  
Trerf1  
Cdc42ep1  
Knstrn  
Ncapg

Atp10d  
Slamf6  
Bmp5  
Rasal2  
Kihl24  
Egf  
Pde1a  
Gria2  
Cavin2  
Slc22a8  
Rapgef6  
Nynrin  
Cybrd1  
Gm43634  
Stag3  
Szt2  
Tnfrsf25  
Slc2a10  
Galnt12  
Lgr4  
Sesn3  
Dhtkd1  
Kcnj16  
Rasl12  
Zdhhc15  
Itga3  
Zc3h12b  
Card10  
Gem  
Gigyf1  
Adamts10  
Daam2  
Ccdc171  
Necab3  
Cyp26b1  
Sspn  
4933407K13Rik  
Mir675  
Akr1c14  
Pot1b  
Ghr  
Cd46  
Gjb6  
Gm26606  
Tnrc6b  
Mtcl1

Chp2  
Lmo7  
Cenpk  
Spdl1  
Ung  
Tjp3  
Cenpf  
Mybl2  
Nup210  
Slc43a3  
Ccdc69  
Tmem25  
Kif11  
Kifc1  
Plxnd1  
Eme1  
Grb14  
Kif22  
Hs3st1  
E2f1  
Kif24  
Dok4  
Mki67  
Hapln3  
Kif15  
S1pr1  
Esco2  
Nceh1  
Rad51  
Dsccl  
Gmnn  
Fbxo32  
Fam110b  
Pif1  
Bche  
Gprc5c  
Kif18a  
Cbx2  
Plk1  
Sgo2a  
Sgo1  
Bub1  
Cenpu  
Pole2  
BC106179  
Pik3c2b

Gm26908  
Kat6b  
Zfyve26  
Tsc1  
Enpep  
Rtnn  
Sema3f  
Adamts1  
Arhgef28  
Kif27  
Nphp3  
Gm33023  
Axin2  
Nr4a1  
Ddr2  
Rmnd1  
Ptpn22  
Pcsk5  
2610037D02Rik  
Efhf1  
Hes5  
Rhpn2  
Tex9  
Rora  
Fbn2  
Mfsd2b  
Tcf24  
Rfx5  
9930111J21Rik2  
Pgbd5  
Zic3  
Stard9  
Cobll1  
Scml2  
Hsf2bp  
Parpbp  
Crispld1  
Gm36445  
She  
Arhgap6  
Jmy  
Nrap  
Zfp239  
Itgbl1  
Btbd11  
Rasgef1b

Adamts16  
B3gnt8  
4930579G24Rik  
Fam214a  
Pimreg  
Ptger3  
Adra1b  
Mbd4  
Fanci  
Cacna1e  
Kif23  
Spats2l  
Map2k6  
Stil  
Zfp521  
Aurka  
Pclaf  
Chst8  
Gm42047  
Cenpa  
Cdc45  
Ndc80  
Mmp28  
Rtn4rl1  
Dhfr  
Tcf19  
Nek2  
2510016D11Rik  
Uhrf1  
Ska1  
Cdca3  
E2f7  
Aurkb  
Mcm5  
Mamdc2  
Ccnb1  
Mxra8  
Tmem98  
Xkrx  
Dlgap5  
Rrm2  
Actr3b  
Gpr176  
Chaf1a  
Lpar5  
Atad2

Atp13a5  
Slc40a1  
Slco1a4  
4632427E13Rik  
Kcnk3  
9330159M07Rik  
Rasgef1a  
Ccdc89  
Rasl11a  
AC102815.1  
2610203C20Rik  
Prr11  
Cc2d2a  
Gm35339  
Npr3  
Gm45053  
F8  
Gimap6  
Ushbp1  
Stac3  
Rgs1  
Itga8  
D330041H03Rik  
Satb2  
Cyp4f17  
Cttnbp2  
Syne2  
E230016M11Rik  
Amot  
Zfp454  
Gm17021  
Ttc39a  
Cracr2a  
Dclre1c  
Sox18  
Tek  
Mboat1  
Prdm5  
Prickle2  
Cpt1b  
Gli2  
Egflam  
2700099C18Rik  
Ccdc162  
Gm8146  
6430573F11Rik

Xkr5  
Rragd  
Alms1  
Cpeb1  
Knl1  
Aspm  
Fbxo5  
Prim1  
Arntl  
Kntc1  
Dna2  
Aph1c  
Gpr157  
Ttk  
Ticrr  
Cenpi  
Ccne2  
Mastl  
Dtl  
Rab38  
Dnah1  
Cenph  
Plscr4  
Umod1  
1700030J22Rik  
Rad54b  
Kif18b  
Fblim1  
Brip1  
Pkp2  
Bard1  
Zfp820  
Cdkn2c  
Ska3  
Cdc7  
Nkd1  
Kcnh2  
Chaf1b  
Lmod1  
Ube2t  
Srl  
Fnip2  
Exo1  
Khdrbs3  
Ercc6l  
Tk1

Gm11632  
Tmc5  
Bahcc1  
Scn8a  
Ccgc112  
Prox1  
Adora1  
Gm12258  
Nrg2  
Tert  
Celsr1  
Lrrc32  
Gm13212  
Six1  
E130102H24Rik  
Rbm20  
Zcchc11  
Zc3h6  
Osr1  
Gm12248  
Gjb2  
Serac1  
Ccgc18  
Phldb2  
Nos3  
Csmc2  
AC125351.1  
Itgb4  
Zfp382  
Kcnj2  
Gm22489  
Gm27010  
Plppr4  
Gm3604  
Prdm1  
Ndst3  
Tbx3  
Zc3h12d  
Aldh1l2  
Tet1  
AC137842.1  
Snora28  
Cbx7  
Cbln2  
Mpig6b  
Zfp763

Lrr1  
Klhl38  
Rad54l  
Brca1  
Slc27a6  
Adgrg5  
Timeless  
2010001K21Rik  
Calhm2  
Psrc1  
Ccgc159  
Cdkn2a  
Ccgc15  
Cbfa2t3  
Pask  
Lmcd1  
Troap  
Myb  
St8sia4  
Pole  
BC030867  
Sec16b  
Nav1  
Spaca9  
Myzap  
Oip5  
Kcnc2  
Bspry  
Fzd10  
Clspn  
E2f8  
Mcm10  
Dnajb13  
Ypel2  
Snai2  
Notum  
Wdr63  
4930558J18Rik  
Eps8l2  
Rbp4  
Ppp1r42  
Ptpr  
Cutal  
Pcdhb3  
Lgi2  
Prkcq

Adamts15  
Kcnt1  
Rel  
Alx4  
Zfp970  
Gad1-ps  
Pitpm3  
Atf3  
Fam227a  
Ndnf  
Plekha6  
Gm28006  
Gm4673  
Gm22077  
Exoc3l2  
Amer2  
Syt12  
Neil3  
Zkscan2  
Igf2os  
Fap  
Cemip  
Pde4b  
Egr4  
Zfp808  
Fat2  
Fbln7  
St8sia1  
Ankrd55  
Ikzf4  
Usp43  
Gm44067  
Phf21b  
Alas2  
Gm43759  
Serpind1  
Hist1h2bg  
Hey2  
Gm17971  
Tbx18  
Zfp536  
Ddc  
Pla2r1  
Trp53cor1  
Sned1  
Gm44053

Fam69b  
Rtkn2  
Ddit4l  
Stac2  
Syt15  
Dnah5  
Lrrc10b  
F2r1  
Fgfr4  
Frmpp2  
Kcnj14  
Col6a6  
Till6  
Baiap2l2  
Scn4b  
Fam26e  
AF529169  
Cerkl  
Gm37689  
Gm38399  
Hs3st2  
Crabp1  
EPPK1  
Gm4739  
Cd28  
Gm9816  
Wnt9b  
Gm31409  
Vill  
B3gnt4  
2610507101Rik  
Hs3st6  
Spata9

Fbxl21  
Hlf  
Tbx6  
Gm21781  
Gm37019  
Enpp3  
Gm38190  
Gm11398  
Gm37309  
AC124556.1  
Zscan30  
Ipcef1  
Tfap2b  
Wnt9a  
Gm12454  
Gm43912  
Gm25835  
Kmo  
Tead4  
Egr3  
Tchh  
Cdhr1  
Gpr182  
Gm15816  
Pcdh18  
Gpr160  
Slit2  
Eya1  
Gm35154  
Igdcc3  
Gm37893  
Zfhx2os  
Snhg14  
Gm43437  
Atp8b5  
D030028A08Rik  
Mybl1  
Malat1  
Arpp21  
Zic5  
Adra1a  
Gm27694  
Gm8817  
AL645745.1  
9930120110Rik  
E030022116Rik

Lrrn1  
Spon2  
Ctnna3  
Ptgdr  
Hist1h2bh  
Nlrc4  
Ddx60  
Asxl3  
Gm44574  
Gm36527  
Gm42979  
Gm25994  
Gm15880  
Klhl33  
C130071C03Rik  
Mir6935  
Capns2  
Ahnak2  
Gm2788  
Tll1  
Avil  
Trim63  
Gdpd2  
Foxb1  
Gm43362  
Lgr6  
Gm45743  
Catsperd  
Gm43951  
Hkdc1  
Gm37352  
Gm45309  
Gm36529  
Mmrn1  
Gm17024  
Gm42748  
AC154640.4  
AC129597.1  
Gm37274  
AC151971.2  
Adh1  
Fosb  
Col25a1  
Gm43679  
Gm22589  
Gm38220



Cited4  
Mir7060  
Gm43272  
Nxpe5  
Ptrrb  
Ighj4  
Wscd2  
Nkx6-1  
Zfhx4  
Gm43351  
Gm43088  
Sbspon  
AC139845.1  
Gm20274  
Gm43481  
Gm43039  
Mir6942  
Nup210l  
Gm44164  
Spic  
Gm26514  
AC131586.4  
Serpinb1c  
Foxd2os  
Il7r  
Hectd2os  
Gm5857  
AC157931.1  
Scel  
AC108802.1  
CT009718.2  
Gm43080  
C130021I20Rik  
Gm43693  
Gm43858  
Naalad1  
9430034N14Rik  
Extl1  
Hist1h2ac  
Gm45838  
AC112142.1  
Gm36401  
Gm43389  
Gm8835  
Zfp469  
Pax3

Samd11  
Gm17999  
Gm44033  
Rbm11  
Insrr  
Klhl30  
6430511E19Rik  
Hepacam2  
Irf4  
Gm44423  
Gm38372  
AC124426.1  
Gm38375  
Otof  
Rpgrip1  
C1q3  
Gm11870  
Fam167a  
4930518115Rik  
Rho  
Gm42664  
Ms4a14  
Gm37310  
Cmya5  
Gm16892  
Gm10425  
Asic3  
Acss3  
Gm37168  
D030055H07Rik  
Agr1a  
Fam228a  
Gm22748  
Kcnh1  
Gm43197  
Gm37303  
Scn7a  
Mab21l2  
CT025660.2  
Mybpc1  
Igf1os  
Tspan10  
Pkd1l1  
Rsg1  
Insc  
Gm25749

Spata25  
Nat8f2  
Gm45906  
B230323A14Rik  
Zan  
Sp7  
Gm5977  
Gpr63  
Gm29260  
Gm1141  
4933433G15Rik  
Fendrr  
2610028D06Rik  
Gm45540  
Cbln4  
Fgf10

**Supplementary Table 8.** Wiki pathways outputs from the cerebellum only, cerebrum only and shared genes lists presenting the significantly enriched pathways.

| Cerebrum exclusive data query                      |         |          |                  |            |                |                                                                                                                                                                      |
|----------------------------------------------------|---------|----------|------------------|------------|----------------|----------------------------------------------------------------------------------------------------------------------------------------------------------------------|
| Term                                               | Overlap | P-value  | Adjusted P-value | Odds Ratio | Combined Score | Genes                                                                                                                                                                |
| Cytoplasmic Ribosomal Proteins WP163               | 22/92   | 1.07E-04 | 0.017            | 2.79       | 25.55          | RPS7;RPS5;RPLP0;RPL22;RPL13A;RPL23A;RPL10A;RPL7;RPS4X;RPS14;RPS28;RPS16;RPL18A;RPS29;RPS3;RPLP2;RPS2;FAU;RPS11;RPS10;RPS24;RPL19                                     |
| Cerebellum exclusive data query                    |         |          |                  |            |                |                                                                                                                                                                      |
| Term                                               | Overlap | P-value  | Adjusted P-value | Odds Ratio | Combined Score | Genes                                                                                                                                                                |
| Type II interferon signalling (IFNG) WP1253        | 08/34   | 1.75E-05 | 0.002            | 8.57       | 93.86          | SOCS3;STAT1;STAT2;IFNGR2;IRF1;TAP1;IRF9;IFIT2                                                                                                                        |
| Shared gene list data query                        |         |          |                  |            |                |                                                                                                                                                                      |
| Term                                               | Overlap | P-value  | Adjusted P-value | Odds Ratio | Combined Score | Genes                                                                                                                                                                |
| DNA Replication WP150                              | 24/41   | 3.00E-15 | 4.68E-13         | 14.268487  | 477.1506625    | RFC5;PRIM2;PCNA;RFC4;MCM7;RFC1;PRIM1;GMNN;RPA1;MCM10;CDC7;POLA1;POLA2;CDC45;DBF4;ORC1;POLD1;POLE2;MCM3;MCM4;MCM5;MCM6;POLE;MCM2                                      |
| G1 to S cell cycle control WP413                   | 29/61   | 6.45E-15 | 5.03E-13         | 9.1772984  | 299.866371     | PRIM2;CDKN1B;PCNA;MCM7;PRIM1;PKMYT1;CCND3;CCND2;CDC45;CCND1;ORC1;MYC;E2F1;E2F4;POLE;CDKN2C;CDKN2A;GADD45A;RPA1;POLA2;CDK6;TFDP2;CCNE2;POLE2;MCM3;MCM4;MCM5;MCM6;MCM2 |
| Mismatch repair WP1257                             | 7-Sep   | 1.57E-06 | 8.14E-05         | 35.071389  | 468.7926985    | PCNA;LIG1;RFC1;MSH2;EXO1;POLD1;RPA1                                                                                                                                  |
| p53 signaling WP2902                               | 18/67   | 2.07E-05 | 8.07E-04         | 3.6938436  | 39.84178608    | RRM2;CD82;CDKN2A;GADD45A;IGFBP3;THBS1;GADD45G;CCND3;CCNB1;CCND2;CDK6;CCND1;CCNE2;CHEK2;SESN1;CHEK1;CYCS;GTSE1                                                        |
| mir-193a and MVP in colon cancer metastasis WP3979 | 5-Jun   | 3.45E-05 | 0.00108          | 50.049559  | 514.1953177    | CCND2;CCND1;MVP;MYC;G3BP1                                                                                                                                            |
